# Supplementary material for: Establishment and validation of an electron inelastic mean free path database for narrow bandgap inorganic compounds with a machine learning approach
Source: Royal Society of Chemistry journal article supplement (doi:10.1039/d2cp04393a), 2023-01-01
Supplement: d2cp04393a1.csv [file d2cp04393a1.csv]

IMFP (Angstrom)	Electron energy above the bottom of the conduction band(eV)
Material_MP no.	11	18.2	30	49.4	81.5	134.3	221.4	365	601.8	992.3	1636	2697.3	4447.1	7332	12088.4	19930.4	32859.6	54176.4	89321.7	147267	242802	400312	660003	1090000
BaTe_mp-1000	11.23875909	6.61536784	4.496048187	4.199175292	5.062334024	6.650284085	8.619868289	11.13533007	15.04094879	21.60492022	32.40066726	49.52835046	76.0839627	116.6312348	177.7542371	269.0874243	403.8365545	596.5523044	858.3512287	1191.382904	1578.16453	1967.819134	2293.883898	2531.729138
BaO2_mp-1006878	23.77811903	13.3726007	7.560478637	5.432573649	5.218390576	6.065365683	7.667730445	10.12833561	13.96891669	20.02132248	29.41625385	43.93422197	66.50189691	101.3755949	154.2174044	233.0005171	349.1686765	515.9197141	742.199375	1025.969387	1348.459428	1668.633124	1933.739377	2116.100459
GaN_mp-1007824	21.98540831	11.49248561	6.202377545	4.521327451	4.477259616	5.317608326	6.858775424	9.31202535	13.22620472	19.34774221	28.63312646	42.6487356	64.07182933	96.8980227	146.6803261	221.4209395	332.1613694	490.9462404	706.1021181	976.8799943	1285.521933	1590.671622	1847.419311	2046.870151
BrCl_mp-1008492	20.40867918	11.13267206	6.445914267	5.078030136	5.471873419	7.022183402	9.537098171	13.19669088	18.66069089	26.93377752	39.36562167	58.20192035	87.36094049	132.8782026	203.2851241	310.7201807	471.6488011	703.6129678	1017.00797	1405.489231	1834.87498	2235.93839	2534.151443	2709.969952
BaO_mp-1008500	17.94032918	10.26881632	6.198944533	4.824577303	4.962173042	6.00820454	7.689213995	10.09888916	13.80116499	19.72183133	29.10989464	43.8346125	66.83783348	102.3247648	155.8795787	235.43022	352.4702074	520.3903068	748.5775492	1035.993681	1365.785881	1699.097346	1983.337573	2188.478176
BP_mp-1008559	20.9565302	11.70778012	6.470884074	4.659038826	4.445541514	5.083535866	6.435482947	8.767754145	12.63464619	18.73217403	27.94571839	41.81085055	63.02069223	95.565225	144.9367526	219.0932029	329.1302064	487.2325705	701.9151094	972.5544712	1280.963874	1584.426435	1836.531637	2025.971204
Cs2Se_mp-1011696	6.448994595	4.081388948	3.137410798	3.41326894	4.790518115	7.12125449	10.01269425	13.46100122	18.39313687	26.45376776	39.89410728	61.91187314	97.10458452	151.6641161	233.7383642	355.0284497	532.4462818	786.2445965	1133.921548	1581.510594	2107.030751	2640.750872	3089.684406	3415.107802
P2Ir_mp-10155	17.73171321	10.95135137	6.628293433	5.037576611	4.804194998	5.272187364	6.352604937	8.375963766	11.92926234	17.66122513	26.25227603	38.84926768	57.69028361	86.44999408	130.5366422	197.6376539	297.4587959	439.2563446	628.6368997	865.3087998	1136.290339	1406.235619	1632.575612	1801.762026
Re2O7_mp-1016092	37.31321043	20.9626911	11.03315164	6.922165107	5.755518774	6.019265442	7.209243169	9.379289187	12.96000685	18.59090708	27.07349484	39.72195044	58.90144166	88.24026465	132.6720706	199.1716772	297.73582	439.7205323	632.0195342	871.080762	1139.967618	1405.373919	1622.63234	1763.078488
LaN_mp-1018049	18.09047292	10.20363494	5.986224106	4.639813993	4.741292236	5.624110725	7.052363474	9.213040752	12.70369026	18.37597937	27.28979763	40.99680405	62.00889001	94.09204538	142.5104904	214.7226001	320.8071597	471.7558765	675.7915016	934.3596118	1234.6543	1540.111695	1803.927784	2009.094429
PbS_mp-1018115	15.99485984	9.21390629	5.703479257	4.73099664	5.045562	6.015949801	7.423697292	9.544537092	13.07365459	18.90752188	28.07022409	41.99544866	63.0769654	95.14765595	143.9199797	217.591394	326.6885089	481.8036181	690.3320407	953.2489558	1256.30234	1558.718131	1811.408584	2003.101221
HgSe_mp-1018722	16.37305136	10.00673225	6.250013446	5.012943448	5.025782062	5.631325987	6.692742812	8.552280323	11.87039267	17.4062228	25.89986477	38.36152472	56.75097611	84.58756604	127.3837714	192.949239	290.6938785	429.2021257	614.0095862	846.3707635	1115.729405	1387.280297	1615.826364	1787.695588
PdCl2_mp-1018888	15.83670239	9.51899973	6.017628166	5.092127264	5.626501834	7.124024897	9.492564664	13.0884114	18.68579751	27.2792677	40.19259056	59.82024735	90.50951306	139.0440856	215.1562278	332.6816221	509.6184889	763.4536733	1102.016411	1513.36597	1952.034098	2333.400801	2580.4412	2690.814384
LuO3_mp-1021512	31.7657546	18.4583888	9.777091809	6.306952201	5.270235452	5.331311626	6.119961998	7.808651851	10.89315373	16.0040072	23.82135128	35.38044197	52.66309404	78.99635664	119.2526965	180.1793345	270.2518133	397.7900544	567.9808583	780.2699567	1022.531347	1262.716424	1460.084044	1598.952159
GeRu_mp-1025397	12.41897829	8.648497569	5.954611125	4.994258461	5.048481784	5.766040471	7.24843147	9.962154094	14.54830926	21.62039602	31.95200782	47.23021844	70.60352236	106.632408	161.5467456	244.5698378	368.4375359	546.0215871	784.4993187	1081.30396	1417.383363	1747.633951	2017.162922	2196.631363
SmO3_mp-1025421	17.44070708	10.93547318	6.65204586	4.92809393	4.482154703	4.741602594	5.670305319	7.548586549	10.78695365	15.80043987	23.19415485	34.31352621	51.57531738	78.34575006	119.1188951	180.6975573	272.8913073	405.8918539	584.8566958	805.6581266	1051.007608	1287.702828	1481.724692	1620.438182
BaC2_mp-10293	18.87688031	10.0756658	5.713568331	4.353428976	4.539507407	5.680799224	7.557707103	10.26569228	14.33016237	20.64204041	30.45746553	45.73191822	69.54169118	106.1739633	161.218314	242.6845691	362.4071773	534.4391976	769.0687834	1065.665575	1405.681108	1747.016256	2038.395734	2258.33491
Cs3Sb_mp-10378	5.127206732	3.538360924	3.040906017	3.734642513	5.704565185	8.776621306	12.38176869	16.55266366	22.50830957	32.29769764	48.76311096	76.03612877	119.9184972	187.7156569	288.4926604	435.3255997	647.6982308	949.9335297	1365.65442	1907.543317	2551.099491	3204.169477	3746.982623	4137.750403
RbSb_mp-10487	8.124753435	5.340327593	4.131193154	4.432646731	5.928494175	8.308105654	11.282045	15.11697746	20.81372027	29.91020217	44.64829694	68.57631367	106.9070281	166.1720698	254.3293695	383.044702	570.0194868	836.7397336	1201.71204	1670.513055	2215.518532	2756.475484	3199.74418	3517.379413
CsH_mp-1057286	11.02519338	5.72123543	3.501464576	3.005471507	3.595826401	5.116679286	7.474308328	10.65945385	15.10700426	21.79254179	32.22088543	48.68471028	74.54691728	114.1097492	172.6133694	257.8848214	382.7580092	563.6343229	812.6753582	1128.658195	1492.504845	1866.415608	2204.036163	2481.487494
SrS_mp-10627	11.87398779	6.997632428	4.519630836	3.981699137	4.702994217	6.39567072	8.899785437	12.34166715	17.39066326	25.18774195	37.34219032	56.37314342	86.30563719	132.9131241	203.9207436	310.2306249	467.2624183	692.8013714	1000.136983	1389.296215	1835.02149	2275.243343	2633.71816	2879.621914
PbSe_mp-1063670	14.30776436	8.467274244	5.427886879	4.645119528	5.008717489	5.93328292	7.251231841	9.289312564	12.74289417	18.45897518	27.38612449	40.87682771	61.22389748	92.10510934	139.0344279	209.9811426	315.1238045	464.532161	665.2495191	918.643912	1211.598428	1504.856699	1751.511345	1941.961975
KC_mp-1064300	13.35191986	7.980450565	5.332470969	4.843858002	5.592966812	7.101672768	9.176833382	12.04928828	16.38671057	23.25650617	34.43643675	52.99232631	83.41764175	130.8583948	200.7527912	301.2075309	446.1614787	653.9145926	940.1663456	1308.495291	1737.116564	2170.457465	2549.268594	2857.461636
ZrBr_mp-1065846	11.78307652	7.699890457	5.286322357	4.588770935	4.859326691	5.771039289	7.39854689	10.13225761	14.50325117	21.09238144	30.89082663	46.01100727	69.94596034	107.1653698	163.2527207	246.855871	371.260732	551.1751839	795.0875767	1098.4473	1437.090184	1762.668091	2023.469518	2195.781433
ZnS_mp-10695	16.92669667	10.65478867	6.513557748	4.911221104	4.879549503	5.872741145	7.750997693	10.73214929	15.41253174	22.63291297	33.43991929	49.55778615	74.12774109	112.0760302	170.2347477	258.1089044	388.7435398	576.6912607	831.891585	1153.04319	1520.512207	1886.338763	2182.318019	2364.563228
GeO2_mp-1072104	31.27689176	17.96141962	9.337649572	5.892966267	4.949627029	5.202864975	6.28513094	8.341086825	11.83916058	17.38595722	25.66940953	37.84446487	56.15383325	84.25820138	127.3793692	192.8210904	290.3116485	430.1716872	618.9421337	854.8792478	1122.369244	1385.111078	1596.55484	1734.156446
HgO_mp-1077107	24.9333392	15.01967316	8.466001184	5.825171299	5.027311805	5.05058752	5.649436879	7.0570169	9.777163509	14.39531837	21.44146525	31.62560236	46.46441595	68.8107086	103.1268498	155.5924516	233.4485763	343.077642	488.4098351	670.4326421	882.0601201	1098.282452	1284.486519	1427.569246
RbC2_mp-1077369	17.22780664	10.17007441	6.418918928	5.238136531	5.280559268	5.937170466	7.092695635	8.980870274	12.033068	16.87385429	24.63108941	37.39462158	58.24789214	90.60372124	138.0059586	206.1041588	304.9584396	447.438572	643.5603727	894.3232964	1185.331241	1483.394679	1753.855056	1984.071316
ErSe2_mp-1077779	11.51074847	7.644916511	5.224455922	4.465643686	4.646324249	5.447878764	6.96323384	9.613594456	13.9673874	20.58372775	30.27336361	44.82731433	67.44700337	102.6058316	156.3237127	237.7112334	359.8145679	536.1944204	774.1610963	1069.383493	1399.256246	1716.004557	1966.132648	2125.088298
SiI3_mp-1078195	21.61047345	12.12195493	7.660684352	6.243403102	6.709201641	8.484067984	11.25091324	15.08734927	20.76718327	29.64841368	43.55437238	65.19447974	98.93611172	151.2592701	231.0860991	351.4556076	531.6653744	793.8858709	1150.249404	1588.980707	2070.386357	2527.002478	2874.883369	3063.206566
WBr4_mp-1078239	14.04414264	8.410420425	5.300338944	4.328616391	4.432955155	5.177394568	6.573746259	8.967690614	12.87338571	18.82742115	27.58614979	40.73531273	61.10671423	92.7532633	141.2621402	215.0674927	326.0503443	486.3613487	702.2239952	968.8019232	1264.286009	1545.600264	1769.464674	1924.446932
LaO3_mp-1078452	20.68701765	12.04481784	6.937151594	5.077143359	4.729613945	5.14866914	6.214975295	8.207015341	11.62889012	17.06710525	25.27697097	37.64836108	56.64103894	85.85319523	130.234314	197.025456	296.201536	438.1271138	629.0202664	866.7603903	1134.611136	1395.927763	1612.705895	1776.821793
Al2S3_mp-1079029	18.05535746	10.51475023	6.199136208	4.669111863	4.79250432	6.066068518	8.363101575	11.80570911	16.86708377	24.37320867	35.60111885	52.80515555	79.81912405	122.1480645	186.9099645	284.0732499	428.4766219	638.0237362	924.942252	1285.009399	1690.387134	2085.704882	2401.478684	2597.466813
CoO4_mp-1079523	20.40566095	12.19854976	7.053706399	4.925633935	4.215106299	4.238329419	4.886484782	6.329057565	8.825477889	12.65781106	18.35705919	27.14727758	41.09125239	62.82054559	95.61383587	144.6268617	217.9009135	324.2556129	468.1528987	645.56725	842.1216464	1033.477964	1196.897727	1323.732655
NO_mp-1079684	26.08584889	14.54729418	7.814301989	5.141728239	4.225905424	4.133718428	4.663191254	5.940332944	8.212172745	11.77143813	17.12736326	25.38423671	38.39287273	58.53848461	88.82135206	133.9272855	201.0870696	298.2367436	429.5753387	591.8594251	772.3731609	949.3244145	1103.565352	1231.284959
KSe3_mp-1080121	10.96954049	7.070767419	4.935641909	4.453678965	4.931520274	6.047927428	7.831019228	10.62603384	14.96075038	21.50663386	31.47324343	47.27464188	72.70280671	112.3659789	171.6993327	259.1998001	388.6372671	576.2607824	832.8323355	1155.376008	1518.841039	1871.594107	2159.453575	2359.613351
P4Ru_mp-1080439	15.52414429	9.311429514	5.644014846	4.444029268	4.524095229	5.37244451	6.952817596	9.620243569	14.00769132	20.83534677	30.96210743	45.9585121	68.74302059	103.8156624	157.5772249	239.3229164	361.5877418	537.3727057	774.9097755	1072.429502	1409.176782	1736.832679	2002.404332	2191.396393
P4Os_mp-1087509	16.08410538	9.481402169	5.639699703	4.356726452	4.351309792	5.073709789	6.466514479	8.859373565	12.84532246	19.07952176	28.28107815	41.74084527	61.96057171	92.96011736	140.6114268	213.4159042	322.5533991	479.2802318	690.6477339	955.6542913	1257.518715	1554.972488	1801.316251	1983.767378
Al2Ru_mp-10910	11.51765551	7.905563088	5.498992541	4.716424464	4.89059901	5.705685256	7.247773459	9.920925654	14.27212612	20.88135795	30.68482128	45.68294354	69.23007733	105.6567358	160.3927404	241.832851	362.9218014	538.3715992	777.8824215	1079.959144	1424.851781	1767.644211	2055.494929	2258.190372
GeO2_mp-10913	27.58055453	15.83943524	8.337398135	5.433467412	4.682772331	4.972117432	6.036072348	8.094044126	11.66837673	17.37817462	25.86169617	38.18796035	56.53783287	84.59957057	127.791831	193.7356489	292.2373135	433.1428658	622.4645626	858.6221723	1125.829845	1386.255533	1594.569734	1734.705102
N3Cl_mp-1095181	29.98634443	15.82269005	8.287240548	5.630459766	5.349017476	6.439079481	8.639626234	12.05283552	17.12704001	24.62125881	35.72369547	52.59505284	78.928308	119.9789616	182.5148461	276.0806301	414.9029632	615.9128878	890.0061973	1231.233844	1609.721913	1970.290682	2251.085483	2425.252999
OF2_mp-1095223	48.03103099	26.1228408	12.63161716	7.404107176	5.888625078	6.021907501	7.213174802	9.548757533	13.48846593	19.66246637	28.86476325	42.52565729	63.34938506	95.56197114	144.9933292	219.7991096	331.2090605	491.4816489	707.8368503	975.5505363	1271.706038	1550.969178	1761.102859	1880.795169
CdS2_mp-1095440	16.45520072	9.986182527	6.083319165	4.806156856	4.98663604	6.066326782	7.922649881	10.85995726	15.58814732	23.02432677	34.23506629	50.92813135	76.25378594	115.3224127	175.5537888	267.3631393	404.2175782	599.8941037	863.416092	1193.629774	1568.649394	1933.267047	2219.971928	2403.855452
CdSe2_mp-1095493	14.59036718	9.135597265	5.880784931	4.912961401	5.199104209	6.209505569	7.854399885	10.51213715	14.92982367	22.00368879	32.75387036	48.81837006	73.19255857	110.7024298	168.4211021	256.3793133	387.3226462	573.6751508	823.1575702	1134.707288	1488.024735	1830.915129	2102.662408	2286.446434
YbB12_mp-1103888	16.99733885	10.902522	6.70691696	4.942293386	4.419123834	4.583388697	5.389187506	7.079664653	10.01243435	14.57054583	21.36678956	31.72344978	47.8583685	72.59665598	109.4643396	164.0366638	245.0788002	362.6109301	523.1470709	725.5653415	957.348788	1191.520582	1397.953499	1560.697605
W3O10_mp-1104455	20.49016061	12.17387051	6.908802802	4.766529689	4.081496332	4.145609766	4.860647418	6.446930018	9.247382047	13.58299005	19.87763695	29.14314751	43.30469138	65.14918015	98.52014407	149.2499592	225.5699679	335.7752858	483.7978553	666.1744325	869.5154487	1068.34083	1236.705359	1365.60416
V2O5_mp-1104615	26.24683876	14.39208814	7.75639105	5.324806858	5.045756493	6.033304339	8.061090648	11.25939799	16.09371301	23.3020292	33.97043428	50.04383499	74.90384283	113.4589801	172.1290204	259.9884007	390.4569938	579.442626	837.4046525	1159.796697	1520.71812	1870.051521	2147.602443	2322.313747
BaO2_mp-1105	23.96537828	13.5350365	7.62574979	5.443869934	5.181961738	5.963626425	7.480429797	9.842949764	13.57022098	19.47195875	28.6327305	42.75463726	64.65394559	98.4637011	149.7236307	226.2193549	339.0055246	500.712644	719.9449496	995.064119	1308.41823	1620.325517	1879.399317	2058.956057
BaP2_mp-1105095	13.61435953	7.974194741	5.117388011	4.475075197	5.064616789	6.418806707	8.386379216	11.24458042	15.70104451	22.75355094	33.79262086	51.08583624	78.21883394	120.118368	183.2729397	277.0889987	414.9815272	612.1280419	880.0369673	1219.761817	1609.775433	1995.356404	2316.467529	2560.110558
NaSn_mp-11051	11.30882152	7.021875111	4.939357769	4.719547611	5.649475964	7.302853679	9.499114273	12.5275832	17.14715189	24.48600513	36.29604914	55.51519317	86.47266323	134.3395181	205.0419531	307.4532462	455.8651472	668.1499829	959.5033739	1334.197105	1771.694896	2214.619494	2597.643133	2900.078943
BaP3_mp-1105406	15.20905138	8.505732969	5.141818515	4.267492726	4.745837934	6.102731682	8.173048503	11.16492744	15.74260174	22.89713028	33.96388368	51.05787763	77.62010089	118.6459055	180.9570047	274.3086928	412.2589224	609.9494129	878.5206578	1218.100647	1606.414278	1988.631644	2302.716438	2532.879489
Tb2Te3_mp-1105684	12.19453989	7.708377995	5.244690247	4.70386096	5.240290733	6.356857197	7.933979151	10.35944773	14.41271298	21.03598901	31.30574263	46.83400175	70.39968004	106.4125801	161.3979452	244.7459432	368.4759873	544.5004504	781.0988369	1079.610234	1423.562034	1764.264621	2042.683536	2242.660922
Y2Se3_mp-1105821	13.62537064	7.903326017	5.018273044	4.362466541	4.98554751	6.436357656	8.528455141	11.50368943	16.11033602	23.41912034	34.79124692	52.28897525	79.28175802	120.8234221	184.0518217	279.1837369	419.9590873	621.0937356	893.1030009	1236.151641	1628.208378	2012.918489	2325.317717	2549.164074
Er2S3_mp-1106290	13.37574067	8.769534855	5.849938505	4.961396469	5.215838961	6.147457312	7.736554067	10.40347215	14.87210936	21.97248479	32.70208968	48.80598732	73.43924884	111.4366784	169.657188	257.9333416	389.1514305	576.1312811	826.6956723	1139.251346	1492.831481	1835.454329	2107.387611	2289.536811
Na3As_mp-1136	11.02332096	7.345853724	5.452227328	5.25187537	6.085099186	7.527041599	9.461333636	12.17105819	16.25261245	22.65813843	33.17399636	51.05550213	80.94935782	127.5687398	195.0268277	290.0848803	426.4999956	623.4750872	897.675622	1253.421251	1671.336665	2100.891367	2483.549618	2787.152741
Ho4C7_mp-1154	19.13428952	12.02843164	7.304671893	5.464007416	5.050762807	5.361572348	6.301957727	8.184922472	11.55086881	17.01734848	25.32674854	37.78789483	56.75374195	85.7514614	129.6863888	195.6099405	292.9073028	431.077036	616.2228258	848.2882507	1114.665909	1381.78771	1609.655968	1783.85737
GaSb_mp-1156	13.44594622	8.000894232	5.202033873	4.504786579	4.911445818	5.971311193	7.632469548	10.2307516	14.37006738	20.79639091	30.58755034	45.69187285	69.26613735	105.5435686	160.081036	241.2841592	361.4709441	534.2779734	769.0183717	1065.047013	1403.150022	1737.982384	2020.671921	2237.612349
CsTe4_mp-1178386	10.53079736	6.576294382	4.623795963	4.408385092	5.256672091	6.759825312	8.776662034	11.65969905	16.21102041	23.48184872	34.85302573	52.5245079	80.00610499	122.2712145	186.1699212	281.7856795	423.104591	625.2851727	899.4781265	1246.76477	1644.918217	2034.846622	2349.8498	2574.126273
YH3_mp-1178678	35.6337455	17.55066599	8.533291736	5.156173907	3.920963264	3.576727919	3.795749827	4.586437551	6.064422652	8.407876085	12.0004834	17.66059121	26.64320764	40.36221594	60.41548852	89.52885074	132.4481057	194.964829	281.279299	392.0383845	523.6074689	667.9787657	817.872023	971.8783554
SrH2_mp-1179094	26.75503696	12.15596977	5.867902785	3.973066635	3.806234499	4.497723502	5.816520014	7.872709986	11.07246008	16.03258378	23.60600238	35.16063266	52.8534136	79.62671518	119.3295071	177.6622063	263.1279384	385.7775696	553.3851357	767.0525937	1016.0642	1274.488414	1515.351121	1737.683178
ScO2_mp-1179114	19.42972164	11.54338355	6.793992847	5.073038256	4.813223712	5.330142227	6.529319051	8.705949596	12.38260044	18.1829754	26.97346651	40.38065553	61.19202812	93.30620288	141.8998379	214.6228842	322.4409147	477.2343902	686.3816616	947.2700603	1240.225288	1523.862218	1756.29373	1927.806346
PO4_mp-1179817	26.67916645	14.47100845	7.689176979	5.189910429	4.512011115	4.687623533	5.521599382	7.208415752	10.12655679	14.72453818	21.6529147	32.20065888	48.60360623	73.9810919	112.4859089	170.3233447	256.432235	380.3146572	547.1780422	753.4349258	982.4094168	1203.052133	1387.342804	1532.871851
NdO3_mp-1180065	17.57840697	10.93653031	6.63440982	4.919574653	4.485834729	4.755626922	5.689222848	7.561565051	10.77607495	15.74650562	23.09224476	34.18305534	51.45222012	78.25580227	119.0423757	180.5625042	272.6255407	405.5049935	584.4619001	805.3733043	1050.878124	1287.87827	1482.776386	1623.338467
NO4_mp-1180345	24.55543783	14.34748955	7.848229012	5.214222346	4.349747778	4.352045069	5.050907583	6.646684866	9.499554773	13.98924069	20.62627443	30.51686129	45.69723178	69.08219977	104.6393412	158.3690845	238.8462265	354.9073431	510.8043736	702.1759872	912.7437516	1113.30632	1276.836182	1397.95228
BaO10_mp-1182511	22.18493155	12.84124533	7.233799712	4.988999695	4.262681124	4.288544547	4.929925263	6.353358098	8.836136361	12.69349122	18.47497463	27.3838104	41.43984708	63.24555058	96.07260695	145.0242627	217.960318	323.4762063	466.0713176	642.1468378	837.6908436	1028.318714	1191.71132	1321.698724
IF7_mp-1184928	43.78937641	23.5145933	11.5025838	6.972288388	5.690569175	5.839867448	6.916809591	9.050499361	12.72900637	18.58800455	27.36887638	40.34443354	59.96659854	90.21228766	136.7710648	207.6156421	313.2301733	464.3355228	666.8598454	916.6911336	1193.336854	1454.574997	1653.318392	1775.210427
ZrS2_mp-1186	15.96573243	9.134500126	5.554857618	4.569046891	4.949209355	6.175113529	8.128969202	11.10375869	15.78169338	23.08101986	34.22680229	51.27745243	77.70460474	118.5929861	180.9376872	274.7932027	413.9459621	613.2004046	882.4662465	1219.904682	1600.762603	1968.481857	2263.348175	2474.022545
Ho2Te3_mp-1189209	11.7744258	7.600096502	5.239567722	4.701377372	5.185311081	6.240549349	7.815022241	10.32396537	14.50986913	21.23732834	31.53208634	47.07175894	70.7849852	107.1659477	162.7094563	246.8551183	371.9798526	550.4834077	790.6356322	1092.886327	1439.435742	1780.775007	2057.776332	2252.08272
Lu2Te3_mp-1189748	11.84648177	7.628390193	5.238185223	4.683518846	5.152024355	6.181922245	7.712020915	10.15508014	14.25737585	20.88352867	31.02361503	46.25404828	69.36318384	104.7350312	158.8050587	240.8915865	363.0260764	537.0798652	770.9801193	1065.471023	1403.860502	1738.231137	2010.626375	2203.377347
TlCl3_mp-1189960	18.86749101	10.31994605	6.344141533	5.252308159	5.932423757	7.969583935	11.14627572	15.48672558	21.63414084	30.84977165	44.97378446	66.90887162	101.3287678	154.9554204	236.7844885	359.8367581	543.4549732	810.2211567	1173.726058	1624.28579	2121.278393	2591.685366	2950.532995	3156.769108
S5N3_mp-1195888	19.98066262	11.50981168	6.712421487	4.907509448	4.459082952	4.699760203	5.527727115	7.131435731	9.810167199	13.93705634	20.21963275	30.14428518	46.09425085	70.99443142	108.3282373	163.5598763	245.4681863	364.0631747	524.9952894	724.5027991	946.4282708	1162.73135	1348.270554	1496.373036
WO3_mp-1197857	34.11298309	18.476159	9.330132446	5.881873235	4.917328108	5.049801282	5.900348394	7.617908189	10.66381061	15.6180668	23.0900968	34.01874536	50.23869575	74.85483268	112.4540746	169.4855955	254.194804	374.7734944	536.1987405	737.4866887	966.7423627	1194.518966	1384.658709	1524.799138
CS3_mp-1199888	19.30527265	11.03723416	6.495480837	4.874833915	4.585503043	4.98102569	5.965730631	7.751316288	10.68438309	15.20564996	22.11686076	33.05088189	50.61750925	78.04966587	119.2235307	180.1516338	270.4001168	400.9247458	578.1896229	798.5827816	1044.419218	1283.870425	1488.167053	1650.806825
S7N_mp-1203253	20.68113794	11.43891144	6.596242838	5.042285596	5.007656514	5.777235642	7.211275358	9.569134632	13.3743686	19.31490468	28.4334959	42.6532676	65.14196844	100.2050639	153.4139753	232.9311278	350.5780133	519.286426	746.8405109	1029.164578	1342.646699	1641.295691	1882.847605	2063.954618
CN_mp-1203301	32.45509826	16.26353224	8.176765443	5.342457332	4.556516446	4.648130343	5.337945472	6.754599453	9.219012508	13.16620489	19.28632277	28.87003977	43.9895986	67.3209155	102.2001382	153.6741565	229.4477214	338.2995839	485.9609737	671.0238423	881.0292313	1091.43031	1280.6661	1449.408918
Tb2S3_mp-1205297	13.65744397	8.820676864	5.823756333	4.932116525	5.222727765	6.212405139	7.855328153	10.55746663	15.05841141	22.23018494	33.11512993	49.47909467	74.49384056	113.0608592	172.1691516	261.7892827	394.9098177	584.4942221	838.6869083	1156.289885	1516.263751	1865.553114	2143.030611	2330.198533
PtS_mp-1205321	14.17098586	9.482459379	6.138919902	4.808144901	4.563729772	4.969031091	6.074886094	8.277883094	12.13409219	18.13443555	26.77650216	39.22328514	57.92838987	86.79452784	131.4854637	200.2897856	304.0053997	452.7159469	651.2566352	896.9376617	1174.483033	1447.262708	1670.343584	1821.554179
Sc2Se3_mp-1205354	13.46362423	8.243659165	5.40386642	4.700300515	5.186022546	6.401000055	8.263208742	11.11664497	15.65740958	22.79463225	33.80587378	50.89976611	77.67569207	119.102474	181.7397181	275.1589518	412.9631363	610.1216655	877.0118092	1212.705668	1593.784132	1964.947967	2266.896137	2485.142909
Ga2O3_mp-1243	31.37223769	18.38172144	9.91006955	6.294546692	5.271219083	5.547999511	6.687851767	8.744099371	12.11009667	17.38716524	25.38092074	37.46207472	56.06118844	84.81403231	128.5282316	193.8866652	290.5503378	429.7783284	618.8994084	855.3473626	1123.355433	1390.499861	1612.142784	1758.07464
BaSe_mp-1253	12.70212818	7.349468034	4.818541586	4.268063646	4.962043747	6.498555729	8.58799492	11.33565406	15.48069478	22.22811218	33.14426264	50.42305463	77.38232056	118.8325033	181.4689781	275.0238097	413.2864776	611.8742156	881.91652	1223.042739	1615.004168	2007.740621	2335.479813	2567.300529
PtO2_mp-1285	22.03631419	13.86084163	7.901319675	5.363131629	4.510273235	4.494362887	5.169415067	6.797766949	9.852789111	14.79928054	22.00725429	32.19348816	47.08819946	69.77682444	104.9301502	159.1453864	240.4402048	355.8238026	508.6196707	697.4520616	911.9267989	1124.979137	1303.456146	1435.124515
Ca3N2_mp-13146	13.785455	7.954395424	4.919796811	4.158066976	4.715034823	6.199007056	8.478198053	11.75375218	16.69287872	24.36374683	36.33076011	55.15660608	84.90180423	131.1333941	200.9856302	304.5300412	456.3855021	673.8668374	970.6510779	1348.026021	1781.590004	2210.341767	2564.479551	2822.750155
CdSb_mp-1321	10.0719445	7.073963892	5.151424698	4.682445362	5.124599086	6.220091831	8.10778208	11.29886847	16.4892753	24.37940974	35.98128019	53.48489787	80.79771272	123.4136111	188.728007	287.8148218	436.3809264	650.7475642	940.047409	1299.834634	1702.855338	2088.376963	2385.437229	2558.689363
Ga2Se3_mp-1340	18.24241261	10.00638172	5.840810005	4.613565587	4.891190717	6.062818302	7.916878343	10.64960373	14.90728807	21.6185369	31.93581907	47.60181036	71.55030601	108.3081059	164.3567789	248.9875307	374.7020967	554.7869163	798.0542366	1103.060983	1449.2659	1788.226171	2063.867859	2260.440065
PdS2_mp-13682	12.15306529	7.6980796	5.08905565	4.418536434	4.907545551	6.220869584	8.400415452	11.88284001	17.40252396	25.78541554	38.11950095	56.57596407	85.21726931	130.3024202	200.7732701	309.6129887	474.0963733	711.0389034	1027.505259	1411.406175	1820.015257	2176.042402	2410.068349	2517.586915
SnS_mp-1379	15.76679156	8.636003878	5.177549521	4.298802772	4.762842051	6.066213607	8.056300883	10.98166431	15.51736142	22.59166783	33.38246198	49.76272316	74.89712851	113.5800235	172.6458504	262.0011729	395.0397061	585.9316503	844.1284244	1168.124646	1534.87829	1890.80121	2178.790893	2389.823953
PdF4_mp-13868	23.33197333	13.80061238	7.640128179	5.251319587	4.649502392	4.965812727	6.0701917	8.272666328	12.1180138	18.15107548	26.91984501	39.57334929	58.59165858	88.12329573	134.3254187	206.0800059	314.7657124	470.8303237	678.0424466	928.6890454	1197.494678	1438.306899	1608.229176	1703.311817
Cr5O12_mp-13869	26.83323655	15.19782343	8.034004051	5.334447796	4.73946131	5.200225523	6.468108043	8.765973121	12.64133954	18.78617015	27.9977725	41.61010525	62.14146021	93.62315154	141.7910079	214.7258264	323.1984942	478.620904	688.4936005	951.4055794	1249.464209	1540.376083	1773.640962	1930.508962
ZnP2_mp-1392	14.94209329	9.380695894	5.933916615	4.81902434	4.978859967	5.919779061	7.614852259	10.45239353	15.11977362	22.42404819	33.39296557	49.904115	75.32957651	114.7165046	175.0743488	266.5012996	402.684667	597.8923248	861.0961884	1189.937364	1560.425415	1917.367911	2200.277035	2391.238411
Ba2Ge_mp-13922	9.540343649	6.369490883	4.821515734	4.808048598	5.794636624	7.441357398	9.697623129	12.9408979	17.88315429	25.52959717	37.59776015	57.19432277	88.88089907	137.7756622	209.4145244	312.6504573	462.8004611	679.3006246	978.060771	1362.552224	1810.649494	2262.222771	2644.373406	2919.157654
Rb2O_mp-1394	8.963368768	5.552357945	3.94988028	3.932439198	5.10441394	7.235240639	10.07150718	13.73605794	19.06771374	27.51487379	41.20571388	63.45421986	99.20562621	154.9001093	238.4678417	361.0452221	539.1349332	793.0168745	1140.483906	1587.146404	2108.34783	2631.651194	3069.41909	3392.923587
K3Sb_mp-14017	7.151465854	5.025359584	4.211207701	4.838755856	6.778517959	9.768543281	13.45902898	18.03732607	24.51118194	34.66619069	51.55086005	80.36651605	128.5286484	203.9815015	314.2036624	470.4394975	693.8040906	1013.773452	1457.591611	2034.193605	2708.874883	3383.612976	3944.123417	4342.068702
Sm2S3_mp-1403	12.8670512	8.385686882	5.640690255	4.892708263	5.306797545	6.435022283	8.234835108	11.12142415	15.86657343	23.40069119	34.87490063	52.24609751	78.96110053	120.2489611	183.4745184	279.1486522	421.1193131	623.4412378	895.1237746	1234.861118	1619.46705	1991.131944	2283.789051	2477.492976
P2Ru_mp-1413	15.25152364	9.836587785	6.267460611	4.98983172	4.941225463	5.612892676	6.999396444	9.491501116	13.71568008	20.35271034	30.24068067	44.98184685	67.51083226	102.1945595	155.0948697	235.0514719	354.0808834	524.4490194	753.4002006	1038.58467	1360.293071	1673.236068	1926.859174	2103.527336
CaSe_mp-1415	12.20870727	7.117009644	4.557075908	3.957105135	4.637873605	6.330847777	8.886881203	12.39468815	17.46933388	25.22142297	37.25505206	56.09997967	85.79665192	132.1063272	202.6659252	308.2829171	464.5462668	689.7061916	996.9841903	1385.057105	1827.759283	2264.972384	2621.905234	2864.093222
SrSi2_mp-14172	10.89012156	6.969395454	4.855477541	4.381874161	4.858468512	5.968385279	7.727458614	10.44492694	14.59871577	20.8293596	30.35989828	45.62463844	70.34493732	108.8231317	165.8634934	249.1956682	372.1188314	551.1835836	798.5391642	1113.680392	1475.363409	1837.082543	2148.072395	2382.696163
Sr3P4_mp-14288	12.45526447	7.433721544	4.900051568	4.419885721	5.160851762	6.720897028	8.956758454	12.14287287	17.02084176	24.67856685	36.69307483	55.67289831	85.69595357	132.2263865	202.2636532	305.9326938	457.9802905	675.493057	971.6714547	1347.687232	1778.868001	2203.415688	2553.926654	2814.678306
MoS2_mp-1434	17.09979947	9.836059163	5.799419547	4.531101842	4.732242646	5.843267362	7.731172668	10.6549997	15.27051933	22.46326782	33.31520037	49.56698662	74.31650415	112.4281411	170.85036	259.4345566	391.2947396	580.2926398	835.7068978	1156.291676	1520.485571	1876.156067	2161.70448	2356.706705
CdTe_mp-1492	10.37935888	7.21337875	5.175165172	4.61914481	4.963888747	5.939729406	7.676582764	10.65588987	15.52245443	22.91791872	33.78631702	50.20544548	75.89145273	116.0645955	177.7504386	271.4924723	412.2821667	615.6641767	890.1028421	1230.819292	1611.439734	1974.549052	2253.76936	2416.249117
BaS_mp-1500	12.52979765	7.265549341	4.715532974	4.142387023	4.841652397	6.476109852	8.809216781	11.91821194	16.48230975	23.68412032	35.14736621	53.27856197	81.79400597	125.9809475	192.9456488	292.8672992	440.4075011	652.5935898	941.7393267	1307.072937	1725.544477	2142.477018	2487.720571	2727.981467
Cs2As3_mp-15557	9.943016442	6.273389948	4.560679144	4.564613044	5.737327758	7.697955329	10.22010851	13.60172049	18.73562549	26.93413553	40.08873237	61.22478551	94.86575926	146.8077053	224.2837686	337.9146763	503.5213964	739.7749488	1061.912894	1473.223697	1948.529677	2418.992835	2806.778002	3091.595624
HfSe3_mp-15622	15.4758496	9.131052257	5.679843562	4.646851577	4.813983774	5.630664308	7.018068006	9.312212578	13.12631026	19.17382243	28.3201216	42.04842655	62.97747109	95.07898694	144.0303107	218.1324694	328.4558439	486.1557993	698.1071317	963.0563405	1263.765504	1558.601968	1802.164757	1984.878953
As2Ir_mp-15649	18.45029499	10.98292907	6.538613649	4.972979395	4.794229811	5.279910558	6.271542924	8.061955163	11.24138314	16.49034078	24.46762133	36.10100076	53.22544224	79.10607702	118.7819476	179.3421981	269.3574435	396.6908247	566.3177663	779.1402557	1025.7372	1275.904302	1490.528989	1657.654732
Sc4C3_mp-15661	15.09592935	9.502176066	6.150400842	5.084734906	5.232164902	6.072147831	7.546443327	9.986323452	13.98137009	20.29748691	30.11058489	45.55463571	69.99607421	107.7011323	163.8542035	246.2235733	366.7998765	539.6898319	775.3298105	1074.054206	1417.07872	1759.323555	2051.239333	2275.203758
CaC2_mp-1575	18.15806429	9.917083854	5.564352667	4.140250839	4.275641629	5.445537309	7.524231603	10.63807875	15.25661749	22.19124359	32.68554747	48.86663162	74.21832722	113.5806933	173.1074365	261.509857	391.925754	580.4066778	838.7851534	1165.566164	1537.996583	1907.315345	2215.011291	2433.824604
Rb3Sb_mp-16319	6.894424775	5.013615232	4.320967682	4.989231337	6.869061355	9.691488682	13.23116099	17.79235377	24.32176601	34.41424506	50.91561705	78.83318737	125.2553754	197.4873936	302.1876235	450.0875429	662.1963624	967.686662	1392.763902	1945.367959	2592.298522	3239.857147	3773.686476	4132.11756
CaS_mp-1672	11.76054878	6.990313108	4.494047463	3.81947746	4.425750617	6.150152895	8.94717996	12.87129574	18.38187985	26.46734362	38.76377661	58.07465907	88.94979252	137.6865772	212.1694291	323.3780511	488.079818	727.1356499	1055.499509	1469.514151	1938.595135	2401.059173	2778.677125	3024.549079
ZrSe3_mp-1683	14.35617065	8.635446289	5.509121518	4.632262544	4.934263349	5.928492329	7.560207651	10.18124232	14.43058468	21.07492792	31.13311637	46.42721252	70.07691564	106.5867129	162.1569356	245.9001256	370.401527	548.8194222	789.3096824	1089.577276	1427.904931	1755.331127	2020.352837	2211.539175
Ba2Sb3_mp-16922	9.851807117	6.386010322	4.660092456	4.533797677	5.417276887	6.9577685	9.095854911	12.22469096	17.10496263	24.73008738	36.56929174	55.17872065	84.51971973	129.6687662	197.0400291	296.3904323	442.4464379	652.1753496	938.3809488	1302.51515	1721.836051	2136.624264	2477.712863	2719.53086
Sb2O5_mp-1705	20.92692904	12.30425308	6.928872339	4.901581137	4.456681158	4.827581683	5.901678952	7.976295923	11.58229849	17.28050013	25.65727783	37.82523968	56.04406642	83.99247234	127.0503236	192.9856325	291.9165736	433.6784519	623.5139711	858.4793287	1121.281524	1374.146057	1576.928337	1720.459126
K2S5_mp-17146	13.59918589	7.820083515	4.87027273	4.152208262	4.843237821	6.659958413	9.491023184	13.44369033	19.12256181	27.65206642	40.77246668	61.39452492	94.22014204	145.8370919	224.7448852	342.8143733	517.3065711	768.7178925	1112.034354	1544.970313	2034.672528	2508.703488	2883.203871	3126.018586
Rh2O3_mp-1716	17.70253913	11.82581427	7.239054323	5.2777514	4.74057164	5.004568018	6.035705107	8.206255578	12.1127711	18.33003088	27.37937811	40.3316376	59.55260151	88.99565364	134.478107	204.3440737	309.20587	458.8795375	658.0468024	903.4777099	1178.057047	1442.607143	1651.908122	1788.710451
KO3_mp-1726	19.18421277	11.12298305	6.55046856	5.012879198	4.941771232	5.663949015	7.063206876	9.42502492	13.30707346	19.43121045	28.84556782	43.44231922	66.34438322	101.8123312	155.3650421	235.090063	352.7612666	521.5567572	750.2883581	1036.883857	1359.739967	1672.527166	1928.757356	2119.400162
PrS2_mp-17329	11.77029519	7.876573831	5.434104706	4.752809649	5.114324418	6.164988345	7.956889795	10.92868294	15.75701198	23.19989409	34.33087282	51.27189016	77.71962515	118.8844219	181.7500361	276.6258964	418.0577283	621.3372547	895.3162143	1235.63544	1615.177902	1975.965648	2255.804518	2432.977032
NO2_mp-1771	37.68909507	21.28958595	11.19396319	7.055554493	6.038359276	6.663529038	8.47373723	11.51663558	16.19486416	23.19051171	33.58269882	49.39228434	74.13657473	112.7910067	171.5643045	259.0894182	388.6804182	576.8045018	834.0267586	1153.775013	1507.408253	1844.637543	2104.643917	2250.790731
YbTe_mp-1779	14.10638598	8.598039078	5.604684833	4.78345379	5.124382632	6.014444014	7.223258831	9.058451672	12.26297749	17.77196693	26.57927961	39.90900186	59.78946441	89.7187586	135.1891161	204.0723277	306.1375979	450.9096419	645.3486808	892.0436643	1181.107499	1476.478076	1728.030034	1917.441778
As2O5_mp-1788	26.57514724	14.49760042	7.527155984	5.011231791	4.496741306	4.983898482	6.264653196	8.584544998	12.48176767	18.57865924	27.53308892	40.50957579	59.87300718	89.56390216	135.3701735	205.5543451	310.9436782	462.5264449	666.8086345	921.1068472	1206.438415	1480.879996	1698.016549	1845.55023
RbO3_mp-1806	20.67408498	11.73821537	6.792901082	5.154870902	5.085444696	5.838203305	7.249819294	9.590273285	13.44613632	19.59867997	29.13614496	43.92452999	67.03374091	102.7493756	156.716774	237.0668292	355.2992697	524.0944652	752.1003313	1037.927699	1361.098788	1675.529265	1933.680764	2127.118933
SbO2_mp-1819	29.00309795	16.22904818	8.599590731	5.690080104	5.037400665	5.504080441	6.766630615	8.981701972	12.64664238	18.41661737	27.04249277	39.75052773	58.87112755	88.20663284	133.2309923	201.6559552	303.7354427	450.2421062	647.8234244	894.342053	1173.228866	1446.738467	1667.399943	1813.905495
Ga7Te10_mp-18388	14.92043557	8.533723127	5.343331211	4.550346316	4.993601166	6.124382211	7.779051841	10.25341712	14.24042234	20.64044445	30.57548232	45.78692718	69.13991922	104.896543	159.1091681	240.5923964	361.2140709	533.4199255	765.8643056	1058.701256	1393.618861	1723.741553	1997.528862	2206.496822
Sr3P14_mp-1853	16.65579597	9.175024783	5.357128909	4.256454543	4.636419739	6.028971557	8.299165747	11.61417197	16.56596198	24.09999215	35.551342	53.12132871	80.47089284	122.9337009	187.707976	285.0270406	429.3842542	637.3205302	920.52364	1277.183001	1681.48247	2075.590831	2393.175632	2611.791278
SnS_mp-1876	15.14683284	8.669656038	5.317033961	4.412472142	4.783440175	5.923158847	7.721305424	10.48218266	14.87643078	21.75969524	32.20058149	47.96427205	72.1041202	109.251805	165.9974059	251.8898722	379.7512828	562.9162445	810.075226	1119.784026	1470.438399	1811.114586	2087.269945	2289.107369
RbGe_mp-1888	8.777746398	5.44463969	3.972893435	4.094585279	5.426471902	7.704310546	10.63809095	14.39057916	19.87255161	28.58646908	42.72285668	65.69034935	102.5015267	159.5405996	244.6394506	369.0764971	549.7992454	807.5448392	1160.437536	1614.246443	2143.421964	2673.388293	3117.162959	3451.036758
MnO_mp-19006	13.06138673	9.227940359	6.183541076	4.921801785	4.721779973	5.215970366	6.485889308	8.946447411	13.16282049	19.66180816	29.12801794	43.14005277	64.66549449	97.9562224	148.7775766	225.8112428	341.4288016	508.4190224	733.3270661	1011.010159	1318.776969	1611.204701	1838.795901	1978.758614
Cu3N_mp-1933	14.18057422	10.0085247	6.560934382	5.186947652	5.07633197	5.735942727	7.162992187	9.808587016	14.45391583	21.96131434	33.17634622	49.50134074	73.83081503	111.0908498	168.5490932	256.3207098	386.9547184	572.5223488	820.9321021	1132.906594	1491.523017	1846.086525	2129.364256	2309.559428
WO3_mp-19390	29.05299519	15.82386466	8.185710233	5.362011808	4.609904317	4.794923644	5.651962736	7.387580066	10.47779424	15.47560828	22.94393361	33.8043891	49.9112293	74.40035274	111.9371121	169.1459946	254.4304466	375.8997456	538.276255	740.4045018	969.9294677	1196.782343	1386.830113	1532.41167
SrS2_mp-1950	13.57188817	7.867964198	4.920159396	4.211347113	4.829542919	6.400176959	8.796992097	12.24021819	17.43205923	25.44209404	37.73982025	56.70886039	86.29420622	132.2795912	202.5697641	308.3827905	465.2240403	690.3521488	996.1680448	1381.74003	1819.5578	2244.146877	2581.32717	2809.864861
P3N5_mp-1954	29.09239221	17.16778894	9.226936093	5.870099202	5.004943605	5.461947252	6.895243767	9.412111128	13.43189557	19.56684747	28.66192365	42.26415815	63.19576479	95.67275382	145.2409955	219.660945	330.3796919	491.0791479	710.9010637	986.4021148	1296.788165	1600.628898	1843.226566	1988.871727
SrTe_mp-1958	11.31115086	6.641943547	4.453487811	4.083971252	4.912769717	6.591107768	8.832580645	11.7451865	16.10130322	23.15888677	34.55378579	52.58663533	80.74644847	124.106109	189.7499228	287.934107	433.0256699	641.2177815	924.4354657	1283.253868	1696.694066	2110.204708	2453.078404	2695.072547
TePb_mp-19717	13.3321156	7.919455214	5.190827771	4.570913065	5.039533971	6.002169972	7.248572764	9.108283384	12.31436812	17.76018136	26.41579296	39.55103123	59.25561529	88.9840336	134.0780496	202.2933575	303.4144511	447.077994	640.3827844	885.7219632	1171.831655	1461.003353	1706.121337	1897.180569
InS_mp-19795	15.52145984	8.641852902	5.198120131	4.280138297	4.724535308	6.04265465	8.065448006	11.00697509	15.53802678	22.62157442	33.46463994	49.9185147	75.10120062	113.7971351	172.8431183	262.0564247	394.6630226	584.7759837	842.0206154	1165.449536	1533.524833	1894.258381	2188.001124	2399.067911
Mg3As2_mp-1990	13.56982381	7.590976139	4.672462797	4.001794841	4.621298915	6.151791496	8.439733362	11.6579763	16.46369323	23.91927784	35.55275546	53.81242383	82.54100744	127.0273405	194.1520232	293.740127	440.0089167	649.6653448	935.8759778	1300.122111	1719.635221	2136.943036	2486.776132	2751.59915
Pb2O3_mp-20078	21.67511173	12.25650363	6.910727114	5.018914908	4.690859705	5.093916333	6.036755094	7.767643272	10.81164682	15.78974148	23.36235278	34.54140078	51.23070586	76.60289813	115.3920791	174.3133118	261.8048218	385.9978593	552.0678244	760.1975248	999.5466718	1239.932786	1445.384867	1607.558573
RuS2_mp-2030	15.04941457	9.714833691	6.177560912	4.938458447	4.957001525	5.728379418	7.245086106	9.919646019	14.43917456	21.55216428	32.11450613	47.71327073	71.37570293	107.8381557	163.8701881	249.2036075	376.6128071	558.709187	802.6219246	1105.318593	1444.734432	1770.285771	2025.794162	2193.875737
InAs_mp-20305	13.83049376	8.22950719	5.323845587	4.561760269	4.909751596	5.911076397	7.526423201	10.09392574	14.19564097	20.53847511	30.1635379	44.99768885	68.17102297	103.8452638	157.4451327	237.2183238	355.3364025	525.2427087	755.851876	1045.949314	1376.233656	1702.57188	1977.847354	2188.31576
InSe_mp-20485	13.61738769	8.051379418	5.197911985	4.490698878	4.911859918	6.000634253	7.693346421	10.32801353	14.53441344	21.0889896	31.06687096	46.37322036	70.1477004	106.7458113	162.0384799	244.8055205	367.5585114	543.8099047	782.4913073	1082.364344	1423.017059	1757.043869	2034.220399	2243.043717
PbS_mp-20526	17.88370951	9.694748464	5.920042306	4.89188459	5.36789003	6.75920569	8.751873223	11.4841121	15.7063011	22.58100535	33.53334969	50.4854819	76.41595091	115.8844243	175.577538	265.4291447	399.3317971	592.4293862	854.2890637	1181.805353	1552.025528	1914.658277	2207.601873	2405.597385
Li3Sb_mp-2074	13.8996667	8.189524541	5.292645119	4.636870519	5.212725381	6.512367234	8.340423967	10.92800806	14.9382198	21.39124574	31.86825944	48.98860025	76.61071999	119.3547393	182.4267679	273.4368055	404.7284015	592.1960405	850.1095269	1183.784513	1577.252635	1982.630311	2344.775264	2647.868867
Rb2P3_mp-2079	11.52323077	6.85286666	4.606870623	4.315395461	5.280301942	7.153442928	9.7272117	13.20207805	18.3672984	26.49768999	39.48965272	60.40479966	93.89065115	146.0024615	224.2361231	339.2936044	507.084663	746.7348649	1073.896315	1491.126052	1971.590783	2446.000275	2837.728258	3128.578179
YN_mp-2114	14.28245793	9.19518038	6.057992915	5.026525176	5.121814372	5.874549313	7.27524544	9.676321678	13.63393746	19.81385124	29.23794203	43.86532208	66.88063519	102.3980768	155.5464563	234.072358	349.6989	515.6621139	740.821175	1023.944874	1346.270101	1665.166296	1933.66605	2132.880122
RhF3_mp-21208	24.33344105	14.8194075	8.302277314	5.612554788	4.754013458	4.806246495	5.608460341	7.424944288	10.73179696	16.02057156	23.81349037	35.16923663	52.24975787	78.50941713	118.9350006	180.7440057	273.3405059	405.5697823	581.2965265	796.2216387	1033.235954	1257.980693	1435.260153	1556.695926
KO2_mp-21325	15.47930311	9.714552921	6.287157984	5.11411998	5.090830254	5.705708543	6.913543033	8.986518632	12.3574139	17.60186066	25.76592697	38.8971171	60.15401874	93.24587415	142.327533	213.9066836	318.8971725	470.4874909	677.5800599	937.9960202	1232.388761	1522.067255	1768.241765	1956.223344
Sb2O3_mp-2136	26.60008038	14.63377398	7.956320466	5.511197887	5.156064936	5.927173284	7.535037187	10.12403154	14.21557827	20.55128065	30.0436469	44.17135352	65.60496668	98.55107347	148.9631928	225.3173346	339.2704818	503.4953957	725.7825757	1002.847053	1314.664698	1618.848353	1862.855894	2022.102737
BaGe2_mp-2139	12.09144303	7.377162063	5.029007954	4.637255274	5.377625432	6.800810783	8.76706077	11.60211058	16.04647818	23.11108212	34.23918816	51.81476196	79.50028703	122.0756125	185.6319967	279.2106059	416.1557821	611.8289149	878.1804516	1217.307677	1609.45495	2001.605608	2334.069702	2590.861714
Pb3O4_mp-21452	22.79436112	12.64077976	7.099131885	5.18889033	4.898103329	5.343929839	6.299931782	8.005965709	11.00640448	15.9723239	23.64880525	35.13391254	52.38093972	78.57262525	118.4288805	178.6619857	267.7890431	394.1611444	563.2473617	775.3407888	1019.25037	1264.007392	1473.078924	1638.999763
KGe_mp-2146	9.231577448	5.736041922	4.151683673	4.222518685	5.527729295	7.809017322	10.81741729	14.72516264	20.40281874	29.32546269	43.76443802	67.40190607	105.6750708	165.2978902	254.1173799	383.4158822	570.8078592	838.4572806	1205.686981	1677.74048	2226.201495	2772.88639	3229.419914	3571.450049
BaTe2_mp-2150	10.46655765	6.64067708	4.702471583	4.449040992	5.205891288	6.584311061	8.506513818	11.34953009	15.85559296	22.9714154	34.00811193	51.18392379	78.0288527	119.3379997	181.4928343	274.041126	410.7159247	606.7331688	873.2165433	1211.02821	1598.680978	1980.058792	2291.301095	2513.165263
Sb2Se3_mp-2160	15.32065922	8.876146441	5.522034331	4.618365703	4.974436584	6.045283148	7.706588843	10.27869753	14.44368241	21.05184082	31.14223833	46.40071077	69.74166062	105.6272285	160.4756395	243.5908083	367.2880105	544.0473933	781.6788882	1078.454404	1413.450788	1737.303952	1997.430237	2185.53684
SnSe_mp-2168	13.93736355	8.208153064	5.211694803	4.423284139	4.784528005	5.818548472	7.455393115	10.03503236	14.20212974	20.72962198	30.59650249	45.49323054	68.33651546	103.4460119	156.9149091	237.7143724	358.0571933	530.5816311	763.3151094	1054.820977	1385.245064	1707.72024	1972.084649	2168.211339
AlAs_mp-2172	16.66391646	9.06916249	5.27717253	4.203158064	4.561989546	5.853401499	7.919039343	10.93475005	15.50559071	22.56086287	33.35798066	49.90081717	75.49015012	114.9600668	174.9222494	264.8384471	397.9666655	589.2171665	849.2618971	1177.364252	1551.558834	1920.279871	2224.399146	2446.302683
Si3Ru2_mp-22192	13.17793335	8.579742762	5.598298279	4.614399365	4.751288599	5.591024098	7.15946377	9.873361348	14.39894989	21.45129436	31.88486639	47.33114464	70.81808668	106.9098958	162.0055267	245.4520489	369.9519367	548.6468118	789.9315001	1092.858084	1438.447732	1779.507081	2060.743991	2260.3046
InN_mp-22205	17.832477	10.48450125	6.310430739	4.886686828	4.773840599	5.349406421	6.532628444	8.62216754	12.13436224	17.67412955	26.06303774	38.8140713	58.49617594	88.69879794	134.2285131	202.2138417	302.7526463	446.6270925	640.7738543	884.2090986	1161.762903	1438.152657	1675.452128	1863.567947
ZnO_mp-2229	18.06664233	12.64596979	7.792863211	5.625463319	5.038566256	5.346205935	6.475819545	8.826330242	13.1100462	20.08047738	30.37529937	45.07475068	66.69473899	99.77561583	151.1723907	230.409964	349.0499281	517.6499942	742.0236272	1020.453709	1334.807891	1637.273745	1867.457926	1999.635782
Er2S3_mp-2234	16.08646093	9.731844145	6.024696643	4.85437256	5.057284311	6.03993695	7.632690698	10.12576888	14.22691216	20.85394305	31.04854941	46.34560565	69.47104984	104.876287	159.1244246	241.4606076	363.6731384	537.6243905	771.3745519	1065.316445	1402.673285	1736.713029	2008.506084	2197.1914
In2S3_mp-22375	14.2751881	8.584825547	5.477838715	4.607958827	4.920289781	5.945411561	7.638440886	10.34555676	14.68927601	21.42966548	31.63530766	47.26275275	71.59767226	109.2229344	166.2706222	251.8173783	378.7704171	561.019782	807.3389458	1115.183014	1461.697872	1796.938003	2069.393998	2267.24748
In2O3_mp-22598	21.24770463	12.19967422	6.918380061	5.037976082	4.742664317	5.247275671	6.402985403	8.490411595	12.06494977	17.78127096	26.39672196	39.19844743	58.55442801	88.1700946	133.3496613	201.6857675	303.1365161	447.6927594	641.4722375	883.1574935	1157.087581	1425.963449	1648.822461	1816.692724
MoCl3_mp-22853	14.63989942	9.295393253	6.03808792	4.92021483	4.923160258	5.589504126	6.924820982	9.257836837	13.0682399	18.90968291	27.71479592	41.42002917	63.23996738	97.35363805	148.9970494	226.1180524	340.729992	505.9465985	728.8458175	1003.950205	1307.517761	1595.317799	1824.070447	1979.511444
Bi2S3_mp-22856	19.25351698	10.76615264	6.332223722	4.960914095	5.089356604	5.995176472	7.441534516	9.670457449	13.34090467	19.3160994	28.57239204	42.50287013	63.52586193	95.59975755	144.6501572	219.1585709	330.02109	488.1152374	700.3965493	966.1280518	1268.808091	1566.364977	1809.106448	1984.700374
CrCl2_mp-22857	16.4093698	9.911609721	6.172541298	5.02843877	5.253364148	6.285521318	8.036590835	10.8477134	15.39260906	22.53589399	33.47726531	50.34380359	76.73466399	117.7899105	180.4008099	274.4573691	413.6619587	612.6682239	880.7819236	1214.955229	1589.037666	1945.88315	2226.479349	2418.309679
TlI_mp-22858	18.19692478	10.2791617	6.539576092	5.443957262	5.735116678	6.668452888	7.878441732	9.608517744	12.65783618	18.11781254	27.23900909	41.5214616	63.16098328	95.70966566	144.7473478	218.6607866	328.7174232	486.5582961	699.4273259	966.2057711	1272.076267	1579.256621	1835.380228	2015.490162
CuI_mp-22863	14.56623956	9.116058835	5.853374269	4.86194938	5.181845165	6.278362502	7.987818276	10.6198464	14.93956058	21.94004591	32.71948005	48.84611977	73.13375487	110.2880549	167.3425548	254.1684225	383.1726822	566.6527468	812.9410298	1122.757609	1479.220746	1833.032101	2119.115197	2310.941892
TlBr_mp-22875	19.91078669	11.23215392	6.944194487	5.55835586	5.690848295	6.570941397	7.841489322	9.700061324	12.87292527	18.38106965	27.41343298	41.47345768	62.85543686	95.20614748	144.0491676	217.5473025	326.7500139	483.2372633	694.1594731	957.9569124	1259.515796	1562.071669	1815.006682	1992.894468
CsI3_mp-22876	12.0169606	7.095501966	4.833660245	4.512722676	5.480815652	7.335186608	9.732881698	12.81730154	17.48395491	25.121839	37.45110171	56.81130098	86.81224276	132.9867947	203.4635945	310.1194461	469.0818978	697.6615704	1007.5234	1397.084782	1839.948788	2271.462437	2610.757122	2827.203976
FeBr2_mp-22880	14.09276969	9.011028218	5.955172338	5.055486832	5.347849573	6.358877722	8.068353399	10.88298559	15.49653448	22.72664806	33.6793213	50.39619763	76.42165743	116.8797171	178.7584107	272.1918241	411.0091318	609.3209324	875.0161602	1203.566737	1568.333083	1912.589841	2177.493171	2348.52158
ZnCl2_mp-22889	12.56174529	8.345886457	5.623913756	4.682553589	4.73919552	5.442437738	6.854338733	9.326678463	13.32092577	19.33022197	28.24806229	42.07936364	64.23032403	99.17012059	152.537001	232.9234217	353.3575883	528.0015018	764.0483564	1054.526425	1373.017544	1672.037732	1904.412432	2050.636543
AgI_mp-22894	12.21556147	7.67492736	5.160429374	4.5986445	5.223528551	6.578502147	8.491851095	11.29637303	15.83786127	23.21214501	34.62473733	51.7530046	77.54845096	116.9670684	177.5325605	269.9135239	407.4588312	603.2346934	866.1242072	1197.121804	1577.837341	1954.043152	2256.213632	2460.244111
CuI_mp-22895	13.77056551	8.831472709	5.817768962	4.957974765	5.343634831	6.461059279	8.192063058	10.91281783	15.42825066	22.73711093	33.95522105	50.76065528	76.190496	115.2398776	175.3060848	266.7631781	402.5621795	595.2937896	853.2839705	1176.895946	1547.221967	1910.63769	2200.337372	2393.721967
AgI_mp-22915	10.2344006	7.13867704	5.189406046	4.805349777	5.423300481	6.709720677	8.710492227	11.9430078	17.26060708	25.60700333	38.09753699	56.74405075	85.26927932	129.4652066	197.6655684	301.8588405	457.5800946	679.9062466	977.5893211	1348.155137	1765.689207	2165.437295	2471.27321	2655.618059
CuBr_mp-22917	14.60248117	9.466933762	6.154017916	5.105416447	5.348629539	6.365527555	8.090521955	10.93188693	15.67440823	23.25658002	34.75039806	51.9144613	78.0065634	118.2688298	180.3083183	274.802188	415.2649408	614.8863545	881.8726272	1215.015958	1592.41692	1957.561339	2243.384802	2428.084093
AgI_mp-22925	12.85684963	7.959334269	5.268099501	4.596045511	5.150055695	6.463811097	8.338717346	11.05885865	15.43821939	22.5698257	33.65602885	50.31023319	75.32899873	113.4384141	171.8484819	260.8283467	393.3896182	582.4937316	836.910883	1157.401757	1526.746026	1894.420761	2192.579367	2392.880379
Tm2S3_mp-2309	15.12856334	9.356820777	5.918648772	4.861210122	5.101506	6.080825201	7.672526297	10.21584855	14.44101084	21.25493199	31.67980305	47.2757937	70.860502	107.0189572	162.4989614	246.8161812	372.0261046	550.045235	788.7754541	1088.350343	1431.032054	1768.109264	2040.247327	2228.866644
CdO2_mp-2310	24.54224447	15.14894766	8.524670392	5.832277707	5.104056782	5.347055133	6.341897578	8.364469498	12.00304042	17.94625753	26.88840576	39.94316441	59.38142016	89.09698347	134.857771	204.6809554	308.5114317	455.8366364	652.3008594	896.8087211	1174.121931	1444.726718	1660.021918	1802.342376
ZrCl2_mp-23162	16.38582784	9.875171779	6.169195171	5.062065636	5.329227909	6.39737563	8.158824238	10.95463223	15.48685209	22.6595541	33.67982138	50.61300946	76.95897251	117.8121528	180.1228851	273.8242197	412.4072069	610.0174222	875.533213	1206.044244	1575.974284	1928.389664	2203.920274	2390.936828
HgI2_mp-23173	22.07241167	12.60161626	7.875991743	6.261051632	6.334066402	7.286092482	8.761887304	11.00423923	14.84535868	21.44967542	32.10602983	48.35976851	72.65914355	109.1547205	164.3667553	248.026379	373.266884	553.6088808	796.5315029	1098.185773	1438.993732	1775.172443	2045.068946	2212.937755
HgI2_mp-23192	17.53734668	10.14804944	6.363252887	5.264871037	5.573194471	6.581814436	7.999318329	10.10604484	13.69482921	19.79487387	29.48639228	44.0746516	65.75791682	98.42973094	148.3198651	224.5031473	338.435971	501.2065841	719.6755097	993.369763	1306.770672	1617.073118	1868.019433	2039.09944
Bi2O3_mp-23195	29.40024353	15.85639603	8.434932566	5.746555849	5.136043169	5.445612543	6.337160204	7.98559346	10.90139381	15.73821755	23.19882925	34.276975	50.78840098	75.80737012	113.9621255	171.8100049	257.6528868	379.6087268	542.6495754	746.1749917	978.8404554	1211.203768	1406.896612	1555.100446
FeCl3_mp-23204	12.90109258	8.521793645	5.705780127	4.712636561	4.72538697	5.375841332	6.712592936	9.067696471	12.88125295	18.63913121	27.23631541	40.64264972	62.13329202	95.8855469	147.039064	223.5124784	337.598207	502.8774702	726.3592568	1001.361021	1302.593294	1585.365659	1806.242458	1947.98228
AsI3_mp-23218	20.17883495	11.29724301	6.934732963	5.65486675	6.081847146	7.531334898	9.66361541	12.64055699	17.25295727	24.68930198	36.38452951	54.34115988	81.84575708	124.1184937	188.8859689	287.4183801	435.0038081	647.6857265	934.6089279	1290.276831	1686.698168	2065.277083	2355.079915	2527.741411
Bi2O3_mp-23262	35.11538257	19.25095202	10.22936975	6.699849244	5.720002992	5.873382954	6.687757773	8.262352221	11.07100538	15.76833528	23.09419367	34.09180308	50.5988402	75.63254337	113.6206524	170.8448033	255.5836038	376.339218	538.1646704	739.6113759	969.2615099	1199.896542	1394.641119	1535.11003
TiI3_mp-23264	12.57871489	7.843370102	5.275471479	4.627071909	5.021691183	6.052982778	7.719584552	10.39434211	14.67846317	21.28800071	31.30993556	46.82776137	71.27925279	109.2745486	166.8277044	253.0098917	381.0618176	565.2136883	813.7984757	1122.707726	1466.986431	1794.800237	2052.919231	2226.192925
GdCl3_mp-23265	19.32030068	11.41507921	6.843285078	5.298063474	5.43613694	6.598784354	8.565887766	11.54179757	16.19230427	23.47980911	34.61293826	51.49153048	77.43709358	117.6544283	179.5246382	273.4169631	413.2142032	613.7529365	884.6139441	1223.250331	1605.732879	1976.377732	2265.501908	2442.538682
TeI_mp-23273	13.72650218	8.010026467	5.159344892	4.524481298	5.078120336	6.307835432	8.058953527	10.65746177	14.84405967	21.54788525	31.86853891	47.50100872	71.35927247	108.0242852	164.2685709	249.9500846	377.917069	560.9509904	806.9938422	1114.288712	1460.62158	1792.624538	2053.26695	2235.073569
Li3N_mp-2341	16.32183711	9.351734604	5.490062008	4.285488156	4.471732778	5.501855069	7.22247719	9.835033136	13.93315636	20.45534282	30.8036272	47.27560783	73.41527885	113.8362627	174.1191938	262.1696753	390.1349262	573.3660065	825.2850524	1149.794229	1529.547353	1915.728917	2249.640992	2510.039303
Ga2Te5_mp-2371	15.04188759	8.630180537	5.401580512	4.588454729	5.023932578	6.142881918	7.764715924	10.1832516	14.10700736	20.45254021	30.32063046	45.36370773	68.33412421	103.4622478	156.89295	237.5268412	357.097523	527.6553697	757.4591382	1046.625024	1377.164078	1702.244811	1969.41731	2169.656215
MgH2_mp-23712	26.15178714	12.21759132	5.791367367	3.735271452	3.482267276	4.188600005	5.685718067	8.102446527	11.81012468	17.36833617	25.58023085	37.84005222	56.46600863	84.66632924	126.586655	188.3700321	279.5000463	411.5699471	593.2054481	823.9293626	1089.35971	1359.457469	1601.272486	1805.04615
SrH2_mp-23759	26.67473685	12.11973315	5.8515544	3.963448636	3.800241888	4.496139645	5.821372068	7.885746759	11.0952627	16.06727387	23.65565695	35.23002724	52.95078701	79.76621906	119.5337073	177.9659926	263.5860453	386.4703965	554.4076913	768.4820444	1017.927821	1276.743659	1517.859698	1740.215392
CuH_mp-24093	24.17375572	15.64968301	8.893428651	5.893690724	4.82424215	4.720373945	5.389836217	7.091780359	10.33661484	15.67881189	23.63495328	35.10458315	51.98544375	77.43040849	116.0316686	174.3365234	260.7494023	383.4353828	547.4495899	752.9033969	989.7134112	1229.231205	1434.779006	1589.516446
LiP5_mp-2412	15.72797836	8.616882938	4.985235885	3.949721446	4.248736914	5.426085521	7.418571375	10.49235642	15.24396988	22.48295661	33.31821277	49.70060667	74.99183994	114.1229305	173.8576742	264.0168856	398.4769792	592.8496776	858.3612323	1194.19112	1576.393411	1949.858448	2255.517911	2479.792359
SrB6_mp-242	16.31673924	10.11328409	6.272709576	4.772573497	4.422432175	4.699703474	5.557852486	7.213315517	9.979874309	14.23582537	20.69454758	30.84899613	47.0355336	71.98168821	108.812376	162.6520307	242.2309282	358.1765349	517.981233	721.2659388	956.0558439	1196.703508	1415.224046	1596.251391
CdS_mp-2469	14.04783243	8.946137109	5.812664045	4.891241918	5.242083533	6.377849102	8.223485014	11.1680624	15.99665319	23.67241316	35.32225033	52.78613366	79.41384711	120.5418194	183.8853417	280.3071288	423.7053558	627.9189461	901.8988319	1244.834974	1634.36351	2012.430801	2310.227907	2505.779602
OsSe2_mp-2480	17.3094554	10.89994897	6.776720076	5.250325399	5.007798941	5.41182404	6.396722079	8.31226347	11.73961942	17.3033829	25.65642003	37.91584373	56.26779991	84.29921494	127.3082778	192.8336031	290.2592811	428.1666561	611.2275942	838.4733943	1097.047406	1352.761056	1564.857483	1720.81899
GaP_mp-2490	17.45086511	9.460754682	5.42212603	4.228291402	4.495953703	5.686423913	7.646440427	10.56493749	15.03316488	21.92654027	32.3981518	48.29400405	72.72014358	110.3128185	167.4996443	253.4882019	381.0501872	564.3439514	813.2816338	1126.899241	1484.260772	1836.452878	2127.288039	2339.961083
As2Pt_mp-2513	14.87151456	9.567865493	6.11645731	4.845545528	4.700181292	5.193536262	6.342804653	8.530257462	12.32095367	18.26364614	26.95940945	39.64368204	58.75822219	88.11140478	133.1851612	201.9944139	305.0446246	452.365347	649.2827091	893.9778119	1171.833662	1446.721314	1675.305431	1839.282486
V2O5_mp-25288	29.76875977	17.02791107	9.073153562	5.896719289	5.168113372	5.722495759	7.219328805	9.777816428	13.86039727	20.15110942	29.57980966	43.76964862	65.60750561	99.39773622	150.8564068	227.983661	342.3296407	507.3516956	731.9889887	1013.1597	1330.104838	1639.876851	1887.669302	2042.403569
Li2Te_mp-2530	12.67745354	7.197496941	4.467734376	3.693833746	4.155342821	5.569915965	7.795368468	10.85622387	15.21832691	21.84857028	32.26792613	48.91817518	75.53810221	117.0225904	179.2193316	270.3504912	403.5257994	595.6555537	859.923769	1196.301204	1584.903175	1981.599959	2328.160159	2589.329678
GaAs_mp-2534	14.67299656	8.772091226	5.568438892	4.585246152	4.716200979	5.494657118	6.902703848	9.252933561	13.03129179	18.80962634	27.50751805	40.95120034	62.10888424	94.79589266	143.82333	216.6282591	324.5916752	480.5165539	692.6102594	958.8883211	1261.0348	1560.077399	1815.18692	2011.946899
TeO3_mp-2552	25.41254853	14.28416595	7.571777938	5.077184955	4.507912204	4.886121763	6.006919028	8.120060634	11.7567476	17.5132759	25.98043306	38.18783722	56.30257069	84.03648257	126.9242215	192.8317459	291.8207708	433.7555436	624.3240571	861.3785841	1128.261246	1386.444109	1592.266162	1733.829431
Sr2Ge_mp-2576	9.629922861	6.304286477	4.726459255	4.78436106	5.971122486	7.928958704	10.49945361	14.0110168	19.29027504	27.57172397	40.83147035	62.45525558	97.42812657	151.5981858	231.5330229	347.1862432	514.8974447	755.1430594	1084.921685	1507.907859	1998.545338	2488.550142	2899.894169	3203.595452
NdN_mp-2599	14.08837659	9.573955251	6.411906819	5.280448655	5.282716702	5.943907997	7.278199831	9.706197687	13.88592909	20.54089486	30.56757024	45.63387863	68.75036514	104.3768834	158.6732329	240.5346513	361.889988	534.7645664	766.4436436	1055.544453	1383.73318	1705.238863	1965.804338	2143.149763
Mg3Sb2_mp-2646	11.96956027	7.626612621	5.309406201	4.813196376	5.349574338	6.516756847	8.273957596	10.94279609	15.08911441	21.49527667	31.52735018	47.73406736	73.95290005	114.6227087	174.6661218	261.8134891	389.1443963	572.9028769	825.486582	1147.671517	1519.231062	1892.202726	2213.309794	2458.904493
CsAu_mp-2667	8.866432277	5.571736708	3.983873471	3.769751823	4.43856572	5.576119642	6.913713342	8.701146479	11.73364378	17.10977449	26.09268643	40.16153619	61.38803604	93.03411523	140.1639016	210.2869344	313.360881	460.0661605	659.3073342	916.180811	1224.791847	1553.748283	1851.353219	2089.067072
Sb2Rh_mp-2682	10.91018699	7.401294882	5.169681532	4.500975333	4.751723325	5.644077899	7.309174593	10.21617687	14.97853737	22.17185198	32.61899689	48.19852682	72.30235887	109.6596308	166.6250129	252.8421886	382.1394443	568.8848912	820.929126	1134.229915	1485.940796	1826.070405	2096.114898	2265.32556
CdSe_mp-2691	12.59995383	8.355929083	5.71967329	4.994148262	5.373018629	6.427966428	8.16078462	11.01857821	15.7504234	23.20914159	34.46146307	51.43829838	77.60765832	118.2072236	180.6141427	275.4550936	416.7778364	618.5762893	889.1486163	1226.134327	1605.986496	1971.885367	2259.049345	2445.873284
CoAs2_mp-2715	11.79267525	8.172947408	5.64337633	4.779891525	4.906481682	5.700710914	7.268353486	10.06699172	14.72209512	21.84362609	32.26380851	47.81446051	71.83668882	109.0699746	165.9058022	251.8947309	380.5293321	565.6864986	814.6917625	1122.755276	1465.963935	1794.142812	2051.375007	2212.168537
B13H19_mp-27200	29.57457793	14.7974922	7.269216509	4.542456234	4.041726547	4.750726998	6.438647795	9.187130029	13.30653498	19.3394154	28.19024519	41.52471432	62.06653671	93.35530453	139.5388962	206.7327165	305.3537461	449.0873633	647.5295461	897.0502403	1177.819869	1456.804022	1696.741854	1877.044816
Au2O3_mp-27253	24.11766816	14.58214254	8.123015802	5.486892829	4.645434569	4.643936716	5.28923303	6.824723169	9.72668513	14.49912049	21.56136272	31.60098321	46.22867666	68.39932555	102.6554303	155.3563735	234.0926724	345.4962177	493.1087013	676.6505102	887.3598676	1099.588068	1280.761554	1419.835042
VF5_mp-27309	38.45503392	22.57193054	12.28494068	7.793305701	6.584437572	7.135955337	8.934145406	12.00944617	16.77197299	23.91171015	34.49680685	50.53839482	75.60436031	114.8219636	174.6260499	263.9046542	396.313545	588.7262239	851.6857246	1177.778682	1537.64831	1880.817326	2143.415198	2282.051712
TlP5_mp-27411	18.22112104	9.919397693	5.714358935	4.47521417	4.709775222	5.810682188	7.601824943	10.30334509	14.53716188	21.17603083	31.33817336	46.79709897	70.54155143	107.0682864	162.6878833	246.4523993	370.6936509	548.7457191	789.8599489	1093.292221	1438.757788	1777.795996	2056.362298	2262.100091
Tl2O_mp-27484	15.28989733	9.136638036	5.817235288	4.844786265	5.001729972	5.68567669	6.783489642	8.625705271	11.81585772	17.07152001	25.26109998	37.74360037	56.76479971	85.6359134	129.0416621	193.8263445	289.1321031	424.415048	606.6504326	837.9607112	1108.176968	1384.629232	1627.366396	1825.731061
Tl4S3_mp-2753	13.8518131	8.16305318	5.282652648	4.610509527	5.093363318	6.164408225	7.632460703	9.810148717	13.42035308	19.38500717	28.80436438	43.27233501	65.35305375	98.92142704	149.5812791	225.4609767	337.2858236	496.2047786	710.5667092	982.5245019	1298.318818	1616.232763	1886.576561	2098.926639
As4S3_mp-27543	19.87646588	10.79882045	6.260404325	4.863420638	5.201271638	6.733603263	9.284645132	12.96602686	18.34556096	26.39297957	38.48286767	56.87793179	85.39329269	129.6798641	197.4482623	299.7600836	452.4845825	673.630743	974.3455521	1348.491686	1764.786549	2162.750539	2472.666835	2665.284052
Bi4Se3_mp-27607	12.67146534	7.647238748	4.87781872	4.000568595	4.071061444	4.717137634	5.98845665	8.237678867	11.94906185	17.58470908	25.77449163	37.91290764	56.52731629	85.20719342	128.9182382	195.302039	295.2692771	440.1183325	636.1617125	880.6929129	1156.64248	1426.41597	1647.612588	1802.313412
Te3Cl2_mp-27628	17.41312807	9.774513432	5.883309529	4.804030845	5.175228823	6.384736085	8.225964648	10.95278302	15.2743379	22.14796756	32.72864787	48.77665522	73.32249864	111.1556202	169.2837571	257.7532304	389.7130706	578.5675969	832.791534	1150.257918	1507.744706	1850.803296	2119.443926	2302.01423
Te2I_mp-27655	13.32892	7.89621651	5.126084028	4.481590521	4.965319557	6.08887575	7.745645877	10.28025736	14.38933085	20.92161179	30.91506079	46.06215929	69.27431189	104.9952134	159.6624311	242.7105864	366.6650026	544.1401508	782.9325337	1081.186341	1417.350374	1740.407954	1996.215041	2176.48147
IrCl3_mp-27666	24.00411171	13.67454231	7.803286851	5.721862574	5.551347975	6.401319661	7.986811561	10.50875857	14.6011321	21.13831267	31.1569972	46.22965132	69.1424876	104.3735939	158.410011	240.4079995	362.4105486	536.8736764	771.4469109	1063.658025	1393.303665	1713.46914	1966.315487	2129.006558
LiP7_mp-27687	18.92649772	10.22098271	5.739446892	4.371836438	4.579831777	5.786193065	7.853664222	10.97803629	15.73484701	22.99456309	33.98539571	50.78721863	76.89935383	117.4053109	179.1390124	271.8276148	409.2636855	607.1807173	876.7475668	1216.302916	1600.928456	1975.106364	2277.289333	2489.61802
Bi6Br7_mp-27709	17.42765702	9.829282216	5.990019414	4.902947248	5.174227858	6.112078273	7.471913394	9.532190123	13.00394098	18.78083741	27.81143537	41.34517287	61.55964955	92.20683267	139.1574891	210.9019667	318.0894126	470.9243815	675.7487596	932.0775137	1224.424554	1511.524945	1744.447462	1913.132402
AuI_mp-27725	20.00458533	11.42314975	6.91447148	5.365593462	5.283837596	5.874989403	6.861923919	8.507781718	11.50084061	16.71899319	25.02540356	37.34079484	55.23726346	81.71717926	121.7744709	182.7528291	273.8996678	404.0836264	578.7347462	798.0380009	1052.204946	1311.381118	1531.814854	1692.403874
RhCl3_mp-27770	18.53686555	10.67455801	6.258644346	4.849074996	5.024634192	6.173706056	8.155605115	11.24384297	16.11513089	23.6675919	34.99708686	51.91905637	77.74216985	117.7288894	179.44301	273.5715732	414.1849108	615.8657364	887.7622672	1226.980507	1608.080828	1972.920883	2255.016471	2434.184285
B4H5_mp-27798	27.71063021	14.1621101	7.140681791	4.540948323	4.088841904	4.853917287	6.628689294	9.49344525	13.74916137	19.94267211	29.01620599	42.72255014	63.92213359	96.30181682	144.1090346	213.5773093	315.4975212	464.2442372	669.9047042	928.412677	1218.791051	1506.969142	1754.077679	1936.790421
CS14_mp-27814	20.20045042	11.35249827	6.708065835	5.172641572	5.527917967	7.330331894	10.49246282	15.07920743	21.50886002	30.67741309	44.14801111	64.79702316	97.4814776	149.048728	228.1912843	347.1054655	524.3765132	782.6705644	1136.268077	1575.494232	2059.41463	2516.989262	2865.921227	3061.680035
ZnP2_mp-2782	16.77629007	9.99308471	5.949520833	4.614572789	4.742909248	5.777051482	7.616505642	10.56557709	15.30363119	22.70736096	33.83035778	50.4185816	75.6588238	114.585833	174.3724284	265.1245841	400.2068684	593.7118309	855.2528014	1184.073453	1558.457673	1924.121087	2215.848923	2410.121106
Nb3Cl7_mp-27880	17.69948549	10.36456303	6.287730839	5.045006115	5.256107018	6.302213491	8.052861788	10.82583521	15.30803278	22.39171315	33.24858212	49.86120345	75.61838357	115.5317604	176.5156217	268.4250601	404.5322363	598.6856974	859.5802612	1184.439857	1548.447455	1896.176962	2169.62716	2357.991179
CdBr2_mp-27934	19.77520133	11.82719672	7.511050804	5.906389015	6.0400052	7.348330296	9.592026237	12.91939903	18.01218998	25.95420061	38.12413625	56.60360296	84.94277402	128.60593	195.1803205	295.5405293	445.359381	662.4379229	957.1229612	1322.563456	1731.285042	2131.198846	2449.343491	2633.053056
CuN3_mp-27954	26.67762016	14.81809559	7.800326405	5.225214849	4.696361204	5.191826856	6.474831505	8.771801365	12.63116428	18.75019365	27.94853923	41.5945244	62.21805365	93.80296058	141.9760844	214.6856926	322.5838253	477.0127724	685.5614056	947.1738625	1244.55084	1536.426385	1774.357038	1941.913238
CI4_mp-27962	17.46444574	9.634643563	5.808751081	4.806032156	5.24007839	6.487692832	8.322589963	11.00010164	15.24883457	22.04772728	32.56389595	48.53492327	72.91513183	110.3846164	167.8585611	255.3210765	385.8053534	572.4440547	823.3403575	1136.091531	1487.460889	1823.694714	2087.072979	2269.427933
SmBr3_mp-27976	21.24988493	12.5091769	7.892616531	6.192490208	6.299260875	7.570246306	9.707019632	12.83858708	17.66366464	25.30373146	37.19374564	55.46028424	83.6497358	127.1853597	193.6205318	293.8260734	443.4672809	660.2499924	954.2474588	1318.107744	1723.70912	2118.687553	2431.293278	2611.879293
LaI3_mp-27979	15.41239453	8.885361478	5.728610401	4.96190911	5.590484723	7.058840403	9.043884803	11.73588575	15.9631203	22.93430138	34.07572381	51.28438909	77.58072929	117.7953651	179.2083441	272.4704421	411.804473	612.0219751	882.4450785	1220.803465	1604.302498	1978.355303	2274.11394	2464.779588
SiP_mp-2798	17.81191098	9.523223617	5.360856883	4.129673886	4.428525057	5.771977406	8.064114797	11.48782495	16.59259997	24.23709004	35.65642723	52.9787571	79.8253063	121.4956348	185.1527946	281.0393776	423.7774324	630.1288861	911.7573567	1266.126418	1666.330282	2054.579331	2366.511578	2581.603406
IF7_mp-27988	40.16670052	20.89020715	10.20040633	6.347229244	5.349811579	5.622619592	6.754812991	8.909622609	12.58419016	18.40928829	27.12515895	40.01490195	59.52714548	89.60335837	135.9024088	206.4152453	311.6298199	462.1393956	663.6865172	912.0463589	1186.478164	1444.969852	1643.615827	1773.688589
Cu2P7_mp-28034	14.43954789	8.655916235	5.289534214	4.244380975	4.447707397	5.451732664	7.241457667	10.1830186	14.93904524	22.27707763	33.12874441	49.20716861	73.69756939	111.5212924	169.6771902	258.3135213	391.1805705	582.7615895	842.5267085	1168.771485	1538.248107	1896.627316	2183.98607	2383.269964
SCl_mp-28096	21.07731996	12.17679593	7.403783349	5.760402097	6.134901569	8.082897948	11.49203513	16.39046131	23.18859945	32.83922754	47.04936265	68.97615296	103.9537357	159.482914	244.9659388	373.4520919	565.0160892	844.4445746	1227.049818	1700.883116	2220.072989	2707.952194	3074.121072	3264.580685
SBr_mp-28099	21.01740282	11.58923729	6.793265497	5.316121183	5.710910847	7.410455577	10.221289	14.24978565	20.09207541	28.77981309	41.7995836	61.64785631	92.58397255	140.9652795	215.486554	328.5268077	497.6604825	742.6220013	1075.170001	1487.21942	1941.821939	2368.960412	2689.153402	2870.052661
In5Cl9_mp-28112	19.74291179	11.42619736	7.093265112	5.556387766	5.804389835	7.342666393	9.965163733	13.72719274	19.16732312	27.30874748	39.68031676	58.81577793	88.92871034	136.0740158	208.1050597	316.1480348	477.1065111	711.3611749	1031.235994	1427.778325	1866.992545	2290.81298	2625.409028	2821.069439
MoS2_mp-2815	16.8679059	9.678655077	5.728291326	4.516114307	4.750348294	5.880503857	7.780130913	10.72012199	15.36736335	22.614684	33.55819074	49.97169847	74.99911518	113.5496197	172.6262714	262.1770032	395.4425357	586.3772058	844.3108973	1167.971167	1535.328164	1893.324971	2180.569461	2378.657201
TiF2_mp-282	20.76136509	13.04378844	7.676115172	5.45516669	4.80439516	4.979906367	5.884576728	7.807058138	11.22791266	16.66091212	24.75068742	36.80439169	55.2469146	83.63935464	126.8752542	192.1764975	289.5246328	428.9869707	615.5664778	844.8973353	1098.163996	1338.453475	1528.618419	1658.576637
PtI3_mp-28268	12.73378613	7.876519603	5.176186568	4.439905605	4.740285407	5.63988966	7.127286799	9.599401968	13.71133089	20.16724966	29.76843907	43.9608824	65.46193226	98.57156187	149.6292968	227.9504573	345.6965314	514.5810456	741.0711432	1022.70898	1339.799708	1645.512267	1887.833409	2053.358893
RbI3_mp-28328	12.28854102	7.229514556	4.858034966	4.478450676	5.407928972	7.259424346	9.722906484	12.93743534	17.76074806	25.54003364	37.96804513	57.40934057	87.57066926	134.1086475	205.2374007	312.876136	473.2165034	703.698225	1016.097785	1408.660744	1854.23694	2287.192987	2626.778603	2843.509434
B6P_mp-28395	21.62863851	12.45150963	6.828040985	4.567528565	4.164632394	4.859103223	6.458028568	9.076689925	13.09617008	19.13175665	28.12584539	41.78342772	63.01642893	95.88562356	145.4206848	218.7145453	326.9562469	484.4140985	701.4936427	976.0533532	1288.921441	1602.180094	1865.69243	2044.901658
WBr6_mp-28483	18.37317425	10.24684491	6.110611061	4.932390967	5.214279103	6.296776757	7.992731275	10.59061214	14.78792433	21.4784362	31.72134749	47.1670854	70.71006979	106.9479292	162.6404813	247.5014706	374.1002307	554.8350811	796.91981	1097.350116	1433.304775	1753.33193	2003.500077	2177.219471
GaN_mp-2853	17.71331414	10.90882316	6.554625467	4.909863457	4.613301803	5.050511616	6.166063972	8.277614772	11.90583554	17.61482071	26.10736791	38.74748974	58.01523388	87.53538637	132.2836159	199.5913868	299.6249931	442.9575405	635.9702575	876.9044972	1149.881314	1418.941393	1644.759645	1814.515398
In7Cl9_mp-28730	17.52589024	9.803366393	5.878095739	4.712083687	5.112561843	6.574409851	8.897178028	12.21085493	17.14193406	24.70711062	36.26519232	53.93674327	81.26189499	123.574896	188.3074293	286.1133581	431.9237232	642.3434497	927.9923529	1284.853492	1685.934756	2074.288165	2381.512051	2578.631324
P2Se5_mp-28860	19.74507356	10.66312316	6.120200047	4.790777678	5.034048983	6.183844954	8.042552441	10.84031162	15.22749604	22.10614974	32.62667343	48.62760872	73.24186839	111.240629	169.38929	257.3826378	388.2411032	575.6404257	828.2907551	1143.57586	1497.665081	1837.599753	2107.323869	2297.474941
Br2O3_mp-28933	29.42027019	15.62427747	8.190017238	5.612685813	5.255327089	6.052307227	7.723597548	10.45739835	14.81235254	21.54806115	31.61612179	46.63275924	69.54412107	104.9726551	159.4681097	242.3155363	366.021083	543.7852819	783.4144286	1080.581398	1410.96409	1724.467011	1966.213638	2120.836663
In7Br9_mp-28988	15.53106661	8.676672318	5.313530412	4.469086728	4.995836281	6.380683308	8.415458288	11.32263576	15.82980898	22.9632318	33.95666698	50.62167748	76.01445953	114.9631507	174.5672576	265.071435	400.0110914	593.3735816	854.2142233	1180.830824	1550.517123	1909.11888	2195.056919	2393.952695
CsS_mp-29266	8.714256826	5.26558043	3.724661005	3.7181685	4.906895155	7.12279635	10.0952896	13.86290202	19.24128928	27.71809381	41.41208873	63.50175809	98.76116376	153.7099879	236.8439012	360.2218835	541.2607275	800.6612921	1155.250572	1607.84964	2130.846461	2650.170488	3074.935162	3372.45203
Sr4As3_mp-29424	10.36659802	6.564058264	4.70433204	4.585316446	5.608105307	7.405747325	9.826316279	13.19290696	18.32696569	26.41381853	39.21553813	59.66930571	92.23600999	142.5949108	217.7470284	328.0260094	489.0296938	719.1881613	1033.112464	1433.079538	1893.971991	2350.057969	2727.795955	3005.91791
WBr2_mp-29498	23.26696826	12.90734088	7.600019123	5.746342903	5.701381079	6.650320171	8.27198244	10.73490377	14.71378322	21.178279	31.22889024	46.34405429	69.030807	103.4140578	155.6916435	234.9567176	353.603889	524.6516554	755.4215645	1041.826314	1363.968907	1679.901804	1934.486296	2098.979927
B9H11_mp-29654	27.85831762	14.36337796	7.265890576	4.601905778	4.110289531	4.839528336	6.569223167	9.376907416	13.56501539	19.67955901	28.6544145	42.22340433	63.22004677	95.30029402	142.6687622	211.4827514	312.4163208	459.7193221	663.4099095	919.4833208	1207.235874	1493.016649	1738.038387	1918.362712
SiH_mp-29803	26.99297837	12.74628258	6.202060418	4.120186383	3.954010539	4.866270162	6.683022467	9.51860547	13.75836507	20.0316154	29.29293041	43.21790212	64.57460317	97.17735286	145.9156488	217.9633298	324.3726138	478.5592217	689.9017393	955.9809247	1257.278744	1556.441349	1813.718746	2016.978997
TaCl5_mp-29831	22.09557451	12.64456824	7.632555633	5.867110153	6.078706407	7.680481162	10.46063256	14.49558671	20.33875699	29.00434776	41.99932495	61.87494519	92.95834117	141.5644987	216.0254284	328.1623101	495.5746654	739.050901	1070.992752	1482.024919	1935.574969	2367.371521	2698.201145	2880.376892
Sm10Se19_mp-29832	11.28162983	7.575378606	5.276912907	4.654491485	5.014347563	6.012802189	7.711862077	10.56061689	15.23567962	22.46499769	33.2220598	49.43132164	74.51568557	113.4121513	172.8920011	262.9660221	397.4810386	590.6349113	850.5871465	1173.985783	1536.93942	1885.353641	2158.42207	2332.75167
IF3_mp-29848	41.16801983	22.52805221	11.52725283	7.290443045	6.193270918	6.567550023	7.904238522	10.30743113	14.28370391	20.54705977	29.98767426	44.10320068	65.64761606	98.96322711	150.1413186	227.7205226	343.259813	509.0588549	732.0902142	1007.538603	1312.832199	1602.619083	1823.427693	1953.107607
C3S8_mp-30078	23.76365255	12.51560489	6.757459751	4.917973768	4.95840802	6.114159932	8.194327073	11.37744188	16.22200531	23.57159924	34.62204937	51.44068714	77.56894035	118.2136464	180.4116278	274.1362484	413.4033295	613.8967546	885.8411659	1225.254141	1604.311543	1965.944158	2249.230566	2438.10812
Na3As7_mp-30233	14.59885241	8.145952508	4.992610002	4.239244039	4.822447581	6.294892264	8.471791615	11.54175928	16.18967529	23.47442149	34.85129949	52.59917727	80.32945239	123.1565369	187.9437225	284.5103683	426.6795598	630.1184476	906.5937855	1256.603326	1657.509948	2053.243656	2380.690489	2624.577095
BaP8_mp-30275	14.63009057	8.188700968	4.91120576	4.022911007	4.37934739	5.542936051	7.453706628	10.40201817	14.99605873	22.02365886	32.55625029	48.50123307	73.13958612	111.2594673	169.4652825	257.441801	388.8083272	578.5524629	837.0248186	1162.927886	1532.804161	1893.347691	2188.940989	2408.829861
Bi4O7_mp-30303	23.79190128	13.4262426	7.422173869	5.219633711	4.699065228	4.95295124	5.791126354	7.458430695	10.44496579	15.30948282	22.64152084	33.40717886	49.48151333	73.97417733	111.503472	168.64689	253.6823534	374.4195935	535.3154086	735.4183461	962.9693893	1188.432145	1378.56042	1526.994861
Ca2Ge_mp-304	10.32726427	6.741911844	4.962614213	4.877637653	5.914510246	7.717804679	10.17291716	13.59583176	18.71882876	26.66150807	39.34238703	60.1798297	94.21692749	147.1959591	225.2415986	337.7422213	500.8440656	735.2293452	1057.63537	1470.183752	1946.050872	2419.659407	2818.901277	3115.658655
Ca2Pb_mp-30478	9.262379014	6.263667801	4.786869164	4.809620458	5.84212667	7.565769208	9.93278787	13.31458929	18.42293499	26.28337279	38.68613614	58.89886643	91.732909	142.5724544	217.1559139	324.5985998	480.7988792	706.0372272	1016.751427	1415.87017	1879.344475	2344.397034	2736.332233	3016.480719
GaI3_mp-30954	18.64487099	10.35887312	6.442041907	5.360783667	5.917421149	7.53421838	9.891264847	13.11604611	17.99873349	25.79416158	38.06589602	57.00759973	86.14175867	130.9210557	199.2926279	302.9397151	458.1405448	682.4856169	986.1707147	1362.946628	1782.637231	2184.356908	2494.175481	2679.969935
Ca2As3_mp-31010	11.61876831	7.483435485	5.213976033	4.713027471	5.241223037	6.439453605	8.310750279	11.21214257	15.72900186	22.62397492	33.20803601	50.00313099	76.93197901	118.7495611	181.0348199	272.4306508	406.8752224	600.8965448	865.9296586	1200.195443	1579.495509	1951.332768	2259.657585	2481.626534
As8S9_mp-31070	20.12664078	10.80568814	6.131119406	4.739191069	5.012252818	6.325572993	8.494532924	11.70697854	16.58682022	24.06408416	35.37563436	52.54195229	79.02054776	120.0439465	182.9299124	278.125728	419.9468537	623.8787964	899.7501044	1243.762588	1628.605258	1996.384506	2284.171727	2476.067579
RbBi_mp-31105	8.21234169	5.477373454	4.256460118	4.492130213	5.784154508	7.77585328	10.28234566	13.67753536	18.88545876	27.18972926	40.4300883	61.57488848	95.01946605	146.2679622	222.1782549	333.1664342	495.127933	727.080481	1045.283783	1455.487595	1935.903597	2418.460614	2819.652643	3108.178194
PtCl3_mp-31134	18.34891693	10.64008283	6.292785588	4.881124856	4.921281101	5.755372948	7.253786907	9.73063321	13.83522197	20.34713115	30.15090559	44.70371546	66.72542044	100.6301028	152.9095958	232.8245146	352.2672506	522.9232884	751.7549806	1036.711806	1357.841245	1667.801019	1914.178403	2085.542432
Si19Te8_mp-31135	15.17954339	8.700276293	5.299922621	4.347233196	4.658949974	5.734541419	7.479605293	10.1910464	14.50049497	21.22248253	31.43215111	46.96722577	70.94701272	107.9248843	164.1851314	248.8784972	374.6822375	555.3131319	800.2352347	1108.716923	1459.823812	1803.861761	2087.579814	2300.051629
K3Bi_mp-31286	7.490940779	5.401727713	4.555470005	5.085174836	6.744564518	9.22931215	12.35533848	16.42824738	22.28284269	31.3269232	46.16265644	71.44838652	113.7695465	179.7395876	275.0474887	409.0672381	601.0362629	878.1059496	1264.573803	1767.609806	2357.732771	2953.100395	3453.61699	3801.016105
NbI5_mp-31487	12.60338241	7.585307713	5.019524872	4.474266085	5.048346705	6.300758688	8.151397264	10.96740244	15.47359997	22.55133254	33.30828414	49.61572766	74.70074037	113.4225707	172.7415557	262.8711676	397.4780336	590.3521143	849.7304448	1172.73335	1534.731212	1879.618759	2148.738304	2332.364591
RbGa3_mp-31493	10.8790416	6.582870622	4.527799594	4.285570659	5.169056034	6.820488818	9.104286033	12.30553169	17.15931335	24.7318418	36.61060714	55.45307483	85.30285025	131.3141163	199.8826516	300.5485779	447.8365476	659.1041037	948.5066308	1319.373216	1750.925046	2186.329196	2561.299274	2857.341353
PbF4_mp-341	39.02951006	21.07285587	10.6470868	6.682407127	5.603944213	5.822244506	6.866417958	8.85133829	12.25546089	17.72137406	25.98708821	38.22991832	56.6599091	84.88388726	128.1072986	193.6574018	291.2002114	430.7056558	617.9843238	850.3108635	1111.173637	1364.405262	1566.247135	1699.599173
Ag2O_mp-353	10.86648664	8.094003438	5.863454176	5.05695259	5.174318755	5.965432186	7.604107065	10.61839222	15.68378539	23.40543717	34.59967957	51.22293531	76.97992048	117.2196125	179.2200162	273.8012324	416.0600644	621.1981675	896.7244279	1236.783875	1614.917589	1974.809668	2249.970988	2403.346799
NiO2_mp-35925	24.73155508	14.13937834	7.627640744	5.203902613	4.762133463	5.368383387	6.81976035	9.370205616	13.60371358	20.23858959	30.08132002	44.51032486	66.20611437	99.53814601	150.7907553	228.811954	345.2775767	512.3783858	737.8817303	1019.817087	1338.401629	1647.439422	1891.696505	2050.298046
MgB4_mp-365	16.19135469	9.728622799	5.874662426	4.486829982	4.311051718	4.809444643	5.93403404	7.953554233	11.30194872	16.49018317	24.30880313	36.31848129	55.0764757	83.87342935	126.847672	190.4681774	284.9147752	422.234802	611.2105081	851.9582245	1129.799605	1411.071208	1659.478542	1861.105568
MgP4_mp-384	15.86579911	9.200589531	5.604832724	4.531627458	4.741152668	5.713965873	7.376328056	10.02688891	14.24397383	20.77876503	30.74090067	46.15508005	70.35276504	107.8604969	164.55998	249.157472	374.4498898	554.9262373	800.5659414	1109.740909	1459.753804	1800.999501	2083.180201	2295.710061
CdTe_mp-406	12.76416694	8.003361704	5.333025257	4.6880545	5.217580307	6.423971102	8.147318549	10.73661779	15.00465543	21.97775867	32.78838434	49.03831892	73.54455759	110.9911361	168.44993	255.9502274	386.0454194	571.037897	819.4903129	1132.913592	1494.588504	1853.678202	2145.481426	2348.851938
Mg2Ge_mp-408	12.89730479	8.082017661	5.521772078	4.93610776	5.447518964	6.608414491	8.339543558	10.93593355	14.96387066	21.24163059	31.19728162	47.44421218	73.86631358	114.8728583	175.1916146	262.2193638	388.7745917	571.1944121	822.4795845	1144.305612	1517.356659	1894.939585	2225.953695	2489.48834
Nd2S3_mp-438	12.83419406	8.320864649	5.593544322	4.870446687	5.319243579	6.496826512	8.356354446	11.3094505	16.13438675	23.77979353	35.43304432	53.11291892	80.35335846	122.4874263	187.0001588	284.57672	429.3504809	635.7477031	913.0493534	1259.815131	1652.016617	2030.345923	2327.551888	2523.875904
CdAs2_mp-471	12.67219573	8.316819437	5.621246037	4.788691455	4.996995601	5.865207967	7.449423353	10.16822144	14.62859483	21.474583	31.62964636	47.00342822	70.95176736	108.1757465	164.9845148	250.8076461	379.0349204	563.6330338	812.4305096	1121.459594	1467.427985	1800.44938	2065.730355	2241.11072
Na3P11_mp-473	16.54852603	9.119642486	5.310932021	4.196786362	4.579711138	6.021904532	8.40158884	11.85329154	16.92391101	24.56124101	36.19748685	54.24408203	82.63845612	126.9225419	194.2889729	294.8903413	443.5880115	658.0427287	951.140565	1321.113973	1740.992532	2151.632858	2484.567562	2713.538272
N2O5_mp-504769	29.73188625	16.62987542	8.692021538	5.624715738	4.680134192	4.714308018	5.47989253	7.17817845	10.23166802	15.12813434	22.47573274	33.43912833	50.16503087	75.85431219	114.9474984	173.9611988	261.8646754	387.8136168	556.6118812	764.5785392	994.7220529	1214.11134	1391.393344	1522.424253
Gd2O3_mp-504886	30.08875356	18.15361503	10.41849347	6.882186259	5.786237525	5.941661332	6.886532354	8.674705099	11.74714455	16.78183489	24.63343466	36.60280677	54.91455397	82.92725031	125.1308417	187.7941947	279.9884435	412.2315106	591.2501344	814.9484516	1070.710239	1331.71663	1555.926606	1708.493298
SiBr2_mp-504902	20.51551161	11.46874815	6.92885361	5.488349261	5.912909666	7.693708808	10.62583846	14.76316524	20.68011131	29.4706769	42.76489655	63.25546927	95.4088657	145.6958613	222.7003005	338.6777768	511.7743843	763.2174754	1105.66318	1529.646061	1996.984603	2439.84267	2778.007496	2969.433363
AuBr_mp-505366	21.8055352	12.47991373	7.328536646	5.458937589	5.207536601	5.722478376	6.725944792	8.453194244	11.53781721	16.78764783	24.99216853	37.0574235	54.62720896	80.77542082	120.4604473	180.8576875	270.9819994	399.506159	571.715806	787.6126877	1037.291368	1291.379348	1507.3314	1664.364175
Fe3O4_mp-510252	13.25507072	9.252759815	6.097560566	4.787146578	4.564799193	5.051904252	6.327473354	8.811055397	13.07762886	19.64136772	29.11954757	42.98789017	64.14034417	96.86055424	147.09288	223.76014	339.361126	506.5695344	731.546922	1008.566096	1314.235682	1602.547403	1824.198237	1958.055757
V2O5_mp-510568	29.01927592	16.36372325	8.540800815	5.562459941	4.852897424	5.255132	6.477348519	8.717704445	12.50364497	18.51562949	27.55204502	40.94861204	61.2067975	92.30679936	139.8781418	211.8352839	318.7808253	472.027134	678.9707111	937.965684	1231.05356	1516.520446	1744.410279	1895.565469
Cs2S_mp-540703	6.643352852	4.143058461	3.109182885	3.268942301	4.49273881	6.694281014	9.568662081	13.07191324	17.99999817	25.8901227	38.93054794	60.31501392	94.71104269	148.3790305	229.3682006	349.1451654	524.6713609	776.632052	1122.185253	1565.289091	2082.929925	2609.399792	3055.635191	3377.48314
As3Ir_mp-540912	13.55915809	8.635431102	5.548287949	4.424309154	4.326153928	4.862209196	6.093481996	8.387161981	12.22639117	18.04219575	26.42873969	38.81115013	57.84090678	87.28440104	132.2855833	200.6721633	303.5656863	452.3035962	652.6678858	900.8928838	1179.28553	1450.917448	1674.039531	1828.160028
CrTe3_mp-540922	12.16906156	7.753623514	5.2282362	4.524654472	4.813241554	5.711349494	7.24549443	9.796392014	13.94193084	20.3314044	29.91849861	44.58135236	67.49442701	102.9839166	156.7741553	237.5221742	357.7988532	531.1369826	765.8963607	1059.722985	1391.708889	1714.901376	1977.33855	2159.041446
TiI4_mp-541013	13.76637077	8.015711369	5.15826752	4.548648079	5.197303275	6.610745336	8.603135852	11.47207998	16.00235421	23.23281668	34.41120495	51.4207246	77.45323296	117.5153848	178.9672009	272.4349482	411.780409	610.9965158	879.0551105	1214.307388	1592.603211	1955.495503	2239.233599	2433.431507
ZrI4_mp-541112	14.59770306	7.894115431	5.020336624	4.51506448	5.479000703	7.540411873	10.40926599	14.17947491	19.69060676	28.32297512	41.79835372	62.51562933	94.30072849	143.1104136	217.7893313	331.4600827	502.195544	749.306025	1084.466882	1501.898834	1967.220858	2408.462937	2744.202634	2950.795782
Cs3P7_mp-541113	12.45968232	7.113786016	4.545818369	3.952172416	4.663781861	6.435889602	9.106265531	12.70499351	17.81348711	25.58706043	37.76138484	57.06701418	87.75209601	135.6615478	208.2777304	316.227516	475.4724923	705.3730309	1019.958379	1417.065998	1869.128764	2316.667265	2685.775208	2939.570441
VS4_mp-541155	18.45796109	10.56088127	6.26560231	4.945001158	5.114722422	6.144872282	7.907208069	10.6981016	15.16308254	22.15927827	32.87167515	49.36238342	75.10670566	115.0945519	176.0450868	267.5904746	403.0842489	596.9114882	858.3126083	1184.274623	1549.079132	1897.33051	2172.931903	2366.616324
Y2S3_mp-541289	14.29732476	8.257318042	5.104113476	4.287858903	4.827117332	6.306982762	8.584322362	11.8705002	16.8548362	24.5810962	36.45178075	54.70224439	83.04315179	126.9740907	194.0711087	295.073514	444.7295389	659.3326925	950.4657046	1317.25574	1734.395026	2141.096534	2466.830216	2689.491136
Ge5Ir4_mp-541844	14.60556386	9.495852483	6.127347613	4.902724656	4.788514145	5.280296156	6.377406641	8.464237314	12.13323689	17.98064943	26.61168505	39.15144055	57.86565227	86.4344139	130.2591232	197.0976892	296.7671925	438.4432398	627.499855	864.0441344	1136.783863	1412.283682	1647.453266	1823.57432
CeF4_mp-542001	36.71760064	20.83570385	10.81251252	6.8144121	5.711981559	5.976408806	7.149481892	9.354322086	13.08592098	19.01709038	27.94722515	41.20286423	61.2770755	92.16627472	139.5089548	211.1720864	317.7079062	470.3515382	675.9278766	931.5316661	1218.745644	1497.135526	1715.722672	1850.014642
Rb3As11_mp-542233	13.74860828	7.693884784	4.814938658	4.205588453	4.907566562	6.50457821	8.790624021	11.94783823	16.70509124	24.18491557	35.87836681	54.04876015	82.28821777	125.8132953	191.8315366	290.7151152	436.8094701	645.9795113	929.7430982	1287.987343	1696.8813	2097.957039	2425.316654	2663.699964
V5O9_mp-542334	20.3991678	12.53152244	7.249533938	5.180676789	4.707128645	5.077238452	6.187696586	8.358228641	12.1597256	18.22294415	27.25557803	40.56209909	60.65118586	91.44704334	138.5364975	209.9922542	316.586975	469.2187676	674.249009	929.1622027	1215.339018	1491.120495	1711.228639	1862.741759
CsIn3_mp-542339	9.083632644	5.888556243	4.396493697	4.424550644	5.479011988	7.2662986	9.732169348	13.24775084	18.5602255	26.70179354	39.3326947	59.41422764	91.39575054	140.6026045	213.3340137	319.4754962	475.0370407	699.5661724	1008.793856	1406.072132	1868.565834	2333.81445	2727.231634	3014.938825
AsSe_mp-542570	19.55763023	10.59313247	6.113768764	4.799409166	5.0563685	6.220501341	8.074926582	10.8363722	15.1675864	21.99392683	32.45197611	48.28302101	72.46341063	109.6339096	166.4999894	252.6856604	380.9964183	564.7430899	812.3167644	1121.283725	1469.117241	1804.789563	2072.11873	2259.260616
AsS_mp-542604	20.37319132	11.02669321	6.294691582	4.84178319	5.11438571	6.505696723	8.826119721	12.22466855	17.29732713	24.98791037	36.58524088	54.19932093	81.42407232	123.6602627	188.3824653	286.2644842	432.2185092	642.7446328	928.2159437	1283.916975	1681.103934	2061.012188	2357.270418	2546.995326
P4S9_mp-542630	19.73298005	11.15758437	6.619562612	5.101422018	5.431427389	7.170046545	10.22685614	14.67170349	20.92827706	29.88618585	43.07739812	63.30464575	95.29861038	145.7298274	223.0618432	339.1733727	512.1992359	764.3136913	1109.604567	1538.976635	2013.171725	2463.644537	2809.903884	3006.939529
GaTe_mp-542812	15.42201806	8.703234195	5.382697605	4.54970682	4.995501788	6.156084847	7.84404022	10.33390063	14.32397492	20.74525416	30.75740026	46.12330394	69.71354396	105.8000329	160.446036	242.4505673	363.6558006	536.5595842	769.9969969	1064.362227	1401.593066	1734.979968	2012.718035	2226.227991
AsS_mp-542846	20.3180344	10.99307836	6.280563583	4.835878267	5.116773439	6.52320143	8.867480268	12.29565738	17.40138728	25.1306688	36.78018226	54.47532071	81.83363784	124.2846371	189.3341153	287.7041333	434.404772	646.0789483	933.18157	1290.887058	1690.185601	2072.021704	2369.654571	2559.790372
SnO_mp-545552	21.82810365	11.72143788	6.451554833	4.731414403	4.655542544	5.447834221	6.905519354	9.25043626	13.05688307	19.07110629	28.15733581	41.6659586	62.02877986	93.14601101	140.7114231	212.8806499	320.3966648	474.3153325	681.7288103	941.4253286	1236.50156	1526.643238	1766.020127	1943.701615
SnO_mp-545820	18.92321184	10.65503146	6.154011648	4.661471194	4.565548745	5.200573765	6.458108594	8.626980837	12.24953917	17.95615102	26.51434744	39.28471904	58.71703411	88.53213382	134.0146491	202.8825236	305.5306738	452.5783409	650.4991448	897.6214686	1177.308045	1451.602497	1680.631422	1857.405082
SnO2_mp-550172	21.63070904	12.56709444	7.059893244	5.014011669	4.580223972	4.960076047	6.020555455	8.046251228	11.56504416	17.15983256	25.46953169	37.65213998	55.96334863	84.01168505	127.0252746	192.5296644	290.3510713	430.1367556	617.2940621	849.5470142	1110.720854	1364.366362	1571.344106	1722.983451
PbO_mp-550714	27.35964244	14.88698602	8.334649907	5.944740001	5.525914905	6.022811254	7.051309411	8.755425608	11.70091301	16.6817565	24.61859059	36.74272322	55.05517796	82.74299748	124.5040984	187.1360394	279.7823425	412.0444184	589.9469619	812.4055261	1067.078021	1323.870333	1542.327523	1703.446307
Tl2O_mp-551470	15.85270658	9.294606771	5.829212777	4.827539757	5.002091606	5.699959541	6.754484888	8.478134114	11.49766825	16.57266909	24.57929193	36.77811367	55.23782014	83.14499873	125.1534859	187.9795541	280.31649	410.9884223	586.6865197	810.0173098	1072.016231	1341.448813	1579.339261	1776.935473
WO3_mp-553964	30.2992756	16.3760831	8.384947427	5.438303187	4.660031327	4.857283132	5.737259485	7.492713585	10.60088264	15.62880295	23.15470911	34.10178336	50.31980058	74.95536373	112.6955427	170.1755194	255.8151253	377.8052997	541.0091946	744.3801859	975.6237801	1204.516459	1395.968702	1541.109936
RuO4_mp-554791	32.51909748	17.89365735	9.374637985	6.099581518	5.404872129	6.056799445	7.698086287	10.44290076	14.76450576	21.36654227	31.19837798	45.91046075	68.43850301	103.1702121	155.9759896	235.1385359	352.5995366	522.0883429	752.2623792	1038.916701	1359.68374	1670.587322	1917.61923	2072.452448
ZnS_mp-554820	16.60747855	10.38838592	6.32294598	4.832006313	4.868853527	5.884195466	7.753618836	10.73929127	15.49319422	22.89090707	33.97357371	50.43342149	75.40872507	113.9429533	173.2007214	263.1504252	397.0230282	589.0144882	848.8264123	1175.756079	1549.80411	1919.503588	2214.882567	2397.871722
ZnS_mp-555543	16.2053105	10.12606148	6.173002585	4.741394505	4.808748611	5.847810836	7.747226237	10.77723681	15.59509778	23.07528225	34.24873137	50.79809135	75.86886044	114.5423776	174.0667706	264.5422121	399.3458828	592.7841142	854.6247839	1184.181439	1561.228495	1933.623804	2230.779794	2414.819596
ZnS_mp-555594	16.21775516	10.13646658	6.179134467	4.74338888	4.807977872	5.845252052	7.743340619	10.77135051	15.58501769	23.0575696	34.21916038	50.75141715	75.79730315	114.4323909	173.8936604	264.2654782	398.9124979	592.1395461	853.7148885	1182.946075	1559.642577	1931.780822	2228.829788	2412.755037
In6S7_mp-555853	14.49401449	8.503355046	5.35207753	4.521402828	4.92138492	6.06670904	7.869777139	10.65685926	15.0966692	22.0397286	32.61579456	48.76112692	73.73150629	112.2251733	170.6944871	258.5601495	388.8485975	575.44133	827.5142944	1143.591246	1501.463022	1849.617105	2133.674419	2342.983565
Nb2O5_mp-556048	26.62734552	14.5698426	7.659532805	5.167674641	4.680840859	5.190175944	6.457248413	8.702356281	12.46482299	18.42144329	27.3434687	40.50358185	60.2939757	90.56237625	136.8440951	206.9868957	311.3654103	460.7520939	662.0101804	913.6265246	1198.697878	1477.712448	1705.046382	1866.882317
AsS_mp-556328	20.5642032	11.19501887	6.406468915	4.909416793	5.160695303	6.547543327	8.876407764	12.28865034	17.37210238	25.0682174	36.67047777	54.30064544	81.5713469	123.8996637	188.7541585	286.7924025	432.9792204	643.9688827	930.1988988	1286.735717	1684.699387	2065.59565	2362.550008	2550.634451
Tl2S_mp-556516	13.04256877	7.7640581	5.122622656	4.561349325	5.098207718	6.171838488	7.58463393	9.661403766	13.13871565	18.94376955	28.16711201	42.34927506	63.93533379	96.62894407	145.8319418	219.4108388	327.7163977	481.5194779	689.1874216	953.7385949	1263.171737	1577.71829	1848.582582	2064.999833
Bi2O3_mp-556549	34.13072192	18.52542262	9.894886665	6.584066632	5.745846041	6.032020201	6.988103479	8.721790372	11.73604029	16.73464996	24.52501292	36.24873296	53.88700666	80.65152808	121.2360375	182.34533	272.9388007	402.3414122	576.0730728	792.1905033	1037.557956	1282.212787	1486.562346	1631.408404
MnF3_mp-556560	21.40805371	12.81665829	7.258923892	5.059381824	4.458878923	4.685954167	5.634046353	7.580986199	10.99239481	16.34415381	24.20322977	35.76925926	53.37214395	80.56175132	122.3503052	186.1371105	282.0150363	420.04945	605.1165294	832.5892471	1083.408573	1320.864786	1508.870415	1639.354867
GaS_mp-556742	16.9629676	9.257816327	5.376065184	4.231798851	4.584416145	5.970824728	8.260019911	11.60565181	16.57676123	24.08216474	35.37020636	52.48099403	78.86776775	119.6803846	182.0120934	276.0325849	416.1065834	618.42776	893.8394397	1239.388604	1629.561249	2009.632044	2315.746605	2523.673182
ZnS_mp-556775	16.62744296	10.40234871	6.33132759	4.834191839	4.867518378	5.882111487	7.752620587	10.73847698	15.4883721	22.87584281	33.94209662	50.38048973	75.32840569	113.8217947	173.0062712	262.8239886	396.4942377	588.231425	847.7520668	1174.32826	1547.993641	1917.481117	2212.900664	2395.840374
HgO2_mp-557266	20.48855573	12.62142315	7.332616933	5.191697755	4.570218135	4.718938607	5.536465116	7.310210821	10.52408804	15.66331194	23.20786736	34.11189393	50.39065616	75.37265844	113.9670655	173.2446843	262.2028225	389.1603728	558.1983181	767.0827808	1002.491978	1233.250214	1423.850708	1562.904476
As4S3_mp-557321	19.52262428	10.73019017	6.302202661	4.907751236	5.252355385	6.836172233	9.502151906	13.34925525	18.92093852	27.18089748	39.52954471	58.30397121	87.45103877	132.7782859	202.1282123	306.7603499	463.0999763	690.0967962	999.3647752	1383.780921	1810.54683	2218.582906	2536.130823	2728.655132
WO3_mp-559122	29.5844268	16.04277118	8.256426374	5.384898101	4.625888293	4.820399209	5.691406992	7.439588588	10.54226022	15.55950418	23.06103024	33.96810102	50.1326135	74.69790848	112.3456055	169.7139555	255.222704	377.0265159	539.9219625	742.813498	973.3672859	1201.401789	1392.299297	1537.868932
SnS_mp-559676	14.75654776	8.563480124	5.316390523	4.436595271	4.792039221	5.889300486	7.641188119	10.37011335	14.73403489	21.55240548	31.87136368	47.47677535	71.45043689	108.3822319	164.7273596	249.8960434	376.6699598	558.3955652	803.6551267	1110.727739	1457.875938	1794.783923	2068.277437	2268.597223
MnF2_mp-560902	31.59808737	18.715107	10.10531809	6.474235928	5.514657712	5.938897932	7.349307125	9.857014067	13.9270133	20.22752919	29.63249447	43.6805199	65.19703507	98.49802872	149.3832609	225.9241866	339.6230329	503.7212303	726.7831005	1005.429514	1319.185772	1625.525212	1867.834706	2010.705408
TlS_mp-561066	14.25627594	8.432397145	5.429245928	4.688679738	5.122970005	6.173196898	7.680594421	9.9673466	13.7356779	19.87717607	29.49296826	44.2681581	66.94301504	101.5647682	153.8604808	232.1537862	347.5996435	511.877288	733.4283145	1013.50935	1336.436483	1658.452001	1929.29667	2138.6439
ZnS_mp-561258	16.20756766	10.12740046	6.173758236	4.741260236	4.80815316	5.847340043	7.747338165	10.77782802	15.59538788	23.07409021	34.24493295	50.79089467	75.85748093	114.5247941	174.0375377	264.4912442	399.2618303	592.6608125	854.4601962	1183.968203	1560.96395	1933.342032	2230.5266	2414.568567
ZnS_mp-561286	16.59575602	10.37946078	6.317694031	4.829976598	4.868836761	5.885367238	7.755623007	10.74267205	15.49961527	22.90284656	33.99381858	50.46507511	75.45628517	114.0148167	173.3133539	263.3317559	397.3094787	589.4422634	849.4306187	1176.577496	1550.861272	1920.731281	2216.173841	2399.23188
Ag3F8_mp-562412	17.74558387	11.37469505	6.856118419	4.965165978	4.429355263	4.655304559	5.611418674	7.610933092	11.11762426	16.55634989	24.43164061	35.94626206	53.50005726	80.72808174	122.7543832	187.1998855	284.467543	424.6820138	612.1151304	841.1723599	1092.406362	1329.30571	1514.791943	1636.49592
PbI2_mp-567199	19.90419742	11.19526743	7.051485734	5.82521362	6.162568287	7.295521793	8.836674099	11.011703	14.66808412	20.9956472	31.36016586	47.45846747	71.89456507	108.9170245	165.1281332	250.3876462	377.9779984	561.5993973	809.177372	1117.334682	1465.255166	1805.638012	2076.440283	2249.340292
TeI4_mp-567269	17.56403645	9.894386065	6.17661974	5.233218555	5.807277061	7.254281866	9.249219323	12.01025018	16.36895114	23.49476849	34.74073162	51.94373046	78.13926734	118.2892339	179.9446745	274.0915603	415.0768955	617.3513051	889.5099831	1228.224875	1608.210365	1971.156677	2248.919594	2422.825284
CdI2_mp-567359	16.77188978	9.999684665	6.429697205	5.341039022	5.730932071	7.023894344	8.944662442	11.70616715	16.10403836	23.28259659	34.55153215	51.65572643	77.51591959	116.9523968	177.2401502	268.9338186	406.1060436	603.3783122	869.5642277	1201.839198	1578.81645	1949.647082	2244.610632	2426.323552
CdI2_mp-567442	17.09775898	10.19054143	6.553129669	5.421508311	5.788158226	7.07115772	8.991451827	11.75754486	16.16347795	23.35898803	34.66678058	51.8507581	77.85252083	117.5049159	178.0772206	270.1289476	407.8284614	605.9860304	873.457055	1207.098199	1585.253837	1957.353674	2253.569591	2435.035307
CrCl3_mp-567504	14.72036506	9.32014278	6.051990274	4.944632318	4.970088991	5.662180327	7.014068747	9.343264245	13.12595773	18.93414356	27.75208927	41.59330387	63.7563338	98.47187858	150.9517414	229.0995653	345.0322925	512.2337649	738.3010624	1018.005813	1327.207459	1620.868875	1855.355483	2016.831611
CdI2_mp-567534	17.13945132	10.2133054	6.568213302	5.432039874	5.796947405	7.080531273	9.00316865	11.7726529	16.18321495	23.38627103	34.7077223	51.91615349	77.95893826	117.6744302	178.3361235	270.5119971	408.3960171	606.8393992	874.7116598	1208.815682	1587.424888	1959.953771	2256.510054	2438.015036
Cs2In3_mp-567752	7.908571875	5.330297406	4.21104664	4.503888025	5.873724547	8.055143218	10.941619	14.89528914	20.7593917	29.77712998	43.98732193	66.95505698	103.8997651	160.8209823	244.4542441	365.4353743	541.6785984	795.8843677	1147.342006	1601.559715	2132.891513	2667.582786	3115.5899	3433.696763
InI3_mp-567789	17.80895359	9.944934774	6.265427591	5.29586651	5.896589704	7.490860507	9.744040167	12.80404764	17.49842748	25.10361283	37.16716458	55.78990029	84.320007	128.0294959	194.7612453	296.1045138	448.0160035	667.4715565	964.2937077	1332.888644	1744.591489	2139.756824	2445.24164	2630.121557
ICl_mp-568024	18.45613636	10.18872242	6.093407398	4.999036743	5.49111118	6.965015733	9.191258015	12.38811475	17.29090348	24.95518958	36.71633081	54.65964558	82.34842095	125.3301951	191.6134757	292.6458286	443.5765191	660.002878	951.2618189	1312.812649	1714.659295	2092.185603	2376.758574	2555.885066
K2Ga3_mp-568052	9.949942393	6.413802706	4.71941432	4.67229769	5.719033499	7.522328214	9.964766859	13.34002465	18.34754428	26.06885814	38.37416315	58.59585376	91.61412617	142.9124923	218.287699	326.7806694	484.2298604	711.2462099	1025.128058	1429.634168	1900.976522	2377.410781	2788.949294	3105.799842
IrCl3_mp-568208	24.43251078	13.99456084	7.982551147	5.814478463	5.590940014	6.396814813	7.937803549	10.41068972	14.44234783	20.89722249	30.7981613	45.69408264	68.33376109	103.1410078	156.5203661	237.499517	357.9505426	530.159945	761.6683729	1050.060745	1375.608436	1692.331774	1942.867428	2103.546843
SiSe2_mp-568264	18.95509293	10.24530338	5.959984054	4.692626705	5.077831954	6.592886774	9.054567631	12.58153474	17.76655237	25.60111209	37.45630867	55.53318546	83.50900119	126.8492542	193.0799163	293.0269484	442.0864127	657.607782	950.6412208	1316.341551	1725.452149	2118.846448	2428.307401	2627.351335
BiBr3_mp-568301	27.40715745	15.28176384	9.340174857	7.191567989	7.199699653	8.485482954	10.63122016	13.75565033	18.64128221	26.54041142	39.03558022	58.38844365	88.27105977	134.2959642	204.4073471	310.2533293	468.7085077	698.6040168	1009.733483	1391.781048	1811.353896	2210.836547	2516.746216	2684.015017
K3Bi_mp-568516	7.351224819	5.300386241	4.480334379	5.04952862	6.792809757	9.403695552	12.6566437	16.85460661	22.90871301	32.33621251	47.83009228	74.12423721	117.9353636	186.2035557	285.2165741	424.9946184	625.1776663	913.1429329	1313.6266	1834.469552	2445.453443	3060.563387	3575.123952	3933.245754
HgI2_mp-568742	15.52858409	9.138372484	5.81594862	4.935186788	5.324961028	6.342567121	7.757135942	9.890342304	13.51983702	19.60853458	29.1546563	43.43362721	64.68839852	96.87712198	146.273889	221.9150964	334.9511089	495.8904841	711.4260865	981.8502131	1291.974024	1597.964845	1845.43807	2020.56973
TaBr5_mp-568846	20.41186631	11.22455901	6.628530627	5.243930688	5.551504776	6.87237341	8.935177179	11.91958747	16.53621227	23.82045669	35.00763611	51.89484795	77.56588007	116.9838825	177.4891726	269.7024954	407.8313655	606.6202646	874.660891	1207.537055	1579.599338	1935.766044	2211.339852	2384.268688
AgI_mp-568927	12.13588179	7.821242184	5.280360541	4.644106102	5.164066554	6.377772652	8.137565141	10.79494247	15.17560188	22.31706249	33.3156337	49.68134764	74.16950977	111.5412492	169.0993891	257.1383185	388.3267362	574.8110845	824.7923108	1139.583295	1502.800565	1863.609141	2154.619076	2350.057879
PdCl2_mp-569008	18.28655307	10.81262553	6.673573636	5.517625066	6.043430533	7.671942302	10.2431489	14.05955342	19.91198323	28.87440659	42.35703954	62.83007136	94.80395167	145.4626335	225.2158753	348.7492594	535.0200129	802.6165795	1160.40519	1596.786731	2064.853791	2474.693563	2739.639551	2851.071381
MgH2_mp-569051	23.14095561	11.13788005	5.478795299	3.623502688	3.472198777	4.326237886	6.072133607	8.831920807	12.94214139	18.95575345	27.74534857	40.88360828	60.96139145	91.46033078	136.706623	203.1161162	301.0247013	443.4966907	640.032431	888.8688977	1172.840172	1459.629204	1713.118504	1918.008656
HfI4_mp-569059	19.34372188	10.81432701	6.730152067	5.54404895	5.945441358	7.243071891	9.087221126	11.6720681	15.81776717	22.70969961	33.71124982	50.58068393	76.1346281	114.9834424	174.2024527	264.2830529	399.3828346	594.166028	857.005608	1183.641182	1550.513915	1906.136834	2185.1809	2359.230393
BiI3_mp-569157	23.32593863	12.96544262	8.067168055	6.523136767	6.782437994	7.992026573	9.725647535	12.19268628	16.27973652	23.26923226	34.65980276	52.36167275	79.34126661	120.3816429	182.8054408	277.5669988	419.7012381	624.9104751	901.5671506	1243.374059	1623.930729	1989.68537	2272.012646	2437.5014
CuI_mp-569346	13.84503286	8.854742563	5.817013843	4.946040784	5.326975694	6.443449644	8.172174222	10.88310629	15.37840111	22.65749048	33.83461758	50.57507072	75.89136762	114.7505606	174.5190468	265.5252405	400.6589957	592.4646703	849.2685561	1171.505429	1540.496994	1903.011165	2192.394826	2385.80678
HgN6_mp-569461	33.42537794	18.81758038	10.06594368	6.479083569	5.581734805	6.077207189	7.539963998	10.03189389	13.98593844	20.08984729	29.29382308	43.20653694	64.60205191	97.50299681	147.1111683	220.759703	329.4598294	486.395445	700.057486	966.5355869	1266.064868	1561.14435	1802.596269	1958.22927
CdI2_mp-569666	16.88766534	10.03565374	6.462285591	5.372134669	5.774267754	7.102275419	9.079738673	11.91247357	16.40072682	23.71010738	35.18538749	52.6225827	79.01279806	119.2611476	180.7423749	274.1841615	414.0146321	615.3483334	887.2141756	1226.295772	1610.298711	1987.588392	2287.277511	2470.222345
CdI2_mp-569722	17.24178939	10.25658852	6.593846182	5.459250043	5.834387316	7.131796846	9.0666438	11.84571041	16.26887442	23.4989549	34.88080875	52.20998906	78.46474899	118.514548	179.6666277	272.5381588	411.4013697	611.2028283	880.8742065	1217.162583	1598.056556	1972.452314	2270.079797	2452.07993
K2P3_mp-569857	11.87696627	7.032836358	4.662511589	4.300835399	5.221015712	7.092461567	9.737877784	13.35056406	18.68676797	27.00572946	40.24899919	61.62863769	96.04905087	149.8389232	230.6719034	349.4393764	522.5967132	770.2565091	1108.865658	1540.50599	2036.099517	2523.260064	2923.241918	3216.963518
CrCl3_mp-569890	19.01339398	10.84857383	6.356425391	4.961970004	5.189987626	6.414716757	8.476057137	11.62720282	16.54283378	24.1757744	35.79921564	53.54708469	81.10009683	123.9942614	189.8723559	289.4799019	437.3403499	649.0618487	934.8708913	1291.790717	1692.016951	2073.560058	2368.327549	2558.384295
CdI2_mp-570054	17.14618257	10.2175961	6.570961711	5.433678541	5.797816129	7.080795482	9.002954013	11.77203098	16.18213926	23.38459762	34.70524939	51.91260962	77.9538875	117.6669759	178.3243256	270.4925439	408.3651563	606.7943029	874.6486729	1208.726493	1587.302329	1959.807204	2256.356965	2437.844525
CdI2_mp-570089	16.95385776	10.0768439	6.487609058	5.388509829	5.785059878	7.107797831	9.079127273	11.90474674	16.384565	23.68381987	35.14756304	52.57217221	78.94750875	119.173861	180.6155185	273.9842177	413.6916737	614.8405349	886.4475226	1225.183065	1608.780414	1985.713949	2285.183817	2467.967965
CuI_mp-570136	14.31223332	8.990489144	5.806638721	4.863781568	5.213864664	6.329423361	8.057085899	10.72332342	15.10678491	22.2071485	33.13188631	49.48087869	74.1305771	111.8754252	169.8715969	258.1591679	389.3201024	575.75396	825.8380412	1140.265096	1501.575721	1859.061629	2146.997893	2340.257311
YbPt_mp-570180	11.69676548	8.308685012	5.773084599	4.819542637	4.775298553	5.312479913	6.559067883	9.007730004	13.32654925	20.08704997	29.78797618	43.59141652	64.11099477	95.68882993	144.7734094	220.7205416	335.3575194	499.4968441	719.1375012	994.5310098	1313.405247	1635.573914	1902.523745	2076.797178
ZrZn_mp-570276	8.846790368	6.825181641	5.278603058	4.925035288	5.428883576	6.626658424	8.746047763	12.3926076	18.3366858	27.3065235	40.38664238	60.07193695	90.84244652	138.8712682	212.2688261	323.2125127	489.3522074	729.4165087	1054.042009	1458.146716	1910.967476	2344.121458	2674.735597	2853.35023
AgBr_mp-570301	11.89784942	8.02072034	5.541746066	4.89698471	5.371425754	6.558073869	8.446773529	11.50559685	16.57352814	24.61362603	36.71333193	54.71096034	82.05320148	124.2884231	189.5223103	289.2442293	437.9947971	649.7331199	932.7999294	1285.514029	1684.207362	2068.06424	2365.236205	2552.014357
LiSi_mp-570363	14.99525448	8.025708933	4.719612634	3.89969667	4.426651529	5.894624378	8.151013294	11.31778139	15.96591545	23.114012	34.36311324	52.36142157	81.1525811	125.9435372	192.9952932	291.221775	434.4440105	640.1081575	922.8960794	1285.437164	1705.755192	2128.822968	2493.588837	2784.29961
CdI2_mp-570410	16.92717927	10.08482754	6.48628222	5.37964206	5.762180596	7.057334136	8.988002153	11.76395438	16.1809677	23.38939819	34.71056894	51.90626878	77.91818087	117.586552	178.2014031	270.34978	408.2066056	606.5585454	874.2747286	1208.312624	1587.015328	1959.511063	2255.82631	2437.649029
CdI2_mp-570437	17.38875306	10.36802119	6.658743223	5.493355554	5.841482652	7.104380578	8.995685778	11.72435315	16.08522084	23.22833436	34.48056433	51.61138461	77.55969751	117.1388316	177.5755339	269.3585513	406.5590728	603.8857991	870.1363565	1202.199313	1578.563191	1948.938701	2243.871135	2424.741429
CdN6_mp-570471	30.84257846	17.85467704	9.692488472	6.276600559	5.441906895	5.99485423	7.55427015	10.19441094	14.33862565	20.66586559	30.15887922	44.55193603	66.85424699	101.3847293	153.6269897	231.2330683	345.8242692	511.598615	737.9736944	1020.932493	1338.982706	1651.301166	1904.223401	2061.574406
Rb3As7_mp-570539	12.03566139	6.867234016	4.438134284	4.020901753	4.857767269	6.611615811	9.070961748	12.39012346	17.31858001	25.06033476	37.24495714	56.33227163	86.16044476	132.2128245	201.9658401	306.1597467	459.8167147	679.8828704	979.143476	1358.377705	1793.259789	2222.145682	2573.768482	2829.107625
CdI2_mp-570552	17.43509413	10.3459821	6.659717325	5.511057151	5.888476358	7.208848918	9.185339961	12.01880588	16.51288732	23.8486722	35.40222427	53.01504579	79.72756658	120.480565	182.6581523	277.012228	418.1139188	621.3391496	895.7941914	1237.753921	1624.419924	2004.145182	2305.747547	2488.658808
CdI2_mp-570559	17.44099095	10.3973145	6.678162157	5.50634133	5.851418401	7.114121696	9.007532094	11.73971436	16.10545085	23.2563547	34.5224629	51.6779441	77.66754492	117.3099214	177.8351069	269.7395785	407.1227745	604.7406776	871.4055552	1203.939623	1580.755898	1951.575451	2246.883906	2427.777429
SiC_mp-570641	24.03199464	13.37761834	7.112380639	4.802800588	4.425647745	5.097636747	6.603459826	9.119597959	13.13971615	19.35809554	28.68676309	42.68519307	64.1143457	97.1208471	147.324749	222.6786998	334.4708038	495.6600636	715.3865691	992.3798003	1307.825522	1619.109635	1873.911189	2048.310934
SiC_mp-570690	23.88638435	13.26428082	7.046080715	4.769666075	4.405625049	5.07785784	6.576975593	9.087228125	13.109865	19.34157616	28.68783299	42.69354524	64.10337704	97.05814731	147.1988634	222.5160346	334.2930621	495.4059887	714.9375748	991.7172932	1307.005584	1618.002565	1872.523606	2047.603844
SbCl5_mp-570796	20.55527271	11.26878732	6.502696008	5.078150082	5.426078432	6.93031174	9.398425876	13.00210117	18.3812853	26.53097758	38.82591778	57.57030008	86.73190617	132.30896	202.62763	309.4751896	469.024357	698.8533637	1009.810191	1396.253813	1824.923945	2227.758752	2530.631474	2712.390832
Ga2Os_mp-570875	14.51624268	8.970687194	5.643248927	4.542622118	4.570165741	5.199763699	6.37716769	8.44592006	11.99813111	17.67548622	26.14571537	38.52711908	56.97403221	84.99162239	127.7385085	192.5894883	288.9043469	425.7642884	609.3400058	841.3863295	1112.716464	1392.338005	1639.786377	1839.866563
SiC_mp-570985	23.90438267	13.25260656	7.03387169	4.767736044	4.406137849	5.071161122	6.554951485	9.047535174	13.05685941	19.28280394	28.62731814	42.62405309	64.00158538	96.88855414	146.9299206	222.1257389	333.7215833	494.4812734	713.408649	989.4245501	1303.901925	1613.978006	1867.737733	2043.172629
CdI2_mp-571037	17.15506541	10.22280249	6.574306561	5.435889822	5.799420552	7.082100868	9.004149354	11.77321004	16.18337333	23.38610061	34.70757921	51.91683133	77.96160583	117.6800914	178.3445255	270.5214648	408.4064504	606.8558172	874.7391034	1208.847029	1587.447826	1959.979196	2256.555574	2438.036974
MnBr2_mp-571084	17.55090216	10.22389694	6.199769854	4.989580384	5.301388617	6.531240503	8.484715243	11.41515985	16.04328142	23.3679318	34.61816127	51.69471614	77.88519029	118.3450817	180.4747517	274.7194756	414.7786897	614.8255565	883.9885793	1220.246977	1599.791572	1965.85813	2252.234846	2438.978363
CdI2_mp-571091	17.17781667	10.23665419	6.583151883	5.441498911	5.803048031	7.084378355	9.005456751	11.77372803	16.18309272	23.38506655	34.70623413	51.91622408	77.96325977	117.6851795	178.3522589	270.5286984	408.4115831	606.8635755	874.7538776	1208.856901	1587.434794	1959.958702	2256.554603	2438.000615
SnI4_mp-571436	16.45657588	9.1234282	5.708867164	4.931328171	5.623185865	7.207858328	9.36749806	12.29955278	16.84056955	24.19798516	35.79385909	53.57129067	80.69390492	122.2457003	185.9116357	282.9279471	428.1264139	636.643353	917.6683413	1267.839656	1660.632032	2035.589988	2323.772295	2508.619258
CdI2_mp-571535	17.15886448	10.22411369	6.575464419	5.436930481	5.800757039	7.084415359	9.008100602	11.77925561	16.19210291	23.39872152	34.72631869	51.94541431	78.00583994	117.7482986	178.4479474	270.6764118	408.6398062	607.2092436	875.2605641	1209.569327	1588.376748	1961.098731	2257.815985	2439.333672
CdI2_mp-571539	17.17203201	10.23144543	6.580305553	5.440252276	5.803418037	7.087097225	9.011318325	11.78331894	16.19735127	23.40594087	34.73717321	51.96286038	78.03441461	117.7939815	178.5176691	270.7791566	408.7915776	607.4376267	875.5968768	1210.028862	1588.955243	1961.791273	2258.601756	2440.126793
CdI2_mp-571559	16.90975883	10.07735067	6.480681608	5.375143123	5.757170808	7.049619355	8.975593726	11.74555411	16.15490985	23.35210002	34.65519771	51.8212543	77.78557768	117.3810388	177.8894684	269.8833924	407.5059942	605.4986612	872.7116015	1206.15026	1584.239537	1956.167557	2252.060509	2433.784699
CdI2_mp-571592	17.18658599	10.22845474	6.581896708	5.445249531	5.815004341	7.112058709	9.056314581	11.85306747	16.29859977	23.55275954	34.95529366	52.29507594	78.54749041	118.584666	179.7196116	272.5879695	411.5214883	611.5618135	881.6616225	1218.432955	1599.792492	1974.839753	2273.23174	2455.232351
CdI2_mp-571593	16.97628662	10.11589908	6.505924044	5.391638131	5.769045398	7.06002954	8.987020499	11.75944849	16.17240555	23.37570621	34.69050945	51.87840048	77.88000532	117.5322059	178.1174565	270.2125076	407.9869943	606.2305715	873.8058241	1207.642697	1586.095249	1958.399545	2254.639624	2436.334438
CdI2_mp-571607	16.91375844	10.08037967	6.482323795	5.376104543	5.757535866	7.049001274	8.973487149	11.74157313	16.14860032	23.34266514	34.64135262	51.80099233	77.75569668	117.336571	177.8229618	269.7831751	407.3528234	605.2635321	872.3608783	1205.658391	1583.598321	1955.38805	2251.180162	2432.871453
InCl_mp-571636	15.89255372	8.797167217	5.295486334	4.373581948	4.871696893	6.310663245	8.505537387	11.64177142	16.39753124	23.78968857	35.11695314	52.36764152	78.86946125	119.7159218	182.1706685	276.6754567	417.4142998	619.6455422	893.5288188	1237.039257	1625.69296	2003.086392	2304.596224	2511.816964
CdI2_mp-571668	16.9690892	10.10571355	6.501197903	5.390333519	5.771969729	7.070357081	9.008099674	11.79367525	16.2231444	23.4497987	34.80015992	52.04364502	78.13222091	117.9176232	178.7015708	271.0930404	409.3207317	608.2515464	876.7850283	1211.784788	1591.457283	1964.870334	2261.89832	2443.847424
ReS2_mp-572758	19.95410151	11.33452399	6.509818507	4.879281166	4.79664014	5.52126711	6.862678019	9.078180556	12.78011637	18.73155155	27.75269503	41.06545804	60.95038903	91.24096626	137.6809718	208.4241731	313.8321152	464.1222757	665.7770648	918.3217751	1206.965766	1492.91572	1729.087138	1901.463868
GeS2_mp-572892	18.88162222	10.37760472	6.026712025	4.682581704	5.023543755	6.553894071	9.135528352	12.89159125	18.36539143	26.49066086	38.63519111	57.12087687	85.88542853	130.7163228	199.415119	303.0980502	457.7783541	681.8476372	987.0802372	1367.88379	1792.743177	2199.715906	2517.12843	2714.311386
Yb2S3_mp-573084	14.98017814	9.12591503	5.751963603	4.748838168	5.021707658	6.021786657	7.623450993	10.15941557	14.34776234	21.08307591	31.38977208	46.84497003	70.26128997	106.1532121	161.1327536	244.5804903	368.512261	544.9449181	781.9446186	1079.719525	1420.569211	1756.345867	2029.380695	2222.928365
CsGa3_mp-574338	10.51024757	6.72726352	4.821713203	4.570427372	5.325838899	6.750800065	8.816663892	11.86622755	16.5174687	23.6198581	34.63463396	52.27573536	80.62502615	124.4320725	189.0704909	283.0422323	420.6084082	619.4628625	893.5374216	1245.010819	1653.612567	2067.353185	2425.499822	2698.40293
CdI2_mp-574663	16.91529261	10.037455	6.467592788	5.380889111	5.791176085	7.1361736	9.139060282	12.00308133	16.53113037	23.89844392	35.46531264	53.05042577	79.67629598	120.2867174	182.3034809	276.5331872	417.5556746	620.6892744	895.056589	1237.150713	1624.281688	2004.403987	2306.106983	2489.646727
AgI_mp-580941	11.9112578	7.476730915	5.037832714	4.512134826	5.158632731	6.540107912	8.493444001	11.35219436	15.96221598	23.41723097	34.91607433	52.13522205	78.04491379	117.646357	178.5445567	271.5401973	410.1615528	607.6571975	873.0293886	1207.257963	1591.655013	1971.302856	2276.035583	2481.750405
Nb2O5_mp-581967	30.09215524	16.55867865	8.624731271	5.68181308	5.003408139	5.404767346	6.571675156	8.688744525	12.27992845	18.03663994	26.77843259	39.82429901	59.56831287	89.7870259	135.8256367	205.1973442	307.8806967	454.3478957	651.3194948	897.301791	1175.923564	1448.924318	1671.188502	1827.563345
CeCl3_mp-582011	12.16583658	8.171935028	5.59913039	4.737675542	4.84354263	5.575806986	7.002346657	9.487750893	13.51684512	19.62175439	28.74678146	42.94695615	65.65520948	101.2961437	155.3660812	236.2695237	356.8525605	531.1347709	766.3537055	1055.8773	1373.559878	1671.466645	1901.346864	2043.195705
In2Te5_mp-582549	13.85269167	8.056151532	5.174836893	4.52449663	5.05879864	6.245875596	7.91045683	10.3638171	14.33986955	20.77865256	30.80621751	46.10684871	69.46828312	105.1614504	159.4088214	241.2712345	362.7097377	535.9910145	769.5742787	1063.771562	1400.360136	1731.257347	2002.603323	2205.352952
Tl2Te_mp-582753	11.53126872	7.115851718	4.893199296	4.501730981	5.096622175	6.156853417	7.530466944	9.588358291	13.07334516	18.88101342	28.04928686	42.06388458	63.30825789	95.39561655	143.6282991	215.8068882	322.2210554	473.5473052	678.2306835	939.9199939	1247.617682	1561.84077	1832.616332	2046.725049
Re2Te5_mp-583070	14.40362948	8.65547065	5.514715466	4.603959512	4.800854164	5.563355632	6.8116686	8.898365326	12.45515276	18.19703353	26.91459854	39.8738058	59.37485942	89.10593442	134.5575715	203.7317433	306.9372132	454.203007	651.9004056	900.1443729	1184.968014	1467.918918	1704.050137	1882.553664
Si3N4_mp-583712	23.46800696	12.51226649	6.838160387	4.898645469	4.925802955	6.248692022	8.715580834	12.41263661	17.74487371	25.48862303	36.94604353	54.47884023	82.0151479	124.9714594	190.1086576	286.9966614	430.459348	638.8145867	924.3132954	1281.126204	1678.784068	2062.251496	2368.683488	2566.970573
CuO2_mp-601195	20.79973617	11.86272263	6.80241253	4.863348886	4.318282268	4.472346007	5.212853513	6.708918925	9.225328694	13.07952097	18.89245318	28.02466877	42.70956286	65.76169437	100.6238623	152.6604372	230.3337208	343.2112789	496.8044111	688.1941703	903.5496534	1117.914934	1307.490046	1463.538081
Te2Mo_mp-602	14.11364249	8.451011104	5.404618946	4.60066017	4.99479676	6.041354072	7.577887206	9.923093555	13.80517558	20.13803874	29.94769994	44.71226099	66.98768314	100.9150118	152.6768379	231.1244998	347.5428945	513.1615715	735.7779462	1016.537304	1340.310206	1662.975503	1930.856424	2129.956742
Nb2O5_mp-604	30.63747241	17.65825608	9.435721533	6.057968527	5.179977688	5.567698913	6.834286185	9.0758611	12.73280462	18.44740245	27.04597957	39.91947764	59.56690865	89.79052628	135.7214438	204.5497196	306.5152815	453.3281776	652.5811868	901.7108277	1183.792051	1463.123296	1691.953549	1840.902022
Pb2O3_mp-608439	21.78499541	12.25996478	6.893889423	5.004660048	4.686814551	5.103980909	6.060151454	7.800677684	10.85251068	15.84223292	23.43673224	34.65135597	51.39133311	76.83502874	115.7304205	174.8154702	262.5660937	387.1720022	553.8676861	762.8474392	1003.202613	1244.594648	1450.841593	1613.573006
BiBr3_mp-610430	24.23739583	13.55484804	8.145018855	6.305772875	6.398666111	7.587452896	9.500225159	12.28710083	16.68868203	23.81721353	35.01231942	52.15108788	78.34456455	118.5325446	179.9647265	273.2270818	412.9251096	614.61142	886.7913135	1223.137997	1597.098911	1956.063497	2233.711426	2396.985558
PS_mp-612	19.94257837	11.05482977	6.418958358	4.913227411	5.224126837	6.869567309	9.742287959	13.93034797	19.89003272	28.51287691	41.26835143	60.79799406	91.55436942	139.8609388	213.8617342	325.0398208	490.6244536	731.3183592	1060.444369	1470.463966	1925.071395	2358.009423	2692.678029	2890.977438
WO2_mp-616585	22.55384398	13.839239	7.917960937	5.437289205	4.595616391	4.568745043	5.221873482	6.794668878	9.698597641	14.34872253	21.19687641	31.18301913	46.19262889	69.16640385	104.30007	157.6919464	237.311977	350.6354035	501.1623256	686.5015641	894.9147851	1100.375173	1273.907083	1405.695765
PtO2_mp-617	30.63309729	17.42891067	9.071853294	5.770127936	4.74775137	4.729039468	5.376033738	6.855776628	9.618267057	14.19527981	21.06796509	30.93045781	45.29562943	66.94246421	100.1326432	150.7988939	226.1479181	332.8742691	475.0340269	652.7900918	857.9458113	1066.037546	1244.417922	1380.463972
In4Te3_mp-617281	11.9115923	7.300459093	4.902825984	4.347008516	4.794500145	5.865718016	7.560055214	10.24431713	14.5173544	21.08332031	30.97631389	46.14840389	69.80060102	106.2098314	161.0029055	242.8014169	364.337107	539.654119	778.1225743	1078.732424	1421.564939	1759.689224	2040.971779	2246.825236
Gd2Br3_mp-618813	11.62808371	7.764724629	5.407379369	4.764200654	5.108417414	6.086052219	7.759273599	10.56936973	15.16802065	22.26449456	32.86741394	49.00046991	74.1916883	113.4023598	173.3143589	263.8601079	398.9935507	593.0935337	854.0473708	1177.32816	1537.40327	1879.398413	2143.31883	2306.607762
MoCl2_mp-620029	19.1591154	11.11350906	6.651638592	5.114420454	5.292308041	6.621746795	8.913285726	12.29802594	17.35003311	25.01313055	36.59972644	54.26371181	81.66837235	124.2555903	189.3658839	287.3730324	433.1541456	643.7836027	930.2060285	1287.779807	1689.405927	2079.951443	2389.407547	2578.983884
PbN6_mp-620058	33.79587863	18.20991092	9.381715224	6.040209504	5.263361616	5.732957785	7.04237191	9.279708892	12.89895723	18.58439478	27.2393098	40.34075869	60.43095276	91.29041156	138.0043525	207.7558351	310.7875302	458.7514445	659.2346356	909.707105	1192.595243	1471.145112	1699.934646	1856.993747
GeS2_mp-622213	19.34656796	10.69395923	6.16270629	4.729951505	4.985477806	6.37253836	8.733917398	12.21840027	17.39189763	25.16621916	36.82369094	54.51996323	81.94887107	124.6196451	190.0557785	288.9535709	436.4441853	649.6077799	939.4500674	1301.405272	1706.54418	2095.704966	2400.130949	2591.913283
V3O7_mp-622640	26.11194145	15.08942146	8.237831463	5.63292288	4.985507673	5.286697197	6.323875073	8.355440598	11.92430213	17.69090959	26.44937032	39.56919396	59.54075841	90.18090932	136.8367598	207.1364942	311.2647067	459.6806478	658.7421187	906.2891456	1184.377842	1452.832032	1668.704917	1822.226401
SiC_mp-624397	23.99318903	13.37607581	7.118821544	4.804302464	4.425491852	5.101363444	6.616083235	9.142786806	13.17084609	19.39211154	28.72028232	42.72155689	64.16679768	97.20966641	147.4662802	222.8816141	334.7669535	496.1520952	716.2247553	993.6508576	1309.544188	1621.348541	1876.599782	2050.769541
CdI2_mp-624400	16.99031899	10.12787366	6.511649273	5.394934127	5.769872824	7.055613699	8.973880402	11.73496254	16.13372392	23.31795335	34.60578295	51.75429574	77.69674004	117.2594629	177.7108089	269.6028365	407.0572076	604.799053	871.6626966	1204.638682	1582.190624	1953.648302	2249.25117	2430.767244
Ta2O5_mp-624688	39.55078102	22.49552163	11.64510412	7.056772201	5.56219835	5.45467356	6.154492161	7.682125788	10.40803874	14.87012315	21.70018966	31.87682682	47.18936647	70.48959185	105.7655633	158.5888764	236.5716937	347.9681938	497.8628493	684.7772287	898.3029428	1114.743671	1299.833771	1431.10831
V2O5_mp-624689	26.60349385	14.79913264	7.82026873	5.266045208	4.728290424	5.190227874	6.426020391	8.675842988	12.48987467	18.54947443	27.65029931	41.14511781	61.55912711	92.88409059	140.7991298	213.3684487	321.3368191	475.9359027	684.3300897	944.6870187	1238.439493	1523.144347	1751.451085	1910.383049
CdI2_mp-627557	16.9355723	10.09647529	6.491643247	5.381313838	5.759255788	7.046078456	8.964420378	11.72520233	16.12320718	23.30493386	34.58575424	51.71876481	77.63296454	117.1519048	177.5439345	269.3595339	406.7057449	604.2798635	870.9087853	1203.627861	1580.947703	1952.180206	2247.589703	2429.126739
Ga2I3_mp-636675	17.76764413	9.894993743	6.072957646	4.98876289	5.449695411	6.89092601	9.029002738	12.00176044	16.5330802	23.75014298	35.05232738	52.4217827	79.06792751	119.9576439	182.298362	276.6103574	417.4271305	620.4348725	895.2122767	1237.680416	1622.659637	1996.286638	2292.423431	2483.188922
TiO2_mp-636827	20.39183274	11.1805921	6.411065144	4.779297613	4.980202709	6.544640963	9.41454185	13.68575756	19.73394456	28.33043161	40.83771346	59.80120693	89.5038844	135.8600074	206.2159034	310.9983339	466.6401702	693.7290913	1005.727403	1394.903311	1826.763319	2242.325703	2572.318436	2776.154754
Bi2O3_mp-636934	26.28740834	14.0667636	7.570406628	5.318234239	4.898418167	5.303260704	6.265587836	7.998675087	11.02928388	16.00991574	23.64563138	34.97142283	51.88472067	77.55696285	116.7534378	176.2695799	264.7161847	390.4599045	558.6357377	768.6306547	1008.197048	1246.061791	1446.180518	1601.722141
CaC2_mp-642822	17.05500367	9.53679825	5.489748972	4.106703062	4.252926518	5.480824857	7.693185747	10.98580816	15.76567932	22.80908221	33.38883554	49.74153257	75.52455105	115.7247362	176.480138	266.4421282	399.175671	591.8257382	856.7953011	1191.214302	1570.691165	1947.357435	2261.981497	2480.053992
C7F3_mp-645316	37.1081814	19.61216948	9.562259765	5.871717706	4.849672743	5.003809433	5.957057179	7.871681475	11.2203935	16.61690566	24.80338575	37.03141273	55.5757986	83.94290215	127.026846	191.7914002	287.6991079	424.8390506	609.6389679	840.1261463	1099.412962	1350.583959	1553.839839	1699.82163
CdI2_mp-647489	17.02264429	10.14820121	6.52457426	5.402808112	5.774386447	7.057546634	8.97373293	11.73296128	16.12963235	23.31124539	34.59593375	51.74081303	77.67871535	117.2341635	177.6710148	269.5354795	406.9477775	604.6379083	871.4370508	1204.314584	1581.736854	1953.102438	2248.682893	2430.121148
SeBr4_mp-651332	21.70649198	12.01293997	7.104058529	5.594976295	5.948612512	7.494959497	9.961652508	13.48488542	18.75597737	26.86522896	39.22729008	58.04350907	87.07308382	132.1441715	201.5654247	307.2632031	465.6235248	694.2370829	1003.153317	1385.305168	1807.796503	2205.52492	2503.520545	2673.560922
SnSe2_mp-665	15.82058477	9.097094772	5.615369568	4.65707577	4.971852389	5.99766238	7.611054993	10.12762285	14.2087735	20.6808281	30.57789927	45.6008362	68.65296857	104.0890546	158.088677	239.6418988	360.8014194	533.9331547	766.855967	1057.939503	1386.832444	1705.902225	1964.914992	2156.243852
SeCl4_mp-667320	23.27386022	13.58687129	8.213072473	6.254580702	6.427872084	8.117273252	11.10779149	15.44757845	21.63562722	30.66213487	44.12852044	64.89157644	97.81891468	149.9090325	230.1557288	351.0794895	531.4845196	794.0108375	1152.346985	1595.727539	2082.617398	2541.33798	2884.978239	3061.19205
CdI2_mp-669326	17.02447901	10.14870707	6.525148025	5.40329421	5.775020837	7.058825497	8.976178877	11.73694183	16.13555985	23.31990112	34.60870656	51.75998648	77.70787316	117.2785146	177.737689	269.6350536	407.0982414	604.8677346	871.7790257	1204.790493	1582.350495	1953.84557	2249.524554	2430.986065
CdI2_mp-669340	16.8191763	10.02804411	6.447385247	5.352712846	5.739272437	7.029868793	8.948426153	11.70752564	16.10266946	23.27857714	34.54620346	51.65221419	77.51861062	116.9649785	177.2623625	268.9601699	406.1313446	603.4051134	869.5938357	1201.848741	1578.773575	1949.568479	2244.533608	2426.173752
CdI2_mp-669358	16.93506162	10.09578282	6.491609641	5.381169594	5.759091238	7.046510124	8.966245595	11.72901786	16.12952404	23.31449104	34.59965624	51.73867742	77.66159709	117.1934884	177.6046114	269.4491707	406.8428549	604.4955267	871.2387044	1204.093587	1581.552513	1952.92322	2248.446778	2430.004546
CdS_mp-672	14.17502512	8.976261295	5.798372877	4.858972775	5.205712554	6.347159401	8.199302419	11.14032193	15.95276299	23.60483295	35.2213898	52.61660408	79.09782992	119.9673192	182.9176668	278.7653545	421.3177696	624.3368977	896.8079898	1238.127908	1626.363244	2003.949799	2301.987844	2498.017591
Ga3Ru_mp-672204	15.26223501	9.274283943	5.883965123	4.877361354	5.109387818	6.028044799	7.54032988	9.992890265	14.05476201	20.55121412	30.52818358	45.71608912	69.01328387	104.6109451	158.2522226	238.2416316	355.8921496	523.1872346	748.6689282	1033.459726	1362.399067	1693.601191	1977.907393	2200.604856
Ge3N4_mp-672289	25.47726871	14.04092298	7.469981657	5.047806416	4.629225403	5.268824527	6.711254046	9.113140565	12.95982747	18.92322897	27.83768848	41.09229596	61.20231485	92.07452147	139.1550358	210.1577134	315.7461934	467.7073108	673.8447859	932.4060903	1226.185549	1516.550234	1755.389095	1920.60974
YbS2_mp-672705	18.52404361	10.98761196	6.599048463	5.126556242	5.185692574	6.084196644	7.607957213	10.0078712	13.9548921	20.34785781	30.23873297	45.18301287	67.88971863	102.7017556	155.9299892	236.4404341	355.6845005	525.3838845	753.413993	1039.602105	1367.030521	1690.669008	1953.748025	2135.19852
CdI2_mp-680092	16.82474725	10.03092893	6.449388837	5.354084436	5.740435814	7.031324544	8.950633476	11.7107752	16.10725611	23.28510776	34.55585453	51.66699176	77.54161978	117.0005088	177.3158333	269.0392551	406.2497316	603.5857191	869.8629257	1202.221384	1579.249875	1950.144538	2245.189254	2426.840331
CdI2_mp-680119	17.01247936	10.1414969	6.520483702	5.400344787	5.773093167	7.057466408	8.975045877	11.73584294	16.13441303	23.31853368	34.60663526	51.75626489	77.70107865	117.2671046	177.7207749	269.6122438	407.0666287	604.8186193	871.702932	1204.689179	1582.23258	1953.703532	2249.349981	2430.826724
CdI2_mp-680144	16.80595361	10.02254262	6.443592193	5.34932029	5.735067316	7.023581777	8.939154682	11.69477615	16.0854925	23.25450868	34.51023265	51.5956636	77.42815586	116.8221473	177.0429638	268.6303592	405.6376983	602.6671216	868.5184371	1200.368951	1576.876727	1947.297749	2242.000575	2423.566257
CdI2_mp-680153	16.87782122	10.06436364	6.470946441	5.366911843	5.747370001	7.034144436	8.950853326	11.70926105	16.1039062	23.27933469	34.54707581	51.65467892	77.52479278	116.9756598	177.272634	268.9594562	406.1182364	603.4043171	869.630738	1201.891035	1578.769361	1949.585552	2244.664226	2426.184282
Li3As7_mp-680395	16.4592545	9.081521328	5.376773404	4.355270679	4.716329561	5.9187542	7.789803035	10.5455467	14.82548922	21.56174409	32.00741877	48.14984474	73.20015623	111.7627704	170.0732134	257.0742683	385.2664515	568.6579713	817.6869725	1132.942523	1494.743002	1853.805009	2154.818748	2385.011815
CBr4_mp-680422	24.39178572	13.77580251	8.288947936	6.335695511	6.504428064	8.128446257	10.94347486	15.00628121	20.89573513	29.68252583	42.93808774	63.27676623	95.10257703	144.8422238	220.9940257	335.6755139	507.0157717	756.3710025	1095.924994	1514.545082	1973.257688	2406.574618	2735.117088	2911.331149
Rb4Pb9_mp-680463	8.703679445	5.752515807	4.36703763	4.45244385	5.515283968	7.179463722	9.322611747	12.35036517	17.11468544	24.72666474	36.7207622	55.57819723	85.04801384	129.9734902	196.6216994	294.5573189	438.0311705	643.6500509	925.4295654	1288.808102	1716.13797	2148.967266	2513.185364	2778.877662
Tl2Te3_mp-680731	12.23887045	7.426346197	4.980992738	4.478500065	5.014028074	6.079744109	7.539459207	9.748533794	13.42832772	19.45488692	28.85605848	43.16532937	64.9158888	97.9744494	147.9992858	223.2987264	334.8453822	493.8957676	708.6632402	981.0500387	1296.758821	1612.761257	1877.865706	2080.403422
CdI2_mp-684029	16.88930634	10.06951816	6.474571624	5.369840842	5.750602044	7.038820652	8.95790103	11.71924209	16.11763974	23.29874862	34.57599185	51.699661	77.59596148	117.087099	177.4427169	269.2140768	406.4996685	603.9781971	870.4727087	1203.052289	1580.257389	1951.372704	2246.669927	2428.242678
Al2S3_mp-684638	17.57032036	9.834378779	5.67121422	4.389057108	4.634507647	5.87949255	8.010427103	11.25104801	16.20936319	23.77700374	35.18071025	52.50877237	79.35510806	121.0638365	184.9364896	281.3283905	424.6785469	631.1827993	912.1139689	1265.431863	1664.759804	2050.858216	2356.735945	2560.912381
P4S5_mp-690	19.85771338	10.99996249	6.382721084	4.891174241	5.210166861	6.861229348	9.741244334	13.94383198	19.92998459	28.59047329	41.38723236	60.95217218	91.73524454	140.0798467	214.191717	325.6484318	491.7497506	733.1987434	1063.293767	1474.508348	1930.389942	2364.114884	2698.612132	2896.164279
SnSe_mp-691	16.45990617	9.252287209	5.602709804	4.600958167	4.95587663	6.073792903	7.753344905	10.25112022	14.26162061	20.70779355	30.67081018	45.73534727	68.59529222	103.5225706	156.8097259	237.5059728	357.4107951	528.5279315	758.8011817	1047.715501	1377.015991	1700.395525	1964.857467	2159.318744
HgF_mp-706	30.95811746	17.90500656	9.711686098	6.370493834	5.33463175	5.316428268	5.92876149	7.329613815	10.00372573	14.55908658	21.56502001	31.72773592	46.48242415	68.53661149	102.139663	153.2559085	229.1878536	336.812901	480.326881	660.0262242	868.4525108	1081.937767	1265.208888	1399.847268
V4O9_mp-715664	21.31480307	13.01570426	7.605841559	5.441854209	4.842267435	5.046700038	5.944372944	7.800820697	11.06510403	16.24471392	24.04440753	35.86544249	54.16390973	82.37023819	125.0399978	188.962194	283.8531248	419.9368846	602.8407765	829.0942702	1081.126293	1324.048994	1522.956689	1668.422573
P4S5_mp-7260	20.79858613	11.67727761	6.81740233	5.174831496	5.419943026	7.024509194	9.850158468	13.9689941	19.83284592	28.34122989	40.9854525	60.43951213	91.1925065	139.5794294	213.6666735	324.7661014	489.990352	730.0902026	1058.376211	1466.981086	1919.572606	2350.836961	2684.237665	2879.104466
ZnAs2_mp-7262	13.00315045	8.523977645	5.713185911	4.814852138	4.983530116	5.828765376	7.402547681	10.11620573	14.56717675	21.39091248	31.50885559	46.83926534	70.75361519	107.9623712	164.76037	250.5512621	378.7469614	563.4068886	812.361916	1121.291556	1466.324427	1797.520329	2061.00302	2235.631889
BaSi2_mp-7275	12.39989433	7.984150813	5.532074715	4.895392373	5.254024283	6.208973598	7.751153252	10.19364703	14.02582646	19.91024786	29.07812918	43.91421401	68.00561582	105.3959677	160.4360556	240.116652	356.6187042	525.1160772	756.7772355	1051.485858	1390.340095	1730.622454	2024.634357	2247.618536
NdP5_mp-7332	11.84481491	7.496830964	4.926363347	4.099635321	4.22205721	4.96837837	6.398137018	8.842505923	12.73596359	18.52537528	27.00252617	39.96017286	60.43501182	92.38417477	140.8586347	213.7710506	323.3851105	483.5352245	702.5232383	976.518098	1284.07322	1583.385728	1830.889786	2006.770627
Li3P_mp-736	14.99921349	8.661492246	5.395435464	4.554306231	5.01040413	6.247494025	8.088678446	10.74888914	14.85804901	21.41547377	32.0026858	49.2748241	77.17817606	120.4599436	184.4463457	276.8935922	410.5036454	601.8096734	865.5247754	1206.303317	1606.069144	2014.453731	2375.078762	2672.464444
BaO_mp-7487	18.34047692	10.54342548	6.448743401	4.984841251	5.067148751	6.114506883	7.851591819	10.34171906	14.11967593	20.113998	29.61798188	44.59807449	68.14046531	104.5690546	159.4582095	240.7290897	360.3350409	532.6588723	767.3883934	1061.826383	1397.385426	1736.395592	2026.72293	2232.750653
SmN_mp-749	12.0828679	8.615506476	5.990026912	4.969318681	4.901814367	5.468395377	6.778627771	9.258822294	13.46250427	19.91299703	29.36212502	43.53317086	65.54243496	99.70124733	151.7063375	230.1336391	347.3134262	516.0546292	743.2088259	1024.916095	1340.88654	1647.213118	1891.909564	2045.398562
BaSe2_mp-7547	13.55233111	7.949981042	5.158521692	4.578993975	5.254836658	6.682001793	8.636316004	11.38301305	15.70632194	22.70432475	33.77864412	51.02325084	77.75955199	118.8531302	181.1103417	274.3041582	411.6190841	607.2105119	871.4771661	1205.314348	1587.898101	1964.100624	2271.041173	2495.391298
BaSe3_mp-7548	13.50281028	8.004900671	5.171836108	4.52377134	5.086805525	6.376624158	8.244064408	10.99813812	15.37744241	22.35897793	33.18272825	49.80221012	75.44607418	114.9047776	174.9198599	265.2232247	398.905477	589.7634199	847.4096081	1171.738632	1541.447554	1902.606168	2195.398376	2407.725643
MgAs4_mp-7623	15.80373303	9.054081746	5.552096439	4.586727857	4.919233245	6.009465107	7.738943887	10.4066488	14.66299561	21.35761288	31.62476299	47.37051587	71.75633711	109.3130397	166.2224149	251.4827411	377.5858677	557.9971701	801.8884852	1108.336505	1456.492206	1797.291359	2078.882015	2291.934426
K2S3_mp-7667	11.5342541	6.887685207	4.561458898	4.194215354	5.126738444	7.085183462	9.92014286	13.81203201	19.52057207	28.33663906	42.22194075	64.41185992	99.96651688	155.7041147	240.2092019	365.5201523	549.200708	812.1803907	1170.958254	1626.253419	2145.449579	2649.518776	3051.021394	3326.260573
K2Se3_mp-7670	10.72312486	6.815071772	4.846143987	4.669425419	5.670500684	7.483727843	9.959050426	13.40918388	18.65222996	26.89961927	39.99602573	61.05785562	94.85152676	147.4540963	226.2658076	342.0564413	511.1066949	752.7452396	1082.001005	1499.870018	1977.311082	2442.881026	2819.20267	3085.721372
SiB6_mp-7700	19.05398655	11.24112422	6.565943565	4.787164751	4.365477949	4.646673149	5.538487828	7.265842352	10.19986194	14.78051782	21.71095389	32.39986188	49.14246554	74.84778126	113.1280033	169.6674661	253.4751457	375.1142104	541.9177562	753.2639803	995.8986022	1241.231068	1459.578893	1640.290454
HgO_mp-7826	25.34960825	15.19302358	8.526228156	5.844885491	5.036562474	5.05924405	5.655840813	7.053147286	9.753239053	14.34435092	21.36179264	31.51368805	46.3010932	68.55040954	102.6869228	154.8411436	232.2114261	341.1782081	485.7064598	666.8226929	877.5521199	1093.13368	1279.046575	1421.96112
Mg3As2_mp-7844	13.529604	7.607028302	4.709532427	4.053981544	4.679862536	6.197859343	8.455260509	11.64260665	16.42910077	23.87422307	35.50080809	53.76087777	82.49949149	126.9837616	194.0514402	293.4925163	439.4871891	648.6752689	934.2181481	1297.766609	1716.670956	2133.371322	2483.155088	2749.725031
Nd2O3_mp-7954	21.08253573	12.20856483	7.002394575	5.165579198	5.001329754	5.717603844	7.102656712	9.403270015	13.23952203	19.41854557	28.86507474	42.98409465	64.30383232	96.91353108	146.7566603	222.1925653	334.0392569	493.3740146	707.608599	976.5272968	1284.265468	1589.0475	1838.857559	2014.923362
Li3Sb_mp-7955	14.27538704	8.551305621	5.621180893	4.943683799	5.475178177	6.672601039	8.352401661	10.76526932	14.54077579	20.63325664	30.5884214	47.04036949	73.82516491	115.3146917	176.1482938	263.3017014	388.7506753	568.2592199	815.8901349	1136.642052	1515.146722	1906.582252	2260.092607	2559.595802
GaN_mp-804	23.72246038	13.04314776	7.003295871	4.847719836	4.515632641	5.124307052	6.442239106	8.654336802	12.27288318	17.98620212	26.62586294	39.52651848	59.06847373	88.95807776	134.4130527	202.809844	304.1033027	449.0201754	644.9107667	891.3197042	1173.475998	1455.06021	1691.755041	1867.165191
SiC_mp-8062	23.35286265	12.90162357	6.874279714	4.725525595	4.39875263	5.038880476	6.458932807	8.883719147	12.85367119	19.07893709	28.44097146	42.4265947	63.70293551	96.3516659	146.043432	220.8530043	331.9226601	491.5768289	708.4674908	981.8273442	1293.34685	1599.788072	1850.803493	2029.191347
Mg3P2_mp-8085	13.85189187	7.702071363	4.651065407	3.897472388	4.461429323	5.990146569	8.368348393	11.75622606	16.76322487	24.42124091	36.28514847	54.92600796	84.41060606	130.2827741	199.6076336	302.4120073	453.497162	670.6981125	968.1759579	1347.070724	1782.603054	2214.442749	2574.091875	2840.740079
CsTe_mp-8361	7.386716531	4.846657741	3.774812176	4.108425664	5.592400518	7.908970409	10.68629747	14.15058082	19.35225767	27.86992779	41.8052715	64.22365071	99.62639375	154.101394	235.7542223	356.3334356	532.4446899	783.3493207	1125.935743	1566.906797	2082.97282	2598.513367	3020.359852	3321.390423
ZnO2_mp-8484	30.54429107	19.2438043	10.37303824	6.422564701	5.149208579	5.174672751	6.080984835	8.007662285	11.43342765	16.9723884	25.28028676	37.43238787	55.60437291	83.44866384	126.1903805	191.0275764	287.4102572	425.358433	611.4976142	845.0752512	1112.372474	1377.855521	1590.651663	1719.316696
Te4Mo3_mp-8601	11.66989222	7.674760479	5.258060033	4.532119947	4.752533842	5.592229054	7.136575395	9.799108044	14.14087186	20.73535407	30.4558212	45.18212653	68.15685328	103.7497449	157.6914006	238.7524259	359.8423456	534.8254953	771.8972035	1068.138442	1402.684326	1729.267345	1994.380984	2170.989663
Sc2Ni_mp-867501	8.783703618	6.615468259	5.181851936	4.995410379	5.693902179	7.072802431	9.27449205	12.79355728	18.30639409	26.61962486	39.19775975	59.06212347	91.01049079	140.8190012	215.1414277	324.3335072	485.3945347	718.6781252	1038.263719	1442.044388	1900.64574	2348.045939	2706.096046	2926.949937
CoF3_mp-867808	20.55125639	12.81185242	7.400966889	5.15984675	4.497384354	4.674408013	5.601859426	7.577655064	11.08769862	16.60437037	24.64647398	36.35799946	54.06615556	81.40553412	123.5750645	188.226142	285.6339798	425.7641308	613.0069653	842.0693497	1093.222546	1328.785012	1511.154527	1630.594993
La10Se19_mp-8866	12.57777769	7.810391957	5.226525643	4.624531967	5.12783855	6.288851548	8.037076753	10.74050581	15.10463518	22.00460017	32.59714348	48.84900514	74.02719704	112.7931993	171.5223516	259.5516703	389.7832838	575.920236	827.2658165	1143.362313	1503.505345	1856.167657	2144.09391	2352.255255
SnSe_mp-8936	15.99167252	8.44672201	5.057823078	4.276071093	4.890409611	6.411061289	8.60578525	11.64246571	16.23529525	23.45692366	34.63991951	51.71701118	77.82481833	117.7790936	178.6046947	270.6017548	407.7816882	605.0757629	872.3458642	1207.595613	1586.701988	1954.507453	2250.458827	2463.203214
TiS2_mp-9027	12.59425173	8.237363508	5.514611508	4.580641688	4.629129497	5.304332922	6.654163131	8.999517894	12.76282192	18.41637654	26.85238434	40.01856812	61.08075891	93.94245342	143.2887731	216.5157741	325.5353135	484.0274375	699.9919003	968.7900884	1268.12579	1556.594152	1792.201213	1955.360341
CaP3_mp-9122	11.19316689	7.078414467	4.752850418	4.092046328	4.362839336	5.26096054	6.833612381	9.390517308	13.35662592	19.23333949	27.98776021	41.68778682	63.64317597	97.89535076	149.2783708	225.5167267	339.3215188	505.8627749	735.1778962	1024.383875	1351.280625	1672.147251	1942.009378	2140.209008
TiO2_mp-9173	28.81651637	16.84486976	9.102585155	5.912862548	5.131782991	5.61227066	7.000978399	9.401363096	13.25830833	19.24272784	28.27462766	41.94541724	63.06022105	95.77343565	145.5505596	220.0034107	330.19093	489.1341415	705.6264025	977.0366762	1284.158389	1586.720264	1831.619795	1986.260454
TcS2_mp-9481	16.88242833	9.847951969	5.888414402	4.656574311	4.844697469	5.885075594	7.673949465	10.52876333	15.13188198	22.34067824	33.1855942	49.38649531	74.05721525	112.0868043	170.4901026	259.2626059	391.5662144	580.9040316	835.8541744	1154.458029	1514.035255	1861.246668	2136.821876	2325.986782
BaB6_mp-954	16.99690725	10.41599687	6.401785263	4.845695864	4.476374045	4.738573335	5.572762745	7.192992019	9.919745561	14.14450067	20.58544263	30.72001295	46.86040525	71.72568677	108.4461856	162.0983864	241.2324587	356.20909	514.4208739	715.8467762	949.2461471	1189.615892	1409.329659	1593.719515
Tm2S3_mp-974	13.37579746	8.76442567	5.839378107	4.950174332	5.208857648	6.14859672	7.7475806	10.42757752	14.92007774	22.06258385	32.84595373	48.99025042	73.62845534	111.6090368	169.8520736	258.2581936	389.7162747	576.9614729	827.7330606	1140.472725	1494.309159	1837.166117	2108.987255	2290.714376
RuF4_mp-974434	21.24097522	13.15869693	7.540421823	5.123128221	4.276757768	4.253568595	4.93962936	6.557520861	9.462597765	13.98324564	20.54318632	30.18508064	44.93451768	67.75345085	102.7344453	156.0549291	236.3551267	352.108624	506.6072224	694.4992552	899.4778178	1093.150232	1248.227585	1356.253142
Sr2Sn_mp-978	9.20126159	6.154603608	4.710535903	4.803093993	5.958064436	7.849425256	10.38834616	13.9373169	19.26618265	27.5027848	40.55568794	61.82835741	96.31932607	149.6949093	228.1065556	341.2141644	505.556839	742.0968246	1067.909385	1486.093109	1970.951308	2455.316234	2860.703335	3150.801382
SiAs2_mp-978553	17.47878735	9.781247936	5.803927554	4.639250831	4.855524034	5.855022224	7.509003838	10.10360362	14.26303276	20.79612745	30.76876928	45.98174497	69.46897288	105.6461922	160.5984175	243.1665374	365.5255202	540.6499431	777.0776027	1073.236335	1408.239723	1734.541005	2002.874566	2205.724879
WS2_mp-9813	22.75554493	12.79011301	7.230365875	5.297662155	5.09237831	5.745524776	7.001815534	9.084225932	12.59285218	18.31269886	27.13018211	40.33546953	60.21302599	90.49319557	136.6746693	206.5343611	310.0603321	457.2752656	654.5956179	901.4444154	1183.36149	1463.003675	1694.571817	1863.561568
PrP5_mp-9848	11.75594624	7.443707185	4.896958481	4.075963821	4.194772295	4.933741905	6.354631054	8.784805356	12.64759535	18.3764333	26.75759054	39.5853232	59.88855656	91.58801902	139.6619801	211.9393161	320.6339714	479.5771067	697.0534611	969.1532903	1274.478353	1571.681248	1817.736819	1992.586652
HoP5_mp-9851	12.46584088	7.823289845	5.071369729	4.178306488	4.283073239	5.0268751	6.455818266	8.911763053	12.86813569	18.81353892	27.52908327	40.73708621	61.4183342	93.59437171	142.542419	216.3997827	327.3809913	488.9693492	709.2476549	984.758581	1294.496481	1596.047656	1844.890351	2022.844923
YP5_mp-9854	12.55396831	7.699407583	4.971988979	4.14513243	4.331400235	5.166479724	6.67651148	9.178255426	13.13102833	19.05482551	27.83899858	41.36360739	62.74516922	96.01725491	146.285765	221.5051456	334.0436249	498.0700876	722.616879	1004.667353	1322.673994	1633.52303	1893.350476	2085.795697
GaS_mp-9889	16.94754051	9.222378016	5.346437899	4.217134231	4.576085782	5.955055864	8.221942281	11.53860399	16.48423007	23.97070842	35.24071824	52.32018398	78.64061479	119.3313603	181.4821704	275.2594162	414.9481422	616.5636664	890.8740884	1235.166743	1624.15802	2002.968879	2308.150081	2517.136564
Te3As2_mp-9897	13.5092716	8.217424995	5.303537377	4.451815829	4.662093606	5.494252905	6.940553852	9.353455708	13.29398403	19.39112844	28.51635501	42.34955299	63.78575821	96.90846429	147.282654	223.2664267	336.6723268	499.8533485	720.0342888	994.2916569	1302.340838	1600.203147	1841.562853	2013.470335
Ba2Si_mp-9905	9.950749489	6.61836905	4.969523693	4.89878936	5.831248294	7.404867656	9.556283333	12.64073822	17.3358664	24.62050089	36.2064223	55.19884741	86.1274629	133.9724501	203.9271686	304.3318993	450.0153189	660.1190571	950.4294994	1324.369872	1760.47051	2201.311656	2578.085589	2854.787716
ZnS_mp-9946	16.61880189	10.3955463	6.327256255	4.83262042	4.867540883	5.883102192	7.754303979	10.74126483	15.49354959	22.88535185	33.95815956	50.40561906	75.36623573	113.8790321	173.0959504	262.9681233	396.7215099	588.57043	848.2306907	1174.978997	1548.831564	1918.455303	2213.926801	2396.922054
GaTe_mp-10009	14.378183	8.127142356	5.07309063	4.345601489	4.831392003	6.023545051	7.770281378	10.35592694	14.4620419	20.98382358	31.05039082	46.43724893	70.06674018	106.2580748	161.1232104	243.6125579	365.9152141	540.9884127	777.9702706	1077.145725	1419.842456	1758.541622	2041.302265	2259.662944
SnS_mp-10013	15.05939149	8.848064284	5.582836217	4.62235997	4.806569384	5.643948535	7.091853325	9.45306409	13.22860349	19.03423734	27.85666146	41.60337734	63.35650426	97.10771966	147.9098909	223.4948115	335.5756591	497.2243384	716.5690382	990.6862765	1298.892758	1598.957734	1848.832489	2037.552648
Ba5Sb4_mp-10089	9.138953175	6.028237423	4.541568324	4.585963107	5.659308981	7.414220251	9.751649006	13.05932587	18.15501139	26.15339339	38.73395266	58.76429364	90.56722857	139.4919283	212.0685835	318.2856183	473.6570543	696.6640968	1002.133053	1393.259993	1846.901205	2298.72162	2672.462193	2938.169997
K3Sb_mp-10159	6.807572397	4.659476356	3.831027898	4.412401838	6.33421306	9.41686	13.28146999	18.03866219	24.73845984	35.28659245	52.7767758	82.31121964	131.2264853	207.873481	320.9010552	482.7903999	714.992767	1046.586761	1504.824318	2099.573434	2795.911727	3491.260238	4065.630763	4475.996192
Bi2O3_mp-1017552	27.57897567	15.25431827	8.198165644	5.591331077	4.942613007	5.154585059	5.934032729	7.476620534	10.27201104	14.9159557	22.01924481	32.46287729	47.942287	71.39951996	107.2989019	161.9126568	242.9713652	357.7577504	510.6881411	701.6064614	920.6707091	1140.61086	1327.696378	1472.797701
In2Se3_mp-1017565	13.08856098	8.036127202	5.256282338	4.452678057	4.686101004	5.553627049	7.071353586	9.590215274	13.6388734	19.81406578	29.03940677	43.173603	65.31341245	99.56619786	151.2626865	228.5763643	343.6746802	509.8464075	735.1290032	1016.535724	1333.305102	1641.697588	1895.529029	2078.362742
BaC2_mp-1018141	18.81942163	10.11771134	5.742169856	4.420459032	4.567880881	5.532168702	7.107705634	9.481635312	13.23118837	19.19860611	28.50455225	42.89357135	65.15594082	99.26898759	150.5868475	226.7833687	338.657299	498.4625435	715.6348056	991.5905803	1311.082777	1633.815228	1913.032631	2137.006242
Nb2O5_mp-10426	29.25834047	16.55199213	8.657289132	5.600812175	4.834926027	5.178129631	6.311483135	8.40531943	11.95674257	17.6094558	26.0926122	38.59269151	57.36398087	86.0645961	129.9234485	196.2765806	294.8626079	435.9575682	626.1934677	864.278599	1135.061813	1402.332225	1620.390863	1769.051704
Sm10S19_mp-10534	12.30224348	8.155936489	5.554643768	4.820657905	5.179512203	6.235555979	8.007271357	10.93008986	15.72332675	23.21077967	34.47162621	51.51590994	77.89646125	118.8158419	181.4341191	276.1542915	417.1555898	619.031871	890.5218911	1228.529599	1607.738773	1970.467495	2253.249644	2435.60078
TiS2_mp-1062030	15.2868104	9.056660697	5.706523364	4.624829587	4.650464277	5.298334471	6.524102597	8.562001634	11.77210947	16.63491548	24.09892884	36.0971177	55.63204158	86.2495341	131.9807699	199.2150946	298.6777925	443.2344665	641.2027331	889.7273736	1169.972465	1446.472493	1685.002315	1872.810802
YbSe_mp-10648	17.86216428	10.44188702	6.475923051	5.145078739	5.246014903	6.105771771	7.443152491	9.465537892	12.86119907	18.5917374	27.74609935	41.71024282	62.7110258	94.38954016	142.2535923	214.3129978	321.2267149	474.1214374	680.2880733	939.522876	1238.77642	1542.50323	1799.462937	1981.790345
BrCl_mp-1066781	20.95255063	11.39954065	6.587838738	5.179987334	5.568132459	7.121658521	9.631115581	13.26767129	18.6939554	26.93094208	39.36054631	58.27007242	87.61355472	133.4386367	204.2489857	312.1246357	473.4834681	705.8579751	1019.636752	1408.394479	1837.805925	2238.634758	2536.653822	2712.785897
PbS_mp-1067627	16.37013499	8.68465734	5.315224359	4.533026694	5.195053639	6.798098021	9.040235567	12.04279929	16.57674402	23.86372617	35.4156849	53.28448	80.63424484	122.2797002	185.2974463	280.2520069	421.9186563	626.4268921	904.2117974	1252.294192	1645.4279	2028.006292	2334.66968	2544.43811
Rb2S_mp-1071288	7.121983386	4.38944248	3.191544146	3.281650568	4.492828576	6.795609694	9.982183591	14.01601785	19.61999078	28.28793051	42.27532721	65.05628322	101.8389529	159.548847	246.8325774	375.7999392	564.522951	835.4166266	1207.391434	1684.494186	2239.432276	2797.60704	3263.865647	3596.519455
ZnTe_mp-1071319	11.2719733	7.815168923	5.531379468	4.89428598	5.253219	6.266294167	8.009026897	10.96246146	15.84733604	23.43420057	34.73438961	51.7554826	78.1361051	119.2287398	182.4348426	278.5629253	422.2902727	628.4201572	905.3010423	1249.306669	1635.025675	2004.060301	2289.504249	2464.120277
Ga2Ru_mp-1072429	11.73012171	7.867780727	5.375900714	4.576586661	4.751904408	5.578914397	7.152226202	9.903704189	14.41954395	21.27136656	31.26836809	46.1911892	69.21106263	104.7047857	158.4880545	239.3755165	360.1469129	534.4868401	770.8681481	1067.73747	1406.846851	1744.82747	2029.188028	2230.749213
RbSi_mp-1074	8.988742094	5.363706929	3.745928565	3.734663563	4.933497594	7.168696624	10.20517987	14.11375667	19.68768249	28.38515144	42.40506362	65.20165193	101.9121733	159.1571162	245.0169119	370.9403591	554.2162594	816.3438202	1175.994122	1638.168661	2175.804985	2713.857618	3164.655157	3502.488778
GeSe_mp-10759	14.0512044	8.41929123	5.32912534	4.424498105	4.651850343	5.556944681	7.117105789	9.677740265	13.81906674	20.20782412	29.75685284	44.20017357	66.53758245	101.038903	153.533064	232.7098542	350.8240766	520.8383459	750.6485144	1037.62976	1360.815957	1674.539781	1931.266274	2119.111031
Gd2Cl3_mp-1078829	11.80404332	8.044407422	5.606053957	4.845921378	5.056373273	5.896805563	7.443852924	10.11365693	14.48540449	21.18705483	31.2058174	46.61578755	70.96400856	109.0267693	166.9799434	254.0978597	383.9397974	570.9229367	822.8775539	1134.545378	1480.230526	1807.832635	2061.327009	2216.922207
PbSe_mp-1079172	16.98553306	9.60250527	5.917046212	4.875614311	5.159288337	6.071867678	7.327466715	9.175777988	12.32595882	17.7040039	26.33230923	39.5043652	59.29904451	89.16730845	134.4530196	202.9225746	304.5223254	449.1940823	643.7633219	889.1661843	1173.031815	1458.819284	1699.69272	1882.035885
RbAs_mp-10802	9.190240117	5.688865358	4.097598663	4.145532608	5.399852267	7.579665978	10.41937437	14.1073234	19.54398501	28.17961429	42.09474953	64.52223521	100.2873244	155.7061196	238.7435713	360.836622	538.7625361	792.5395168	1139.078978	1582.811134	2097.411045	2608.751009	3031.14396	3341.992974
NbBr4_mp-1080428	16.60571251	9.64639766	5.964610409	4.93799543	5.273871228	6.384026365	8.134908348	10.85467771	15.24749861	22.20558383	32.85865675	49.07959569	74.08833486	112.7446412	171.9299442	261.5421842	394.6917352	584.6013107	839.0719976	1154.819317	1507.347517	1842.452392	2104.478141	2285.891095
BaF3_mp-1080821	23.6625319	13.31749061	7.406884554	5.296821507	4.902993328	5.345437435	6.443080714	8.455014478	11.91036846	17.4535378	25.8880545	38.60738321	58.08805258	88.07155101	133.8001774	202.8100304	305.193222	451.2592776	647.1668023	890.6466664	1164.010437	1428.270615	1643.172853	1802.287076
SrS_mp-1087	12.0290424	7.092073709	4.61510818	3.980368789	4.618120509	6.306741994	8.912807219	12.47478261	17.53435193	25.17426868	37.03713106	55.75658637	85.51814279	132.164666	203.1883105	309.1576368	465.9684547	692.9392098	1003.640489	1394.874125	1839.305177	2280.341716	2644.576466	2888.227393
GeP_mp-1095275	16.17988029	9.111869363	5.443657929	4.384110345	4.63123277	5.654149724	7.359863319	10.04193346	14.30923771	20.93858342	30.96649107	46.19938602	69.71230792	105.9664768	161.0951821	244.0700735	367.3993183	544.6024646	784.7538009	1086.491157	1428.662566	1763.025949	2039.348452	2248.646565
SnS2_mp-1095397	17.85100444	9.982992039	5.870048891	4.659466849	4.930410169	6.086502991	7.967764774	10.83111127	15.34219774	22.40423707	33.15322113	49.42022386	74.3736791	112.8815136	171.8631243	261.1999542	394.0876284	584.3469927	840.912745	1161.628251	1523.016532	1871.277203	2147.806483	2340.22133
GdS2_mp-1095479	12.1596781	8.142423136	5.557209011	4.775704742	5.040943647	5.977767104	7.633682708	10.44304847	15.07262807	22.25206761	32.96327292	49.13922401	74.21738477	113.1529574	172.7004502	262.788496	397.1801264	590.0926453	849.698998	1172.265068	1533.124706	1878.036632	2147.585522	2320.490214
YbC2_mp-1100	22.65801642	12.87033063	7.166652597	5.105309149	4.719997833	5.135334251	6.139607769	7.968600009	11.16016649	16.38907611	24.42267627	36.43162225	54.49801443	81.92444525	123.4691857	185.8594151	277.8263628	408.3238589	583.7116855	805.1364145	1061.963881	1322.957984	1549.403973	1729.477932
VO2_mp-1100908	19.97621344	12.39949486	7.226627995	5.171819679	4.678441564	5.01806604	6.100450237	8.248785258	12.02317707	18.02809935	26.94123363	40.04979042	59.8445222	90.20019189	136.6221802	207.1102567	312.3995533	463.3200745	665.9864648	917.4461126	1198.837845	1469.042037	1683.928287	1830.778723
CeAs2_mp-1101892	11.16076507	7.563604422	5.295901335	4.638229065	4.926048303	5.853353717	7.519631878	10.36827811	15.00706755	22.06297449	32.47871481	48.26968433	72.93339003	111.2267547	169.3976797	256.9082836	387.5470931	575.9903821	830.6438462	1147.61045	1503.142621	1846.016192	2118.261543	2292.149046
LuN_mp-1102	14.68352641	10.1810149	6.713885129	5.298394293	5.025259087	5.40868594	6.471425497	8.614923115	12.44235677	18.55941675	27.60836078	40.84391423	60.77042731	91.35043409	138.2621235	209.623313	315.8232919	466.6326606	667.4083975	916.9933774	1201.3298	1482.962402	1714.685473	1874.203834
Rb2S_mp-1102384	7.089775861	4.350275362	3.156141449	3.237452903	4.433229799	6.727816147	9.923219187	13.9692383	19.56669647	28.19863692	42.11917044	64.80448871	101.4663573	159.0289671	246.1177568	374.8215927	563.2776108	834.0552975	1206.028279	1682.773817	2236.702245	2793.964779	3260.088975	3592.330549
PrAs2_mp-1102408	11.13016185	7.488718043	5.229376968	4.57610256	4.861927015	5.790339698	7.466577034	10.32754196	14.95865918	21.9577966	32.26118215	47.9111619	72.42871734	110.5374951	168.3843294	255.3542911	385.3152395	573.1554965	827.3262578	1143.538356	1497.591522	1838.544245	2109.233017	2281.624164
ZnP2_mp-11025	16.77759736	9.993958272	5.950113477	4.615079334	4.743375362	5.777429129	7.616714707	10.56556756	15.30339247	22.70692621	33.82985136	50.41826763	75.65907904	114.587034	174.3748308	265.128243	400.2114921	593.7165019	855.2559881	1184.073354	1558.451874	1924.106502	2215.826089	2410.098415
ZnS2_mp-1102743	18.39447894	11.30028273	6.714428022	5.013683498	4.962009396	5.930751272	7.772562437	10.73807441	15.45933013	22.78686207	33.75199864	50.06888366	74.91678245	113.3730389	172.6238695	262.6851249	396.9207353	589.6947412	850.5799433	1177.936515	1549.949834	1913.604505	2199.612706	2372.846086
TbS2_mp-1103226	12.81316123	8.436493595	5.65693523	4.809033361	5.061932186	6.002293933	7.65092932	10.43494266	15.04327723	22.24213697	33.00858001	49.19014134	74.11606944	112.7250582	171.88061	261.5704118	395.3161659	586.8569561	844.1833618	1164.130587	1522.958689	1866.828817	2136.407415	2312.353097
LaS2_mp-1103658	13.41671596	8.219551639	5.363891595	4.640862137	5.106960774	6.306902159	8.164004363	11.02717539	15.59912332	22.78280006	33.80694132	50.78482498	77.22733003	118.1153809	180.169411	273.1516658	410.6639709	607.3918922	873.3101327	1207.249208	1585.716756	1953.12284	2249.543137	2460.58562
P4Os_mp-1103842	17.76419271	10.11772667	5.79239561	4.345807793	4.315585237	5.080265947	6.523618163	8.925314915	12.87685745	19.08076493	28.28426827	41.70645174	61.72302168	92.29699101	139.3107404	211.1671819	318.7418696	473.0302757	681.2514231	943.1269403	1243.095049	1540.767983	1787.872616	1969.651398
Ce2Br5_mp-1104603	11.49693916	7.608658195	5.252334821	4.559128785	4.813462967	5.700657222	7.308177718	10.04233266	14.44929812	21.10701289	30.97331105	46.1311323	70.12928434	107.6858884	164.8770656	250.9604697	379.6698751	565.6209823	816.309898	1125.222918	1465.257502	1784.411186	2028.607708	2175.655007
TeBr6_mp-1104734	13.91459024	8.261532779	5.217459387	4.256688756	4.331384544	5.025737648	6.3512847	8.604426448	12.20072216	17.60247114	25.62876993	38.04963047	57.81780792	88.78490655	135.8679201	206.6779384	312.7618129	466.6068099	674.5388106	930.4581625	1211.216464	1475.756478	1685.534076	1829.566484
I5N2_mp-1105105	15.33326183	8.862187398	5.466180117	4.404332523	4.458914264	5.13791426	6.411293989	8.568665133	12.05914197	17.39871845	25.40585984	37.73824125	57.17181562	87.43268494	133.4094245	202.5777848	305.9659534	455.393745	657.351336	907.5192201	1185.337375	1451.353348	1667.540502	1825.211036
Bi2O3_mp-1105780	28.4357855	15.61990775	8.358245299	5.684361968	5.023594987	5.243821528	6.033872706	7.582321187	10.38252197	15.04451551	22.20435508	32.77161365	48.46488834	72.24355908	108.586492	163.7942947	245.6790755	361.6694543	516.2919165	709.3121644	930.6154568	1152.563062	1340.958533	1486.36685
NaAs_mp-1106381	12.20111674	7.517683497	5.122426353	4.699007165	5.444381376	6.932866882	9.030209455	12.03070207	16.64180716	23.90384742	35.44806188	54.07513201	84.01144895	130.4416095	199.4374568	300.0042122	446.3780613	656.0463944	943.1872874	1310.199454	1734.602858	2158.914928	2520.048471	2799.367954
Zr3N4_mp-11661	18.12372478	11.15054389	6.705591373	5.062298725	4.819665097	5.327790041	6.50726853	8.684868962	12.43475625	18.41223773	27.40808624	40.84118239	61.27750747	92.56231465	140.0419523	211.4454766	317.2062849	468.0706622	670.8488954	924.5941955	1213.464742	1498.906311	1737.381499	1915.311887
Al2Se3_mp-11674	17.7738155	9.847080662	5.77899107	4.531233315	4.841994582	6.194998975	8.411086044	11.62045087	16.40058803	23.69513865	34.80002893	51.78596981	78.10009512	118.8409987	180.9737834	274.4497839	413.4108445	613.9338123	886.815749	1229.143657	1616.059655	1994.095218	2298.823108	2502.541377
WO3_mp-1172828	32.31622744	17.48843517	8.889125123	5.683589619	4.803217768	4.953574995	5.799647486	7.51477243	10.56952545	15.53847554	23.01646153	33.93251765	50.12185945	74.69980918	112.2910955	169.413522	254.3368498	375.1478701	536.6952045	738.0069574	967.0808388	1194.157713	1383.917994	1526.349841
SrS3_mp-1175	15.68529443	9.020809596	5.534205386	4.615460801	5.115479688	6.541089719	8.741623179	11.9674326	16.92854054	24.66486484	36.61446868	55.14234611	84.14277235	129.2391347	198.0253154	301.2669489	453.8403471	672.1341311	967.555735	1338.321365	1756.577977	2158.444106	2475.126974	2691.446229
VO3_mp-1178794	20.40078968	12.32318902	7.199256743	5.088534711	4.4065086	4.464691686	5.158974983	6.67967883	9.323012332	13.41923772	19.55071702	29.00505758	43.93892859	67.10503952	101.9291945	153.7725952	230.9636779	342.6690906	493.7439451	680.4669469	888.0423955	1090.339046	1262.468723	1395.420591
V2O5_mp-1178826	27.35628926	15.35417813	8.084373409	5.374939946	4.764898132	5.18857723	6.39976883	8.629170989	12.42399264	18.46595501	27.54070829	40.97115394	61.24858077	92.34882037	139.942431	212.0475184	319.3083939	472.8587458	679.8422976	938.5523401	1230.788732	1514.389012	1741.065607	1895.838542
SrO2_mp-1179089	23.01383667	13.4586116	7.844308358	5.595550321	5.315779667	6.237345809	8.078755449	10.89487495	15.12631273	21.56819267	31.43018455	46.76906268	70.99291901	108.8705224	166.346788	251.6695708	377.5195904	559.6029124	808.4414934	1119.698529	1470.197314	1816.615758	2101.756713	2286.088455
SrO10_mp-1179236	21.99839946	12.85831757	7.278473981	5.035497722	4.318342874	4.364381214	5.041832985	6.529939579	9.125192215	13.16032258	19.19787057	28.46693585	43.04856497	65.65376988	99.72046251	150.5878506	226.410507	336.0531183	484.0993062	666.667911	868.8631979	1064.755824	1230.640262	1360.202775
ReO5_mp-1179307	22.22876601	13.00422533	7.254812815	4.942244738	4.202805622	4.248914853	4.952531286	6.523840328	9.31011288	13.65653791	20.02361892	29.45420717	43.90136746	66.18772377	100.1940913	151.7833783	229.2255147	340.8899807	490.7810926	675.2778586	880.3167926	1079.501632	1246.889523	1375.284836
Mo2O7_mp-1180296	17.80842813	10.9774026	6.513809425	4.65904347	4.087084722	4.221696437	5.010526985	6.679736982	9.545156294	13.90222534	20.24152039	29.76629556	44.61383606	67.64204061	102.5807114	155.2651764	234.5017703	349.690944	505.4542713	697.474644	910.2565277	1116.568643	1289.581201	1417.854246
NO6_mp-1180313	24.91589581	14.15007636	7.661795693	5.072151753	4.209533301	4.176584062	4.793614751	6.220483249	8.748648112	12.69712601	18.56505532	27.45478014	41.29884353	62.71737112	95.14819963	143.8827488	216.7820483	322.1945106	464.2461814	638.9451013	831.7453388	1017.612589	1174.269902	1297.463915
I3O8_mp-1181126	15.85476365	9.780009733	5.862696907	4.265226215	3.820249103	4.034484592	4.891767379	6.639043624	9.600940687	14.05523987	20.45534047	29.98289071	44.79679354	67.84893857	103.0697478	156.5902465	237.5171158	355.3414309	514.2452433	708.7962766	921.9034574	1124.718786	1289.587148	1405.626679
CrO2_mp-1181747	21.87104183	13.22387543	7.474686454	5.23962116	4.728649509	5.112408531	6.252206521	8.456581794	12.31480966	18.49722869	27.73163272	41.29476417	61.67553046	92.87557669	140.6599311	213.2589586	321.4709403	476.1885057	684.0332877	943.1308178	1235.350383	1518.210775	1743.94039	1898.248295
BaO6_mp-1182169	19.53879894	11.66306623	6.807677793	4.84870335	4.247844646	4.352765861	5.072593879	6.600851862	9.231571916	13.28749252	19.33788234	28.64797626	43.34031007	66.13121292	100.4199594	151.5380055	227.7560395	338.172572	487.631033	672.515808	878.2642245	1079.058043	1250.305035	1383.289682
Tm2Te3_mp-1188133	11.7709185	7.579624493	5.217300075	4.68407213	5.178207447	6.243909288	7.820562827	10.32268767	14.50328845	21.23910446	31.54716925	47.05934512	70.64594478	106.782916	162.0073292	245.7946602	370.4406518	548.138501	787.00534	1087.604271	1432.480523	1772.407479	2048.33611	2242.436409
CaAs_mp-1188146	11.95997606	7.418076659	5.140723285	4.766818684	5.515017096	6.98330506	9.082243032	12.12052358	16.74316868	23.88598268	35.12778891	53.32311346	82.77516884	128.5901031	196.5715903	295.6079241	440.2931682	648.5287631	933.7904554	1296.015132	1710.11872	2118.982546	2462.701162	2721.991998
ReP3_mp-1188155	14.89428915	9.466540337	5.988588794	4.694872912	4.529644723	5.023380451	6.189910895	8.370542739	12.05506764	17.73318147	26.0740997	38.52391922	57.69961121	87.30502411	132.3524619	200.3851148	302.1208069	448.6871949	646.249918	891.838096	1168.253193	1438.875701	1663.47658	1825.369913
Bi2O3_mp-1188316	28.71564208	15.84667849	8.474168164	5.734089052	5.032825382	5.220487653	5.979986276	7.495711361	10.25373236	14.85409844	21.91836655	32.3333224	47.78576282	71.19469803	106.9824112	161.3558135	241.9807659	356.1155002	508.177221	698.0015668	915.8547956	1134.773579	1321.020839	1464.868468
Ti2O3_mp-1188323	14.73152353	10.26882367	6.706568984	5.134649732	4.707337267	4.990030109	6.018164247	8.137957556	11.82398767	17.5286618	25.88912102	38.37227421	57.63179376	87.29775899	132.1370748	199.4497332	299.9715113	444.9710644	640.0421145	880.1248248	1145.243241	1397.485311	1596.830255	1724.690558
Dy2Te3_mp-1188427	12.28747813	7.768843409	5.276080796	4.715094851	5.228544874	6.312828539	7.848540073	10.22262351	14.20738468	20.73347578	30.85910415	46.16218355	69.36624228	104.8063732	158.9095108	240.9203514	362.6486582	535.780467	768.4742649	1062.202151	1401.055743	1737.382186	2013.065113	2212.018734
Y2S3_mp-1188645	12.8956143	8.037627111	5.337387078	4.689003319	5.227382047	6.531469261	8.542389327	11.62322678	16.49697368	24.10861449	35.80037096	53.92804074	82.3575215	126.4288749	193.1672346	292.7970295	439.8711849	650.4146825	935.349103	1292.9846	1697.025956	2087.070025	2398.920563	2616.327492
NaAs_mp-1188662	12.54445604	7.332150448	4.761956322	4.279355837	5.051491939	6.685411471	8.991242231	12.17553274	16.97464001	24.55253499	36.61080221	55.87886352	86.52192537	134.0261605	205.25725	310.01703	462.7766973	680.8677754	978.5788583	1358.837618	1798.92675	2238.252221	2608.289556	2891.639626
P2S3_mp-1189177	20.71134009	11.35206373	6.445295883	4.871339409	5.109101814	6.584904211	9.158810285	12.96365216	18.52111345	26.72378809	38.930143	57.53463128	86.62648704	132.160664	202.045489	307.4514101	464.5284514	691.9858164	1001.920587	1388.496161	1818.709401	2228.193685	2543.916223	2735.876681
Tm2Se3_mp-1189318	15.1476782	9.131283822	5.773582875	4.797436123	5.096334515	6.080732337	7.565434343	9.856441145	13.68567684	19.9801611	29.74920585	44.39034161	66.36409899	99.79864883	150.9559841	228.7307602	344.2750232	508.4998041	728.8065872	1006.137318	1325.810532	1644.375279	1906.696172	2095.330655
Sb2S3_mp-1189633	17.13906564	9.640361002	5.745724723	4.636022226	4.96661594	6.165063053	8.073715991	10.95793166	15.50020807	22.61946111	33.46094809	49.86108569	75.0042632	113.8137041	173.3376987	263.6597182	398.1715364	590.7722229	850.3505722	1174.629401	1539.653729	1890.438333	2167.381105	2358.646466
MnO2_mp-1189857	24.80273684	13.98629431	7.517583258	5.152869935	4.728772941	5.310896089	6.69205024	9.117955907	13.16022965	19.53689402	29.08646908	43.22502753	64.60627913	97.45432183	147.7843869	224.0953482	337.7008469	500.5267185	720.3614278	995.6144282	1307.135194	1610.064454	1852.237052	2016.333018
ZnSe_mp-1190	15.611212	9.682833204	6.017777291	4.805436718	4.989384841	6.026011394	7.783871417	10.56839779	15.10170737	22.31172899	33.23122945	49.43112815	73.82938893	111.2750256	168.913323	256.7441891	387.498143	574.0154152	824.8990693	1140.191044	1501.516154	1858.247198	2144.443131	2332.066087
TcCl3_mp-1190915	17.33537491	10.32642608	6.349998263	5.097012881	5.225213457	6.13475256	7.737249147	10.36937723	14.66424019	21.40626104	31.67861185	47.44464072	72.06887792	110.3902861	168.9642073	257.2618163	388.3070809	575.6411536	827.0608734	1138.205304	1483.368656	1809.417345	2063.700612	2237.487925
LuH3_mp-1191245	32.02774642	17.26240945	8.692605297	5.252867551	3.947989466	3.587038676	3.865659485	4.839267613	6.68901478	9.612551555	13.91541203	20.31562406	30.09123225	44.95145985	67.13622535	100.15717	149.275039	220.1975438	316.5431475	438.4522966	581.6164273	735.4589965	887.8543266	1033.130903
Sb2Te3_mp-1201	12.00659876	7.430994544	4.94204044	4.278518212	4.591293287	5.507298678	7.051126273	9.59513653	13.70794726	20.01741923	29.42207212	43.69612809	65.87275359	100.1534461	152.2106916	230.6667778	347.9213782	517.116342	746.0490298	1031.760217	1352.970215	1663.216304	1912.489156	2084.117278
WO3_mp-1202223	31.28094378	16.79029736	8.536281855	5.500084554	4.709985095	4.930362651	5.84600551	7.636751024	10.77994236	15.85516423	23.46009393	34.53519657	50.94698907	75.866853	114.0100155	172.0455503	258.4820693	381.6981797	546.7404419	752.5583004	986.7014661	1218.636302	1412.282046	1557.455378
WO3_mp-1203069	32.82130587	17.75336333	8.988474081	5.705305509	4.809447904	4.978385846	5.858986365	7.611263031	10.70148382	15.70615658	23.22060974	34.16898744	50.38442247	74.99134441	112.626244	169.8204549	254.9103025	376.1486169	538.538334	741.1009035	971.8407386	1201.028578	1392.375443	1533.834692
CaH2_mp-1205322	30.55024866	14.24375952	6.928112706	4.592056308	4.127073294	4.481021595	5.396302737	7.00444222	9.666710759	13.88967704	20.42594238	30.57677184	46.36165466	70.35622674	105.7738942	157.5368198	233.3159011	342.316988	491.7797508	683.1695278	907.5935273	1143.19889	1369.329573	1588.263065
YO3_mp-1206099	18.06944579	10.98662622	6.592009948	4.899240839	4.516970892	4.84247764	5.820036704	7.715057594	10.93271259	15.9161611	23.35172799	34.68848966	52.40779632	79.82745883	121.2403239	183.2152184	275.5572032	408.8927805	589.1337679	812.6266209	1061.871041	1303.487409	1504.56699	1654.725341
Cu2S_mp-12087	9.574690444	7.770979797	5.957130637	5.273437884	5.434741108	6.284839376	8.071967084	11.40655013	17.04450203	25.63782511	38.06236502	56.49560501	85.08786105	129.7744859	198.5337173	303.244691	460.6453141	687.6026774	991.8434181	1364.930537	1774.419739	2154.841309	2430.319373	2557.947749
CdP2_mp-12112	16.71453235	9.832754304	5.888473428	4.628498406	4.821096141	5.905175366	7.741697418	10.59865638	15.1511503	22.30733146	33.16163463	49.4411094	74.21322598	112.3192355	170.6848981	259.0764506	390.3937072	578.247305	832.021871	1151.401499	1516.405466	1875.762849	2166.384088	2364.762334
KSi_mp-1217	9.357391281	5.574937527	3.849404295	3.789281822	4.966847506	7.226478782	10.3814237	14.51313422	20.37665125	29.41017009	43.90081069	67.583105	106.0517762	166.3671497	256.8288671	389.1205323	581.3961026	856.797762	1235.516495	1722.300711	2286.782657	2848.573694	3316.689231	3665.098587
NaS2_mp-12180	14.94947529	8.547086671	5.170044105	4.213340227	4.705681803	6.284609647	8.837350746	12.48571026	17.79258918	25.77589217	38.00765232	57.14069969	87.48923769	135.0948084	207.7117068	316.1715181	476.3686772	707.3674081	1023.210185	1422.030675	1874.510097	2315.939112	2669.703813	2903.276269
CrSi2_mp-1222	11.6155389	7.836018241	5.334174305	4.556432756	4.809479905	5.760574255	7.47827845	10.39456613	15.16132619	22.49184713	33.38129862	49.82325279	75.29102279	114.6025142	174.136744	263.4563874	396.5026329	588.6610566	850.082418	1178.998144	1552.342525	1917.229773	2213.947568	2416.726512
Sb3Ir_mp-1239	13.19046262	8.25008183	5.431004409	4.635802832	4.902102322	5.747723489	7.132620282	9.447762707	13.362762	19.61979828	29.04325011	43.00862217	64.04320207	96.15350827	145.2313299	219.8377654	331.0230253	489.5170658	702.0394164	968.5864354	1274.194553	1577.547168	1829.31625	2014.589378
Sb2Ir_mp-1247	13.06354421	8.360742298	5.525927129	4.655863846	4.818073767	5.548359191	6.839474342	9.09517784	12.96484783	19.13188514	28.31600648	41.7694757	61.91175293	92.66333813	139.8331826	211.8302546	319.3628689	472.574648	677.5692882	934.3126576	1229.114438	1523.026088	1767.919134	1946.56463
Dy2S3_mp-1270	13.30734753	8.732779274	5.84103928	4.966999604	5.230344873	6.170796658	7.772330758	10.45532833	14.93890815	22.05024322	32.80494335	48.99848762	73.84731125	112.2180352	170.9587214	259.9114222	392.0921878	580.5670592	833.329513	1148.636885	1505.024796	1849.968134	2123.542388	2306.515238
KS_mp-1287	9.647677473	5.752930061	3.88711361	3.696485699	4.75139441	6.940438325	10.13940106	14.4130667	20.44781345	29.60384104	44.02982795	67.24325239	104.6959889	163.6872096	253.2708847	386.0340694	580.6965329	860.2999793	1243.599968	1732.240243	2292.751796	2842.814442	3286.606416	3590.506434
AgO_mp-1288	12.10110158	8.869870512	6.151614054	5.029409582	4.907699597	5.476051329	6.865781616	9.558715206	14.19262784	21.32312036	31.6042846	46.63476264	69.60236178	105.2867597	160.3509043	244.6534108	371.6397952	554.4508384	799.0639821	1099.537637	1431.895116	1746.500855	1986.508174	2123.271872
CoSb3_mp-1317	12.11039025	7.828598448	5.3322387	4.715084017	5.17623508	6.28921911	8.022550242	10.79375582	15.34943701	22.56346407	33.50266756	49.98743417	75.21300105	113.9973503	173.1609308	262.5723947	395.3143904	584.6075124	838.9294428	1157.537777	1520.046909	1874.150099	2159.399837	2357.156765
BaO_mp-1342	17.614208	10.03147465	6.03800032	4.743005377	4.93636566	6.018148576	7.719590905	10.15058332	13.89769914	19.90431058	29.42934666	44.34587877	67.60144885	103.4368076	157.5442866	238.0067502	356.3679305	525.9113204	756.1217693	1046.547039	1380.389795	1717.123713	2003.068624	2210.800598
CaP_mp-1345	12.635302	7.727921374	5.184363659	4.697872522	5.440735851	7.000741954	9.253808036	12.4941941	17.44911067	25.20103663	37.44117023	57.08755677	88.6225514	137.7061757	211.1231955	318.7778912	475.920871	700.905086	1007.918827	1397.494296	1842.49968	2278.673882	2638.236199	2904.211039
B6O_mp-1346	26.71429827	15.0255579	7.748666577	4.909721572	4.233645896	4.65653247	5.902000966	8.113196069	11.72941905	17.37272472	25.86353366	38.61023296	58.09996485	88.0103945	133.2170253	200.6294567	300.3734237	444.5343372	642.0261308	892.2759279	1179.202513	1465.864466	1704.538088	1869.068195
IrSe2_mp-1361	13.08307748	8.476622034	5.488151124	4.386349046	4.28670365	4.810522248	6.028193422	8.326580746	12.22152946	18.16008204	26.68490114	39.11897759	58.06255178	87.39968605	132.6056502	201.8938356	306.5122812	457.478761	660.0557299	910.2449407	1190.091276	1461.231472	1679.681178	1824.756805
Cd3As2_mp-1372	10.58368099	7.552614867	5.457768127	4.827091654	5.110323606	6.052668275	7.809603594	10.88269479	15.91656338	23.52714255	34.6485993	51.43023941	77.73978365	118.9632173	182.2705362	278.4301881	422.8759958	631.6327136	913.1016933	1261.594757	1649.624883	2019.223415	2303.252576	2465.650351
DyN_mp-1410	13.93103999	9.696586313	6.486391935	5.189206102	4.970772205	5.402898913	6.538213371	8.780334914	12.70278318	18.86996653	27.96414639	41.42495125	61.98274249	93.68887067	142.1478655	215.5597251	324.9941893	481.379714	690.6443153	950.5263124	1244.565595	1533.255984	1768.550505	1926.180037
CoP2_mp-14285	13.72162973	9.28920736	6.135502824	5.007838803	5.053591787	5.836711427	7.391583067	10.15793767	14.83030816	22.16467036	33.09574945	49.42189253	74.44849742	113.0944375	172.157982	261.5203835	394.6625464	585.4551333	842.059156	1161.186119	1518.719308	1860.574054	2126.782931	2295.778985
Ba3P4_mp-14289	12.26730001	7.56676128	5.157522918	4.704584729	5.374605771	6.725854464	8.646036093	11.45798803	15.85375066	22.78917717	33.71226582	51.11574762	78.82530017	121.684534	185.6356017	279.548895	416.9695011	613.8622048	882.5090904	1224.219659	1617.574631	2008.600448	2337.994694	2588.595286
TiO2_mp-1439	30.19242428	17.95065522	9.692093964	6.174046502	5.206631135	5.539637634	6.770790661	8.984282781	12.60620174	18.28033584	26.88285239	39.92321534	60.07116764	91.29128415	138.7874192	209.7717386	314.7121415	465.9560708	671.8745993	930.1268252	1222.98117	1512.800527	1748.592578	1897.265789
ZnP4_mp-14587	15.15766363	8.985337796	5.42607859	4.316451696	4.51083672	5.532509713	7.347632807	10.30922542	15.08311143	22.45989102	33.40201346	49.64533702	74.40312533	112.6604936	171.5131768	261.1948169	395.4970248	588.9136731	850.8875664	1179.519573	1550.991122	1909.990272	2195.713808	2391.650462
Er2Te3_mp-14643	12.33120712	7.789325475	5.278744034	4.705833628	5.207586108	6.275496716	7.786205866	10.12489103	14.06375185	20.53058657	30.56339313	45.68725718	68.5515639	103.4287623	156.7038777	237.5483963	357.594226	528.2605016	757.5073955	1046.89606	1381.060271	1713.25305	1986.016639	2183.402387
Nd10Se19_mp-14650	11.3629626	7.594653945	5.285578514	4.67640531	5.063975598	6.097531156	7.830122909	10.70863328	15.41867284	22.7101632	33.59072232	50.02607757	75.48873889	114.9776544	175.3388923	266.6803912	402.9871032	598.6387128	861.9750394	1189.664496	1557.386167	1910.110458	2186.387235	2363.450554
Cs2P3_mp-14652	10.67448688	6.442341195	4.448681565	4.289107162	5.356093668	7.303652553	9.883919805	13.29628449	18.38181876	26.4774904	39.51016182	60.50291189	94.0010079	145.9723241	223.9288003	338.6238436	505.8315496	744.3389191	1069.765965	1485.590201	1966.473305	2443.410654	2837.997111	3130.935026
Tm2S3_mp-14787	19.62363295	11.73563323	7.197087777	5.454858461	5.364432363	6.261358949	7.880214729	10.36450743	14.31195681	20.63028283	30.44686387	45.41526918	68.30930493	103.3965675	156.635467	236.5181463	355.0142289	525.5336214	756.583537	1045.568056	1374.820169	1705.28505	1980.358124	2161.088446
BP_mp-1479	22.29337011	12.22276605	6.574803354	4.618293914	4.387781576	5.086293563	6.544241877	8.993562112	12.9820902	19.23422737	28.66902995	42.83863547	64.47747106	97.70559697	148.2111721	224.126785	336.7411111	498.6034038	718.6646908	996.4379007	1313.45325	1625.802769	1883.447371	2071.165529
Sn2S3_mp-1509	15.47606742	8.869981761	5.422685317	4.468380897	4.800160916	5.905521995	7.689493507	10.46404736	14.88203933	21.76873323	32.19097769	47.97749131	72.28249046	109.7974459	167.0986392	253.7501707	382.7713123	567.8121689	817.5779085	1129.876059	1481.725275	1821.288899	2094.692358	2292.941093
Pr2S3_mp-15179	12.81861968	8.278867173	5.559998417	4.851707387	5.322828989	6.533374302	8.433089074	11.43072501	16.30944543	24.03061643	35.80312707	53.6793647	81.24251266	123.8921634	189.1994355	287.9704821	434.5164459	643.4802318	924.2993196	1275.458726	1672.427852	2054.959025	2355.011758	2552.962293
Tb2Se3_mp-15257	12.58926475	8.226683676	5.57166634	4.832886195	5.170335212	6.138651523	7.720843441	10.34169968	14.72547654	21.69310471	32.21828001	47.98882385	72.05267941	109.1021823	165.8584671	252.0188578	380.259337	563.0989937	808.2216722	1114.507094	1462.258832	1801.085885	2072.271444	2256.880697
NaSe2_mp-15514	14.26922367	8.259296443	5.199257239	4.475762468	5.067351408	6.503511537	8.606026893	11.61448038	16.25183052	23.58451594	35.07847008	53.06661839	81.26533725	124.9174246	191.026379	289.5798372	434.5471579	641.623523	922.5939559	1278.028195	1684.478465	2083.21061	2408.782379	2646.032521
C11F7_mp-1588	39.23151066	20.89794242	10.29946878	6.307642916	5.311112612	5.736867753	7.143371761	9.625957287	13.62767777	19.80697485	29.07763709	43.05580239	64.5866754	97.8480685	148.3478216	223.8405296	335.584471	496.6604691	715.5846909	988.6457921	1293.860105	1587.801608	1819.964033	1967.999582
Al4C3_mp-1591	20.01241999	11.06863816	6.13591845	4.489251413	4.415416448	5.218869783	6.751246881	9.2512875	13.28559027	19.62714161	29.30114258	44.0227417	66.69312669	101.5260482	154.2056006	232.8807269	349.061812	515.8117459	742.873774	1030.619498	1360.820693	1688.6985	1963.512234	2170.700743
Nb2O5_mp-1595	28.71244146	16.01198958	8.461539327	5.568828885	4.950774047	5.502169403	6.910501643	9.318103547	13.20966327	19.26341423	28.32564813	41.81012865	62.28058501	93.70391766	141.5611174	213.5862277	320.5472004	474.4233747	682.9682892	943.7978166	1238.897521	1529.126741	1765.013215	1921.655016
Sn3N4_mp-16031	18.1468681	10.78881058	6.386202337	4.78302062	4.516369921	4.95659595	6.035449615	8.049749606	11.48994084	16.88872308	24.91922867	36.889061	55.16683169	83.22382207	125.8605533	190.1721249	285.9569455	423.3102928	608.1850716	838.7105326	1099.675164	1357.11158	1574.64872	1742.099366
MoSe2_mp-1634	16.41748888	9.453172584	5.703378837	4.586939145	4.844113538	5.895851849	7.574940938	10.15062742	14.30571457	20.9348509	31.06714334	46.24037499	69.16400189	104.2075218	157.8034825	239.1239208	360.0581964	532.6958574	765.0933659	1056.991908	1390.679278	1719.986451	1989.74257	2184.157668
Nd2Te3_mp-16380	9.79718904	6.698858972	4.840403213	4.424473595	4.890368927	5.976237739	7.796844125	10.82509123	15.71920668	23.16654695	34.18122849	50.89034463	76.98718125	117.5526261	179.3526967	272.6363918	412.2197364	613.8482008	886.8447055	1227.752091	1611.109715	1979.3035	2265.351359	2437.146115
Tl2O3_mp-1658	15.41153919	9.617105019	5.959797424	4.532977751	4.212382351	4.517018725	5.445665659	7.282811545	10.41999315	15.23522266	22.28623214	32.84321908	49.16952222	74.35926424	112.5084737	169.8827785	255.6039179	379.2384274	546.0513814	753.6640214	988.5684008	1221.987327	1421.34563	1570.486953
Ge3Os2_mp-16610	18.38415736	11.50354672	7.096612039	5.455096745	5.153541182	5.478416012	6.319116565	8.003075178	11.10299657	16.26336905	24.15762056	35.82174956	53.20632889	79.53452424	119.5752795	180.0112351	269.0001346	394.052412	560.011436	768.1926425	1010.364385	1258.334534	1475.255516	1648.604011
KC10_mp-16791	24.996552	14.19295846	7.851262677	5.471961166	4.86088649	5.091850774	5.975750211	7.734236384	10.81135925	15.77269739	23.43083286	35.25833227	53.67130105	81.89912354	124.0757564	186.3716116	277.9438119	409.0946252	586.7661468	809.8799393	1063.466354	1314.878802	1531.139158	1705.483849
Rb2S5_mp-16911	13.51756167	7.756546339	4.869262046	4.189124349	4.904286574	6.714928698	9.473233532	13.27499803	18.75140479	27.0565652	39.91374624	60.12035992	92.16103817	142.3647995	219.0112398	333.7363757	503.3290318	747.4851961	1080.445405	1500.067391	1975.298352	2436.916622	2803.791052	3044.635585
FeSi2_mp-1714	12.04607815	7.948452954	5.268448189	4.447908295	4.738971864	5.782940354	7.620780825	10.69077837	15.7250464	23.55189721	35.19644677	52.56623146	79.1333131	120.0921466	182.661417	277.3428025	418.5754863	621.7339485	897.0841869	1243.413247	1636.77397	2019.146997	2324.060419	2527.012475
K2Te_mp-1747	6.698588834	4.082454836	2.981899335	3.088079764	4.292500194	6.637656546	9.948273985	14.12355618	19.81530207	28.52472612	42.59083029	65.63753825	103.0786632	162.034963	251.2457099	382.9738198	576.0176178	854.1772615	1237.159807	1727.799644	2296.976747	2870.244957	3351.574323	3693.728429
BaC10_mp-18027	21.65911378	13.0219696	7.545880087	5.310581268	4.594318043	4.640452033	5.321386528	6.834120512	9.510482504	13.73957765	20.14852279	30.02384006	45.48495235	69.22548572	104.5854266	156.7776238	233.9120757	345.1232458	496.0463206	684.8912769	899.0428273	1113.115516	1301.231751	1453.849078
YbS_mp-1820	19.63870479	11.78188103	7.189135068	5.426021453	5.244996216	5.914328874	7.148129816	9.114501509	12.41048001	17.88917082	26.55034116	39.75872812	59.77413294	90.190067	136.2103052	205.2560127	307.3732977	453.3573879	650.3037597	897.7296822	1183.409473	1475.194148	1724.558078	1899.950295
TiO2_mp-1840	29.38561255	17.10406013	9.11440159	5.871458601	5.049211712	5.450870856	6.721151248	8.984340576	12.70535546	18.55172995	27.39189484	40.69987893	61.11550866	92.64506131	140.6918472	212.7857105	319.5425492	473.0863352	681.6228784	943.2296747	1240.083099	1532.554173	1768.89874	1920.173672
Te2Ru_mp-1848	11.95377391	7.948853338	5.403504791	4.590903077	4.746032418	5.516004267	6.978383276	9.564479972	13.88120489	20.52856337	30.28130861	44.77894021	67.0388775	101.4544767	154.1058854	234.0535066	353.7970941	525.9364793	757.3737875	1045.033699	1368.886269	1683.164964	1934.700726	2099.698964
Mn3O4_mp-18759	18.43685977	11.62568398	6.930760064	5.109878464	4.780158055	5.275689692	6.525990356	8.887405822	12.9866523	19.51597733	29.2369575	43.53324297	65.09619384	98.20273577	148.9872158	226.245637	341.5634417	506.5834404	728.2470654	1004.314596	1315.086484	1614.703559	1851.662259	2009.607537
WO3_mp-18773	31.25741517	16.95589785	8.672218189	5.593459934	4.751323	4.904079179	5.741475365	7.449943412	10.50267515	15.46771758	22.93099196	33.82060839	49.97692609	74.51703587	112.071045	169.1776743	254.1165342	374.9225971	536.3574846	737.4010928	965.9639339	1192.217375	1381.475863	1524.971196
MoO3_mp-18856	30.33096098	16.71458571	8.665225958	5.668376435	4.959803178	5.341706549	6.504533262	8.639581288	12.27094372	18.07623965	26.8426831	39.85306546	59.485672	89.53749855	135.4190311	204.7424917	307.5757322	454.4164018	651.9192242	898.4269813	1177.239075	1449.556818	1669.823362	1822.829385
SiRu_mp-189	12.93904509	9.018247767	6.15055339	5.095567064	5.101894358	5.789078245	7.237556144	9.899161882	14.41544259	21.42800817	31.75532478	47.11506311	70.66470321	106.9530749	162.1552691	245.3982472	369.3781321	547.1439351	786.2385509	1084.184236	1421.283694	1751.53553	2020.267752	2200.118467
Mn5O8_mp-18922	17.41634132	11.3066783	6.887410022	5.109112128	4.736160514	5.160786508	6.348527127	8.669856648	12.73006858	19.15997869	28.65190259	42.56064178	63.5572707	95.82414214	145.3239924	220.7180452	333.5729603	495.4415433	712.6815789	981.9073638	1282.634861	1570.010123	1795.016578	1941.549948
Fe3O4_mp-19306	13.01327987	9.536760452	6.494051299	5.095308922	4.720999699	5.040935068	6.146996004	8.422983778	12.35478924	18.3609741	27.05030174	39.96712997	59.96828659	90.97100971	138.1287695	209.3577976	316.2909381	470.924305	678.490565	932.0736397	1208.923492	1467.930949	1665.494717	1778.908369
MnO2_mp-19395	22.79649608	13.5417691	7.527799476	5.225444417	4.726108386	5.157816728	6.358828875	8.624413772	12.54786595	18.81831257	28.18227358	41.92529796	62.56596437	94.20721084	142.7914628	216.7495775	327.0739839	484.8819627	697.0369762	961.7376866	1260.416877	1549.205261	1778.09732	1931.846085
GaSe_mp-1943	16.11550776	8.82894001	5.249711659	4.297713951	4.691981904	5.905154346	7.778743721	10.55597833	14.89570487	21.7010752	32.10450905	47.88137852	72.02267	109.0640886	165.4677304	250.5833509	377.0431894	558.2635603	803.4248607	1111.831294	1463.000254	1807.509239	2091.243541	2304.281071
WO3_mp-19443	28.71699399	15.65374371	8.115064989	5.329900831	4.59072535	4.779626134	5.638546832	7.377079673	10.47114058	15.47077912	22.93585478	33.78914122	49.88899287	74.37344158	111.9095041	169.1313166	254.4621522	376.0267562	538.5402053	740.8130905	970.4349502	1197.31118	1387.439967	1533.354223
EuTe_mp-19736	9.474108709	6.519273088	4.758206663	4.398823451	4.913263208	6.05631636	7.954662714	11.09858005	16.16742625	23.86490805	35.22411268	52.41962802	79.23122782	120.8552317	184.2160847	279.8265959	422.9153746	629.7397755	910.1570734	1261.199247	1657.39405	2039.576068	2337.541209	2515.994391
TmN_mp-1975	14.18555886	9.875169835	6.573398696	5.239231267	5.013124682	5.443282821	6.57201942	8.811692345	12.7656495	19.03065807	28.26946302	41.83010425	62.35641213	93.92821039	142.3166788	215.851904	325.4218532	481.4489519	689.539579	947.8662903	1240.833799	1529.164534	1764.336187	1922.948626
Ba2Sn_mp-1981	9.084042631	6.083071714	4.648408656	4.693647495	5.727385287	7.437845776	9.79169962	13.18164567	18.33531527	26.26765564	38.70644851	58.78879491	91.13214383	140.9455072	213.9527336	319.3702357	473.0437623	694.9776187	1001.536018	1396.371249	1856.667435	2319.632728	2708.104195	2980.869963
In4Se3_mp-19932	12.81329282	7.788716714	5.131927103	4.44620907	4.809545548	5.815430422	7.4580572	10.09131963	14.28908868	20.72784918	30.42252869	45.31652184	68.60057168	104.5143576	158.582491	239.2469331	359.024121	531.7160029	766.2682062	1060.948538	1395.469476	1724.287615	1998.351758	2201.208453
LaP7_mp-200	14.72097523	8.369495203	5.042471935	4.103896206	4.404662722	5.491470966	7.310333869	10.16782507	14.67460096	21.59580053	31.94916491	47.55981436	71.60656561	108.7662966	165.5257011	251.3946004	379.6547211	564.7568045	816.5129603	1133.539501	1493.201412	1843.844247	2131.127502	2343.714529
CeO2_mp-20194	26.55830311	15.90340935	8.797747877	5.920603278	5.171722208	5.456963208	6.457847763	8.355767714	11.67514374	17.10232488	25.40432395	37.74836929	56.31213725	84.68811077	128.071591	193.6566133	290.6935305	428.670066	613.8854542	846.215852	1113.027446	1379.886606	1599.967492	1750.170061
PdS_mp-20250	6.251901876	4.571040922	3.449638235	3.257743612	3.771046134	4.962573165	7.117336026	10.826837	16.76715703	25.42315774	37.52660295	55.25048376	82.86978608	126.6385191	195.2741061	302.0585634	465.7293579	704.2963192	1021.76634	1396.911957	1777.700245	2086.024584	2257.77097	2284.493817
Zn3P2_mp-2071	12.67273135	8.851392699	6.064924496	5.141804513	5.363225527	6.333415789	8.104955148	11.16999845	16.31851633	24.41923229	36.51944421	54.59216239	82.32776528	125.3829962	191.7014472	292.6267979	443.1356085	658.2332909	946.7989054	1305.936822	1709.700593	2096.251547	2393.886008	2574.666447
KTe_mp-2072	8.888663353	5.804812632	4.39059117	4.568370564	5.939293534	8.173298383	11.0162495	14.7382284	20.27697303	29.08942101	43.37792946	66.73157148	104.4641846	163.1468438	250.5561411	378.0138415	563.0248285	827.1196543	1188.55107	1651.636935	2187.138597	2715.255818	3145.503218	3451.469325
Sb2Ru_mp-20928	11.55630612	7.726816306	5.325781863	4.600822441	4.834879533	5.704237588	7.30696925	10.09482207	14.68949326	21.70274037	31.96848245	47.28438837	70.88978233	107.3650219	162.924173	246.9120144	372.5177478	553.3375519	797.0310822	1100.501375	1442.737804	1775.968695	2044.230865	2220.268664
Rb2Te3_mp-2095	9.319548453	6.003227851	4.440260453	4.500574734	5.697551002	7.654808389	10.13770373	13.4591901	18.54567256	26.73002946	39.86645864	60.86044126	94.10225002	145.4140937	222.3184735	335.7736308	501.5918149	738.011832	1059.89116	1470.71358	1945.476364	2413.709181	2794.034073	3064.690619
FeGe_mp-21255	9.818004075	7.390877649	5.489141474	4.899820496	5.196700764	6.162608592	7.979325866	11.19109186	16.50960911	24.61466772	36.46058286	54.19009895	81.66930842	124.2517089	188.9920321	286.462037	431.8785945	641.2328991	923.4186326	1273.77237	1665.692378	2041.126938	2331.698619	2499.654189
RbPb_mp-21525	7.596201144	5.184010885	4.164614915	4.556446117	6.047354851	8.275260812	10.98843727	14.54603011	19.94988363	28.63478113	42.6774345	65.38253494	101.5355247	156.9457016	238.6040624	357.1183286	529.0562813	774.8400119	1112.861683	1551.134151	2068.190183	2591.544076	3029.868752	3346.868124
KPb_mp-21526	7.981529838	5.43667344	4.324117082	4.660849506	6.105252281	8.302932569	11.02715653	14.62419422	20.04685127	28.69503365	42.69268712	65.52510818	102.2428436	158.8010427	242.0340268	362.3211904	536.4485045	785.567249	1128.549633	1572.714433	2095.08606	2622.795353	3065.899862	3387.495329
ZnTe_mp-2176	13.24066065	8.428219448	5.565566242	4.788588983	5.215640384	6.361681129	8.123044546	10.87677989	15.41560791	22.71688424	33.88556174	50.62067234	75.99192212	114.9951279	175.0009205	266.4120047	402.3598347	595.765489	855.2927209	1181.431762	1555.020992	1922.051411	2216.123507	2415.611505
PbSe_mp-22009	14.8937117	8.168577496	5.09749561	4.430653624	5.007810442	6.242265278	7.860019756	10.11030091	13.75241139	19.80188988	29.42669331	44.18335573	66.53283001	100.371119	151.6147417	228.9940568	344.0059718	508.5028992	730.8979025	1012.069053	1335.561327	1656.348477	1922.51563	2126.167269
FeF3_mp-22398	35.66354834	20.85015897	10.97194157	6.855611776	5.713300271	6.048283019	7.405653089	9.893524767	13.98256164	20.33297117	29.78969998	43.85509248	65.33744544	98.58499144	149.5081605	226.3328954	340.6127887	505.4020207	728.9074867	1007.324691	1319.295392	1620.773575	1854.859198	1988.709041
WS2_mp-224	20.46123937	11.46628951	6.528921533	4.869220337	4.79317901	5.546757135	6.921934447	9.155017565	12.84960462	18.77792694	27.78621464	41.12476145	61.08491227	91.48187638	138.0067176	208.755234	314.1214362	464.509566	666.5759081	919.7529552	1209.109497	1496.089472	1733.660842	1907.203065
AgN3_mp-2247	26.72879687	15.23424389	8.126247123	5.416720041	4.804018616	5.232170301	6.429721191	8.598874469	12.27511189	18.15211174	27.02577664	40.17297344	59.9660775	90.2093301	136.3174135	205.8821468	308.9672262	456.2216334	654.7997047	904.0649358	1188.76362	1470.767596	1702.18473	1862.956547
Li3N_mp-2251	16.71896117	9.590895271	5.772342658	4.644073733	4.887820896	5.916871881	7.56116871	10.04543435	13.97555015	20.28542062	30.4177349	46.78229209	73.00169421	113.5357072	173.529276	260.4529172	386.2782062	566.3532215	814.1665353	1133.794284	1508.184733	1890.018847	2225.829266	2500.467866
FeS2_mp-226	13.33488309	9.382434978	6.398629669	5.319069073	5.389655194	6.200776318	7.814213103	10.70636679	15.60635974	23.30683072	34.82434921	52.14542634	78.87434672	120.27605	183.516253	278.9927168	420.9344216	623.7885505	895.2588596	1229.879546	1599.481058	1944.902264	2202.816425	2351.484573
FeS_mp-22652	8.88219591	6.877961158	5.168606721	4.602101382	4.856821325	5.785834819	7.618097126	10.919161	16.3798936	24.585762	36.37115653	53.84191145	80.92844923	123.120152	187.7304746	285.8838749	433.7677202	648.2664347	937.5271094	1293.060121	1682.335855	2042.800266	2305.796996	2435.699475
InSe_mp-22691	14.34924469	8.205989342	5.167301918	4.448505363	4.953756674	6.177919851	7.976775379	10.65042395	14.89901177	21.63640757	32.02026659	47.88934297	72.27961646	109.6669073	166.3611002	251.5812605	377.8482534	558.3610603	802.1693095	1108.970441	1458.847006	1802.442096	2086.409163	2302.121974
Ca2Sn_mp-22735	9.83120646	6.574964517	4.950122865	4.88877275	5.854334411	7.522694981	9.846470651	13.16203678	18.11306047	25.66806587	37.6213508	57.31093253	89.6267014	139.8900799	213.4900999	319.0921917	472.4642595	694.0934393	1000.211306	1392.319638	1844.932948	2297.251378	2680.317589	2958.731044
BiI3_mp-22849	23.60756468	13.13940836	8.16826931	6.581336719	6.809581629	7.987003719	9.685603863	12.11608623	16.16013881	23.09022614	34.39303625	51.96343715	78.74479374	119.4839452	181.444834	275.4871328	416.5118658	620.0766002	894.4615479	1233.425392	1610.916297	1974.071151	2254.85055	2419.694662
Pr2I5_mp-22854	10.74541437	7.046799783	4.977935329	4.545276964	5.07756672	6.250216888	8.118490827	11.12462044	15.9440394	23.33806832	34.42137614	51.38957276	77.98486374	119.3881824	182.5387816	277.8465411	420.1333906	624.8796705	900.726622	1242.681832	1622.491841	1980.222576	2251.772396	2415.345332
HgI_mp-22859	17.70892801	10.47126357	6.555537701	5.284203465	5.362374412	6.055143785	7.103795731	8.804313595	11.88196399	17.24151838	25.77579569	38.47230635	57.04419486	84.73746657	126.9088246	191.3339949	287.5983217	424.7316877	608.4947317	839.7938405	1108.534868	1381.51981	1610.848706	1775.544206
VCl2_mp-22877	18.41335667	10.66942988	6.336301668	4.986080885	5.18405349	6.301214203	8.188382746	11.12947694	15.80834977	23.15653285	34.40875099	51.63438907	78.38007218	119.9328774	183.5709249	279.5650213	421.7846806	625.0340715	899.0631077	1241.418615	1625.954377	1993.444942	2279.870734	2470.334317
PbI2_mp-22893	20.00524003	11.24537567	7.083094649	5.848146851	6.183246212	7.318526535	8.865020832	11.04762452	14.71585264	21.06472308	31.46800836	47.633314	72.17830572	109.3679451	165.8252776	251.446842	379.5865561	564.0373082	812.7546669	1122.24908	1471.513725	1813.083362	2084.675986	2257.624902
HgCl_mp-22897	25.14411717	14.77468482	8.928159135	6.523181963	6.061533631	6.644283098	7.924424676	10.07928164	13.76744867	19.93047558	29.62340332	44.21291403	65.99702641	98.74995579	148.0499889	222.0145112	331.8953657	489.8382297	702.9336166	968.1787967	1270.026752	1574.180664	1827.960168	1992.156915
AgI_mp-22919	11.26795946	7.468451381	5.195830037	4.703075053	5.311809454	6.597911404	8.473733316	11.36141644	16.1266036	23.81122244	35.54084268	53.00084997	79.30166203	119.6581971	181.9270833	277.2036526	419.2090347	621.0008833	891.0928657	1230.048449	1618.211377	1998.372868	2299.063697	2496.532916
AgCl_mp-22922	13.61255572	8.860060623	5.794671811	4.857497515	5.185178397	6.307876531	8.154495605	11.11729383	15.99790058	23.77658651	35.5498128	53.06118468	79.5719727	120.4414108	183.5317249	279.8378608	423.1991311	627.2294033	900.8070407	1243.596877	1634.163938	2014.417757	2312.517269	2502.328302
PtBr3_mp-23165	16.49558752	9.6707048	5.910941317	4.76319662	4.91918833	5.775722788	7.216646947	9.579537262	13.53498597	19.86222479	29.39427017	43.4496613	64.53355333	96.84031475	146.7057463	223.2231031	337.8416834	501.3956132	720.0875623	992.1726876	1299.481712	1597.289784	1835.595737	2004.604394
Pr2Br5_mp-23169	12.58744801	8.114885454	5.526060915	4.845476496	5.236990249	6.294097418	8.03031262	10.85921423	15.4425983	22.54639172	33.2707739	49.72865267	75.52939096	115.7272713	177.0996431	269.6563465	407.4335952	604.940243	870.1150197	1197.871317	1561.025624	1903.096279	2165.634607	2332.183566
ReCl3_mp-23174	19.96544733	11.39653337	6.696679277	5.181907142	5.193482144	6.00073403	7.440932744	9.8138204	13.75768437	20.0689794	29.72552325	44.33930535	66.74334173	101.302496	154.2468455	234.4742866	353.6334618	523.3786448	750.6261742	1032.839552	1349.261843	1652.882601	1894.245074	2065.616964
HgBr_mp-23177	22.85720427	13.30951219	8.060729531	6.068113268	5.797184338	6.38388256	7.508933353	9.39872299	12.74457777	18.47678926	27.56896085	41.16620208	61.20466356	91.11555346	136.314521	204.7318583	306.7723847	452.9318655	649.3444942	894.5592659	1175.744559	1459.865232	1697.192504	1856.98156
SnI4_mp-23182	17.51212464	9.705162567	6.065778236	5.17821942	5.839799138	7.453237871	9.678705728	12.68892506	17.32840086	24.85248554	36.75528153	55.06476226	83.04982026	125.9323386	191.5744208	291.5239983	441.2678609	656.8484807	947.729522	1309.404775	1713.791974	2099.479759	2394.530799	2576.532326
BI3_mp-23189	15.01653184	8.730498169	5.44740228	4.407399404	4.436669749	5.064725713	6.269541146	8.318601248	11.60681296	16.60630652	24.16084751	36.00766983	54.93954256	84.45724396	128.8788621	194.9768023	293.3622921	435.9593744	629.7185918	870.9014688	1140.293942	1401.28143	1617.824211	1778.052966
P2Os_mp-2319	18.71330833	11.34863458	6.739049457	5.041791555	4.760178158	5.191424119	6.221420665	8.159565174	11.57549708	17.10782259	25.42178114	37.60970091	55.79934823	83.51071075	125.9437867	190.4701015	286.3557123	422.4389585	604.1787317	831.5887247	1092.713751	1354.201697	1575.599221	1744.490047
TlI_mp-23197	17.99165686	10.22278561	6.50168627	5.408172209	5.683231314	6.578023805	7.733859833	9.399650392	12.35927806	17.66892566	26.52960203	40.37901712	61.33563144	92.85180125	140.3623313	211.9937213	318.5534797	471.1176841	676.6940487	934.6844225	1231.399874	1530.418179	1781.034534	1959.789248
InI_mp-23202	14.10534876	7.952962689	5.033567874	4.380487941	5.018965594	6.462237276	8.450855673	11.18458701	15.43520924	22.30807369	33.09171618	49.53128947	74.469127	112.4741441	170.4403947	258.4346716	389.7579282	578.1499594	832.6552554	1152.319543	1516.598762	1874.038186	2162.667797	2364.589292
ClO2_mp-23207	28.07236061	15.25357219	8.052374765	5.474384291	4.911387429	5.3174484	6.470080832	8.608633689	12.24584967	18.00819744	26.69741456	39.77040624	59.8589401	90.93179469	138.5121524	210.5415969	317.7716811	471.2594866	677.1589272	931.3575561	1212.464548	1477.856587	1686.428265	1833.785288
FeCl2_mp-23229	15.65526803	9.798366002	6.255514469	5.145826892	5.355979932	6.35486197	8.088001571	10.93081484	15.56886152	22.8503871	33.95225974	51.02017499	77.738657	119.3920478	183.0831279	279.0150662	421.248275	624.54456	897.6801644	1236.3553	1612.635227	1967.37452	2240.073387	2417.090958
AgBr_mp-23231	11.99696016	8.057027223	5.547630497	4.892249479	5.364910957	6.552061605	8.435355377	11.47665867	16.51519986	24.52009897	36.58062198	54.51799686	81.74581277	123.781554	188.7049338	287.9540768	435.96638	646.5919971	928.1731904	1279.219222	1676.422508	2059.367278	2356.402701	2543.992361
Ta3I7_mp-23238	13.88981285	8.114529423	5.192036664	4.488684256	4.938027029	6.004331087	7.541419638	9.886012428	13.75936577	20.02992316	29.64873923	44.01379766	65.60485261	98.50481401	148.9314659	225.934109	341.0478527	505.4484632	726.1883017	1002.836931	1318.052987	1626.263359	1876.050173	2058.997234
CoCl2_mp-23240	12.74886468	8.676176347	5.905579729	4.917281493	4.948308924	5.63745319	7.051295448	9.567378591	13.69397577	19.97673364	29.33957487	43.8021467	66.79994511	102.855027	157.68055	239.9430281	362.6684257	539.9024061	778.7638029	1072.366135	1394.002726	1694.760635	1925.645774	2067.091137
BCl_mp-23256	23.51583944	12.52584768	6.881012849	5.045867743	4.899199652	5.608749254	6.979227248	9.233259086	12.89147389	18.66832588	27.60633932	41.53442851	63.43557043	97.39330606	148.7017987	225.0427425	337.5272692	498.6364125	716.8357199	990.3050121	1298.749782	1599.019634	1849.188371	2045.135609
LaBr3_mp-23263	20.9770727	12.14136357	7.623471182	6.015814104	6.188814859	7.514898842	9.68355908	12.78952815	17.50646115	24.96161869	36.6494705	54.8092025	83.09796365	126.9710875	193.8962657	294.6255753	444.8795859	662.6900684	958.4295094	1324.433649	1731.669047	2127.55141	2442.155777	2628.774849
InCl_mp-23276	17.73950184	9.906530661	5.954345796	4.782644057	5.174660181	6.595698524	8.815013651	11.95601547	16.65948846	23.96473115	35.25071307	52.62023435	79.51862188	121.0960301	184.5100881	280.0295865	422.0575675	626.6114516	904.0051246	1250.666632	1641.09679	2020.824934	2324.06299	2523.168355
SbI3_mp-23281	18.99837366	10.69433058	6.682098199	5.572040916	6.086445223	7.560136535	9.638893768	12.50087437	16.97989623	24.3075447	35.94482678	53.86734534	81.27097347	123.2805738	187.5974688	285.5132824	432.2335264	643.5577063	928.5647554	1282.335004	1677.748968	2056.341887	2346.766652	2521.288923
ZrI3_mp-23282	11.86201999	7.373943987	4.973478483	4.370494749	4.749149088	5.758280852	7.436370492	10.15804602	14.47912453	21.03375823	30.83999273	45.96359709	69.82801742	106.9493485	163.1691207	247.4647282	373.2353417	555.0085935	801.051696	1106.577726	1446.215702	1768.978531	2022.33498	2188.462037
PtCl2_mp-23290	23.15377588	13.11380105	7.500966056	5.539010319	5.375425302	6.136273241	7.546276854	9.82514191	13.61309114	19.76608762	29.24949415	43.44885181	64.81867127	97.40082382	147.1823361	222.65184	334.7858377	494.6890335	709.3240771	977.4699063	1282.55559	1583.080717	1826.786614	1993.903636
BrF3_mp-23297	42.4570604	23.42258759	11.97931993	7.501777476	6.348393879	6.796214204	8.319346295	11.00389297	15.33774688	22.03255608	32.03283828	47.01136809	70.03094596	105.8007591	160.7561507	243.8973718	367.7697895	546.2265318	787.2456943	1084.86308	1413.168804	1722.587345	1954.779616	2083.048382
Rb3Bi_mp-23304	6.755634987	4.831854313	4.125560085	4.79354909	6.698644591	9.541212726	13.01048806	17.41086642	23.81902362	33.95031412	50.56096336	78.24374352	123.5156346	193.5612525	295.8252028	441.7784485	651.5429423	951.9387243	1367.743762	1908.776458	2545.70515	3186.236204	3715.768679	4081.814203
EuI2_mp-23305	13.35544231	8.09199576	5.385921943	4.820634824	5.498160753	6.872038304	8.684754918	11.24055868	15.39966022	22.29707989	33.21359369	49.87259744	75.13557674	113.7102346	172.7708	262.6076678	396.237501	586.4815457	841.89485	1162.670505	1529.31749	1887.853286	2172.245295	2364.553414
CuI_mp-23306	11.15673373	7.792969038	5.559768201	4.912611093	5.227008709	6.197515656	7.936440439	10.92291004	15.81640293	23.2986104	34.37662676	51.20648127	77.60628134	118.9166546	182.2599154	278.2256889	421.8122584	628.5036324	906.4897391	1250.247463	1632.175179	1994.114156	2271.031655	2433.334872
Na2O_mp-2352	12.81806262	7.481439316	4.60539685	3.795737102	4.257968888	5.677295616	7.937984738	11.14091085	15.8167893	22.96610733	34.17293613	52.06648674	80.75985044	125.71618	193.5346269	293.329091	439.1047287	648.6980071	936.8586298	1305.518237	1732.734783	2163.712251	2529.186593	2795.123663
SN_mp-236	26.1805588	15.06293449	8.605053427	6.043525804	5.770402385	6.971303302	9.407965237	13.13947451	18.56094721	26.44285948	38.10201277	55.99435206	84.29878949	128.8270499	196.711966	297.8475554	447.8034146	666.2298766	965.7948057	1338.335193	1750.090734	2144.113333	2451.082679	2625.979267
YH3_mp-23706	35.66982865	17.55775413	8.533922024	5.158602104	3.926570771	3.585353339	3.807392729	4.602294515	6.087585139	8.443514031	12.05557105	17.74432303	26.76888651	40.55032626	60.69751105	89.95083975	133.0729085	195.8717837	282.5616402	393.7957524	525.9166095	670.8447375	821.2364919	975.7384433
PdSe2_mp-2418	8.418316958	5.609837275	3.930698513	3.511116223	3.882914208	4.889216061	6.701620675	9.774582363	14.66133237	21.83494186	32.05617274	47.27319776	71.09036423	108.6084437	166.791369	256.2995237	392.4578223	590.6226324	856.1176266	1175.639838	1511.75704	1803.807421	1998.011545	2082.450726
P4Se5_mp-2447	20.62217095	11.07829685	6.280711332	4.825021019	5.063567982	6.344257689	8.460041068	11.5818125	16.32666646	23.62708138	34.71564696	51.57137244	77.55724006	117.7628843	179.3079323	272.3654638	410.9304391	610.2382077	880.0571871	1216.90324	1594.66956	1957.524612	2243.242123	2433.921256
As2Os_mp-2455	17.10755054	10.40156063	6.334904951	4.902999684	4.751735303	5.242207971	6.284481886	8.208950979	11.59934649	17.09100948	25.31620833	37.29636641	55.06598663	82.07178682	123.5004833	186.7267441	280.8700422	414.35618	592.2182796	814.6061871	1070.509454	1327.888186	1547.363567	1717.283299
CaH2_mp-24809	30.4380365	14.16085919	6.876616855	4.559235251	4.10910637	4.479993098	5.415516941	7.047886414	9.742555243	14.01259991	20.6161763	30.85972461	46.77410985	70.96103793	106.6778334	158.9029759	235.3699886	345.3491073	496.1306861	689.1760097	915.4522579	1152.767446	1380.084899	1599.66718
SiOs_mp-2488	16.89440584	10.79005152	6.678515216	5.089588168	4.764275055	5.080051103	5.973268576	7.77567036	11.03742664	16.3365991	24.2368577	35.699937	52.69189475	78.51516027	118.0718155	178.2824854	267.6731172	394.0941536	562.3969779	773.5456259	1018.973828	1270.294627	1489.866168	1662.27781
GaS_mp-2507	16.95547211	9.247067995	5.368042432	4.22766921	4.582431018	5.968811487	8.255759042	11.59828062	16.56726991	24.07244589	35.36183118	52.47412102	78.86028051	119.6686184	181.9946845	276.0121928	416.0786821	618.3643487	893.7050019	1239.187892	1629.321419	2009.318336	2315.372157	2523.563349
Mg3P2_mp-2514	13.93117112	7.740640926	4.665831189	3.898786271	4.456853315	5.987344746	8.373321825	11.76729774	16.77207428	24.41970662	36.27013154	54.90063722	84.38559438	130.2770245	199.6369885	302.4713428	453.5704416	670.7919828	968.2892599	1347.092135	1782.370957	2213.969629	2573.284692	2838.822943
Ca2Si_mp-2517	10.72244854	6.975415287	5.089956105	4.937780407	5.905554198	7.62255956	9.973109848	13.25445208	18.15431277	25.74815489	37.936136	58.13826617	91.37674866	143.2472388	219.4911107	328.9713539	487.4538151	715.5455985	1030.024377	1432.874725	1897.607641	2361.004136	2754.618641	3051.318965
NiO2_mp-25210	25.79608851	15.74544537	8.582210467	5.653683417	4.863882969	5.148449778	6.260467323	8.455062569	12.31262658	18.51677859	27.75117563	41.14539555	61.05467341	91.52143698	138.4944827	210.2704643	317.425227	470.5485074	676.2324036	933.1183343	1224.301236	1507.452896	1729.356233	1867.400876
MnO2_mp-25223	25.0132574	14.69516183	7.968697162	5.365288992	4.762313411	5.171630671	6.37328496	8.622055705	12.49185687	18.67833444	27.93939246	41.5385834	61.94465358	93.21587485	141.2227774	214.2177694	322.9605625	478.5180804	688.0128474	950.1501384	1247.309892	1536.573118	1766.388149	1917.824857
MnO2_mp-25275	25.08921041	14.75360555	8.006823344	5.39331362	4.783286293	5.184492726	6.375970894	8.613339921	12.4713808	18.6470526	27.90108981	41.50034166	61.91430966	93.19722229	141.2109859	214.1946202	322.8825635	478.297945	687.5191522	949.2355551	1245.827053	1534.404724	1763.617392	1914.858303
V2O5_mp-25279	29.2522649	16.54325324	8.782326531	5.750609331	5.10135532	5.708525737	7.253373534	9.867038667	14.02312888	20.4155329	29.98184204	44.3562716	66.44835197	100.6103078	152.6569325	230.7462368	346.5893631	513.7338918	741.1662718	1025.829301	1346.603488	1659.548651	1909.499676	2066.880934
S2N_mp-2565	25.19504753	13.28693951	7.106420607	5.086255055	5.036987392	6.124221018	8.139873598	11.26504713	16.05588394	23.33751952	34.26632343	50.85142164	76.56962165	116.573403	177.8581074	270.325715	407.8207712	605.7306329	873.9162512	1208.123251	1580.61536	1934.903138	2210.623526	2391.588007
GeTe_mp-2612	13.5739639	8.055874328	5.150878641	4.395029271	4.768473659	5.802209207	7.424535626	9.974016938	14.09704263	20.57285564	30.38801167	45.23216586	68.00913771	103.0162739	156.3100703	236.7972764	356.6097525	528.3774405	760.3514358	1051.623005	1382.951465	1707.633597	1974.841964	2173.50566
AlSb_mp-2624	14.4753078	8.075860544	4.971144661	4.23845929	4.794579987	6.167143078	8.17308805	11.03360447	15.44070173	22.40062227	33.23820352	50.0003129	75.96619144	115.8830721	176.2972801	266.6628443	400.0638719	590.9621879	850.1043467	1178.265659	1554.999686	1928.126094	2239.106304	2475.669631
K2O2_mp-2672	12.5266687	7.421180291	4.67175622	3.884850181	4.397946416	5.962184491	8.48391402	12.02168518	17.05514329	24.57915978	36.22720998	54.76377473	84.5869571	131.6284367	203.095001	308.9068496	464.3846874	688.9870849	997.6605426	1389.337807	1837.536504	2284.274316	2655.528792	2908.920338
Sb2Os_mp-2695	13.37138882	8.495325224	5.56559121	4.641884947	4.7571633	5.443345177	6.696487029	8.910981255	12.711277	18.74788591	27.71517755	40.8524346	60.54625228	90.61683563	136.6854131	206.9183371	311.8024447	461.3349546	661.4974484	912.1475258	1199.948489	1487.430988	1728.42195	1905.995659
BeP2_mp-27148	19.09389817	10.75240147	6.199377725	4.714484634	4.692605063	5.47109313	6.925085028	9.324083343	13.22823109	19.37286658	28.79108219	43.29712863	65.8925195	100.7388214	153.3090796	231.6098279	347.2202339	513.2223232	738.9281376	1023.713643	1348.117441	1667.537378	1935.495842	2142.47424
GdBr3_mp-27182	18.18326804	10.40508834	6.424733115	5.247503423	5.677463503	7.132236622	9.345376078	12.48749101	17.3061725	24.93159457	36.74478398	54.73896763	82.25618714	124.5797406	189.4122689	287.8659875	435.0110872	646.859482	933.1057981	1289.605149	1690.065526	2076.79537	2377.844568	2561.635144
SnI2_mp-27194	16.41976352	9.261253448	5.779082455	4.892039001	5.431657637	6.806563078	8.725963927	11.40249474	15.62539293	22.5045629	33.31484105	49.77588432	74.73522602	112.8576251	171.2462143	260.2470298	393.4048157	584.4529653	841.8419298	1163.277334	1526.450902	1878.131265	2154.592019	2336.843102
ReP4_mp-27267	15.38514077	9.091901998	5.465240719	4.278486244	4.321165361	5.08011663	6.515443683	8.964417292	13.01673533	19.31762356	28.59760058	42.20597392	62.72539307	94.22965879	142.6192629	216.4952798	327.3181087	486.7446428	702.0510452	971.9786925	1278.992234	1581.001511	1831.139712	2016.70454
V4O9_mp-27412	20.86207402	13.00852899	7.681065698	5.502772793	4.878555369	5.065396561	5.96255418	7.848023104	11.18597519	16.4913991	24.45754638	36.46919505	54.99045321	83.50648002	126.6844801	191.4610348	287.6706438	425.5421116	610.5677233	839.0624223	1093.084823	1336.913699	1534.394248	1675.100905
CrCl3_mp-27630	14.31808515	9.188352228	6.016345287	4.926888728	4.945078597	5.625682114	6.975837371	9.321352493	13.1383853	18.98748172	27.83530215	41.68452404	63.83207033	98.51213108	150.9520484	229.0984611	345.1330308	512.5643261	738.8755189	1018.580251	1327.284263	1619.756076	1851.94864	2009.063087
NiBr2_mp-27637	12.67337557	8.267261852	5.541222862	4.750875901	5.076995962	6.127860736	7.938062958	10.95095579	15.87618126	23.49131902	34.79515048	51.73471472	77.87582209	118.5673944	181.3080496	277.012254	420.3531938	625.9429173	901.4291081	1241.296301	1617.212684	1969.637228	2236.228524	2399.901091
Zr3N4_mp-277	21.15228355	12.11484587	6.814823716	4.935085032	4.686556589	5.27839836	6.532053984	8.702769824	12.36411478	18.24032735	27.18238195	40.55365702	60.79171273	91.70154379	138.6864914	209.3926201	313.9067121	462.737494	663.1066369	915.14499	1204.293889	1492.522318	1734.773334	1917.523935
Nb3Br8_mp-27771	13.46478056	8.56679357	5.653691376	4.707529904	4.807358865	5.554296932	6.991715324	9.483715072	13.5363357	19.69526519	28.8517632	42.90849742	65.0823829	99.62457914	151.9917599	230.5191914	347.6063899	516.4734631	743.9627717	1024.412102	1334.040404	1627.668524	1859.452265	2012.317752
B7H10_mp-27820	33.25518723	16.15914874	7.626024318	4.633100188	4.022544236	4.603480419	6.087803538	8.554487085	12.33778526	17.9884026	26.35984342	38.97205503	58.31576331	87.69560006	131.1166856	194.4820643	287.472675	422.4475304	608.1463717	841.9916008	1106.549602	1370.59717	1599.233222	1776.281626
Na2Te_mp-2784	9.475163782	5.51081717	3.669355853	3.373932685	4.205072746	6.039444259	8.730352767	12.26410288	17.1990688	24.73475269	36.7353653	56.12570642	87.3228285	136.1411552	209.6740939	317.9095454	476.3571044	704.7054243	1018.757278	1419.764027	1884.116743	2354.971559	2758.759925	3056.821735
NO2_mp-2789	37.30037287	21.23668647	11.2713263	7.130242656	6.107679892	6.748023241	8.594251054	11.68748186	16.42258758	23.48163262	33.96100268	49.92481187	74.95938715	114.1118858	173.6273983	262.171285	393.2349307	583.6660635	844.2946954	1168.242922	1526.241557	1867.665451	2130.93228	2277.56687
GeI2_mp-27922	17.64348175	9.810209715	6.02905275	5.013478058	5.543987953	7.046741251	9.233907538	12.26772457	16.91100007	24.31339147	35.86710667	53.53213593	80.53423344	121.9838196	185.4412723	281.9294239	426.3447552	634.3545684	915.4045724	1265.417639	1657.975374	2035.333969	2328.69514	2513.782274
TbCl_mp-27923	11.41495589	7.794475754	5.464202875	4.745520575	4.963630457	5.806021458	7.37025332	10.08039131	14.50309452	21.23069949	31.21540909	46.52367924	70.70564431	108.5194653	166.1149194	252.8073583	382.3235172	569.3132099	821.7741921	1134.650601	1482.809007	1814.683564	2073.187447	2230.904484
NdBr3_mp-27975	20.71437122	12.19267129	7.71571418	6.09475821	6.258022657	7.594228294	9.817384536	13.05404797	18.00364934	25.79935315	37.90139966	56.48794114	85.19456424	129.5690637	197.3236201	299.5564684	452.2847604	673.6478573	973.983841	1345.692727	1759.711517	2162.134403	2479.630609	2661.933943
Sb2S3_mp-2809	17.1807072	9.664384344	5.756641858	4.640289198	4.968038218	6.16594947	8.075190797	10.95980485	15.50206105	22.62159663	33.46321647	49.8601177	74.99288546	113.7844984	173.2866933	263.5844548	398.0655694	590.6238027	850.1457751	1174.36136	1539.350344	1890.159317	2167.077911	2358.05567
SCl2_mp-28128	22.06245117	12.06843044	6.882876265	5.269853747	5.58834265	7.219486757	9.988647518	14.02211605	19.8850143	28.54907268	41.49162876	61.3132836	92.46359856	141.4751283	217.0996687	331.6275606	502.4755233	749.3572278	1084.501632	1500.526283	1959.638143	2388.916291	2708.663637	2891.236463
ZrI2_mp-28241	11.70519272	7.465813348	5.117769358	4.532710355	4.933978773	5.971036069	7.689123904	10.48798886	14.96357367	21.79318198	32.03100739	47.78931845	72.5805953	111.0669341	169.2910489	256.4700613	386.2290041	573.2543511	826.0038016	1140.057969	1490.091691	1823.682925	2085.493928	2255.605009
MnBr2_mp-28306	17.42908554	10.04852077	6.0842064	4.923821414	5.285353708	6.583137504	8.620836212	11.63970792	16.36041168	23.79910546	35.22136846	52.58759327	79.2644334	120.496718	183.7890677	279.7580755	422.4219351	626.3948152	901.1084882	1244.337191	1631.409844	2004.306377	2295.869325	2486.270608
IrS2_mp-2833	15.58314084	9.876892136	6.186341702	4.856339386	4.749217508	5.327279498	6.568739227	8.849257147	12.77663987	18.98253613	28.1446158	41.53997311	61.69954149	92.69237096	140.4565743	213.5534856	323.0068594	479.3088006	688.0985738	947.076356	1239.054269	1523.082638	1752.538974	1912.667898
Li3P7_mp-28336	17.87301008	9.771524705	5.566956679	4.287636851	4.539891226	5.789313327	7.888202738	10.99434749	15.6643811	22.81145726	33.78752186	50.85185712	77.66901675	119.3537655	182.5075265	276.4515363	414.8227885	613.8591477	885.8233539	1230.267385	1623.496697	2011.017631	2330.150451	2559.066843
P3Ru_mp-28400	17.65151278	10.55452713	6.279777898	4.817697698	4.785226361	5.556482198	7.034105423	9.546932394	13.74032803	20.38905505	30.39991556	45.30512291	67.91060685	102.6062546	155.6580955	236.0018347	355.4137728	525.9588926	755.4631415	1042.943292	1369.607927	1689.208066	1949.068365	2134.22514
Br2O_mp-28460	23.68775743	12.82528461	7.101745085	5.243838709	5.204679456	6.150426797	7.864112248	10.58628968	14.94397932	21.76271651	32.04816689	47.45465346	70.97038687	107.3356302	163.400054	248.9109869	376.6684715	559.6560326	805.3417515	1109.597336	1447.700517	1767.175558	2012.703443	2174.169065
LaBr2_mp-28572	13.28114419	8.099015869	5.393258818	4.800249256	5.378102557	6.645248563	8.496314254	11.288574	15.75231324	22.82662633	33.79153304	50.80705999	77.39228892	118.4915424	180.7897611	274.0625735	411.8906123	608.6981648	873.8844832	1205.52426	1579.198379	1938.466359	2224.047474	2424.512142
Ca5P8_mp-28879	14.13813713	8.164168379	5.096781444	4.360988514	4.956977806	6.463874346	8.748189378	12.0488327	17.0664698	24.87081719	37.01861135	56.09419341	86.2166271	133.0456528	203.9043523	309.2230117	464.0147164	685.6587193	987.3159304	1369.090934	1804.31997	2229.261005	2574.741393	2824.410779
PSe_mp-28885	20.64986636	11.19588224	6.429768698	4.940402621	5.219898859	6.675905536	9.113049708	12.64613234	17.84516025	25.66968014	37.47438681	55.48286035	83.4311329	126.8349867	193.1965482	293.2460202	442.3416719	657.9298166	951.0321892	1316.283301	1723.77665	2114.39451	2419.885525	2612.33012
SrC20_mp-28905	24.44196345	14.24014186	7.963853468	5.452173128	4.644398332	4.656961902	5.316496632	6.806777024	9.468492854	13.71343065	20.17994556	30.1365259	45.67886508	69.5157561	105.0503916	157.5407417	235.0543193	346.6333713	497.8729702	686.9308094	900.8388938	1113.65374	1299.80469	1452.185079
Ba2S3_mp-28978	13.44133498	7.778302242	4.947290008	4.313993143	4.992832615	6.567981602	8.824063856	11.93416302	16.62846362	24.04890061	35.72530112	53.98015077	82.5000056	126.6342853	193.7030341	294.1116919	442.2424923	654.1687852	941.8099153	1305.536284	1721.927575	2131.729698	2464.775133	2699.308298
KSb2_mp-29055	9.444901781	6.224356221	4.637754783	4.613588375	5.64092247	7.400596043	9.822287912	13.27628746	18.52955878	26.65836827	39.38982407	59.79274706	92.52548372	143.2627323	218.7130393	329.1035045	490.6820007	722.9994107	1041.035465	1445.779596	1909.910418	2365.999297	2738.463781	2998.767959
PI2_mp-29443	18.90903945	10.38948722	6.268499476	5.136621369	5.655895809	7.2371376	9.601208886	12.89295263	17.85134429	25.62471843	37.65995634	56.08892661	84.44376565	128.2086426	195.3228805	297.2863445	449.7873164	669.5474184	966.6145196	1335.920915	1747.795252	2139.835852	2440.072361	2624.626123
MoBr2_mp-29555	17.09560122	9.697451483	5.867540316	4.717068437	5.079531006	6.433192865	8.581823733	11.70597114	16.47985222	23.90535353	35.20125244	52.18411591	77.99112934	117.6124682	178.3092514	270.539649	408.4790887	607.233678	876.1842126	1212.073405	1591.087802	1960.103986	2253.150542	2441.835421
MgC2_mp-29771	19.81615169	11.17857172	6.269085499	4.440286834	4.325771279	5.312670802	7.249056262	10.23320405	14.65802062	21.23587165	31.12226858	46.37063318	70.36863508	107.7266838	164.0570047	247.2417557	369.7840256	547.6699707	792.5157306	1101.619466	1452.548557	1801.692445	2093.982745	2294.938464
SnBr2_mp-29862	20.96199948	11.76881887	7.144856967	5.648117452	5.940446838	7.380159242	9.675392913	12.94030284	17.86151069	25.54878875	37.42878604	55.62753984	83.67743449	126.9961699	193.2619954	293.6162096	443.8092026	661.2076527	955.7302323	1320.375488	1725.403277	2113.758796	2414.832261	2592.556784
CoBr2_mp-30033	12.10982425	7.913598237	5.341302248	4.544739152	4.747919032	5.609515663	7.200828345	9.918896599	14.31159595	20.95155275	30.74623854	45.6750407	69.18411155	105.9848293	162.2804226	247.4480158	375.156155	559.8276872	808.8827801	1115.971431	1454.35209	1772.833398	2019.123521	2173.818889
AuF5_mp-30103	31.10599188	17.43599641	9.034886017	5.762733678	4.71362982	4.663010986	5.335956059	6.929448415	9.871706982	14.63212914	21.69597611	31.97122412	47.33091131	70.86995787	107.1399591	162.6608002	245.740688	364.100338	521.2939184	714.1494648	928.3760117	1134.087044	1300.638074	1423.128884
AsCl5_mp-30106	21.20899034	11.45027564	6.503062199	5.03757824	5.305518777	6.627072808	8.811792307	12.07595663	17.06571158	24.7226691	36.34595556	54.14538102	81.90695378	125.2820709	192.0713242	293.3189987	444.045391	660.2929721	951.8841032	1313.723778	1714.427204	2089.650894	2374.028089	2556.804205
V6O11_mp-30518	20.32846776	12.5083088	7.247857438	5.183025688	4.706313995	5.070453464	6.174606535	8.33882824	12.13104368	18.17647949	27.17885216	40.44318132	60.47728404	91.19338652	138.1542151	209.408458	315.7167805	467.9661158	672.471831	926.62743	1211.763353	1486.363109	1705.467774	1856.269772
Tl2S5_mp-30520	18.51711752	10.27356293	6.073933287	4.839420255	5.135161475	6.317400884	8.141494252	10.80145295	14.97064494	21.62533546	31.98746121	47.87717992	72.29821496	109.8401616	167.04116	253.245706	381.0218243	563.7630344	810.4661994	1119.881402	1471.241648	1814.843366	2092.651309	2288.012822
Ti2Sn_mp-30875	11.73220626	7.898908003	5.558465764	4.902903812	5.219735767	6.163165716	7.789182219	10.48672819	14.81005331	21.41299533	31.41486862	47.07315268	71.97661679	110.5097465	167.8743418	252.1744468	376.3704976	555.6147274	800.3307761	1109.668963	1463.886118	1817.201889	2115.946983	2330.100344
B17F27_mp-30935	39.21370733	21.80689343	11.1531239	6.886785949	5.780466278	6.239955509	7.778342987	10.45139911	14.6776911	21.13118597	30.81616433	45.55084392	68.49604226	104.1766711	158.3466608	239.0277757	358.2961501	530.7621248	765.967789	1059.079935	1385.502048	1699.188985	1944.330613	2089.889864
NbCl4_mp-31040	18.81066543	10.6467391	6.300424333	5.001823079	5.237420196	6.365736832	8.233898187	11.12691829	15.7157187	22.90324422	33.90622279	50.79564974	77.09680157	118.0055242	180.6624763	275.2310304	415.4814626	615.9193728	885.5674195	1220.840622	1594.660017	1948.849832	2224.25478	2411.927589
TlS_mp-322	13.38856964	7.956183465	5.147279182	4.471470084	4.925279865	5.997912791	7.552748578	9.912464299	13.77085872	19.99731791	29.64478562	44.33806914	66.7814242	101.0486495	152.9778118	231.0621039	346.6162951	511.4081906	733.9021908	1015.418864	1340.418327	1665.066618	1938.420863	2149.066644
AuCl_mp-32780	22.47474703	12.91863689	7.475312257	5.457007914	5.151357373	5.692716563	6.804206146	8.701522648	11.99579112	17.48002433	25.95640523	38.43009191	56.74097965	84.1742918	125.8440929	189.0846119	283.252648	417.6136927	597.9699683	824.1899594	1085.316208	1350.196753	1574.210984	1734.626698
Bi2Te3_mp-34202	12.88701524	7.786807952	5.079324354	4.360773477	4.651822804	5.487432661	6.825693575	9.028315068	12.71030535	18.55945718	27.38827997	40.58681749	60.61759162	91.23868232	137.9128675	208.7546061	314.6050399	466.3264432	670.7346568	927.2499745	1219.936626	1507.843549	1744.434166	1917.829454
PrN_mp-343	13.99894102	9.493068568	6.369761069	5.267707309	5.2957458	5.985611869	7.35430518	9.824072464	14.05342613	20.76845282	30.88604349	46.12487545	69.56368754	105.7193576	160.7928012	243.7656696	366.7795014	542.1594008	777.3513808	1070.732707	1403.272163	1728.324114	1991.149405	2169.4375
Rb2Te_mp-383	6.713972679	4.302635737	3.324562671	3.66081582	5.182805816	7.734387402	10.93351405	14.82382208	20.38794712	29.34382411	44.11192478	68.27163334	107.0227943	167.188621	257.4387505	390.1262097	583.3036423	858.9453314	1236.80548	1724.50471	2296.585024	2872.071975	3349.486337	3694.806902
Sc2S3_mp-401	14.61223218	8.618148751	5.380427484	4.523281156	4.995390802	6.339035225	8.452569684	11.63266337	16.58650496	24.30545335	36.17612493	54.54821987	83.30285754	127.9557844	195.8665273	297.5536828	447.7711976	662.9549916	954.8011026	1322.184091	1738.246045	2140.382955	2461.313423	2685.306824
NaS_mp-409	12.92595025	7.604953989	4.881150485	4.306973745	5.033296131	6.690259701	9.128490993	12.55846496	17.69802453	25.71356622	38.37710296	58.62843214	91.0307317	141.6095409	217.8154172	330.1773645	494.363283	729.3406261	1050.483	1459.582719	1929.272028	2391.304542	2770.118277	3045.488738
TiO2_mp-430	29.87662292	17.57081669	9.328828996	5.93812841	5.018768771	5.322368677	6.478175685	8.612213993	12.18699555	17.85123303	26.42245981	39.2770114	58.91724788	89.2022943	135.3976091	204.8279791	307.6736077	455.4027128	655.7905241	907.310999	1193.390977	1475.936203	1704.577534	1851.131027
Rb2Te_mp-441	6.696462401	4.128655629	3.094011685	3.30499751	4.633344028	7.000550224	10.08044109	13.82332715	19.07452651	27.46016498	41.29279155	63.94373608	100.3117845	156.9278374	242.2046017	368.1966833	552.7072958	817.4364086	1180.75108	1647.421515	2192.191925	2742.218868	3202.945246	3534.671887
GeO2_mp-470	30.35371734	17.36401336	9.02852449	5.741568689	4.862035249	5.136018019	6.223959721	8.290351998	11.81892106	17.42156105	25.7746212	38.0099437	56.35352756	84.47850211	127.6729343	193.344263	291.2598621	431.6350954	620.9073064	857.4254131	1125.530869	1388.380989	1599.539069	1738.179842
Te3As2_mp-484	14.54215437	8.59911019	5.448321403	4.58094092	4.877013411	5.822070645	7.336937743	9.761021117	13.72847311	19.996567	29.52360563	43.95527297	66.12598182	100.239651	152.232985	230.8276075	347.8266824	515.31227	740.7547487	1022.378246	1340.487353	1649.169365	1899.688764	2082.864686
MnP4_mp-487	12.63380168	8.013986879	5.165312485	4.253939884	4.421994705	5.299517326	6.932944722	9.714756651	14.24145991	21.14415142	31.27692551	46.40812413	69.7353457	105.865164	161.098358	244.8750631	370.6882289	553.0635482	800.8957035	1110.850893	1458.92804	1794.175916	2062.758915	2246.687409
SrSi2_mp-496	10.89202223	6.970860783	4.856527061	4.382692114	4.859103243	5.968783961	7.727545208	10.44462774	14.59794827	20.82804935	30.35800827	45.6221558	70.34177601	108.8188562	165.8568504	249.1841648	372.098486	551.1487682	798.4827256	1113.594524	1475.242026	1836.924721	2147.882692	2382.479448
MoF5_mp-504759	32.24187491	17.45054046	8.914940195	5.75617252	4.882749349	5.043108633	5.951742341	7.818463791	11.12079881	16.42161888	24.36940016	36.12418251	53.90230792	81.21864867	123.1169117	186.8109569	281.7526925	417.2536346	598.2173428	821.226152	1068.759558	1304.73567	1493.003742	1628.814951
Cs2Te13_mp-505464	11.26129203	6.99166926	4.812304521	4.436440057	5.099562963	6.386905992	8.214367921	10.94859453	15.3152639	22.22508485	32.89138051	49.34813825	74.91518904	114.2883285	173.9161828	263.360819	395.966851	586.0362697	843.4574693	1167.953578	1537.6744	1897.922007	2188.238724	2393.78413
Fe3O4_mp-505595	14.71102877	10.12030322	6.542576356	5.059232668	4.777113703	5.238641174	6.486054862	8.931099003	13.17588444	19.80122741	29.48254245	43.69428307	65.31575994	98.68398596	149.8578705	227.792077	344.7713307	513.1149376	739.0040449	1017.421297	1325.604352	1616.984953	1841.34717	1979.184368
Fe2O3_mp-510080	23.67888842	14.69873983	8.226832209	5.581187564	4.896775328	5.213421752	6.319606544	8.489998203	12.32284684	18.53074767	27.85055638	41.47958276	61.82792986	92.96373157	140.8384471	213.7445536	322.2353674	476.86742	684.3727466	943.8658694	1238.806205	1526.568712	1753.86016	1898.956633
SbN9_mp-510350	31.34354201	17.67241238	9.590916184	6.306089319	5.619361138	6.391582094	8.265819702	11.29545293	15.87795396	22.71077713	32.89191858	48.41654671	72.69254368	110.4880308	167.7112528	252.6330672	378.1998298	560.5896847	810.3088755	1121.363651	1467.314047	1802.218264	2069.175739	2231.334229
NiO2_mp-510753	24.3380798	15.08521555	8.356163992	5.591527399	4.843746135	5.12193701	6.218313462	8.41986739	12.33102412	18.64088623	28.01253673	41.5515589	61.61816215	92.30668114	139.6911041	212.2644805	320.7411728	475.6032668	683.1415287	941.723011	1233.913786	1516.393043	1736.096553	1872.392116
GeSe2_mp-540625	17.94737848	9.717929705	5.682307325	4.565018003	4.92292475	6.163466037	8.091727443	10.92989777	15.34659245	22.2788302	32.89376769	48.99535663	73.64155259	111.5460542	169.4869122	257.2286484	387.8530454	575.0891111	827.8526105	1144.139863	1501.143296	1846.536178	2123.360452	2320.845313
OsF5_mp-540830	31.19934241	17.35487468	8.973124796	5.71975148	4.667330337	4.599250156	5.242453308	6.784090826	9.630880228	14.23104063	21.0698648	31.07080962	46.08946083	69.1202479	104.5200259	158.5678787	239.3739631	354.5562778	507.5915201	695.1743223	903.149298	1102.746157	1265.263357	1386.843702
SeBr_mp-540943	20.33715034	11.07165227	6.460746722	5.117437185	5.477105966	6.884919209	9.096471093	12.29274262	17.16726028	24.74550506	36.3153605	53.86166147	80.78987943	122.4364566	186.5155455	284.0960885	430.0292922	639.8602228	922.8234705	1274.125116	1665.162874	2035.528523	2318.185286	2495.197431
K3As11_mp-541000	13.81321967	7.731389263	4.809130355	4.170750027	4.853219914	6.456213894	8.796924336	12.05807791	16.94990321	24.57804856	36.44084368	54.8636747	83.56338618	127.9068287	195.2360968	296.0844162	445.1098959	658.6578352	948.6125	1314.651484	1731.907845	2140.331096	2472.688478	2712.969905
SiI2_mp-541053	18.5761453	10.26090014	6.272929703	5.172241943	5.730901064	7.405176794	9.914358917	13.36732483	18.49459578	26.49703837	38.93685155	58.12277515	87.80724377	133.6806681	203.8247455	309.9817456	468.5970188	697.7084406	1008.178391	1394.036957	1823.905517	2234.313833	2550.308988	2741.730201
Nb2Se9_mp-541106	17.27133225	10.01906212	6.134853062	4.986584999	5.196514174	6.139092816	7.680279078	10.13974166	14.17777587	20.62522944	30.54530297	45.70053202	69.07248062	105.0644321	159.8212298	242.2185305	364.1816355	537.9702445	771.2590663	1062.162598	1390.079255	1707.436487	1964.275053	2152.59497
VO2_mp-541404	23.24657879	13.98180575	7.937725909	5.574642937	4.974053013	5.257632535	6.268869487	8.293693396	11.87427164	17.64465563	26.37182979	39.43164531	59.33521758	89.87641288	136.3360817	206.32216	310.0890694	458.1182004	656.5572395	902.8822257	1178.980695	1445.04094	1658.87124	1810.042973
ReSe2_mp-541582	18.48566915	10.63548532	6.283617278	4.849626834	4.810638964	5.45436204	6.602494784	8.538195772	11.87751487	17.35551179	25.71795488	38.01309967	56.22365958	83.80404988	126.0768103	190.6177181	286.7933542	423.4490233	606.170859	835.2874689	1098.976269	1363.074193	1585.469411	1755.321372
GeBr2_mp-541610	20.62277188	11.576403	6.990749465	5.505870141	5.833444508	7.394121413	9.944797403	13.58101552	18.93504615	27.08414201	39.49305219	58.46671878	87.87297235	133.5278364	203.4682996	309.2772104	467.6099767	697.2673789	1009.177009	1395.408575	1823.068834	2231.069393	2545.157991	2726.789724
KSn_mp-542374	8.560679656	5.479835604	4.128642703	4.346742795	5.779054797	8.14223033	11.16190127	15.05466939	20.7533804	29.76630103	44.37966201	68.279404	106.8601155	166.7119286	255.5569069	384.693701	571.8357576	839.1482517	1206.044237	1678.445753	2228.860981	2778.73648	3237.710786	3579.038851
Yb3Se4_mp-542601	11.46024877	7.598830556	5.205889725	4.46081344	4.642880453	5.438230388	6.944135168	9.581435907	13.91091888	20.48264711	30.1092737	44.59229592	67.12305381	102.1064298	155.4259109	236.0388704	356.9044078	531.6429385	767.8619738	1061.87282	1392.083263	1711.605025	1966.513096	2129.961994
GeS2_mp-542613	19.08917795	10.54120893	6.113997405	4.723327936	5.025831271	6.503505632	9.010447076	12.67567486	18.04615246	26.04539118	38.01184444	56.21342924	84.50956328	128.594506	196.1632206	298.1679641	450.3282989	670.643402	970.6485314	1345.013086	1763.087451	2164.100637	2477.256035	2671.91046
Rh2O3_mp-542734	20.28757533	13.32211689	7.980076271	5.695487263	5.017868195	5.19295225	6.126938462	8.159130943	11.87299254	17.87598809	26.75801239	39.61717554	58.76603635	88.04402195	133.0697818	201.8153258	304.3204357	449.8579124	643.0424324	881.257057	1148.481658	1406.909221	1612.743495	1750.444249
SN_mp-542738	26.92888054	14.69840227	7.923656054	5.488907503	5.261803608	6.343102901	8.499517573	11.85626853	16.88941737	24.37317054	35.47711818	52.31115693	78.52928396	119.4301878	181.9500666	275.855215	415.4805097	617.6872261	893.3448452	1236.902298	1619.081196	1984.143473	2267.57728	2439.422048
AsS_mp-542810	20.41114209	11.07588923	6.344129041	4.880293157	5.159125899	6.583754464	8.965164243	12.44011297	17.59462444	25.37811596	37.10453372	54.93255727	82.52842017	125.3735044	191.0110162	290.2150194	438.1603573	651.7825341	941.6879202	1302.752379	1705.488398	2090.587951	2390.525619	2580.262486
Fe2O3_mp-542896	23.05782675	14.09946905	7.883723651	5.406857371	4.825662782	5.225625101	6.413597566	8.670943563	12.60176906	18.92512419	28.39580847	42.2552291	62.98056829	94.71826428	143.518806	217.8447461	328.5481714	486.5751463	698.932859	964.6122596	1266.377159	1560.545531	1793.278025	1943.43385
Ag2O3_mp-546190	14.65588134	10.18316793	6.646662962	5.172775817	4.887028724	5.333902142	6.561365683	8.993511846	13.24798315	19.90988363	29.62023692	43.78655606	65.25074461	98.42091469	149.5568591	227.7944644	345.2812088	513.7316515	738.7139387	1015.549192	1322.931593	1615.38322	1841.888047	1981.272101
La2O3_mp-553347	20.73403672	11.33451607	6.409843742	4.827594516	4.859409915	5.763653928	7.309231312	9.693312063	13.51511579	19.62044007	29.07020257	43.48394287	65.56422878	99.40078654	150.7366329	227.7492423	341.5098197	503.9729457	723.5147967	999.9258014	1316.218612	1630.084337	1891.671302	2086.463666
ZnS_mp-553916	16.62835269	10.40154028	6.330498856	4.835984114	4.871077217	5.885712391	7.754729521	10.73926062	15.49028009	22.88302278	33.95932865	50.41256396	75.38113086	113.9058235	173.1439717	263.0533413	396.8581725	588.7572852	848.4551645	1175.240918	1549.126682	1918.713229	2214.067321	2397.029133
TiO2_mp-554278	28.50192886	16.81299377	9.228631534	6.028387077	5.24513242	5.764123698	7.226361658	9.713854529	13.65063033	19.70798233	28.84851643	42.76089942	64.38566834	97.98894099	149.0474965	225.1668891	337.7040064	500.3960555	722.4965259	1000.699955	1314.697877	1624.156313	1875.297509	2032.160321
ZnS_mp-554503	16.60684407	10.38761852	6.322476454	4.831871582	4.868981215	5.884552285	7.754199435	10.74014536	15.49446798	22.89286181	33.97661122	50.43815692	75.41611452	113.954491	173.218759	263.1785345	397.0660401	589.078035	848.9165953	1175.878985	1549.96214	1919.689679	2215.084663	2398.087884
CrF4_mp-554855	33.07183405	18.19214157	9.196985737	5.816647035	4.939788086	5.237143889	6.385885135	8.5915051	12.3781115	18.38077717	27.29637621	40.33481228	59.89830153	89.93897385	136.1757048	206.6810257	312.0395419	463.0688949	666.1529493	918.3703742	1200.470886	1470.315934	1680.461333	1816.604206
Ta2O5_mp-554867	20.03944395	12.02669123	6.909944626	4.854451019	4.241314774	4.371110168	5.155988831	6.847395359	9.843126389	14.52625241	21.35302425	31.34394735	46.4863516	69.7622537	105.363365	159.5366393	240.8251571	357.6634295	514.2182104	707.6235863	924.6213654	1137.819775	1318.080751	1455.625881
ZnS_mp-554889	16.27084659	10.17336169	6.200835828	4.751494575	4.808340799	5.842748866	7.740678252	10.76625549	15.56932299	23.01954832	34.14739226	50.63626788	75.62637272	114.1776263	173.4895165	263.5936077	397.8243732	590.5084882	851.4338476	1179.866802	1555.692923	1927.273931	2224.254157	2408.001035
ZnS_mp-555214	15.42308297	9.676945448	5.964824139	4.696240322	4.847985691	5.913798144	7.813026641	10.87806218	15.8321294	23.58570749	35.17149605	52.28100607	78.13638546	118.0281419	179.6316708	273.6608384	413.9386118	614.685981	885.4487229	1225.641795	1613.668031	1992.946407	2291.28508	2477.358448
ZnS_mp-555311	16.63414344	10.40470396	6.33235352	4.836504482	4.871034483	5.885978679	7.755909533	10.74115457	15.49180817	22.88270992	33.95610096	50.40629904	75.37227473	113.8936004	173.1232347	263.0129758	396.7861476	588.6498036	848.3146486	1175.061192	1548.903626	1918.487241	2213.894487	2396.874472
V4O7_mp-555597	18.58069408	11.7400851	7.010991945	5.120703689	4.680760391	5.035481866	6.12499467	8.281602348	12.05294027	18.01919634	26.86090532	39.91988328	59.74452236	90.19110829	136.6597184	207.0735884	312.2572341	463.2404849	666.1668824	917.7855167	1198.981377	1469.035569	1684.631849	1832.414367
ZnS_mp-555664	16.60872467	10.38839122	6.32289176	4.832149533	4.869296971	5.885058796	7.754981287	10.74116285	15.49559236	22.89400333	33.97792025	50.44019004	75.41982585	113.9609838	173.228853	263.1926493	397.0851034	589.1048558	848.9553399	1175.9322	1550.030097	1919.774232	2215.187944	2398.204186
CoF2_mp-555908	33.22026056	19.9547541	10.56871152	6.577749547	5.393993907	5.57767684	6.696999756	8.882644269	12.61518196	18.52901551	27.35627093	40.34909554	59.94911971	90.1110788	136.3865781	206.4797844	310.8009128	460.6647895	663.293143	916.502928	1203.102524	1483.680101	1705.061751	1836.304042
C37F21_mp-555948	40.47823031	21.63369428	10.51499885	6.321352942	5.182058736	5.42362076	6.581925581	8.765094661	12.42669161	18.20661658	26.93474725	40.03827793	60.07393503	90.89949552	137.7342765	207.9248933	311.8140409	461.042107	663.1958915	915.5309188	1198.73721	1472.444633	1689.755729	1832.022317
ZnS_mp-556161	15.02024019	9.475601351	5.89399434	4.696420593	4.882358057	5.959893431	7.864082264	10.95312576	15.97315614	23.84440207	35.60404712	52.96791205	79.21764239	119.7420257	182.3783852	278.0863466	420.9357532	625.2368723	900.4680824	1245.861276	1638.973598	2021.451932	2320.647466	2507.498781
ZnS_mp-556392	16.62409833	10.40031723	6.330112384	4.833811268	4.867541723	5.882079908	7.752226857	10.73784608	15.48811592	22.87681827	33.94500231	50.38560799	75.33585029	113.8325154	173.0238108	262.8554559	396.5477401	588.3112063	847.859416	1174.468959	1548.17104	1917.671981	2213.071399	2396.007705
V8O15_mp-556566	21.72708464	13.67030467	8.008820002	5.691173697	5.048502711	5.271143901	6.235550632	8.247079378	11.85127389	17.66623907	26.43087833	39.50766812	59.41294823	89.93612147	136.3392361	206.23262	309.88384	457.666541	655.3772945	900.0378003	1173.304532	1435.426398	1644.03025	1787.093471
MnF2_mp-556585	33.96470578	19.9624291	10.59350398	6.691130932	5.605041121	5.908394735	7.159360392	9.466229936	13.30339003	19.34750311	28.46375912	42.13165354	63.05352147	95.3906925	144.7927543	219.0954858	329.2286863	487.4945194	701.8448915	969.4849451	1271.258521	1565.722603	1798.49778	1938.364256
HgO_mp-556859	24.66275085	14.84710536	8.380402581	5.783993809	5.009141618	5.048133292	5.661562959	7.086250335	9.829158983	14.47739213	21.56201912	31.79869094	46.7176948	69.1928603	103.7178149	156.5212191	234.9108858	345.3330431	491.7485246	675.1158066	888.2088329	1105.746501	1292.923828	1436.733795
ZnS_mp-556989	16.21837011	10.13453776	6.177870355	4.742679225	4.808107737	5.846921164	7.747190268	10.77750253	15.59316756	23.06753417	34.23176073	50.76937142	75.82550739	114.477199	173.9614703	264.3630911	399.0524606	592.3470899	854.0242047	1183.382954	1560.216724	1932.498979	2229.687424	2413.703606
TeO2_mp-557	32.36000189	18.72451369	10.44213011	6.934433839	6.080497316	6.664912918	8.258824904	10.92054619	15.10245758	21.5190372	31.14147355	45.63371519	67.95342174	102.5325916	155.2522159	234.3790826	352.0727628	522.5824179	754.4854267	1042.212834	1363.095585	1675.839217	1925.438759	2073.888562
ZnS_mp-557175	16.63972632	10.40834219	6.334359572	4.838328743	4.872789972	5.887179587	7.755957279	10.73988804	15.48968211	22.88063245	33.95512771	50.40731806	75.37601326	113.9013679	173.1384043	263.0413442	396.8320099	588.7097539	848.3797235	1175.128143	1548.968874	1918.52074	2213.864556	2396.82249
RbS_mp-558071	9.385775419	5.572712419	3.811358349	3.676942782	4.765732829	6.945265868	10.02922397	14.05424592	19.74191059	28.48833555	42.38826193	64.72595414	100.5291645	156.6165163	241.6746859	367.9188517	553.2620275	819.3353666	1183.482516	1647.353187	2180.599679	2706.997049	3135.49236	3433.109815
Cr8O21_mp-558855	26.73611924	14.76696227	7.756276396	5.203001082	4.708183271	5.258335306	6.619512914	9.016034848	12.99623769	19.25929868	28.63444231	42.52679191	63.54950947	95.82635652	145.1908553	219.8973039	331.0445541	490.4698131	705.9185993	975.6536814	1280.691949	1577.471126	1815.64081	1978.507138
VO2_mp-559445	26.94694736	14.06470933	7.382506929	5.151371694	4.858659068	5.535217831	6.943867973	9.292447026	13.11786468	19.14915149	28.35813398	42.39135686	64.0557095	97.46181025	148.2001228	224.2522523	336.6578015	497.4242475	714.5115159	986.0743132	1292.449568	1590.568754	1835.802619	2020.889645
VF3_mp-559931	34.78788174	19.17016481	9.705211855	6.124599265	5.174098644	5.438614507	6.550848744	8.691813327	12.37758229	18.26703596	27.1245739	40.24154701	60.06949027	90.54734891	137.2889402	208.1759041	313.6092786	464.3593541	666.9334452	918.6240204	1200.503603	1470.878502	1682.342172	1820.037171
SbO2_mp-560098	28.1879062	15.69061609	8.308251086	5.53673884	4.942692293	5.430249098	6.699036852	8.922125951	12.60852304	18.41624105	27.08687185	39.82988289	58.96311364	88.29757196	133.3587777	201.9403409	304.3223969	451.1869448	649.116275	896.096396	1175.527237	1449.163469	1669.728647	1817.702494
ZnS_mp-560725	16.60405399	10.38481442	6.32080085	4.831109196	4.868932097	5.885256473	7.755790314	10.74278725	15.4984278	22.89860783	33.9849697	50.45059257	75.43506259	113.9836826	173.2636796	263.2472885	397.1704478	589.2339988	849.1426763	1176.19226	1550.369859	1920.180423	2215.634216	2398.680998
ZnS_mp-561118	16.62156048	10.39763135	6.32841157	4.833666313	4.868474651	5.88353831	7.7538132	10.73975249	15.49134559	22.88303633	33.95625555	50.40428691	75.36525637	113.8783773	173.0969055	262.9735129	396.7326799	588.5826253	848.2347832	1174.970438	1548.807521	1918.396871	2213.814768	2396.786497
ZnS_mp-561196	16.61279995	10.39244016	6.325394615	4.832416363	4.868030382	5.883030811	7.752731671	10.73840361	15.4909062	22.88505505	33.96184212	50.41361314	75.37806104	113.8958997	173.1252188	263.0254366	396.8232132	588.7201154	848.4223967	1175.219478	1549.125148	1918.742398	2214.127289	2397.092203
TeO2_mp-561224	35.63336022	20.65045022	11.44028469	7.47597274	6.407332194	6.848909181	8.290772382	10.76255955	14.71098478	20.8613344	30.21296923	44.45147957	66.51512673	100.748755	152.8439296	230.7510697	346.2161865	513.0794863	739.6957889	1020.657986	1333.99271	1639.728669	1884.445082	2030.978441
Pr10S19_mp-561375	12.26858732	8.068525776	5.489990472	4.791332428	5.197432228	6.316833785	8.162773892	11.16667844	16.05363344	23.66727844	35.13323261	52.54392422	79.56454214	121.5222664	185.7109114	282.7369043	427.1436634	634.0191106	912.4610395	1259.172347	1647.723901	2018.61471	2307.165002	2493.368283
CdI2_mp-567336	16.53585651	9.860892618	6.340834936	5.28343565	5.690258284	6.990923327	8.913165457	11.67330124	16.06832336	23.23895432	34.48594783	51.54149043	77.31337713	116.6158888	176.7318474	268.2177309	405.0861204	601.8335771	867.2482405	1198.72312	1575.038994	1945.120373	2239.307766	2421.277346
HgI2_mp-567471	16.03291137	9.375726799	5.933592292	4.99814438	5.369534834	6.388430792	7.803913188	9.922982183	13.52747603	19.59957304	29.15610098	43.46465805	64.73093089	96.87401674	146.1418703	221.5589951	334.3106138	495.0046356	710.3701897	980.5883968	1290.586726	1597.029066	1845.065391	2019.009847
CdI2_mp-567483	15.47379776	9.245300174	5.954897541	5.036621625	5.515394519	6.843465495	8.764690148	11.51564837	15.90103873	23.04309088	34.19930012	51.04590451	76.44052553	115.1819425	174.5980664	265.2588923	400.9025299	595.4466382	857.5489849	1185.566917	1558.976819	1925.617364	2216.282042	2399.829092
PtCl2_mp-567484	20.84499237	11.88703263	6.892555443	5.223009345	5.155392808	5.903231629	7.259167835	9.49837537	13.26979253	19.38837645	28.75804768	42.72813045	63.75131398	95.88342416	145.1638917	220.1492496	331.6793763	490.3662419	702.8209805	968.1639047	1269.872742	1565.662543	1805.683666	1976.958037
PbI2_mp-567503	20.532686	11.49812434	7.246129054	5.970169648	6.299267535	7.456874935	9.045830033	11.28631994	15.04149818	21.54032009	32.20768303	48.82011637	74.08504311	112.3791933	170.4709631	258.5099436	390.3260657	580.320984	836.659589	1155.145635	1513.50881	1863.100086	2140.024113	2313.532776
TaI4_mp-567537	13.00031709	7.680735009	4.994881005	4.381871029	4.868013127	5.986498056	7.651349118	10.21906534	14.38215205	20.96036023	30.93146563	45.91123508	68.73986928	103.8183426	157.6018488	239.5991845	362.3768293	538.4209442	775.2111517	1070.663676	1403.500464	1723.537003	1977.411046	2156.689658
SiC_mp-567551	24.04080461	13.41012396	7.138002104	4.81444622	4.431653484	5.106006281	6.620033843	9.145371956	13.17007704	19.38566662	28.70710964	42.70300664	64.14631813	97.19015189	147.4442792	222.8427244	334.6910877	496.0257148	716.0386253	993.3798025	1309.16125	1620.880674	1876.077866	2050.07547
CdI2_mp-567567	16.90798964	10.07351916	6.478720387	5.374914938	5.759106636	7.054814703	8.985012706	11.75983155	16.17527086	23.38139074	34.69877334	51.8880977	77.88963147	117.5424994	178.136622	270.2575989	408.0710695	606.3467578	873.9497593	1207.86426	1586.455585	1958.828602	2255.022786	2436.858832
GeI2_mp-567677	18.20239226	10.15075637	6.238655575	5.150553999	5.644367728	7.126513774	9.299410343	12.3186721	16.9444257	24.33141239	35.88502114	53.58319616	80.66973758	122.2626493	185.9031286	282.5899667	427.277629	635.7860391	917.5554908	1268.146188	1660.965077	2038.788649	2332.589203	2515.906657
Be3P2_mp-567841	19.38802518	10.82423694	6.18161507	4.659895854	4.607670139	5.345284031	6.733662431	9.022937051	12.75483699	18.66232896	27.79399969	41.96284604	64.0955318	98.14091897	149.1717331	224.6425392	335.6063383	494.9733019	712.5997713	989.2908237	1307.960477	1627.023488	1901.974255	2122.708434
Ca3N2_mp-568172	13.72060564	7.891577278	4.850488132	4.067689848	4.604613921	6.085843101	8.385098533	11.68389986	16.62466371	24.25958269	36.13461545	54.78009273	84.22284586	130.0215837	199.3204968	302.1766645	453.1868435	669.6900059	965.3268896	1341.198073	1773.058749	2200.694771	2553.975344	2809.392896
BiI_mp-568388	13.41114233	7.824653493	5.064684282	4.442887847	4.917776634	5.941447091	7.353884572	9.495296803	13.08403962	18.97517787	28.08918297	41.72699848	62.16371986	93.18373978	140.6356244	213.0881689	321.4314622	476.1752549	684.1014284	945.3116398	1243.986403	1536.957523	1775.204693	1951.751514
MgH2_mp-568441	25.86092202	12.05098234	5.732078433	3.720395373	3.499458108	4.249681097	5.809834175	8.303401995	12.09561427	17.75284646	26.10829323	38.61312816	57.65968422	86.52347707	129.3945872	192.4870816	285.485281	420.3117161	605.8044569	841.2525131	1111.627399	1386.238786	1631.664624	1837.874328
In5Br7_mp-568546	18.22088135	10.12701709	6.129835544	4.988340693	5.415305543	6.815449047	8.911418931	11.85348147	16.35304234	23.50135961	34.66375574	51.81521353	78.17791545	118.7141766	180.5689396	274.0714311	413.3265154	613.4278378	883.727348	1220.680281	1599.582302	1966.426176	2256.732277	2446.967411
TlBr_mp-568560	19.02065981	10.63812874	6.612500632	5.387862379	5.652106289	6.684485923	8.129419196	10.17941061	13.59487264	19.46473784	29.06577019	44.01588107	66.76992355	101.2050829	153.1931134	231.4653624	347.9401318	515.2050668	741.0314964	1023.412932	1345.140376	1665.611894	1930.401308	2113.480155
Re4Si7_mp-568595	12.24424705	8.057023767	5.292023496	4.270228235	4.205423781	4.76284267	6.026985999	8.375482391	12.28997948	18.18093376	26.6181286	39.02675803	58.07383092	87.5164202	132.4434724	200.6347772	303.3126029	452.246211	654.1043021	906.4713625	1193.32403	1478.853769	1719.999101	1891.433045
In4Br7_mp-568692	17.74579412	9.849863062	5.997581296	4.902208286	5.381433856	6.912904988	9.251503087	12.52632775	17.43118189	25.0719828	36.85268305	54.84154989	82.46217346	125.0035087	190.0706435	288.7238692	436.3196097	649.5344776	938.4048169	1297.848993	1699.963652	2087.190359	2390.303746	2580.377094
BiBr_mp-568758	14.83185054	8.532957059	5.35573501	4.530286103	4.871391306	5.811492443	7.213156865	9.404824821	13.05809304	18.97112384	28.03303858	41.58857969	62.01453045	93.15841994	140.8270966	213.5090624	322.1232241	477.2872656	685.5666318	946.1631411	1242.277421	1531.226731	1766.14374	1940.753814
AgTe_mp-568761	10.20808611	7.218551277	5.265053871	4.808401056	5.294070947	6.421406055	8.290460133	11.4210337	16.58435535	24.59170293	36.47852632	54.29256212	81.76605723	124.4186315	189.933807	289.5620677	438.5231831	652.1275701	939.2884289	1297.268545	1701.109716	2090.159314	2392.042925	2574.412276
Si3N4_mp-568867	25.65586246	14.61062461	7.80209693	5.152220366	4.630470722	5.272390759	6.83044993	9.45831701	13.6184957	19.96971421	29.39924157	43.48736892	65.08779888	98.49073756	149.4515842	226.0883433	340.1228953	505.2443961	730.7904944	1014.203962	1334.839415	1649.080934	1901.780336	2062.726015
TlBr_mp-568949	19.7974263	11.11392391	6.886993055	5.540766449	5.715644862	6.657782019	8.007627771	9.957845194	13.25076002	18.94394724	28.27703451	42.82075082	64.96093964	98.46709808	149.0359554	225.1229029	338.2740162	500.679355	719.7927466	993.590366	1305.726205	1617.723908	1877.056312	2057.085153
P4Se3_mp-569094	20.78419234	11.17928244	6.371833218	4.888252247	5.171487849	6.621789701	9.04444636	12.55653057	17.72696405	25.51237979	37.27237117	55.24586268	83.18040511	126.580126	192.904429	292.8064061	441.5154774	656.3320318	948.3088557	1312.393885	1718.850882	2108.393351	2413.582394	2608.790856
SbI3_mp-569224	19.02543687	10.71064877	6.69248658	5.578794824	6.091271831	7.564142325	9.642937262	12.50549986	16.98552334	24.31492611	35.9553946	53.88349563	81.29649515	123.3208959	187.6594154	285.6066576	432.3778712	643.7881225	928.9188517	1282.824829	1678.365626	2057.091449	2347.623276	2522.085502
MnP4_mp-569522	12.91677805	8.120542085	5.18926227	4.257809398	4.434014607	5.333785467	6.993484611	9.804501867	14.37992696	21.37936616	31.67259013	47.01948657	70.61962374	107.1437493	163.0309232	247.8670862	375.2095786	559.5864459	810.0016594	1123.403176	1475.808586	1815.42291	2087.275188	2273.898322
Ca2Bi_mp-569535	9.626115323	6.420183168	4.802259831	4.708211941	5.599652824	7.164978899	9.388361097	12.64266473	17.59059212	25.15636343	36.96483509	56.0419786	86.9039921	134.6990911	205.0759354	307.0121635	455.8737803	670.8806996	966.9976576	1345.777237	1783.305147	2220.066358	2586.472789	2846.998039
PbI2_mp-569595	20.50750436	11.51341457	7.248492215	5.959777617	6.269001545	7.393576751	8.939055031	11.12846204	14.81506888	21.20567337	31.69435427	48.01676278	72.82482613	110.4204455	167.4659477	253.9327722	383.3505605	569.7563968	821.1512074	1133.661326	1485.799603	1829.950248	2103.35854	2276.018982
TlCl_mp-569639	20.56587349	11.55044306	7.108530524	5.630431392	5.78117317	6.838956635	8.449614573	10.75297151	14.45916691	20.65687569	30.69810206	46.41862784	70.64467115	107.6307781	163.4604914	247.0800329	371.1956134	549.8772521	791.751333	1093.392885	1434.902053	1774.056357	2053.861062	2241.816654
TiCl3_mp-569756	14.04528426	8.936492123	5.836776838	4.749664288	4.71335177	5.302768526	6.525213217	8.665295246	12.11762996	17.35547458	25.28510053	37.83102218	58.08682863	89.84510527	137.5893895	208.3141437	313.2727461	465.308251	671.577418	926.7561101	1208.469074	1476.964027	1694.146045	1845.382942
TeI_mp-569766	13.32341721	7.871922926	5.112239607	4.490463791	5.01613299	6.199478562	7.920130605	10.52059147	14.72032352	21.40351785	31.6360287	47.1260666	70.82465318	107.2988371	163.2251126	248.3562789	375.5217773	557.5288278	802.2039663	1107.463818	1450.870427	1779.501199	2037.353709	2216.590242
NbI4_mp-570044	12.30035709	7.503619987	5.003533836	4.456208704	4.993843274	6.198110181	8.021950354	10.84667743	15.37490568	22.44217946	33.12466265	49.31275798	74.27336209	112.8432587	171.8636731	261.4268153	395.2150659	587.1421647	845.4308871	1166.956465	1527.083916	1870.449303	2139.020779	2321.23764
CdI2_mp-570082	17.16568041	10.22711893	6.577750795	5.438734168	5.802686135	7.0873165	9.012765987	11.78622763	16.20205611	23.41304368	34.74760932	51.97805375	78.05664666	117.8269327	178.5672001	270.8546179	408.9075556	607.6146891	875.8590273	1210.397037	1589.438369	1962.377511	2259.257878	2440.813273
CdI2_mp-570127	17.14089533	10.21282865	6.568336491	5.432533654	5.798167051	7.083292949	9.008294684	11.78072648	16.1950297	23.40344693	34.73319421	51.95478207	78.01831878	117.7656058	178.4743934	270.7198768	408.7100148	607.3148844	875.4125585	1209.788198	1588.679807	1961.466862	2258.209714	2439.769436
AuBr_mp-570140	22.21243938	12.68409898	7.450953491	5.535112543	5.26768156	5.788148256	6.809450592	8.560428465	11.67846388	16.98603229	25.29499584	37.53578416	55.3737255	81.90000882	122.0903695	183.1742301	274.3277907	404.4749317	578.9950302	797.6003141	1049.995708	1306.673081	1524.560787	1681.468605
PrSe2_mp-570205	10.43814871	7.093128242	4.992666993	4.392587029	4.688292731	5.617999386	7.305922559	10.19671519	14.87055103	21.89817443	32.17669648	47.72954965	72.10350924	110.1164907	168.103828	255.7346021	387.2099979	577.6173668	835.1046146	1154.305386	1509.275461	1847.134766	2109.419386	2267.989335
InBr3_mp-570219	21.2965698	12.07825898	7.422351482	5.856767203	6.127947554	7.615999517	10.03309714	13.47227232	18.60209324	26.54938159	38.81313161	57.6794195	86.93950703	132.3053906	201.6927215	306.5483689	463.4243217	691.0269295	999.929061	1381.654014	1803.985389	2208.515588	2521.971185	2702.067848
CdI2_mp-570314	16.90745453	10.06956517	6.477110994	5.375040167	5.761674784	7.061701314	8.998056537	11.78029691	16.20505639	23.42455688	34.7627644	51.98527962	78.03928653	117.7727074	178.4866608	270.7854131	408.8689243	607.5519224	875.7212391	1210.322493	1589.633377	1962.656929	2259.309528	2441.29438
CuBr_mp-570354	11.94885983	8.632453726	6.122042069	5.274449674	5.462948095	6.345191586	8.029375682	11.03211351	16.09775829	23.99008198	35.68113631	53.17324366	80.19561949	122.2790442	187.0546623	285.5885134	432.7585737	643.1846551	924.1422296	1269.915097	1652.656426	2012.348505	2281.768035	2433.349659
PbCl4_mp-570355	21.29006159	11.75231017	6.906863572	5.422080977	5.763378161	7.269978261	9.672750608	13.09268459	18.19082849	26.04388504	38.11003353	56.68734134	85.60283571	130.5918878	199.5965609	303.9319747	459.3806876	683.3707581	986.6705043	1363.784309	1783.609424	2182.73088	2487.941961	2671.750255
CdI2_mp-570448	17.1974915	10.2217968	6.573913129	5.449084258	5.833148963	7.142568549	9.093007917	11.89033906	16.33613755	23.59786708	35.02707608	52.42905237	78.79661056	119.0195935	180.4338747	273.7027023	413.172822	613.8810134	884.8079363	1222.641134	1605.183145	1981.047506	2279.671033	2462.068378
CdI2_mp-570472	16.61726163	9.908278233	6.371128157	5.303263636	5.704659814	7.003194257	8.925486864	11.6866238	16.08323629	23.25755749	34.51384366	51.58922574	77.39662739	116.7531636	176.9399652	268.5144889	405.5125665	602.4768712	868.2062916	1200.017453	1576.62621	1947.021626	2241.510576	2423.404396
TcBr4_mp-570480	14.92561992	8.768757844	5.504224097	4.60482026	4.931327136	5.988027853	7.714549118	10.45978754	14.86918175	21.71210318	31.99971481	47.56670758	71.63317119	108.9799082	166.3236445	253.4980261	383.8300459	570.8350767	822.0437954	1133.068421	1478.532028	1805.35223	2060.671476	2236.628598
CdI2_mp-570610	16.93269201	10.05341312	6.476756232	5.384619918	5.789334965	7.126860822	9.120450184	11.97390199	16.48881088	23.83712579	35.37421046	52.91161744	79.46183994	119.9554572	181.7963076	275.7625504	416.3885824	618.9380622	892.5028613	1233.610834	1619.69237	1998.894258	2299.990727	2483.280868
CdI2_mp-570613	15.19053461	9.084615387	5.857487417	4.976369691	5.473712222	6.807701706	8.727396783	11.47650855	15.86253257	23.0025258	34.14258497	50.9465526	76.26414583	114.8965004	174.1894726	264.7230293	400.1696058	594.2980854	855.7307484	1183.065944	1555.918375	1921.778627	2211.588506	2395.70744
CdI2_mp-570671	17.20427107	10.23769829	6.58832705	5.449841991	5.819039525	7.116904567	9.063181615	11.86277537	16.3120933	23.57198238	34.98399566	52.33967862	78.6179587	118.6947768	179.8867565	272.8362766	411.8923548	612.1228511	882.4900256	1219.573784	1601.245158	1976.586189	2275.207441	2457.246884
CaC2_mp-570697	19.03738809	10.17741459	5.64684022	4.22259395	4.386443875	5.571554022	7.628327605	10.68802225	15.2524889	22.17432101	32.74045931	49.11589043	74.80307006	114.6432066	174.8094958	264.0518121	395.4277059	584.7144541	843.6612794	1171.251413	1544.833271	1914.581538	2222.911837	2447.908059
GaI2_mp-570738	18.544155	10.31057487	6.372953778	5.254141856	5.75055288	7.284315322	9.547923869	12.66628691	17.39496347	24.93671742	36.80130919	55.12248854	83.32199121	126.6542988	192.7119442	292.6256259	441.9577056	657.6387245	949.6799575	1312.542914	1718.020201	2108.635742	2413.999889	2602.738295
Ga3Os_mp-570844	15.24721476	8.852131344	5.403650951	4.373197944	4.546100727	5.361965184	6.697974026	8.851144645	12.43907079	18.20681025	26.98347204	40.03297402	59.59826816	89.25167366	134.2355361	202.0842968	302.5571167	445.5427147	638.1848725	882.4706358	1167.778356	1460.332644	1718.13553	1929.566417
AgCl_mp-570858	11.74980838	8.198835138	5.743940445	5.036335537	5.417449524	6.52111363	8.402325932	11.56308175	16.81330708	25.04810693	37.35816675	55.78403496	84.11019951	128.1340424	196.0319417	299.5012922	453.9001563	674.3947312	969.6022247	1335.898045	1745.852817	2135.253912	2430.904996	2606.474695
CdI2_mp-570882	17.15620747	10.22366476	6.574827607	5.436153878	5.799459201	7.081879805	9.003631607	11.77236739	16.18213066	23.38428509	34.70488145	51.91274649	77.95534588	117.6704685	178.3297678	270.4988988	408.3721248	606.8043852	874.6643027	1208.743107	1587.312358	1959.816463	2256.375663	2437.848672
TeI4_mp-570884	17.24368112	9.733930509	6.083078801	5.166918578	5.742708923	7.173127159	9.142722359	11.87814373	16.20684316	23.28143382	34.42995338	51.45969485	77.3714901	117.0837293	178.0900829	271.2769734	410.794783	610.8255885	879.8542588	1214.826616	1590.934042	1950.325687	2225.769343	2399.904256
CdI2_mp-570939	17.49927854	10.40441096	6.691220872	5.524087855	5.882617219	7.175475471	9.115146637	11.9048831	16.34410622	23.60181367	35.0359923	52.46178268	78.88125463	119.1837869	180.6846023	274.0240935	413.584066	614.5037031	885.7676935	1223.830717	1606.378051	1982.423704	2281.503744	2463.494987
YbP5_mp-571006	12.94440587	7.993951392	5.123967852	4.204432749	4.313287089	5.06690323	6.495004997	8.931502869	12.85591804	18.77753198	27.49425917	40.71910243	61.40464217	93.55014467	142.4193632	216.0971429	326.656135	487.4189789	706.5142206	980.8709658	1289.988441	1591.812712	1842.350931	2024.928985
CsI4_mp-571011	12.33272992	7.259481397	4.89270337	4.544846817	5.491456615	7.29704674	9.632826617	12.68067721	17.33707338	24.93791883	37.10554286	56.0554085	85.27330207	130.1950602	198.8909533	303.0992538	458.43988	681.3016198	982.7272965	1361.503764	1791.669696	2208.380207	2533.305948	2742.419465
TlCl_mp-571079	21.27534451	11.98708323	7.366436794	5.774433627	5.845090061	6.827721376	8.361202051	10.58383833	14.19212069	20.25112852	30.08432151	45.49099408	69.24469256	105.5167984	160.2508181	242.1725598	363.7077186	538.6452382	775.3658179	1070.362749	1404.372446	1736.961313	2012.719017	2198.456675
FeCl2_mp-571096	15.23956714	9.724448024	6.281530114	5.179382435	5.364764577	6.324961624	8.025229092	10.85711972	15.50764811	22.80913859	33.91176878	50.9405222	77.56878986	119.0669963	182.5219367	278.1375896	419.9811211	622.7438688	894.9671354	1232.027254	1605.816041	1957.259254	2225.781187	2396.733832
TlI_mp-571102	18.75551804	10.51176823	6.68670689	5.554765382	5.846443	6.814836696	8.084903946	9.893610007	13.06019713	18.72476163	28.20955245	43.10684214	65.72624912	99.76084913	150.9856212	228.1414959	343.1498506	508.4696611	731.6403794	1010.661258	1329.052772	1647.342712	1910.984115	2092.495789
FeI2_mp-571122	12.48702281	8.046816147	5.507774411	4.899163611	5.393600511	6.559441542	8.371424192	11.24981629	15.92933525	23.28571358	34.49009802	51.63817679	78.31472827	119.7000538	182.9111218	278.31625	420.0262367	622.4471408	894.0181754	1231.23501	1608.034345	1965.918514	2242.399197	2421.32092
CdI2_mp-571136	17.17839089	10.23087146	6.58131452	5.442320884	5.807793906	7.096436814	9.028258341	11.80972877	16.23581436	23.46177388	34.82006047	52.08888382	78.22868325	118.0928963	178.9714606	271.4614503	409.8214499	608.9955115	877.8909998	1213.209449	1593.056504	1966.732784	2264.149243	2445.851689
ZnTe_mp-571195	13.20203311	8.410670959	5.558895915	4.786413831	5.215054503	6.361691888	8.124718438	10.88287564	15.42912099	22.73958784	33.91831366	50.66694447	76.06177833	115.1065368	175.1810944	266.7036612	402.829406	596.5011033	856.3862544	1182.950037	1556.960966	1924.301725	2218.522107	2418.020608
CdI2_mp-571197	17.1712737	10.23137343	6.580164616	5.440023266	5.802983156	7.086249328	9.009868033	11.78113679	16.19423708	23.40145653	34.73049832	51.95261808	78.01846495	117.7692512	178.4799541	270.7223625	408.7060032	607.3087402	875.4078906	1209.767424	1588.618466	1961.386423	2258.148711	2439.659021
CdI2_mp-571225	17.53017643	10.41711297	6.701138311	5.532648354	5.892700457	7.191023885	9.139729223	11.94098031	16.39517428	23.67519233	35.14549861	52.63076609	79.14606356	119.5960368	181.3130643	274.9668188	415.0003487	616.6386149	888.9028585	1228.158214	1611.92764	1989.090462	2288.987221	2471.191729
ZrI4_mp-571235	16.1494496	9.133233453	5.762635462	4.931766104	5.564102968	7.118549568	9.298299673	12.28454354	16.88829181	24.30744886	35.96075777	53.79078074	80.9795466	122.645173	186.4803674	283.7204983	429.3621987	638.9560445	921.954851	1274.884811	1671.909298	2054.300586	2351.176984	2537.943211
GeBr4_mp-571246	22.27522085	12.5785031	7.799272399	6.201911116	6.592541276	8.421149348	11.43527964	15.68709979	21.81949136	31.03449675	45.05892912	66.67170682	100.4989358	153.3299658	234.2548448	356.3426617	539.1223147	805.4469298	1168.016186	1614.248555	2102.055592	2561.756511	2908.743546	3091.870749
ZrI2_mp-571279	11.93049792	7.592339562	5.205551314	4.649869167	5.12621887	6.247799586	8.023301816	10.86046743	15.42303419	22.48716912	33.16424374	49.54612558	75.13750298	114.7639355	174.8643117	265.0753158	399.1296375	591.515813	850.7818444	1173.277915	1533.878953	1878.020219	2147.860192	2326.102226
SiC_mp-571286	23.73154523	13.1274097	6.967033205	4.739962187	4.392040333	5.053225237	6.522530194	9.000386066	13.00487276	19.23927302	28.59815556	42.5981527	63.94739976	96.76364075	146.7101049	221.8234216	333.3292478	493.8675916	712.3501978	987.8140781	1301.732382	1611.061044	1864.216157	2040.569061
AgN3_mp-571297	27.05688212	15.68801218	8.375332868	5.510322685	4.79654452	5.138893732	6.251041456	8.329021165	11.89709303	17.62752309	26.27222267	39.03095558	58.17464122	87.39754242	131.9877217	199.3363529	299.1712231	441.723073	633.8671804	875.1525849	1151.274663	1425.605928	1650.917059	1805.916021
La4Pb3_mp-571336	9.534521068	6.343235685	4.683946995	4.512274074	5.255127199	6.590894097	8.542468459	11.55231431	16.3417309	23.78102207	35.1559816	52.80173553	80.3869077	122.572431	185.2493492	277.5610847	413.4765955	609.1643406	877.2403952	1220.945484	1622.513786	2028.301386	2368.932856	2607.746361
Rb2In3_mp-571505	8.657662962	5.775755373	4.457839895	4.60353971	5.789600655	7.740393213	10.3969334	14.11193166	19.61287666	27.9813306	41.126097	62.52117961	97.24378742	150.9252129	229.5591762	342.8142603	507.7573617	746.4001631	1076.984557	1503.491524	2000.876178	2502.131041	2926.811994	3232.614889
CdI2_mp-571519	17.15364064	10.22174999	6.573719625	5.435557057	5.799303592	7.082299439	9.004796686	11.77441076	16.18526302	23.38892445	34.7117357	51.92294489	77.97066991	117.6936462	178.3648926	270.5522583	408.4534869	606.927669	874.8457171	1208.99626	1587.642367	1960.2151	2256.82084	2438.312712
InCl_mp-571555	15.86249193	8.784119007	5.289182468	4.370728345	4.868768492	6.303466099	8.490731584	11.61886147	16.36740591	23.75158728	35.0663183	52.29492536	78.75884824	119.5441295	181.9069806	276.2774258	416.8088876	618.7089565	892.1129532	1235.049042	1623.11273	1999.94202	2301.066311	2508.392984
CdI2_mp-571567	17.18433984	10.16825286	6.55367401	5.452190487	5.868574504	7.235643573	9.269435581	12.16852166	16.74298411	24.18941756	35.9050244	53.76195688	80.8481681	122.175156	185.2326958	280.9390165	424.1101175	630.3982134	909.0762472	1256.289266	1648.631538	2033.342685	2338.198343	2522.586068
CdI2_mp-571579	16.96462401	10.06667272	6.486711963	5.393438799	5.800042738	7.143269836	9.145824142	12.01041271	16.53971756	23.90974095	35.48263715	53.07987548	79.72714338	120.3702567	182.4301818	276.7141016	417.8161161	621.0828856	895.6425797	1237.938366	1625.239247	2005.545647	2307.43429	2490.932992
CdI2_mp-571613	16.93710226	10.08109373	6.486126411	5.382893153	5.771347559	7.077430608	9.023666132	11.81830277	16.25888728	23.50167402	34.8773651	52.16137486	78.31412957	118.1990825	179.1350651	271.7570917	410.329544	609.7573742	878.9664043	1214.810208	1595.398913	1969.594783	2267.104676	2449.307449
CdI2_mp-571616	17.25070827	10.22501943	6.585016383	5.466259935	5.865441845	7.207825555	9.208673573	12.06869884	16.59439187	23.97188847	35.58278184	53.27641679	80.10735979	121.0419562	183.5087817	278.327242	420.1479066	624.4180168	900.3036846	1244.100962	1632.827013	2014.31657	2316.977206	2500.544799
CdI2_mp-571646	16.90191313	10.07004961	6.476456727	5.373403231	5.757961526	7.05374899	8.983813853	11.75838099	16.17346027	23.37895538	34.69511894	51.88214994	77.87975575	117.5266124	178.1124752	270.2224104	408.0194853	606.2688961	873.8344525	1207.707101	1586.259258	1958.593286	2254.753641	2436.590754
CdI2_mp-571654	16.93820535	10.08643913	6.488712793	5.382754162	5.767638223	7.068244833	9.007349853	11.79376905	16.2240378	23.4516123	34.802835	52.04681323	78.13538869	117.9212859	178.7095976	271.1131326	409.3578176	608.2998251	876.8395876	1211.86814	1591.598333	1965.033593	2262.028434	2444.043094
CdI2_mp-571667	17.17128917	10.20808107	6.572470034	5.442967445	5.821312117	7.132879495	9.097930892	11.9201133	16.39779447	23.69774119	35.17034546	52.62006751	79.04487093	119.3464701	180.8761961	274.3330461	414.1632592	615.557091	887.5387173	1226.593088	1610.346498	1987.557631	2287.473647	2469.974497
B2S3_mp-572670	20.01386587	10.92633983	6.142401305	4.549441852	4.712955714	6.105764951	8.63518636	12.42653076	17.91994464	25.90609431	37.66715328	55.53667845	83.47585573	127.099821	193.6322348	293.3147719	441.6030222	657.2310989	952.8373605	1323.175344	1737.465381	2137.339306	2454.641431	2655.577287
ICl_mp-573495	17.60764279	9.663878034	5.811721397	4.836428259	5.357167927	6.789374438	8.92499721	12.00662818	16.75886449	24.19647451	35.62979119	53.1535926	80.31242	122.5103524	187.4647898	286.2476911	433.5790136	644.5947149	928.3774039	1280.575656	1671.67545	2038.602651	2317.578378	2501.964283
Cs2Te_mp-573763	6.123026096	3.915985604	3.077851158	3.427618275	4.872878483	7.228687771	10.03998542	13.31731398	18.05663256	25.95656974	39.29037765	61.21208233	96.17733949	150.1904021	231.276612	351.0724477	526.3018788	776.8774245	1120.270439	1563.378758	2085.607503	2617.708298	3065.912272	3391.630586
Cs3As11_mp-573812	13.03532337	7.373666635	4.700797717	4.188117627	4.944168363	6.557201594	8.809626743	11.89796129	16.57957459	23.99623521	35.63822446	53.73362818	81.80063829	124.9706246	190.3982184	288.4150117	433.2196093	640.4021664	921.4171129	1276.73036	1683.439463	2083.480769	2411.00276	2651.417733
Cs4Pb9_mp-574070	8.067015429	5.217390544	3.981240426	4.187647654	5.395843924	7.143551434	9.105937043	11.62568197	15.67409321	22.5260673	33.7266954	51.37917592	78.55066631	119.6024718	180.7717589	271.3173483	403.8910906	592.5801165	850.0831134	1183.702477	1580.685851	1988.335826	2337.411884	2607.866874
SeN_mp-574424	27.91733366	14.86798429	7.906732475	5.487470607	5.199525315	6.043368895	7.727816236	10.40326645	14.60994961	21.13752699	31.01406091	45.92196221	68.78521951	104.0469979	157.8634518	238.9738673	359.4702957	532.6073616	766.7483448	1058.551554	1385.825864	1701.990903	1953.543387	2121.628726
P4S9_mp-579224	19.7894865	11.16080322	6.618826018	5.109034004	5.452676728	7.212327416	10.2963866	14.76941103	21.05334538	30.045485	43.29647285	63.63815298	95.83778825	146.6029884	224.4292612	341.2378585	515.2482217	768.7536777	1115.911344	1547.524601	2024.009497	2476.397182	2824.012803	3022.117828
CdI2_mp-582042	16.90046214	10.03384052	6.464071869	5.376503972	5.783995492	7.123261799	9.117848568	11.97185296	16.48712094	23.83541089	35.37135191	52.90538728	79.44891581	119.9324285	181.7618606	275.7174913	416.3287634	618.8463944	892.3614241	1233.429773	1619.496865	1998.664004	2299.697388	2483.035161
Bi6Cl7_mp-582968	19.59897625	10.9538139	6.493850914	5.127465682	5.285690652	6.221014948	7.666282292	9.860678455	13.49054664	19.45998329	28.77850063	42.83619693	64.02452684	96.31699304	145.7500584	221.003322	333.1965465	493.3595325	708.4069167	977.3145305	1283.055211	1582.50998	1824.107182	1994.275398
CuO2_mp-600604	19.19979189	11.361863	6.668147051	4.810111567	4.274212329	4.431515041	5.198923121	6.765201944	9.405477397	13.42605352	19.42203911	28.74579786	43.65686122	67.03617011	102.4584998	155.5103208	234.9337594	350.4852224	507.5443305	702.6578651	921.1503086	1136.840277	1324.190091	1472.322686
CuP10_mp-606644	18.32356716	10.34565259	6.005405281	4.639807405	4.744970766	5.706328097	7.413164001	10.1569909	14.55826399	21.41807686	31.79515635	47.53385154	71.83032021	109.4039939	166.7507032	253.2214574	381.6986898	566.0692603	815.5504884	1128.19312	1480.945494	1822.07763	2097.191693	2295.184165
In3Ru_mp-607450	11.52103243	7.364992072	5.058555066	4.519525124	4.988342983	6.104988004	7.897281509	10.78227858	15.42143201	22.55978858	33.22830463	49.38515125	74.33932053	112.6460078	170.3975804	256.778926	384.994886	569.3692129	819.7156109	1136.357217	1501.190225	1866.919799	2176.811983	2405.700692
NO2_mp-608071	34.12780935	17.1757456	8.462095361	5.440323686	4.681560531	4.923276767	5.869716373	7.691030814	10.80838765	15.75779063	23.26397589	34.6464833	52.20689766	79.28617594	120.4258686	182.2334963	273.9350254	405.3339573	582.2143625	801.6048559	1046.262397	1282.287217	1478.387033	1633.870735
Gd2S3_mp-608146	12.51114329	8.35790091	5.712518395	4.941297783	5.253262366	6.234537261	7.900759396	10.68770811	15.30592752	22.56461108	33.51556289	50.10369496	75.75946508	115.5023247	176.2385649	267.9919629	404.3724334	599.3145001	861.2225593	1187.592213	1555.052889	1908.812261	2187.282899	2369.258063
Fe3O4_mp-612405	14.53392307	10.10049107	6.553798494	5.06766274	4.780964793	5.243281935	6.50308136	8.985053474	13.31242612	20.08082559	29.95227018	44.37187675	66.2196662	99.90346179	151.6350456	230.5611859	349.1059697	519.6053986	748.1798736	1029.765974	1341.346129	1635.372334	1860.143502	1995.475235
Rh2O3_mp-613620	19.28918093	12.89767631	7.855610155	5.663661782	5.003970532	5.179899243	6.125064803	8.19174657	11.96269474	18.02738362	26.95896518	39.87624153	59.14290714	88.63831589	134.0090086	203.3119303	306.7791277	453.8584787	649.0425701	889.1871056	1157.606512	1416.08317	1620.715346	1755.236928
WO3_mp-619461	34.07909347	18.52700319	9.420128896	5.994293957	5.000079077	5.059710507	5.812801303	7.426842817	10.3664087	15.20844507	22.57100392	33.41360884	49.57545764	74.12365419	111.5723755	168.2628433	252.2149219	371.2173017	529.8977399	727.2732411	951.5416192	1173.499123	1359.101914	1499.759803
ClF3_mp-619575	43.12476164	24.34942805	12.6066521	7.854800109	6.611088545	7.109987277	8.800444533	11.74268457	16.39744488	23.47837802	34.01813398	49.9266531	74.64983111	113.3181476	172.6924224	262.1560816	395.2619764	587.6828531	848.7807103	1171.578318	1526.682598	1860.008567	2107.221421	2234.948282
CdI2_mp-624399	17.00794333	10.13977799	6.519112408	5.399157515	5.771627472	7.055039083	8.971030313	11.72982504	16.12584301	23.30623226	34.58837324	51.72828277	77.65753737	117.1997108	177.6184264	269.4589336	406.8360182	604.4698714	871.1889716	1203.977754	1581.318027	1952.601891	2248.110604	2429.552403
Cs5Sb8_mp-628742	8.118350673	5.332277303	4.101948503	4.348678256	5.715098557	7.881482053	10.62184468	14.26036424	19.75891583	28.50555935	42.45596778	64.70626593	99.89644562	154.0582311	234.9174661	353.9447652	528.0620919	777.0741108	1117.399295	1553.492905	2059.450342	2560.347223	2968.323455	3256.898037
HCl_mp-634101	25.95256376	13.72267218	7.415549367	5.111229922	4.954550622	6.208495355	8.737274494	12.6257718	18.19567363	26.09176928	37.48840825	54.64183879	81.34110896	122.6855528	184.8131957	276.5406157	412.3699431	610.9505271	884.3376058	1224.593184	1600.258141	1961.727459	2252.8394	2440.06119
HBr_mp-634105	30.66952779	14.08895427	6.75310456	4.490071677	4.211496355	4.901134698	6.312286092	8.595421071	12.2032344	17.75489922	26.03717744	38.3589146	56.98984095	85.33925956	128.1979489	192.598862	288.3986731	426.3590284	613.4854537	847.9753956	1113.506515	1376.079489	1601.945715	1789.23594
CaO2_mp-634859	23.39145729	14.04100182	8.099729848	5.608154911	5.16960821	5.963628956	7.714574484	10.49283405	14.71273519	21.10579554	30.81736965	45.87852751	69.72257755	107.1665423	164.1656445	248.9005798	373.9927536	555.2815522	803.6754925	1115.155439	1466.192214	1812.10725	2093.609879	2268.989416
Ga3Fe_mp-636368	12.4267997	7.864007479	5.221019956	4.516694602	4.914461907	6.012104483	7.794418491	10.64827368	15.25902271	22.44549547	33.29104537	49.73466363	75.08098565	114.0326452	172.9538719	261.1793759	391.788514	578.9435669	832.6061574	1153.232458	1521.828866	1889.173163	2198.078524	2428.082321
HgN3_mp-636839	29.94791931	16.64532964	8.795918386	5.729127004	4.979504046	5.369779494	6.544665182	8.630592317	12.10226546	17.61123214	25.90338181	38.13039986	56.40746129	84.12646685	126.1069069	189.1936842	282.7760642	417.0901116	598.7419688	826.3309804	1086.28789	1347.102165	1566.00761	1718.981081
CrF5_mp-639662	33.50188626	18.19594997	9.131011253	5.76626153	4.892371663	5.175625129	6.299584775	8.473482222	12.21595378	18.14648571	26.94331878	39.80021024	59.09462016	88.73332541	134.381142	204.0617488	308.2825182	457.6892021	658.3928454	907.1601279	1184.493907	1448.622428	1654.030111	1789.047271
SiO2_mp-640917	23.59178936	13.31597441	7.319603036	5.11010557	4.606625544	4.952917214	5.998844389	7.999032527	11.42810049	16.83691845	24.95161973	37.15910306	55.93342121	84.86916692	128.8797663	195.2114484	294.0333031	436.0620908	627.4650653	864.8795194	1129.421926	1383.35373	1590.121008	1743.941534
As2S3_mp-641	20.08662455	11.00513342	6.326622017	4.854860331	5.128055114	6.577516289	9.038528129	12.649589	17.97721194	25.94747839	37.86578552	55.92741821	83.90068514	127.4208898	194.2090151	295.276129	446.2261866	664.6222945	961.46079	1331.18712	1743.160365	2136.56801	2441.449723	2629.582103
ReF7_mp-643265	47.99505652	26.05253499	12.6371512	7.421420846	5.820041099	5.763436152	6.64311701	8.534211407	11.88072984	17.27904281	25.41072994	37.40557832	55.44353131	83.08670802	125.4287569	189.5851342	284.9325171	421.1343189	603.6823774	829.4525721	1081.588316	1324.108115	1513.97087	1634.137168
MnO2_mp-644514	17.33078	11.39171114	6.966591552	5.131880412	4.68859194	5.039922109	6.159517603	8.413330606	12.38185666	18.64910207	27.85292034	41.30223332	61.60326198	92.80660966	140.6696999	213.6206181	323.005202	480.1020666	690.7498261	950.8214552	1239.657146	1513.911067	1727.099047	1863.707081
C20Cl3_mp-646122	32.32049362	16.88201328	8.436093858	5.441656493	4.756465461	5.142680482	6.292160429	8.381867611	11.90420888	17.52446461	26.10217579	39.0813957	58.9635209	89.45234844	135.5894685	204.5662531	306.3919564	452.0957299	649.1397577	896.0759531	1175.397147	1448.289503	1673.065959	1840.342591
C28Cl5_mp-647192	31.69042169	16.62828866	8.366424402	5.434977496	4.764308209	5.143431722	6.275218074	8.344958245	11.84841925	17.44804175	25.99743025	38.93511087	58.75546671	89.15198846	135.1617449	203.9809227	305.5982982	450.9541034	647.3969629	893.4449487	1171.60825	1443.131725	1666.814885	1834.076406
PBr7_mp-647343	19.11920254	10.57038331	6.236220589	5.006670211	5.334759432	6.565727883	8.506034394	11.42109049	16.01214362	23.22359487	34.24605819	51.00265416	76.8219471	116.8492562	178.466892	272.2251088	412.0127354	611.8926688	880.0312442	1212.068787	1580.476235	1926.538536	2190.422815	2364.945739
Na2S_mp-648	9.380342577	5.523298474	3.61502948	3.217929638	3.943977389	5.742985083	8.595464292	12.50320152	17.88101822	25.77063168	37.99764579	57.66141377	89.58759555	140.0777396	216.5079207	329.0301262	493.9455698	732.732882	1062.599872	1483.533003	1968.293785	2457.00784	2873.173589	3171.770297
TeI4_mp-651155	17.01407416	9.632927714	6.026609256	5.125112403	5.694991891	7.102264392	9.040167176	11.74392346	16.03660087	23.05383565	34.09880009	50.94899	76.56962559	115.8331519	176.1698058	268.3571511	406.3432279	604.0410691	869.8091792	1200.829919	1572.792026	1928.426605	2201.406415	2375.364861
Na3As_mp-655	11.00150923	7.352458154	5.465481115	5.256743349	6.067942925	7.47816555	9.379505924	12.05422332	16.08285117	22.39390017	32.74879558	50.37269079	79.86508472	125.8604391	192.3563414	285.9822103	420.3647808	614.5664154	885.0834964	1236.112439	1648.553073	2072.866596	2451.481492	2751.719706
PtI4_mp-669496	13.19560721	8.005271526	5.219279407	4.514656494	4.913673692	5.928147804	7.478566077	9.941665672	14.02730588	20.5479769	30.39304908	44.9892467	66.98297972	100.7165972	152.7395485	232.5649674	352.3029946	523.4806285	752.79432	1038.605872	1361.570708	1673.459478	1920.515804	2092.156382
CdI2_mp-680055	17.00238264	10.13534618	6.516528774	5.397869729	5.771531309	7.056480789	8.974392816	11.73539206	16.13414081	23.31838987	34.60638555	51.75539842	77.69884505	117.2628576	177.7146783	269.6053132	407.0585672	604.8053191	871.6801359	1204.661146	1582.207306	1953.673123	2249.302968	2430.796035
ZnS_mp-680085	16.23245769	10.14579919	6.184579266	4.744466356	4.806762976	5.844086794	7.743878573	10.77297663	15.58443298	23.04994317	34.20004395	50.71782437	75.74621543	114.3554538	173.7679655	264.0481074	398.5533532	591.6067764	852.9912479	1181.992872	1558.442111	1930.467964	2227.596015	2411.511062
ZnS_mp-680087	16.60447993	10.38612317	6.321638425	4.831190804	4.868362155	5.884099183	7.754075282	10.74041989	15.49506065	22.89356103	33.97711885	50.43815331	75.41528074	113.9523831	173.2145261	263.1709072	397.0543089	589.0635254	848.9020913	1175.865966	1549.952165	1919.690383	2215.10311	2398.112357
CdI2_mp-680093	16.83505521	10.03733465	6.453724638	5.356541	5.741610766	7.031879886	8.951287677	11.71201173	16.10928557	23.28810012	34.56007354	51.672861	77.54983183	117.0118268	177.3303805	269.0571194	406.2755827	603.6335352	869.9481471	1202.34307	1579.398497	1950.336704	2245.440027	2427.071251
CdI2_mp-680095	16.82140189	10.03266724	6.44958413	5.353132354	5.73738174	7.024075566	8.937173841	11.68976315	16.07678067	23.24106546	34.49065371	51.56797909	77.38909268	116.7659518	176.9597493	268.5034993	405.4404677	602.3613004	868.0593115	1199.717524	1576.015028	1946.24344	2240.811071	2422.317385
CdI2_mp-680111	17.03946344	10.15799676	6.530882536	5.406975748	5.777432719	7.060117131	8.976252069	11.73564319	16.1326439	23.31506157	34.60174257	51.75084602	77.69633901	117.2634467	177.7158069	269.5999086	407.0406455	604.7771919	871.6428447	1204.591569	1582.075891	1953.506068	2249.148002	2430.575887
CdI2_mp-680112	16.82450861	10.03093255	6.449530966	5.353983406	5.740074785	7.030875125	8.950375531	11.71092683	16.10791912	23.28629796	34.55745786	51.66872055	77.54308881	117.0013224	177.3155701	269.0377734	406.2484584	603.5888541	869.8751683	1202.243114	1579.27974	1950.189101	2245.253827	2426.901497
CdI2_mp-680113	16.78419628	10.00633915	6.434312039	5.344036437	5.733205203	7.026522181	8.948683072	11.71224944	16.11276997	23.29509239	34.56991492	51.68359271	77.5588528	117.0180815	177.3381016	269.0775771	406.3211859	603.7095139	870.0625404	1202.531113	1579.69963	1950.719933	2245.842052	2427.568456
CdI2_mp-680115	16.98170107	10.12274945	6.508602323	5.392781067	5.768140583	7.054331094	8.97331647	11.73537807	16.13531343	23.32081937	34.60977551	51.75891849	77.7013573	117.2637664	177.7154342	269.6100487	407.0714768	604.8271038	871.712455	1204.717443	1582.303614	1953.796771	2249.428591	2430.957805
CdI2_mp-680116	16.84466147	10.04289564	6.45722788	5.358925167	5.743458352	7.033473087	8.952734298	11.71332314	16.11048724	23.28941415	34.56215976	51.67700437	77.5579348	117.0261018	177.3528154	269.0895796	406.3216519	603.7004947	870.0441133	1202.469562	1579.550733	1950.514118	2245.640047	2427.264592
CdI2_mp-680146	16.85543133	10.05117539	6.461904842	5.361519029	5.744199938	7.031526413	8.9470585	11.70313644	16.09471982	23.26602728	34.52773599	51.62610901	77.48196341	116.9118634	177.180604	268.8289291	405.9239231	603.0944357	869.1468423	1201.21457	1577.91464	1948.531924	2243.414642	2424.949089
CdI2_mp-680148	16.77994778	10.00758336	6.434179156	5.342871346	5.729986898	7.019086813	8.934950804	11.69084049	16.08174099	23.25027171	34.50357217	51.58283509	77.40361064	116.7793456	176.9757756	268.5326763	405.4982884	602.4641984	868.2275802	1199.98379	1576.409346	1946.751621	2241.38695	2422.967948
K4Pb9_mp-680443	8.941415992	5.917822422	4.471494951	4.518317195	5.54916317	7.192836429	9.341331705	12.39514187	17.18117052	24.78950712	36.7764824	55.71752138	85.49798151	131.0372672	198.5397692	297.4833972	442.2436232	649.7724958	934.2602742	1300.720282	1730.737298	2165.711242	2532.145716	2799.455048
In4Br7_mp-680760	17.88121233	9.941009832	6.055647728	4.938482069	5.404437237	6.926005259	9.255961791	12.52175992	17.41486458	25.0395207	36.79925668	54.76249586	82.35212965	124.8510879	189.8453207	288.3661498	435.757773	648.713274	937.2517119	1296.196934	1697.671131	2084.436219	2387.349624	2576.80266
C2F_mp-683965	40.72233657	22.01104655	10.73544922	6.417403118	5.214375476	5.41788332	6.54520418	8.694583854	12.31223141	18.03412228	26.68877098	39.69891794	59.6083145	90.24493119	136.7636464	206.4077983	309.4239225	457.4290212	658.0562205	908.6569196	1190.236018	1462.952318	1679.696805	1820.324817
B4C_mp-696746	26.90411292	14.70848149	7.505471914	4.844050177	4.231906483	4.618306704	5.753340433	7.825010866	11.3219379	16.89537001	25.35142944	38.02133395	57.25487007	86.59050871	130.8735899	197.031892	294.8337808	435.4138661	627.0635179	870.1048273	1149.703021	1429.049423	1663.881492	1837.370071
SnO2_mp-697	19.71890636	11.93514663	6.928897398	4.993027339	4.54048079	4.863117942	5.873574459	7.874517017	11.37689453	16.91401498	25.07903182	37.03451355	55.05723334	82.70670412	125.077022	189.5779495	286.0250187	424.0221967	608.5962872	836.77355	1092.065701	1338.888986	1539.475469	1684.006972
Al2S3_mp-699208	16.78277021	9.051460538	5.290211612	4.28588431	4.678993216	5.964144922	8.024178231	11.0946134	15.77632859	22.94006782	33.86741457	50.79570512	77.3952065	118.7861728	181.733589	276.0500847	415.8558108	617.1566757	891.1782179	1236.025784	1625.38217	2002.134839	2309.28344	2539.037086
Sb2Te_mp-6997	10.18345013	6.298052969	4.22735468	3.710032697	4.062883851	5.029060367	6.701681244	9.466767637	13.8423931	20.33687428	29.74177157	43.83854679	65.74560796	99.73017757	151.5388737	230.1278249	348.783467	521.9151359	758.0273397	1053.510209	1385.73449	1707.206235	1966.117398	2140.311586
GeSe_mp-700	16.41811562	9.401944661	5.711886733	4.651667461	4.914935254	5.927872487	7.565612113	10.13312711	14.2840188	20.8457943	30.85998977	46.04700153	69.3531489	105.1938379	159.7950269	242.1664103	364.4209646	539.1214848	774.3780627	1068.747918	1401.883173	1725.98153	1990.180388	2185.820892
Ge3Ru2_mp-706531	13.44479535	8.94975033	5.98498351	4.99102387	5.094030298	5.861334007	7.32795223	9.924223301	14.30610959	21.16687184	31.36093364	46.54150583	69.7191139	105.3247394	159.4807322	241.1366315	362.4346318	535.678643	768.299284	1059.003154	1390.091948	1717.397146	1988.238409	2179.74899
KAs_mp-713	9.524175432	5.818451237	4.099420149	4.065091677	5.260969776	7.44973625	10.4097786	14.30089067	19.9665106	28.8386741	43.05870574	66.04618606	102.9501344	160.4542304	246.7967366	373.6953282	558.6198156	822.8115034	1184.149605	1646.450748	2180.695135	2709.16946	3143.644853	3460.411801
CrO3_mp-715566	28.90262595	15.98927503	8.354398007	5.496826443	4.924784106	5.536140981	7.04461083	9.61963449	13.76972707	20.19752475	29.8029527	44.1356576	66.00214505	99.69835952	151.1137975	228.5417465	343.5449064	509.055742	733.6156948	1014.70763	1331.803535	1640.366938	1886.559124	2046.501532
K2Te3_mp-7289	9.299459079	5.983941294	4.400877272	4.430483284	5.594782688	7.558873597	10.13241335	13.6209422	18.9044143	27.27524875	40.60961814	61.95841913	95.96365259	148.6747839	227.7193229	344.2362898	514.6816353	758.3839332	1090.956394	1515.284123	2004.248334	2484.974892	2874.930358	3151.113164
P2Pt_mp-730	19.49712145	11.73745535	6.874198868	5.073346368	4.764014802	5.192280268	6.204959266	8.091006218	11.42944319	16.89211361	25.15503657	37.23964778	55.15314139	82.34045161	123.9804373	187.3453577	281.4147172	414.7183531	592.7972258	816.4332832	1075.016741	1336.187238	1558.50865	1727.903118
NaP_mp-7440	13.20424174	7.857127687	5.118531738	4.543672689	5.231890136	6.753017323	8.948336815	12.06152136	16.79902616	24.264356	36.17358148	55.41729032	86.38309823	134.5762756	206.5003769	311.5373433	464.281523	682.8349751	982.2283471	1365.135406	1807.463042	2247.828536	2619.352175	2904.823829
RbSb_mp-7444	8.194461173	5.453964313	4.255843534	4.56642425	6.056784484	8.407980695	11.36602795	15.23087837	20.98200796	30.11016918	44.85413609	68.85237282	107.44475	167.1522652	255.6947932	384.5267894	571.5246216	838.6657486	1204.716405	1674.832565	2220.620637	2761.632306	3204.491244	3518.887873
Rb2Se3_mp-7447	10.4367952	6.605977076	4.724150037	4.606191063	5.657692305	7.505097301	9.970557178	13.36555838	18.54178858	26.74270387	39.78691874	60.66031223	93.9243807	145.5135112	222.8666021	336.8095806	503.3241091	741.0488894	1064.571593	1475.541056	1946.588292	2407.565184	2781.040815	3047.180014
La2S3_mp-7475	13.73886281	8.208022078	5.280578987	4.577440631	5.125262043	6.444420381	8.387073947	11.25338518	15.78635256	22.99864163	34.21246639	51.52927453	78.38919861	119.8049922	182.6798012	276.8926988	415.8735812	614.0897583	881.9529476	1219.76653	1605.70339	1983.976503	2291.790238	2514.307322
PtS2_mp-762	19.79063164	11.33356045	6.540980151	4.907949507	4.814741551	5.522985645	6.846379175	9.051191685	12.7597568	18.74199923	27.81122918	41.16379443	61.05264037	91.30522442	137.687408	208.376923	313.7125583	463.8427351	665.2718395	917.8349293	1207.274647	1495.017509	1733.343785	1907.133446
SiC_mp-7631	24.06137924	13.45145267	7.170576616	4.831116999	4.442189232	5.119585432	6.643145932	9.178909996	13.20867327	19.42135488	28.73660112	42.73548613	64.2068329	97.31246722	147.650383	223.1331889	335.0883062	496.6438639	717.0525864	994.8675433	1311.100657	1623.365556	1879.065758	2052.710373
As2Ru_mp-766	14.88790331	9.456429981	6.055189481	4.91532051	4.972191192	5.715583073	7.12725529	9.60298412	13.79627755	20.41817125	30.28772009	44.89467693	67.01971043	100.9604477	152.8515463	231.5568631	348.7081677	515.7386057	739.344337	1017.949031	1333.920105	1643.890771	1897.981	2079.756735
Zn3P2_mp-7846	10.48042891	7.764993777	5.637795148	4.916566027	5.120626352	6.008910242	7.746536185	10.84867472	15.98274881	23.77724857	35.14415438	52.20571352	78.86042141	120.6187687	184.8579652	282.5985051	429.5748177	642.1393579	928.727534	1282.740643	1674.556787	2043.893708	2323.098881	2477.781767
Rb2O2_mp-7895	12.91236253	7.512909347	4.751765922	4.091165738	4.725437608	6.300982671	8.63063858	11.83116555	16.55200515	23.91625454	35.55178205	54.01826224	83.3065747	128.9205465	197.9368011	300.267643	450.2849337	665.1153801	958.2489242	1330.980612	1760.529076	2189.011849	2545.357326	2801.339838
K3P_mp-7897	7.96031857	5.639280042	4.655265242	5.135457586	6.819052719	9.383148992	12.56557485	16.6000993	22.3396742	31.29442813	46.21880831	71.98943959	115.5491357	183.971	283.2314324	422.6807889	621.6146916	907.7558959	1306.209285	1823.970596	2429.341006	3038.190131	3553.465116	3927.047232
NbO2_mp-821	20.61898209	12.88326557	7.637305139	5.510885014	4.926310521	5.146322553	6.077814539	8.01979086	11.47026971	16.96900408	25.18639881	37.43833963	56.1431253	84.8555202	128.4615268	194.1254131	291.6521659	430.9038689	617.1095976	847.1319411	1104.228011	1353.086465	1556.361657	1702.632899
BaTe3_mp-8234	11.68303324	7.153838826	4.868403796	4.48308623	5.197332551	6.538870787	8.334418558	10.92002763	15.08672352	21.85793268	32.49237746	48.88250813	74.09054586	112.6840031	171.1948834	259.1156546	389.1065978	574.4402638	824.8580354	1141.878685	1506.799276	1867.058192	2161.690433	2377.181219
K2P3_mp-8262	11.88775062	7.124942661	4.778547833	4.432780817	5.355794706	7.193755929	9.770223905	13.30450705	18.55964606	26.77651534	39.88661575	61.11864719	95.38037515	148.9023772	229.1257441	346.6879377	517.8871464	762.7401296	1097.595209	1524.495298	2014.59095	2496.442603	2893.175742	3186.424858
SnF3_mp-8289	33.66142949	18.87365163	10.43272697	7.037911388	6.406290424	7.367593717	9.543136328	12.99648195	18.18813746	25.89349713	37.26084927	54.35892573	80.83064312	121.9959247	184.7700116	278.9311446	419.2512498	623.3958361	901.738081	1245.544259	1623.283272	1981.983583	2256.908107	2407.654318
TeO2_mp-8377	34.77918343	20.11452061	11.24720083	7.439530085	6.465042161	7.008901373	8.58320183	11.21863636	15.36894053	21.78489881	31.51826432	46.35340045	69.38626358	105.1589392	159.5741991	240.8877629	361.4398625	535.9244463	773.181851	1067.109602	1393.992156	1711.908596	1965.325394	2115.150878
Li2O2_mp-841	23.61765169	13.80534946	7.541866495	5.11119972	4.637219023	5.201270732	6.545127501	8.825185827	12.54433611	18.46834863	27.67578961	41.95543297	64.27558638	98.84429331	151.0545104	228.3952786	341.8305711	504.6057017	727.0256952	1009.580407	1334.737564	1659.209355	1927.417865	2111.126702
K2Se_mp-8426	6.941339733	4.214515712	3.024482908	3.077849039	4.242005912	6.582725802	9.986677047	14.370117	20.32746861	29.29233041	43.5847724	66.90606564	104.862613	164.8250611	255.734387	390.0191137	586.8044881	870.4814113	1261.289022	1761.783253	2341.091359	2922.089812	3407.362877	3750.133823
CaB6_mp-865	17.15298992	10.45853977	6.387325233	4.845195371	4.532111108	4.877748392	5.819023385	7.589984726	10.55673937	15.16783002	22.19993618	33.2138942	50.6711791	77.5328634	117.287691	175.5296952	261.5240025	386.4568154	558.3209719	776.8225489	1028.64193	1284.75424	1514.29222	1703.621106
TlN3_mp-870	28.92527716	15.2978083	8.064001645	5.483402076	5.028686997	5.614760276	6.897407587	8.995656001	12.40811655	17.86672544	26.29327408	39.09292849	58.62139855	88.43130093	133.4464168	200.6846189	299.89106	441.8170602	633.6240625	874.029217	1147.980357	1421.120873	1651.216435	1821.359519
FeSi_mp-871	8.978031369	6.816025453	5.078981422	4.557706362	4.895613754	5.91982341	7.833448223	11.19906503	16.74908922	25.15696328	37.3335043	55.39305491	83.24951032	126.426619	192.3318994	292.1505981	442.0661373	659.3300894	953.8154644	1320.478816	1730.069856	2119.941212	2417.787989	2585.237707
CdP2_mp-913	14.94172686	8.744956904	5.269851359	4.214575502	4.504936511	5.683755181	7.663573694	10.72487273	15.53832761	22.98674641	34.10863522	50.58059378	75.4813626	113.7664549	172.6234242	262.2662693	396.2108892	588.7223424	849.6247495	1178.573157	1554.846775	1925.461918	2225.125552	2429.061833
VBr2_mp-971787	17.01434794	9.852773799	6.007139727	4.904084397	5.236474692	6.408058365	8.254328047	11.06788418	15.56545947	22.70248868	33.68060377	50.41953744	76.20056911	116.0285264	176.9931599	269.1744137	405.8907098	600.880602	862.9680815	1190.136687	1558.599962	1912.660429	2191.658728	2383.320887
SmP5_mp-9849	11.81140613	7.493909015	4.92706799	4.096772576	4.213236023	4.952649943	6.376527977	8.818780942	12.71653038	18.51519779	26.99675918	39.93813126	60.36109284	92.21823695	140.5722648	213.3473854	322.786464	482.6608756	701.2092366	974.6133553	1281.527776	1580.21649	1827.010684	2001.919387
HfS2_mp-985829	18.0948219	10.10379138	5.936373888	4.681734344	4.855455987	5.810338907	7.369589214	9.797305381	13.7396941	20.03732758	29.68986231	44.23591082	66.33708679	100.158588	151.7368549	229.7288824	345.5119983	510.7602248	733.2141374	1012.308746	1330.385644	1643.336841	1901.430481	2094.366654
TiS3_mp-9920	13.73073897	8.662856431	5.629605755	4.643960662	4.755499747	5.544170798	7.023719781	9.532022957	13.57378537	19.73290527	28.97078923	43.26577965	65.90484534	101.1787942	154.5025179	234.1433003	352.6925184	524.2090165	756.9981398	1046.535304	1368.724846	1677.047688	1925.431869	2098.789246
SiC_mp-9947	24.07454386	13.47936538	7.192942843	4.842951215	4.449692401	5.128488257	6.657406114	9.198976892	13.23104934	19.44087163	28.75100501	42.75033325	64.23751278	97.37940687	147.7656166	223.2937567	335.3032315	496.978177	717.6078132	995.6829748	1312.154466	1624.71826	1880.706402	2054.12105
SnS2_mp-9984	18.16226094	10.02639491	5.85155985	4.633994623	4.934011299	6.160007775	8.138892777	11.10085945	15.70506149	22.87765472	33.79744655	50.34892961	75.76895976	115.0199714	175.1419402	266.1897978	401.6797429	595.9217614	858.2083495	1186.169233	1555.560432	1911.4814	2193.607546	2388.080878
PrN_mp-999295	16.42979325	10.30882068	6.42519443	5.088897067	5.100159026	5.835456365	7.172643874	9.450170072	13.35240246	19.71643697	29.48685475	44.11788899	66.23035134	100.0343683	151.6420046	229.6260139	344.8669879	508.2077673	727.1515368	1002.773117	1320.56334	1637.782494	1900.662259	2090.265155
FeO2_mvc-12905	23.40141817	13.81110711	7.627597677	5.271926471	4.773837551	5.235092156	6.480595906	8.799682506	12.79125487	19.16033895	28.67349228	42.63885753	63.61748435	95.79712355	145.2454763	220.5389227	332.8330651	493.4296482	709.3367291	978.7290604	1282.701086	1576.485164	1808.547721	1962.642349
BAs_mp-10044	21.0690877	11.51862124	6.345483115	4.613166287	4.471721152	5.167961525	6.532811349	8.804347672	12.53375399	18.43094852	27.36701268	40.77305433	61.16008676	92.35201727	139.7211051	210.9691523	316.5349298	467.6027594	671.9656116	929.5183751	1224.529264	1518.030083	1766.029606	1957.816211
P2S7_mp-1006118	21.29124687	11.621848	6.547176995	4.93416822	5.143066814	6.546818838	8.985283482	12.61593223	17.99995756	26.0433229	38.07285937	56.40028728	84.99518118	129.7082282	198.4194912	302.2495405	456.9441021	680.3330335	983.8759079	1362.25466	1783.363444	2182.848587	2489.191415	2677.230329
GeSe2_mp-10074	18.68319589	10.19697113	5.936854115	4.692627882	4.987463595	6.200886875	8.120885506	10.9497429	15.34649233	22.25160622	32.82632258	48.83943465	73.30359451	110.9122161	168.4346645	255.5885763	385.3897903	571.5394398	822.8562225	1137.155844	1492.028515	1836.12313	2111.227704	2302.271237
MgSe_mp-1018040	14.41738433	8.242726394	5.106418671	4.174390388	4.6395636	6.185546467	8.681662204	12.18190123	17.18656301	24.68432788	36.1956055	54.20665153	82.69691454	127.1876756	194.6954006	295.1541663	443.7005621	658.8841158	953.6399999	1324.370097	1744.257531	2159.778024	2503.155912	2734.837211
VI2_mp-1018138	14.70257442	8.715011488	5.581356381	4.813921351	5.339930385	6.610464321	8.440463604	11.14159257	15.48872366	22.50238208	33.42413601	50.13403216	75.78343364	115.2324281	175.5008194	266.6267147	401.701642	594.0312314	852.4232458	1176.059508	1543.076775	1898.525012	2180.821724	2377.633989
GaP_mp-1018275	16.62891978	9.278188424	5.50857003	4.429132154	4.692109731	5.745003888	7.469106584	10.13982342	14.37473711	20.99263881	31.09267945	46.5323135	70.40583993	107.1519095	162.8123466	246.1839527	369.5812775	546.4949018	786.3622069	1088.626645	1433.157995	1772.463479	2056.257253	2275.403146
MoSe2_mp-1018807	16.20514299	9.465204656	5.75400125	4.634882986	4.866658082	5.868898998	7.488878229	10.01670616	14.13791125	20.72824139	30.78492595	45.81516645	68.50443417	103.1962043	156.2876099	236.8818254	356.6980801	527.5281644	757.1892521	1045.524673	1375.215245	1700.551807	1967.098507	2159.674739
MoS2_mp-1018809	16.66436112	9.682886264	5.777476818	4.570407138	4.785923755	5.869323048	7.703941196	10.58342292	15.18556084	22.39311958	33.27789874	49.5872039	74.43841099	112.7080031	171.3647508	260.3090634	392.6443861	582.0428844	837.5807764	1158.042187	1521.651357	1875.59714	2159.320098	2355.585133
PdCl2_mp-1018891	13.17035518	8.188676767	5.3366443	4.610277254	5.139835233	6.546969799	8.832377639	12.40933987	18.03319745	26.59400498	39.25986785	58.28282584	87.8712963	134.6076778	207.9786198	321.6395832	493.4953864	740.8109083	1070.807029	1470.832024	1895.70405	2263.181986	2499.622453	2602.448397
Te2W_mp-1019322	16.3960472	9.536124445	5.859654957	4.743552985	4.861426796	5.546340797	6.615054619	8.369241603	11.45120232	16.62549398	24.66951231	36.60340092	54.26771103	80.88906878	121.5259416	183.430396	275.5251335	406.2333271	581.2506468	802.0157833	1058.595775	1318.612601	1540.980664	1715.779289
K2S_mp-1022	6.686197107	4.073247862	2.902639874	2.901413661	3.969781392	6.242382929	9.71282085	14.29295663	20.4356124	29.43445924	43.55684676	66.57375446	104.2909286	164.306671	255.5980157	390.4805515	588.4198759	874.8945271	1270.729101	1776.961539	2360.948809	2947.21891	3439.510965	3784.398927
TbO3_mp-1025387	17.87458853	11.21726751	6.768135942	4.949466254	4.442600574	4.654553788	5.541944418	7.382183507	10.58515052	15.55524136	22.85422919	33.74808521	50.56232812	76.59751684	116.3209023	176.4695882	266.622955	396.5729572	571.1268563	786.197126	1025.113279	1255.672618	1444.60873	1579.524403
ZnS_mp-10281	16.63297051	10.4054652	6.333263772	4.834488734	4.867068177	5.882065601	7.753839943	10.74075892	15.49029746	22.87537698	33.93760215	50.37144574	75.31492781	113.802269	172.9731444	262.7616743	396.38607	588.0721367	847.5448642	1174.064456	1547.667815	1917.149929	2212.641885	2395.603249
MgTe_mp-1039	14.01705514	7.921194067	4.971095308	4.200106607	4.777127572	6.344567978	8.69500108	11.89232733	16.55081941	23.78314594	35.15953738	53.0610409	81.19119909	124.7620867	190.6618113	288.7921847	433.775957	642.9341438	928.5253416	1288.587977	1699.067514	2107.150187	2445.805504	2681.130857
SrAs_mp-1049	10.51847136	6.886801268	4.968855276	4.654716525	5.310398863	6.618648602	8.596117309	11.6008422	16.2060885	23.18197677	33.93533451	51.192483	79.0914933	122.4069958	186.4570079	279.7166447	416.5741864	614.6790904	886.8076139	1232.201396	1626.980923	2017.462731	2343.694635	2575.735233
KC_mp-1057017	13.27477548	7.84587264	5.198942119	4.721368998	5.499285072	7.070597219	9.233930577	12.20652718	16.671116	23.73239772	35.20286956	54.17583678	85.20019503	133.5747158	205.0212388	307.9761421	456.6526205	669.5886156	962.7483665	1339.860282	1778.539367	2221.241613	2606.538952	2918.982001
K2Pt_mp-1062676	7.628501539	4.91446892	3.65063107	3.755579617	4.948316513	6.992972206	9.607430797	12.95073182	17.93236085	26.03059362	39.27381994	60.63124189	94.4561864	146.5663962	224.4569765	338.7466707	504.6908476	740.6637747	1063.538463	1481.607681	1977.848521	2489.009352	2929.748282	3265.087011
Rb2Pd_mp-1062711	5.976229559	4.109368407	3.412200522	4.027278658	6.035367232	9.409218299	13.77438147	19.17031342	26.73174677	38.51705892	57.57289757	88.70383057	139.2457171	219.1356405	341.1634934	523.3081342	791.1462692	1174.475509	1696.791941	2358.209933	3103.627164	3797.717733	4292.864524	4555.975966
NaN3_mp-1064272	23.40780355	12.39382922	6.781098069	4.954338537	4.788984464	5.456044348	6.758190052	8.905104202	12.39522332	17.92730316	26.54571422	40.07318335	61.41056394	94.39274513	143.8467471	216.849664	323.9859268	477.583698	686.6219103	950.6402716	1251.802012	1550.471161	1807.499609	2018.381404
SnS_mp-1064497	15.70401251	8.297054053	4.909993428	4.109332379	4.693600578	6.221139679	8.525583305	11.78971266	16.67968938	24.1983256	35.65015165	53.06924454	79.83748746	121.0637415	184.0310814	279.3412341	421.5416936	626.3464206	904.2543941	1253.030402	1646.757106	2027.434827	2333.139958	2553.07381
SrTe_mp-10653	10.33173502	6.715957746	4.893227274	4.782897251	5.779729441	7.467043827	9.685165098	12.80307046	17.68357437	25.51107264	37.96215446	57.76418904	89.08984968	137.4073929	209.680411	316.1076392	471.5337108	692.9156593	993.4576577	1375.280041	1814.595133	2247.140214	2599.44545	2850.172881
PbS_mp-1067933	17.92971061	9.727491769	5.939280718	4.902083139	5.370466008	6.752720498	8.734773769	11.45549416	15.66385152	22.5189036	33.44058474	50.34360409	76.19639308	115.5454809	175.0587997	264.6400269	398.1364162	590.6390736	851.6763104	1178.155322	1547.246483	1908.903491	2201.206733	2398.793087
BaSe_mp-10680	11.11293021	6.725868882	4.585724904	4.298459055	5.16974437	6.775693232	8.868065193	11.6970328	16.09552316	23.2552454	34.69599854	52.63132938	80.4885987	123.2338441	187.7892021	284.0985353	425.6509259	627.2226701	900.4833189	1248.358467	1651.733496	2054.328694	2388.326238	2635.870185
CdSe_mp-1070	12.67729117	8.368136833	5.707135398	4.979657255	5.36847111	6.437424497	8.177687357	11.03227922	15.7590141	23.22720369	34.50878095	51.51177636	77.66998405	118.2146287	180.5561691	275.3406195	416.5502267	618.0682224	888.2222945	1224.942998	1605.040007	1971.736221	2260.017466	2448.707464
GeS2_mp-1071032	18.90653396	10.38269472	5.949146975	4.608264109	4.853354016	6.091034208	8.168996474	11.30891991	16.13992124	23.56225181	34.76035772	51.69969067	77.78971026	118.2144723	180.2304515	274.1716184	414.1231003	615.2932087	887.5830473	1228.001124	1610.34221	1977.163724	2265.396511	2458.616205
HgTe_mp-1071269	12.9235726	8.38146006	5.582443669	4.687522543	4.788164654	5.441424954	6.669186454	8.883207426	12.70849574	18.78101301	27.78386776	40.98909562	60.88887413	91.49886986	138.7689796	211.3905584	320.5464034	476.8362829	686.364179	948.4176422	1247.975643	1543.974277	1785.558812	1952.550412
Be5Pt_mp-1072399	15.45545039	10.10769345	6.448145344	4.972136549	4.634730362	4.93874528	5.867128016	7.701380039	10.85163531	15.77117992	23.16906014	34.5080364	52.21258708	79.37319966	119.8190709	179.4958865	267.6657154	395.0486393	569.3534403	791.4293794	1050.488332	1318.431893	1560.4253	1755.435873
MgSe_mp-10760	14.97105519	8.547264684	5.178889216	4.208750119	4.621538004	5.986369041	8.138784091	11.21728434	15.81708394	22.91713513	33.88734318	50.902451	77.49148802	118.7405465	181.4430003	275.1991539	413.6792912	612.7019676	883.8850509	1226.803099	1619.374811	2008.867338	2330.225104	2555.791074
CoO2_mp-1077196	21.88465924	12.42211052	6.969739793	5.026329377	4.70017637	5.208141378	6.420485666	8.617582349	12.32346844	18.15073026	26.888869	40.01496524	60.19106014	91.37393764	139.0435024	211.1695593	318.6860314	472.9933124	680.8942826	939.641675	1229.960255	1510.852791	1740.564586	1910.911242
Sb2Te3_mp-1078331	11.79825394	7.328067887	4.875155893	4.196021854	4.465270394	5.334357028	6.849665334	9.381040154	13.46218257	19.66553879	28.85340727	42.80767144	64.56782767	98.25924356	149.3669389	226.3194405	341.480029	508.0943944	733.8784046	1015.406108	1331.221966	1635.874306	1880.415499	2046.381369
As2Se3_mp-1078443	16.10950881	9.37961478	5.748081405	4.655471808	4.826061213	5.709014963	7.229188936	9.715079118	13.77223224	20.12000396	29.69022687	44.15107113	66.41468939	100.7782223	153.2468783	232.6228429	350.9040979	520.4061817	748.3748908	1031.834507	1349.421765	1654.774625	1900.66596	2079.215137
SnO_mp-1078644	23.11451082	12.46671747	6.821787715	4.91734813	4.768550843	5.543599537	7.006027519	9.348644585	13.13223285	19.11007426	28.1614352	41.63979152	61.96737521	93.02927785	140.4732226	212.3617893	319.3845579	472.6728521	679.3422513	937.9739253	1231.815763	1521.323837	1759.705648	1932.355484
InSe_mp-1079260	13.93418635	8.069122069	5.142514787	4.449320552	4.932912996	6.110750992	7.87612986	10.54849931	14.7980228	21.47829566	31.71545167	47.39304519	71.61556311	108.8244855	165.1515535	249.656478	374.9317868	554.4256278	797.2432574	1102.695222	1450.462741	1791.711945	2074.510646	2289.573116
TePb_mp-1079574	14.60440211	8.459337991	5.432054373	4.692507164	5.117769565	6.054391927	7.231170477	8.945444925	11.94061045	17.14684736	25.56834573	38.43540869	57.70020476	86.65624211	130.5071614	196.8453216	295.2499921	435.1720545	623.4868472	862.3427416	1141.004211	1423.575529	1663.65756	1849.725369
Cs2S3_mp-1079600	10.49759901	6.327849383	4.339857706	4.155975573	5.220967311	7.242280535	9.9775971	13.58287543	18.89359232	27.28594521	40.70385062	62.14595817	96.21113969	149.2224055	229.4476669	348.5886367	523.2559999	772.7214547	1112.339032	1544.17394	2040.239484	2527.134884	2919.837522	3194.690083
CaO_mp-1079707	15.69669189	8.747357958	5.163108356	4.120430146	4.544161676	6.049505335	8.531824181	12.10927589	17.30899462	25.08671051	36.92347596	55.32940981	84.39067989	129.8167292	198.9358112	302.0618057	454.4632024	674.5073472	975.5766965	1355.531926	1786.425232	2208.097199	2549.955498	2782.207959
N2O3_mp-1079708	29.84906356	15.75272942	8.079246409	5.274636667	4.475107729	4.580535956	5.351059358	6.958542908	9.768677073	14.2211116	20.93778231	31.13174452	46.91785509	71.27618485	108.2013503	163.6459852	246.1398877	364.7572094	524.5893695	722.5080035	942.9659178	1156.610698	1336.967209	1482.556865
AgO_mp-1079720	11.37440696	8.44276334	5.929964515	4.872357801	4.750187382	5.303928206	6.689734327	9.385991171	13.9889259	20.97898393	30.96764188	45.58837279	68.06170547	103.0818564	157.0929371	239.7764504	364.6860313	545.2766811	787.4155286	1084.209688	1410.926862	1718.860759	1952.517346	2081.219118
GeTe_mp-1080459	13.4623318	8.234098115	5.358210728	4.518971858	4.73216413	5.564735966	7.013104449	9.421965125	13.32973029	19.35441743	28.41729188	42.31385133	64.03633197	97.60636408	148.2989915	224.1377914	336.896506	499.3408646	719.3331503	994.4612219	1305.024429	1608.13647	1858.107806	2039.800033
Tl2Se3_mp-1080677	13.64914485	8.047177543	5.169561591	4.465856398	4.896700271	5.931659302	7.422200725	9.689242629	13.42894208	19.50212221	28.90643941	43.13096128	64.69663323	97.54055549	147.4554516	222.8545589	334.7165574	494.1716381	709.0353021	980.4376251	1293.459747	1605.637802	1867.369835	2068.374312
BiSe2_mp-1095302	15.84220933	9.186785882	5.677977764	4.668750922	4.886833272	5.737089889	7.090044991	9.267904324	12.91717276	18.80757135	27.81244525	41.2922036	61.66154404	92.77406749	140.3436758	212.652791	320.3800356	473.9780473	679.9458087	937.5436655	1230.540151	1517.691506	1753.258541	1929.660068
ErS2_mp-1101873	12.97459204	8.53357313	5.695577344	4.81642003	5.047936492	5.964790074	7.580925776	10.32232057	14.88391692	22.03646738	32.73129096	48.74051648	73.29653096	111.2755935	169.5280785	257.9791702	389.894947	578.6044135	831.8772792	1146.913788	1500.924011	1841.06468	2108.387129	2283.760844
LaAs2_mp-1102055	12.47807884	7.872196542	5.318611917	4.657463699	5.032690909	6.041211437	7.685023687	10.33815134	14.60038754	21.18512731	31.16933049	46.59879039	70.80350515	108.1525599	164.241303	247.5701048	370.8011927	547.9944589	788.4613288	1090.907726	1435.106211	1774.21342	2056.237276	2261.323373
EuI2_mp-1102093	12.77413462	7.812881153	5.257777671	4.768580651	5.485737793	6.883753848	8.732548335	11.36242395	15.63858582	22.68416482	33.77759959	50.69194821	76.39408507	115.7062513	175.9111951	267.445549	403.5128266	597.0880469	856.8444747	1182.9648	1555.137609	1917.573436	2203.907326	2398.459749
FeSe2_mp-1103177	11.2431573	7.853874291	5.476985111	4.695224357	4.880108224	5.7280218	7.351176096	10.21883344	14.97872084	22.26674662	32.93689282	48.85332192	73.44134257	111.6200429	170.0774479	258.7577138	391.5729617	582.7035576	839.4670059	1156.477808	1508.077739	1840.968739	2096.59696	2250.072324
SnBr2_mp-1105170	20.74270685	11.65368983	7.0259411	5.537977352	5.807207993	7.172084022	9.341317536	12.44536255	17.16963118	24.58799072	36.05445056	53.57278543	80.49448506	122.0210447	185.6025225	282.0196594	426.2594542	634.584923	916.4124436	1265.900875	1655.507352	2030.036285	2321.39473	2497.229937
SrP2_mp-1105302	13.51598616	8.010522658	5.163681726	4.509716668	5.090026941	6.461839218	8.508971314	11.52490952	16.20563994	23.53277019	34.93258823	52.82568617	81.0560084	124.8051461	190.7490714	288.6002151	432.4921885	638.6112582	918.9811867	1273.720018	1678.626772	2075.632321	2402.820136	2646.393755
RbSn_mp-11054	8.158844455	5.254581598	4.015712217	4.296815291	5.773620159	8.145920097	11.10850323	14.89306663	20.48019466	29.40176587	43.88138901	67.40050577	105.0337518	163.1125041	249.344186	375.0624371	557.5521573	817.9811016	1174.976604	1635.043964	2172.810118	2711.744673	3161.681832	3496.103738
In2O3_mp-1105681	20.21196982	11.9091475	6.894143742	5.066437123	4.750879148	5.208787346	6.321993437	8.387817326	11.95298603	17.64128905	26.18138895	38.86405926	58.07415848	87.4914072	132.3399556	200.141015	300.8345175	444.3574333	636.591505	875.8550111	1146.348506	1411.273395	1630.592579	1794.877849
MnO2_mp-1105767	21.76291093	12.63851427	7.07526572	5.036978645	4.674737512	5.189941817	6.448800263	8.750107734	12.67057711	18.88031759	28.15966216	41.90309312	62.73583049	94.76488436	143.8361774	218.3441833	329.4897375	488.7848609	703.289434	970.7907885	1271.870037	1562.714244	1795.974285	1959.852761
Yb2S3_mp-1105888	17.11823498	10.12278547	6.14813914	4.853741215	5.001369028	5.966623606	7.541828853	9.964190791	13.90357226	20.26681045	30.09564058	44.88718769	67.24754864	101.4120399	153.6133641	232.6732659	350.040484	517.5055775	743.0857799	1026.954865	1353.247978	1678.573571	1946.254726	2132.925438
Sr2Si_mp-1106	10.05082272	6.558498544	4.872933823	4.864802526	5.983845832	7.858783686	10.33740868	13.73380572	18.82747679	26.80500401	39.63306437	60.73420568	95.12634693	148.553298	227.2130016	340.5545018	504.622996	739.9543505	1063.650911	1479.141302	1960.951256	2442.875336	2850.303709	3154.741732
SrP3_mp-11108	12.60366058	8.010543723	5.371909498	4.580452017	4.788576353	5.617200832	7.080749797	9.486277759	13.28208986	19.02792494	27.76298195	41.60468626	63.87481826	98.5484536	150.2393438	226.251349	338.6522948	501.821927	725.2843858	1006.507926	1324.540345	1637.145612	1900.411083	2094.654939
CrSi2_mp-11191	11.44846649	7.686736976	5.220379502	4.466274957	4.738533739	5.712758261	7.459552803	10.41231657	15.22799512	22.62235829	33.58160577	50.08272256	75.5946224	114.9710218	174.6845613	264.4285606	398.2720191	591.7166149	855.0411612	1186.597941	1563.246365	1931.585582	2231.220868	2436.377665
Rb2Se_mp-11327	7.005510891	4.300835225	3.168732362	3.330340267	4.629596527	7.009326439	10.19642768	14.15042193	19.67134374	28.34045256	42.46689662	65.50982805	102.5732683	160.4468504	247.7492206	376.7052179	565.4164436	836.0733894	1207.478675	1684.179663	2239.304234	2797.361517	3262.69479	3596.839289
GaSe_mp-11342	16.26675391	8.872568334	5.24943502	4.278770605	4.673314903	5.907125231	7.814251671	10.62343112	14.99122303	21.83257697	32.2900164	48.13472756	72.35223438	109.4997206	166.0929449	251.5457968	378.5641621	560.6618986	807.0739528	1117.02651	1469.931393	1816.199427	2100.836054	2312.705319
Hf3N4_mp-11660	23.51479757	13.67070817	7.593371718	5.257933929	4.617663972	4.743389638	5.42544065	6.883836123	9.57662105	14.03122214	20.78068629	30.64946014	45.25857473	67.3517346	100.9996496	151.8740157	226.92116	332.6543317	473.34671	650.141606	856.4048322	1069.70805	1260.857772	1420.785596
SnS2_mp-1170	18.21960126	10.00016492	5.822222475	4.611568876	4.931207951	6.19817582	8.236054051	11.26189459	15.93057621	23.17913049	34.20921032	50.93833735	76.64891005	116.3635013	177.1965732	269.3159096	406.4502047	603.2218082	869.1325549	1201.643868	1575.988177	1936.5645	2222.064933	2417.7731
SiC_mp-11713	23.99512021	13.33337497	7.082273185	4.788955538	4.417570568	5.086187788	6.582278015	9.087842921	13.10251236	19.32295896	28.65691113	42.6525828	64.05660633	97.00735805	147.1347747	222.4101863	334.1009442	495.0802016	714.4291295	990.9615522	1305.950608	1616.683392	1871.003587	2045.785504
WO5_mp-1178791	22.93407818	12.97070098	7.102036497	4.832607988	4.154692014	4.254073042	4.993255647	6.578782356	9.360699175	13.6975103	20.06999942	29.53189152	44.03530233	66.40495636	100.533914	152.2999883	230.0046214	342.1435815	493.0246356	679.4070527	887.3927005	1090.481775	1262.977784	1399.111342
V3O8_mp-1178905	23.70803174	14.01942676	7.915513638	5.539164544	4.901032262	5.123146393	6.049733316	7.941100148	11.27747658	16.61844497	24.69599931	36.8895918	55.64841148	84.51452683	128.2966565	194.0395977	291.5438954	430.9909039	618.1343589	849.8616885	1108.416236	1357.321513	1559.938602	1708.401708
N2O_mp-1180215	34.49400291	17.05162126	8.343426516	5.380681664	4.672623964	4.957777674	5.934408619	7.763432939	10.8630527	15.78202672	23.28064331	34.72405185	52.44233541	79.75864161	121.1314148	183.0519374	274.6943259	405.9882804	583.0619416	803.4064718	1050.250721	1290.181724	1492.385213	1656.679463
AlO2_mp-1182869	16.18714087	10.33998847	6.334142853	4.677726737	4.235493934	4.491866265	5.428239552	7.320020665	10.55487634	15.50923606	22.75826911	33.63619593	50.50912954	76.56334057	115.9695502	175.229861	264.1563712	393.3689237	568.4575755	784.9654752	1024.77972	1254.934303	1442.825144	1575.734829
Gd2Se3_mp-1188175	12.58863027	8.212945211	5.570805961	4.857804704	5.234206998	6.242106583	7.844015386	10.45895492	14.82907616	21.81551883	32.43967233	48.41801761	72.81323958	110.3516251	167.8129935	254.9368852	384.3975891	568.7594607	815.9945603	1125.512063	1477.875781	1822.01102	2097.95036	2286.855126
TlBr3_mp-1188193	17.65796572	9.530832521	5.80853153	4.901700321	5.544282924	7.170724789	9.473788323	12.60128785	17.33864877	24.89050883	36.74042871	54.97470516	82.94679359	125.8661136	191.3972695	290.7728545	439.2636951	653.0263142	941.9923777	1302.091901	1705.307543	2090.857795	2389.727537	2583.116949
Lu2S3_mp-1188532	11.56231987	7.970771931	5.541012826	4.749894079	4.921763873	5.733581732	7.284345678	10.02327522	14.5685794	21.53897026	31.79759233	47.20672171	71.12162272	108.2876084	165.0997149	251.1016558	379.7537881	564.8904607	813.8892237	1122.192354	1466.02074	1794.67436	2051.215896	2209.901143
Ir2S3_mp-1188655	16.70825908	10.54968271	6.498007657	4.99747098	4.797205656	5.282260745	6.385281387	8.459984242	12.11777289	18.01002189	26.7649126	39.44294441	58.25101827	86.97970937	131.3351582	199.3899248	301.0729092	445.455122	637.6298964	876.8618224	1149.724216	1419.622817	1641.951321	1802.096136
CsS3_mp-1188913	13.5844145	7.785646923	4.911432024	4.2804679	5.022375037	6.78000692	9.372940861	12.94838905	18.21364468	26.3462601	39.01410718	58.86186175	90.12568262	138.8680132	213.213945	324.6547613	489.3403396	725.641372	1046.901226	1451.93957	1911.485594	2357.079148	2710.586765	2948.376964
As2S3_mp-1189572	19.89610376	10.81960653	6.173391191	4.743551959	5.014771164	6.404618436	8.749643497	12.21456157	17.38951721	25.19255459	36.87822516	54.54066588	81.80025366	124.1350856	189.1510859	287.7004497	434.8973781	647.4364569	935.8423277	1295.4014	1696.898621	2080.359804	2378.101133	2566.749548
Y2Te3_mp-1189791	11.6066148	7.119157299	4.860102965	4.501501172	5.270800931	6.726542354	8.709899591	11.55527064	16.0625842	23.29377755	34.61906282	52.17627135	79.38940975	121.1864072	184.3989499	278.9657838	418.4649788	617.4854801	886.7719331	1227.561144	1618.874405	2004.173542	2319.150472	2549.038903
Sc2Pd_mp-1190862	6.590039245	4.882071248	3.895381644	3.949521296	4.828450477	6.451819699	9.00910217	13.00970542	19.13928898	28.1795778	41.56962463	62.42076779	95.85494947	148.3666789	227.9028163	346.7086308	523.9529781	781.2458244	1130.43984	1560.873424	2027.700933	2448.296604	2740.644026	2873.791979
TmH3_mp-1191179	31.74662808	17.10883738	8.63820692	5.229109261	3.929997649	3.568566798	3.844092872	4.807537027	6.629676721	9.498028532	13.72003488	20.02677325	29.70073533	44.42466509	66.37689445	99.00823088	147.5733612	217.8364135	313.4485329	434.4593347	576.4545364	729.0018903	880.2786054	1024.435008
DyH3_mp-1191571	31.9251789	17.14572092	8.649796586	5.221807071	3.902879316	3.521354027	3.770923516	4.688991624	6.426763148	9.156717511	13.18746917	19.25587562	28.62505396	42.90608205	64.14293959	95.62115222	142.4647814	210.3929014	303.067242	420.5259374	558.4676006	707.0324285	855.1792894	997.0876201
AsS2_mp-1191613	18.82512288	10.3441002	5.944095015	4.626816468	4.847220341	5.996701141	7.939547245	10.93950337	15.63833484	22.896495	33.8257611	50.31074629	75.66240075	114.9330395	175.2491089	266.8141781	403.3936534	599.4943813	864.2147809	1194.2144	1563.343296	1915.042019	2190.318931	2378.565942
SmH3_mp-1192065	32.78395739	17.37141155	8.754841737	5.365505629	4.105920573	3.775083199	4.070909153	5.052052678	6.904398299	9.851066541	14.26149656	20.94314388	31.25720419	46.94962777	70.23818243	104.6462114	155.624851	229.2852797	329.6824882	457.054453	606.5678124	766.7592492	925.2420619	1077.358057
HgO_mp-1224	24.54037748	14.78178791	8.353381808	5.774528137	5.007299115	5.050496778	5.668224029	7.099524709	9.852695996	14.51523038	21.61882378	31.88325589	46.84768163	69.39803189	104.0442402	157.0392536	235.7214322	346.5610568	493.5241011	677.5474914	891.3266865	1109.434523	1296.988081	1441.067417
Sc2Te3_mp-12383	11.28935387	7.302664347	5.08662141	4.567706945	5.016825717	6.082948657	7.788318958	10.50424234	14.8077267	21.40396908	31.44966482	47.19340693	72.21959987	111.0405613	169.2021227	255.2528717	382.4781305	566.1375007	816.5158272	1131.967675	1490.186096	1841.077476	2129.208214	2330.868846
Na2Se_mp-1266	9.758620552	5.680193586	3.71894465	3.347202639	4.117333338	5.919388551	8.658841148	12.33745021	17.45873313	25.14697653	37.22491565	56.65311672	87.97612725	137.1767613	211.4621955	320.8817572	481.1413769	712.3738534	1030.747475	1437.14396	1906.652587	2380.962657	2785.685405	3081.371398
CsGe_mp-1273	7.802202536	4.824785949	3.566860893	3.753593641	5.101683689	7.381100742	10.2407636	13.77745805	18.92415947	27.23616107	40.85382049	62.90457385	97.93592989	151.9889806	232.902977	351.9644234	525.500152	772.996146	1111.564017	1547.538953	2058.593349	2574.493003	3008.43433	3334.162377
MgS_mp-1315	13.90403979	8.363728189	5.267714016	4.170995302	4.45692377	5.854466638	8.299713075	11.85148182	16.88823191	24.23348873	35.31405121	52.67254512	80.48702378	124.4452781	191.3718354	290.6540278	437.3272399	650.9346751	945.3416382	1315.878586	1734.609561	2150.774256	2497.380359	2724.628802
Cs2Pt_mp-13548	6.526982684	4.269510136	3.295601783	3.468184358	4.546030239	6.206607396	8.088183734	10.37769504	13.98782415	20.26157519	30.85234424	47.87176738	74.25014191	114.1859084	173.7216813	261.695005	390.1863911	572.9048569	822.3076167	1146.155884	1536.309329	1949.711438	2319.036306	2610.611279
NdS2_mp-13568	12.29162707	8.112476672	5.517499243	4.794674034	5.168350186	6.247838675	8.052736816	11.01570665	15.85161718	23.38292565	34.70564422	51.8758861	78.50929513	119.8604898	183.1234476	278.7743127	421.1919341	625.2690784	899.8985777	1241.677469	1624.485136	1989.803086	2273.998214	2456.973225
Mg2Si_mp-1367	13.3529246	8.289998218	5.595506942	4.949488935	5.428801373	6.568623987	8.274891053	10.82430446	14.77047697	20.93457558	30.76519126	46.90738995	73.27839167	114.2870718	174.5707251	261.3749247	387.4602648	569.3279309	820.2643496	1141.98287	1514.821489	1892.031417	2223.547409	2490.173995
Ge3N4_mp-13852	24.98464015	13.68081896	7.255489206	4.933596505	4.551072716	5.183285206	6.593083739	8.959673435	12.78727456	18.75086632	27.66388313	40.87227945	60.84121007	91.4513009	138.1840789	208.8123985	313.9129838	464.9587926	669.5590005	926.3009176	1218.321882	1506.661403	1743.861058	1910.762692
P3Ir_mp-13853	14.06607398	9.103673596	5.835117741	4.584562314	4.400109649	4.862344019	6.010615726	8.186781788	11.8507953	17.43498741	25.56351055	37.6854145	56.43293604	85.47335682	129.723227	196.6718315	297.1475056	442.4580219	638.6109456	881.937798	1154.686463	1420.619467	1639.794958	1793.205522
NdAs2_mp-13961	11.09451132	7.481798913	5.224774698	4.562955375	4.834102592	5.744693435	7.403052675	10.24670562	14.85788139	21.8250911	32.0670397	47.60161089	71.91997184	109.7141451	167.0994481	253.4151796	382.4473726	568.9713428	821.3458514	1135.31096	1486.934363	1825.741058	2094.821787	2265.826984
S5N6_mp-1419	28.01445957	15.22196915	8.116655725	5.553668199	5.255016673	6.257551448	8.306980867	11.53011092	16.40669481	23.70248124	34.55633215	51.01028703	76.60371414	116.4810345	177.3945046	268.8494116	404.7336907	601.306856	869.0744049	1202.86504	1574.539684	1929.950599	2206.586398	2376.229235
Al7Te10_mp-14506	15.26741181	8.482658047	5.173556471	4.349153934	4.850454757	6.162204242	8.07956599	10.81897635	15.07476769	21.84188325	32.38016017	48.58346497	73.5312491	111.840631	170.0610111	257.6450194	387.4203652	573.2470626	825.1067113	1143.261948	1507.512843	1866.564528	2161.961213	2380.681566
P4S3_mp-1468	19.21498201	10.87588238	6.530546333	5.071182442	5.434760462	7.234841748	10.39952984	14.9738527	21.34188408	30.3916959	43.71696662	64.24107293	96.84080223	148.2669266	226.8827166	344.4003161	519.1716664	774.1739634	1124.099382	1559.172577	2039.216431	2496.795626	2852.401084	3058.136559
P4S3_mp-1469	19.14364033	10.84060897	6.521773283	5.072397946	5.444211998	7.259096791	10.44898333	15.05672876	21.4621019	30.5536237	43.93420268	64.54775941	97.3029747	148.9864793	227.990299	346.0632855	521.6543047	777.9063214	1129.610323	1566.838856	2049.094099	2508.71535	2865.93692	3072.392593
BaSi2_mp-1477	13.10213827	7.721218979	5.060539184	4.538347412	5.231380935	6.679763232	8.713140333	11.60020628	16.05908098	23.13428681	34.34835476	52.19991314	80.50993912	124.249118	189.6518988	285.8337529	426.3557505	627.1899788	901.0660333	1250.161843	1653.463433	2056.085924	2397.764249	2664.869908
LaS2_mp-1508	13.28110735	8.174145127	5.357029065	4.643832955	5.10556744	6.293539167	8.139904223	10.99843255	15.56530122	22.72920449	33.71059125	50.63076103	77.01144944	117.8172181	179.7158024	272.4216889	409.5452535	605.8159172	871.1857962	1204.34495	1581.700484	1947.871061	2243.342916	2453.475086
Sm2Se3_mp-15081	11.8602324	7.865327238	5.445629733	4.837037261	5.284140117	6.373701996	8.098402579	10.89875276	15.52780135	22.8535891	33.95225918	50.71202157	76.46818524	116.2271766	177.0397956	269.1036801	405.959298	601.2290994	863.377668	1190.978947	1562.063593	1921.643509	2206.298264	2395.164085
CaTe_mp-1519	11.12238526	6.562340141	4.367237704	4.03144502	4.913407403	6.69266348	9.141330795	12.41144117	17.2779619	24.98438508	37.19914666	56.41026506	86.49234519	133.0155951	203.5971639	309.1105121	464.6571476	687.2767849	990.0669736	1374.533804	1817.121903	2255.347242	2613.830258	2868.461688
FeS2_mp-1522	14.5908949	9.494984686	6.039451641	4.854853874	4.975038191	5.916778716	7.663614432	10.63542185	15.58838441	23.39565581	35.05602946	52.32833387	78.55812865	119.0725422	181.5183973	276.7412034	418.8774108	622.1630394	895.3155759	1235.709974	1617.972165	1982.09245	2259.890779	2429.657195
Sr3As4_mp-15339	11.61805556	7.129026345	4.876778169	4.532678866	5.34503883	6.911621315	9.100803897	12.23474533	17.08493613	24.72499943	36.6854176	55.50501689	85.1481398	130.9095396	199.6296774	301.3387469	450.5936111	663.9438282	953.8658913	1321.374108	1742.769314	2157.938325	2500.777621	2754.909998
KSb_mp-1536	8.424834672	5.399914156	4.058170366	4.268712562	5.701795258	8.092302905	11.15569763	15.09378839	20.86384039	30.0195448	44.85800789	69.02012526	107.8892128	168.2762134	258.451785	390.3330183	581.9264912	855.2496504	1229.290147	1709.304432	2266.208815	2817.958364	3270.123653	3596.254708
AlP_mp-1550	17.27782562	9.413469766	5.379743766	4.175187287	4.470227646	5.772809806	7.959164343	11.19581278	16.03995373	23.38948834	34.54913184	51.70953136	78.49205559	120.0713827	183.2890782	277.8626	417.8152183	619.5273576	894.9445567	1242.834061	1638.522782	2026.568671	2343.474798	2567.265734
KTe_mp-1554	8.928517088	6.083011457	4.724685599	4.875168301	6.10193417	8.070387014	10.65729808	14.20953899	19.52443634	27.8075405	41.10893324	63.06273466	99.01144791	155.0145491	237.5219611	356.4529822	528.8764371	776.6410432	1117.533458	1553.977528	2056.75388	2552.576256	2958.533614	3239.822772
Rb2As3_mp-15556	10.80017156	6.738069287	4.784837895	4.652799109	5.704702655	7.549865044	9.998457517	13.34856795	18.43379357	26.48800807	39.35277417	60.06338036	93.18398216	144.4750134	220.956901	332.9440993	496.0906437	729.0516149	1046.739065	1451.410362	1917.141225	2376.878654	2756.808969	3037.905812
Mg3N2_mp-1559	17.52466162	9.91924563	5.725412525	4.39304979	4.537573025	5.579979201	7.37473684	10.13809136	14.46705222	21.25473967	31.76263591	48.07171304	73.56357082	112.975708	172.470093	260.7651312	390.4408845	576.2995723	829.9273871	1152.421728	1523.623344	1892.870734	2201.044572	2428.379861
NaSe_mp-15668	11.87453191	7.466079364	5.160361873	4.753225485	5.479617604	6.924194957	8.977010052	11.95150155	16.54304266	23.75622208	35.1908124	53.64446508	83.36388426	129.5477989	198.2673242	298.5683366	444.8115791	654.5599578	941.7090896	1307.822941	1729.261652	2147.587921	2499.116197	2763.86015
K3P11_mp-1568	14.55463444	8.061060982	4.839419529	4.006262551	4.584254755	6.248977843	8.898304429	12.64643428	18.0568202	26.1593227	38.53964368	57.85305245	88.38661268	136.1296684	208.8275554	317.4161908	477.939536	709.523348	1026.224286	1426.215033	1879.94786	2322.552358	2679.729801	2924.317225
Be2C_mp-1569	22.85677551	12.75073206	6.790376755	4.625780981	4.223867133	4.723064309	5.931141275	8.064971988	11.64568215	17.37653955	26.16011373	39.47623378	59.84110564	90.92294163	137.6561899	207.1253241	309.4507695	456.3603254	657.0374304	912.8566794	1209.200141	1507.605707	1761.977244	1955.732493
Zn3As2_mp-15700	10.6949893	7.818091164	5.662982206	4.9563072	5.180890042	6.084523354	7.828992879	10.92801708	16.04488666	23.80616714	35.13209583	52.15642034	78.77543208	120.4745921	184.5861234	282.059511	428.4772054	639.8957415	924.4279712	1275.516848	1664.258122	2031.490037	2310.278817	2466.144088
GaSe_mp-1572	16.13136264	8.831183371	5.248378423	4.295700103	4.691111325	5.907389166	7.785159329	10.56621819	14.90938266	21.71940223	32.13075804	47.92027252	72.08043518	109.1503846	165.5981573	250.7815235	377.3444325	558.7196123	804.0994213	1112.780388	1464.251929	1809.045552	2092.965846	2306.033272
P2Rh_mp-15953	14.91258971	9.683100604	6.216909081	4.992428378	4.987515358	5.706541233	7.149178437	9.718419992	14.06406899	20.89507938	31.07671518	46.25017606	69.43309918	105.1490705	159.7032255	242.2580348	365.1921286	541.0880668	777.3764188	1071.640833	1403.383953	1725.237832	1984.139584	2161.64453
Ba3Si4_mp-1619	11.63095978	7.486938392	5.281201558	4.809294473	5.315745858	6.421516389	8.109787069	10.69612424	14.69506432	20.82314262	30.41406127	46.01787291	71.42860174	110.8621482	168.7776093	252.3969634	374.51722	551.3441952	795.2590678	1107.043209	1467.395959	1830.864307	2145.662847	2384.212132
Si3Os2_mp-16608	16.20153146	9.898684934	6.000018153	4.616614713	4.485039036	5.007430827	6.100309101	8.082323161	11.52906819	17.07148541	25.33589601	37.34232334	55.1332248	82.15703635	123.5668445	186.6785271	280.6518556	414.2685818	593.338122	819.0778635	1081.628033	1349.618786	1582.689444	1766.511252
Sr2Sb3_mp-16897	9.754095276	6.425886057	4.713295904	4.546356832	5.362194498	6.856322635	9.033737426	12.29519625	17.33131137	25.03939622	36.88208412	55.58637634	85.37948929	131.4580041	200.0789524	300.9281493	449.3115073	663.2395607	955.7293975	1326.489928	1750.171801	2166.18166	2505.73333	2739.038892
Yb2Ge_mp-1694	10.94801656	7.572869908	5.419861415	4.827550432	5.15508012	6.089553983	7.739999005	10.58948614	15.3084771	22.58590665	33.37380964	49.63159469	74.79643836	113.646503	172.5787829	261.2074712	393.2197182	583.0522511	839.8085787	1162.527488	1531.517506	1896.082024	2192.076366	2383.596517
Rh2S3_mp-17173	12.16415568	8.438811919	5.76597876	4.807003174	4.86590357	5.61152412	7.15126304	9.944971519	14.61670107	21.75609839	32.14532172	47.55967762	71.31869971	108.218005	164.8073007	250.8575648	380.0488361	566.262372	816.4214216	1124.821031	1466.39179	1790.209468	2040.601292	2193.113336
CsC10_mp-1721	25.89087632	14.2952208	7.776593224	5.415237913	4.867046144	5.166118704	6.099846868	7.884709598	10.98519112	16.00557505	23.79016661	35.81249819	54.48598704	83.09880567	125.9179975	189.2138092	282.0891011	414.7147908	594.1472299	819.8940518	1077.634154	1334.585551	1557.020793	1739.077541
BaC2_mp-1735	19.32881266	10.22062169	5.75055033	4.41132279	4.595768487	5.655871527	7.364138602	9.866890357	13.73386754	19.85084324	29.42537598	44.32177432	67.47414333	103.0072866	156.3979512	235.4919325	351.5261312	517.4865227	743.2540179	1029.628331	1359.87561	1692.142046	1977.674039	2202.736534
Au3F8_mp-17407	24.62040486	14.31187952	7.791049677	5.195856493	4.372858059	4.397102751	5.099920194	6.713451807	9.659077543	14.35316312	21.1986944	31.03732788	45.69175332	68.19227805	103.030745	156.7169041	237.5715388	353.2315134	507.0788163	696.1384002	907.2978289	1112.551516	1282.103171	1408.866291
GeAs2_mp-17524	16.62695965	9.45825755	5.742005842	4.67127858	4.905143936	5.867804563	7.448603183	9.954058656	14.00445168	20.37759095	30.09769113	44.91756659	67.78636532	102.9629015	156.3151798	236.4401968	355.2018005	525.1174562	754.2400412	1040.951154	1365.33202	1681.957814	1943.815004	2143.518258
Ca5Sb3_mp-17564	9.595450662	6.367391969	4.768433266	4.751723649	5.811228714	7.627918379	10.12457587	13.65207665	18.9565685	27.13322545	40.03421851	60.99024089	94.97762672	147.8037659	225.9296375	339.2788787	504.403758	741.9428748	1068.075704	1484.109962	1962.085199	2434.105908	2824.60796	3102.943551
Ba5P4_mp-17566	11.19608254	6.789095998	4.66617339	4.422743902	5.356635109	7.045979966	9.253546505	12.23599016	16.82016231	24.22254317	36.1235439	55.11574175	85.1072408	131.3131067	200.4777927	302.3484533	450.9545083	662.598048	950.7965775	1319.332952	1747.771701	2176.979177	2538.214705	2814.408168
WSe2_mp-1821	19.74750069	11.06470187	6.418139002	4.891910728	4.848040386	5.528570526	6.708665148	8.634132258	11.91762939	17.32482048	25.65080504	37.96856573	56.23243533	83.8298059	125.98794	190.181586	285.7828348	421.8514255	604.184286	832.9893646	1096.385823	1360.756245	1583.898491	1753.726229
K2Se5_mp-18609	11.87023497	7.097533238	4.725692885	4.332199216	5.152240128	6.815120142	9.176915295	12.51422346	17.59783322	25.54862794	37.94548066	57.37609234	87.96119224	135.4256446	207.367067	314.7539664	473.1136078	699.9011737	1008.038129	1397.573347	1841.151269	2272.100017	2618.407115	2864.778279
SiAs_mp-1863	17.07695494	9.147946463	5.256179013	4.168816611	4.51353758	5.780176862	7.836601794	10.89686722	15.57442522	22.75169214	33.5872981	49.97339988	75.13327163	113.9120478	173.0991275	262.48264	395.5526554	587.0504666	847.0570639	1174.000513	1544.618075	1905.961721	2200.230735	2414.427443
LaP5_mp-1864	12.38286215	7.599048368	4.915305192	4.088298249	4.242441017	5.021039594	6.454204175	8.848703968	12.63402504	18.28787216	26.65316482	39.54362785	59.95516174	91.72293351	139.668553	211.3689329	318.7235724	475.4178552	690.1786561	960.2257357	1265.425705	1565.417689	1818.509935	2007.437682
Fe3O4_mp-18731	17.64105949	11.75234213	7.214756986	5.340347513	4.930782785	5.354202959	6.568022401	8.965119722	13.20959234	20.00639925	30.07659027	44.75240761	66.74959062	100.4950878	152.4091347	231.6555336	350.0817892	519.2070233	745.3878831	1025.625153	1339.263564	1638.576419	1869.255315	2012.41236
SnTe_mp-1883	12.89025829	7.630686542	4.957283956	4.342798778	4.827945719	5.947144484	7.602112421	10.13240492	14.22404248	20.71310412	30.61782552	45.58822169	68.43870837	103.4194522	156.6483006	237.1253205	356.9282869	528.4906159	760.1344326	1051.686989	1384.773419	1712.36146	1982.230082	2183.843633
V2O3_mp-18937	18.93399899	12.23513926	7.436458152	5.46272004	4.954474981	5.243925716	6.26675855	8.351432249	12.03697366	17.91073125	26.70197784	39.83210834	59.90588823	90.74204486	137.5684885	208.0565317	312.7997373	462.646541	663.5839394	912.2815094	1189.858856	1456.364594	1669.284688	1814.783954
NiO_mp-19009	27.48054084	18.09400147	10.12459639	6.329255052	5.033135932	4.986663239	5.770107921	7.486986672	10.568093	15.59284873	23.20592822	34.44375881	51.33796266	77.23896612	116.8553319	176.6202759	265.100485	391.6282633	562.6306219	778.0870264	1027.25814	1280.401798	1490.560856	1622.821147
WO3_mp-19033	32.23844466	17.42697954	8.839918775	5.637014731	4.769835897	4.945853417	5.826182608	7.578848007	10.67343529	15.68493796	23.2038022	34.15051585	50.35828131	74.95606567	112.5955029	169.8343496	255.021084	376.3781586	538.8708759	741.5287634	972.3180206	1201.387272	1392.695814	1534.968414
CoO_mp-19128	16.82839088	11.22465739	6.993914937	5.284225973	4.966491809	5.452895668	6.719455607	9.168921069	13.46710933	20.31904136	30.47352851	45.33819656	67.72836002	102.1598318	155.13562	235.9626366	356.7535652	529.3529636	760.3443575	1046.768109	1367.774448	1675.129585	1913.932338	2064.676382
ErN_mp-19830	14.15255613	9.848365341	6.561635937	5.230335823	4.998884523	5.421044991	6.541119968	8.766103346	12.68606413	18.88473216	28.0308499	41.50053585	61.95654529	93.44839636	141.6579824	214.8243723	323.8413435	479.2600186	686.7954286	944.5330231	1236.726885	1524.264457	1759.024033	1917.37607
ZnO_mp-1986	15.60984194	10.98614153	7.084219318	5.42297502	5.085683116	5.551866788	6.843069398	9.410996056	13.96811536	21.22724266	31.88408673	47.31509717	70.44726161	106.1151865	161.3786216	246.3035587	373.7276273	555.7109391	798.2181664	1097.045331	1429.389157	1743.47389	1979.820091	2115.662538
FeTe2_mp-19880	10.44403277	7.198980456	5.094852061	4.497967359	4.808979248	5.743815735	7.411455977	10.27335489	14.96984997	22.14640108	32.69958052	48.54127031	73.10123354	111.2330483	169.5012966	257.7285037	389.7887514	580.0512228	836.5387822	1155.294158	1512.300861	1854.65112	2121.986603	2286.821127
PbO_mp-19921	24.43669111	13.34474508	7.468159845	5.423185589	5.127327624	5.620783755	6.589307087	8.222330263	11.08086121	15.90347973	23.51058772	34.99960271	52.22552961	78.24953156	117.6805171	177.1095153	265.0085114	389.8906585	557.3936075	767.817783	1010.718438	1256.739635	1467.902321	1631.554089
FeP2_mp-20027	13.08348528	8.947631121	5.999599881	4.964719232	5.056324357	5.872527048	7.465727576	10.28359337	15.01533926	22.40601068	33.40952407	49.89899934	75.27084829	114.4752658	174.2659753	264.533878	398.9978983	591.9470543	851.7685298	1174.836556	1536.251214	1881.261635	2149.643023	2318.997756
FeAs2_mp-2008	12.10115517	8.286366471	5.686124326	4.835752689	5.016449715	5.87520345	7.492973808	10.32719216	15.04091359	22.31641172	33.05084267	49.09646156	73.81453634	112.0424511	170.3593843	258.4871483	389.9455105	578.5935636	832.1076729	1146.540704	1498.319974	1835.937162	2101.837602	2272.16784
InTe_mp-20320	11.6435983	7.203336879	4.83104342	4.21258988	4.541641835	5.482374691	7.083408986	9.709452343	13.88297366	20.18237309	29.54225329	43.8888401	66.39371629	101.1600825	153.4438927	231.4719959	347.8190509	516.5403587	746.5812888	1035.780773	1363.80716	1685.907969	1952.282531	2140.706941
InP_mp-20351	14.83704612	8.707150306	5.51548628	4.647104835	4.965826004	5.967070805	7.574084915	10.10223292	14.14380557	20.45135197	30.12266429	45.12357307	68.62173604	104.8455058	159.2815671	240.1547958	359.5451675	530.9242645	763.5292422	1056.529146	1390.481804	1720.582057	1999.798781	2216.918506
CrF4_mp-20488	30.64581714	17.17011267	8.946027427	5.815562283	4.933198379	5.092229774	6.023084318	7.95349274	11.38610314	16.91119748	25.20138559	37.45729375	55.98602819	84.45499222	128.1175033	194.4679586	293.3293876	434.4322948	623.0204006	855.7060005	1114.143487	1359.89267	1553.497022	1687.903874
MoO3_mp-20589	30.10017368	16.8449999	8.772345491	5.669397399	4.926545377	5.34509753	6.598261117	8.847195003	12.58818637	18.47927581	27.29457541	40.31926383	59.96137086	90.05959828	136.0320159	205.4998631	308.7739878	456.969262	657.2309444	907.6587116	1191.343473	1469.808369	1694.920978	1844.682224
RhF3_mp-2068	27.78844701	16.55676353	8.957450589	5.879670305	4.916704764	4.959246508	5.774479386	7.614047047	10.99041527	16.46305463	24.58297749	36.34773932	53.86185485	80.67150435	122.0127181	185.3123065	279.9275126	414.5394653	593.3008059	812.9147049	1056.980344	1289.742043	1472.645023	1596.481614
Si5Ir3_mp-2084	15.7901257	9.653775949	5.880956361	4.570656597	4.505792895	5.105614968	6.285391041	8.369249894	11.95804617	17.72307295	26.33841259	38.88245817	57.49217675	85.77824547	129.1420893	195.2498859	293.7218303	433.856183	621.8737065	858.9962663	1134.388993	1414.192443	1655.039287	1841.644175
PbO_mp-20878	27.89293778	15.28980489	8.531240369	6.016284986	5.505029864	5.906489011	6.83129552	8.420453932	11.21589117	15.96893515	23.54214463	35.08685567	52.49344534	78.80147955	118.5034959	178.0645843	266.0958887	391.5586197	560.09643	770.9593613	1013.121772	1258.716742	1469.499619	1627.003857
VO2_mp-20974	17.89949546	11.40758431	6.891748006	5.054308233	4.593449889	4.898314486	5.926352408	7.996117113	11.60441332	17.26003816	25.60257108	37.97703021	56.89136653	86.00546752	130.3453507	197.4129067	297.7476312	442.2226518	636.6286306	877.0442491	1144.457621	1400.667863	1606.111717	1747.772406
TbN_mp-2117	13.7274181	9.559321929	6.418395333	5.159908414	4.96779903	5.427293251	6.598716762	8.890374059	12.87584853	19.11627716	28.30611459	41.93120792	62.78939631	94.98995303	144.1840266	218.6758429	329.7788168	488.7401776	701.6066565	965.7684094	1263.980493	1555.841337	1792.712197	1949.906206
TeO2_mp-2125	32.40695869	17.9783481	9.528939383	6.28362445	5.550145999	6.06214492	7.427658546	9.766811469	13.57955671	19.57569849	28.63296414	42.18144665	62.80542501	94.5595101	143.1294449	216.530049	325.7317229	482.6360455	694.522119	958.202763	1254.561762	1542.953844	1772.640943	1919.378334
PbS_mp-21276	15.00837971	8.813914499	5.55692921	4.678767028	5.015362499	5.978995845	7.400074771	9.588459251	13.23417773	19.20047589	28.488319	42.57374229	63.95281299	96.54495744	146.1092599	220.9337572	331.7366097	489.3077627	701.1301285	968.0729024	1275.25547	1580.812272	1835.734243	2029.785125
ZnO_mp-2133	16.37533857	11.37189336	7.220486396	5.462846316	5.095304288	5.550610905	6.824092453	9.353318559	13.85242753	21.0541636	31.66556639	47.02613744	69.9943923	105.3569822	160.1435338	244.3144731	370.4486722	550.3381069	790.0444646	1086.03775	1416.479497	1730.217439	1967.674006	2106.344929
InSe_mp-21405	14.37867979	8.162547067	5.089114637	4.351646246	4.857620173	6.105822128	7.933596632	10.61971397	14.87350041	21.63494134	32.05015434	47.87018061	72.02276228	108.9764029	165.1736012	249.9588871	375.7835388	555.6125713	798.3665207	1103.999457	1453.234557	1796.992697	2080.669676	2294.465857
Te2Os_mp-2142	14.3211243	9.025926697	5.807067361	4.739593483	4.753056892	5.320190916	6.40425802	8.374671658	11.83508857	17.42500388	25.79440234	38.02999867	56.27031518	84.08100863	126.8243658	192.2112803	289.8748778	428.7397767	614.1082531	846.0793127	1112.713819	1379.193296	1602.431777	1768.411198
Ge3Ru2_mp-21945	13.46419655	8.967100634	5.997241897	5.000013967	5.100735527	5.865797286	7.330026909	9.923889601	14.30356302	21.1627976	31.35659551	46.53837781	69.71842476	105.3268826	159.4837767	241.1332129	362.4072109	535.5954624	768.1163698	1058.674948	1389.585555	1716.701411	1987.356841	2178.68168
In2S3_mp-22216	15.04678208	8.702412378	5.392998903	4.506435119	4.892157193	6.050806378	7.884220964	10.70606844	15.18381194	22.17787245	32.82656054	49.06870626	74.17872875	112.9252179	171.8903796	260.6495394	392.3807315	581.1066583	836.0488721	1155.461251	1516.356494	1866.103621	2149.632261	2357.101458
SnS_mp-2231	15.52785018	8.776549125	5.322397221	4.389889143	4.770784153	5.948688564	7.792937317	10.58699273	15.00682611	21.93651265	32.46604393	48.34871259	72.61759335	109.9355877	166.9916404	253.4393254	382.1565822	566.5289431	815.3623391	1127.362968	1480.973545	1824.847224	2103.199735	2305.639756
In2O3_mp-22323	21.41251653	12.32010029	6.976991279	5.063665693	4.751188531	5.244212714	6.389593219	8.466509485	12.03125231	17.73984664	26.34450312	39.11615594	58.40386961	87.90513053	132.9264016	201.0460597	302.1609169	446.1663128	639.1239035	879.7834298	1152.680616	1420.687809	1642.722238	1809.514809
CoO_mp-22408	17.65478808	11.59027699	7.088786701	5.282546604	4.94067807	5.4268689	6.689492004	9.116564063	13.37821836	20.20102439	30.34010435	45.15689701	67.39605603	101.5438417	154.1166496	234.3716838	354.2153382	525.2663168	754.2266433	1038.799862	1359.032999	1667.082872	1907.476909	2060.647526
GeS_mp-2242	16.65911641	9.296330427	5.468203105	4.362845667	4.656799384	5.820694179	7.741760047	10.69378916	15.32514863	22.49534119	33.29393054	49.54116278	74.42750696	112.831159	171.6648645	260.8674995	393.8584224	584.8495207	843.1803442	1166.883605	1532.335327	1885.56057	2168.445802	2368.971652
NaO3_mp-22464	21.65237868	12.76373152	7.375982704	5.377331451	4.978799574	5.39369526	6.485638789	8.52539214	12.0199875	17.60203463	26.17273128	39.38523755	60.00413324	91.8114115	139.7210595	210.975496	316.0951424	466.668767	670.0803153	923.9534768	1209.081329	1485.136958	1711.757348	1880.379901
Pb3O4_mp-22633	22.66718157	12.58196102	7.076203644	5.180063354	4.893644894	5.340067595	6.296751756	8.005763146	11.01135141	15.98294537	23.66513231	35.15995977	52.42776753	78.65607039	118.5667311	178.8782326	268.1225786	394.6665959	563.9840779	776.3524552	1020.526348	1265.46709	1474.689491	1640.872135
HgO2_mp-2278	17.40000545	11.04666029	6.632506569	4.7815478	4.223950717	4.381426547	5.221625488	7.037149556	10.25590994	15.25174233	22.43559452	32.83026499	48.55302797	72.88107277	110.5059836	168.3942664	255.8973842	381.9497244	550.4996687	757.8200153	989.1321799	1213.95883	1398.458277	1528.31875
ZrCl3_mp-22871	16.16896899	9.555012187	5.967606394	4.91345316	5.152195184	6.1363987	7.783642517	10.41003191	14.6112626	21.15383067	31.18947529	46.84059532	71.6034001	110.2366413	168.9247571	256.7418174	386.7635016	573.1992233	824.6528106	1136.972158	1484.249438	1814.109725	2075.988044	2261.702316
PBr5_mp-22874	19.57854446	10.65704352	6.21257315	4.950962914	5.33720035	6.749145848	8.977932122	12.23244975	17.20482994	24.89151569	36.55398695	54.19886169	81.31471394	123.3616664	188.2157589	287.1457375	435.1598703	647.8184216	934.3318153	1289.827596	1684.696066	2056.442929	2338.227108	2516.037438
PbI2_mp-22883	20.37122018	11.40991264	7.191427286	5.934707369	6.274594076	7.438202933	9.02939027	11.2688849	15.01956274	21.50810827	32.15520286	48.7315578	73.93702044	112.1397702	170.0997115	257.9489166	389.4700755	578.9967107	834.6893335	1152.477743	1510.212985	1859.21037	2135.66737	2309.326584
EuCl2_mp-22887	15.9714578	9.770420519	6.169147057	5.10560619	5.438907432	6.588404613	8.399316312	11.19876248	15.74911921	23.04786899	34.31652141	51.47832576	77.86748797	118.6721642	181.3036529	276.1776251	416.7621041	616.7063343	884.8644481	1219.827148	1598.266941	1962.420214	2246.071423	2431.620364
CuBr_mp-22913	13.25013892	9.053842514	6.191454112	5.280438061	5.514512526	6.461317491	8.152174016	11.05650535	15.92344932	23.58699228	35.10350302	52.46328298	79.28149274	120.970176	185.048864	282.3075082	427.0717106	633.544938	909.5829002	1251.278585	1632.83756	1995.666989	2274.296753	2445.933502
CuCl_mp-22914	14.74597981	9.88340482	6.493691909	5.334017651	5.46821696	6.391383775	8.083856417	10.98703778	15.87628546	23.65705105	35.42428673	53.11388681	80.27987175	122.413294	187.2441674	285.6700227	431.8668568	639.971604	918.478377	1264.743678	1653.556362	2024.673923	2309.33851	2484.666931
MnSe_mp-2293	12.26139308	8.080722264	5.510456828	4.705679176	4.888853058	5.706932259	7.217344004	9.789652508	13.93284201	20.21380387	29.60441158	44.1656534	67.31284651	103.4377178	158.0175704	239.4790372	360.7806971	536.4243365	775.1195284	1073.078338	1407.428326	1731.539624	1995.002547	2173.955068
SbO2_mp-230	28.11220298	15.65137769	8.286716072	5.523723422	4.930688091	5.414196515	6.675985302	8.891217491	12.56980392	18.36856283	27.02492132	39.74106535	58.82578519	88.08184343	133.0295414	201.4543182	303.6076443	450.1178793	647.5317515	893.8724553	1172.619527	1445.592433	1665.65949	1813.558339
Bi2Se3_mp-23164	16.74146555	9.540825016	5.821994646	4.753656455	4.972414966	5.823268075	7.118295665	9.155491886	12.60182004	18.2730907	27.05726035	40.21167179	59.94494042	89.92369034	135.7344524	205.4334598	309.2011034	456.8868223	654.8229282	903.0366681	1187.109486	1467.870962	1700.027383	1875.778242
IO2_mp-23170	26.76805818	14.60865459	7.780176452	5.36022348	4.946580777	5.53632986	6.884399171	9.217397216	13.09558247	19.21411684	28.35116463	41.79468115	62.01821113	93.09991876	141.0234715	214.277051	323.8719578	480.8591984	691.6828575	953.5243409	1246.953513	1528.694459	1750.393291	1899.671739
SbCl5_mp-23176	20.4510994	11.09280066	6.394299485	5.028660965	5.430569606	7.002874932	9.552999692	13.24025745	18.70175328	26.94981386	39.40317001	58.43961601	88.1195543	134.5339616	206.0996328	314.7444892	476.9085458	710.535873	1026.71222	1419.554749	1854.868746	2263.355808	2570.569203	2756.568936
WCl6_mp-23178	22.09687957	12.06974019	6.851028471	5.216155876	5.384629546	6.623551081	8.707233129	11.83171201	16.64304241	24.08241267	35.37667195	52.52199259	78.97722926	120.0550258	183.239191	279.1354458	422.0494932	627.1851701	903.9011723	1247.9635	1631.567603	1995.607931	2274.996617	2452.182487
CuBr_mp-23212	11.71448351	8.451169701	6.017139844	5.190239008	5.360739285	6.212499944	7.869182313	10.83092163	15.78353011	23.41539643	34.68122246	51.64838412	78.08563781	119.3851963	182.817148	279.0773057	423.0104898	629.5462221	905.9758559	1245.793633	1620.659863	1972.295338	2236.323676	2384.306755
SnBr4_mp-23216	21.55910802	12.00420685	7.365897602	5.920166188	6.381858394	8.174034256	11.01683357	14.98338061	20.77313873	29.61794512	43.19649186	64.09822594	96.59901887	147.0954904	224.4335792	341.4501188	516.780555	771.5051609	1117.327723	1543.633074	2011.592223	2452.579375	2784.588	2965.051298
Li3Bi_mp-23222	14.51249325	8.87839685	5.897938239	5.134715548	5.515241708	6.474752947	7.868767231	9.976832484	13.37825968	18.90218548	27.89645322	42.69159669	66.68144959	103.6943049	157.7940432	235.2204921	346.7177821	506.2635182	726.2360263	1011.525466	1350.224906	1704.89387	2030.91712	2310.655278
BiTe_mp-23224	11.98033637	7.269724887	4.716154832	3.961253313	4.12262022	4.845147608	6.180468111	8.494934002	12.30481217	18.11844774	26.6114853	39.21677847	58.51484079	88.19670587	133.4076128	202.0570794	305.3857353	455.0690987	657.919606	911.7659146	1199.223499	1480.338694	1709.383708	1867.566701
CuBr_mp-23227	12.3788371	8.377668674	5.741949975	4.949091791	5.247952987	6.256579603	8.027125592	11.02615539	15.97989671	23.67683555	35.13300959	52.34114945	78.94725379	120.3872546	184.2218169	281.4178893	426.7455806	635.0395449	914.5358835	1261.041362	1648.00877	2016.274288	2300.227874	2476.412704
PCl5_mp-23228	22.48873829	12.32164735	6.950057914	5.256765957	5.449113161	6.818051365	9.166557797	12.67879053	17.97186313	25.99168367	38.0802181	56.55550926	85.42246979	130.6628931	200.4470044	306.2520926	463.8921473	690.6958691	997.4437207	1378.470568	1800.434223	2195.709923	2491.808574	2668.854589
FeBr3_mp-23232	11.56868281	7.521173115	5.071802094	4.309281511	4.495856401	5.32419135	6.881535104	9.551464081	13.8341479	20.23199111	29.59611786	43.86720477	66.40685891	101.7232254	155.6828644	237.287783	359.9468548	537.9642052	778.4932246	1074.569556	1399.450793	1704.05764	1939.099137	2085.223202
GeI4_mp-23266	17.77757605	9.854648127	6.100652573	5.150859297	5.768083434	7.35746504	9.599621521	12.6641566	17.36432886	24.91542915	36.78126724	54.99804614	82.88672799	125.7206433	191.3561342	291.2637652	440.8295872	656.0491678	946.4287042	1307.512068	1711.159482	2095.981858	2390.545223	2572.85147
CuCl_mp-23287	12.94548989	9.292295884	6.451782689	5.434107844	5.543616446	6.386033331	8.035917603	10.99339355	16.01744001	23.92411513	35.74143734	53.49063668	80.90985334	123.5768643	189.1805125	288.7675198	437.1341865	649.004348	932.1843712	1281.550757	1668.957418	2032.893351	2304.990662	2459.259493
HgBr2_mp-23292	25.02865673	14.36803269	8.783718645	6.655586358	6.483057652	7.417266482	9.10387836	11.72335388	16.02090627	23.09466984	34.21664113	51.08178628	76.50444365	115.0266425	173.3395486	261.2630906	392.5644766	582.1393465	838.124811	1154.740594	1509.362366	1857.367399	2135.927158	2302.817677
NbCl5_mp-23307	19.43875864	10.86444595	6.366752055	4.970225157	5.336167967	6.948685893	9.663970152	13.61965982	19.39135077	27.94904626	40.70914308	60.1088124	90.34093908	137.6410111	210.4691122	320.7922659	485.5879739	724.0934992	1048.418472	1452.262015	1901.219441	2327.161968	2651.384362	2840.830604
EuBr2_mp-23311	15.45284468	9.24663814	5.87596394	4.961684048	5.415054316	6.660346337	8.482803684	11.17006668	15.50834353	22.54545967	33.4918714	50.08674365	75.32075428	114.0518416	173.5037183	263.9271202	398.3872248	589.8791426	846.7759054	1168.186295	1533.284107	1888.170826	2168.053148	2354.133654
IO3_mp-23315	31.65860007	17.45070771	9.070753588	5.926678717	5.213133687	5.687453919	7.012028886	9.358364308	13.24526285	19.34656513	28.44153687	41.8396875	62.04804612	93.148242	141.0137405	213.9233353	322.8575897	479.2636611	689.9721531	951.894824	1245.498568	1528.227534	1749.561204	1890.24979
BCl2_mp-23316	21.14999094	12.0922961	7.194783502	5.445090251	5.65972905	7.347757579	10.39441491	14.84125516	21.06745629	29.94008663	43.03083629	63.25177193	95.46889353	146.3766157	224.1470435	340.1216758	512.2284808	763.2011273	1107.803817	1536.591632	2010.020983	2461.626953	2812.04591	3011.534256
Na2O2_mp-2340	17.79878403	10.29802639	5.988312517	4.55652583	4.665697083	5.721641011	7.554264811	10.34726703	14.68419515	21.48596295	32.08872158	48.69565466	74.86811787	115.5632841	177.111623	268.3279958	402.0405763	593.6255235	855.1774017	1187.578944	1569.766686	1949.331235	2262.61799	2483.559599
BaH2_mp-23715	18.93039413	9.376159068	5.095722974	3.695748566	3.78475217	4.887296984	6.89053258	9.840537123	14.06581498	20.23508777	29.40052221	43.29300741	64.60688764	96.85009114	144.2700097	213.2623194	314.5497492	461.8596991	664.4654787	918.7635299	1206.774149	1499.332172	1762.493667	1976.73312
AlH3_mp-23933	31.1191794	14.30385236	6.531051779	3.993657519	3.551743932	4.158341576	5.598668083	7.992648144	11.68881372	17.19484225	25.23083404	37.0842821	54.9483226	81.88157117	121.8409017	180.7268494	267.7389172	394.1228482	567.8560043	787.3537896	1037.617705	1289.922877	1513.248044	1697.475094
Sb3Rh_mp-2395	11.77943603	7.677966512	5.26123623	4.612452812	4.962643596	5.947442062	7.617083632	10.40742947	14.9775192	22.0332991	32.51195555	48.25298937	72.50259089	109.9084685	166.8477482	252.8283834	381.0865346	565.2761032	813.5091116	1123.432241	1473.811696	1814.894335	2089.739783	2275.695538
NaS_mp-2400	12.91367288	7.580822591	4.849140875	4.266242919	4.986190196	6.646304225	9.099391784	12.54901457	17.70764054	25.74125858	38.41771906	58.66367504	91.03217803	141.5665719	217.7698597	330.2249985	494.6279803	729.9621414	1051.606874	1461.337502	1931.790762	2394.656876	2773.828777	3048.362682
CaC2_mp-2482	19.01961289	10.21968961	5.687399595	4.285668296	4.416525587	5.469898247	7.2973988	10.09732476	14.43207505	21.14498769	31.43042239	47.27999316	71.95213094	110.0348195	167.5557197	253.1330278	379.22629	560.3773547	807.5845923	1121.012162	1480.087008	1836.067039	2134.548614	2360.527052
BeTe_mp-252	19.415901	10.64770718	6.133702743	4.65358001	4.75584571	5.793433284	7.517101867	10.03729052	13.90300996	19.9970238	29.50048443	44.20256196	66.96222324	101.9090948	154.6036485	233.0079549	348.5854836	514.5902004	740.4545516	1025.439719	1352.262409	1680.661917	1959.191399	2163.49484
MgTe2_mp-2604	14.66552527	8.414309177	5.266494724	4.484752896	5.011173914	6.324063431	8.190211717	10.8244581	14.95142321	21.61460768	32.12246208	48.38550731	73.46647245	111.9677329	170.4214615	258.181531	387.8335014	572.9493046	823.4877786	1140.35345	1504.699481	1866.050101	2163.911281	2381.253589
SrC2_mp-2630	18.60983879	9.943171029	5.577166416	4.24449715	4.43041955	5.547332503	7.417142858	10.1901709	14.41200739	20.9477917	31.01540123	46.57682857	70.79402482	108.126379	164.4440275	248.1179907	371.2548481	548.0179306	789.0612934	1094.530394	1445.224859	1795.418349	2091.923737	2317.377087
TlF3_mp-2632	29.5074985	16.48596399	8.675550679	5.7181213	4.901874029	5.046755471	5.859967461	7.542170875	10.57706608	15.53983838	23.02395349	33.97219397	50.26274186	75.09709181	113.2492559	171.4274478	258.0022834	380.9161577	544.7122172	748.1599071	978.6838582	1205.193075	1391.600439	1528.938963
Na3N_mp-2639	12.9818539	8.381666769	5.940884029	5.400833649	5.892622293	6.925411992	8.385313115	10.51493062	13.79218258	18.99229544	27.62816133	42.49032212	67.53591655	106.6387764	162.9289386	241.7517903	354.675057	518.1727256	746.5446419	1043.536745	1393.922744	1758.998012	2094.899758	2376.536419
P4S7_mp-2650	19.76308011	11.21278175	6.680138624	5.14647183	5.46720086	7.206026073	10.27043568	14.7219958	20.97437278	29.91652621	43.09484388	63.33976036	95.41398662	145.9976468	223.500786	339.7075508	512.7511453	764.9757429	1110.597122	1540.320319	2014.76912	2466.034361	2813.981938	3012.286739
Te2Ru_mp-267	12.46286924	8.12369159	5.460097822	4.653562654	4.865522691	5.690066708	7.158808648	9.692149103	13.93549224	20.56797878	30.41136078	45.04223219	67.36497425	101.7561538	154.4146348	234.4466374	354.0557203	525.374889	755.442685	1042.377091	1367.434209	1684.901849	1941.569623	2117.350802
SrO2_mp-2697	23.72010291	14.05571837	8.190941166	5.746636062	5.326303881	6.106765975	7.779930718	10.3955465	14.37863438	20.48349092	29.84673715	44.40365042	67.38135651	103.314282	157.8487139	238.7814628	358.0907394	530.6392512	766.4011467	1061.404555	1394.328073	1725.185504	1999.735996	2178.39163
ZnI2_mp-27161	18.61477498	10.99594604	7.114338324	5.800911449	6.138051758	7.609562535	9.963631171	13.35783408	18.55982068	26.79532036	39.5958339	59.1582861	89.12357016	135.1275521	205.1542266	310.8016822	468.7128145	697.5585796	1008.012518	1392.75874	1822.689467	2242.211912	2574.155503	2765.001446
FeP4_mp-27164	14.72818213	8.831247794	5.338335813	4.225664748	4.39775722	5.393771801	7.190422327	10.14767167	14.93763686	22.34740896	33.30027729	49.45257768	73.93247522	111.6743352	169.7611198	258.3935273	391.2486243	582.6816266	842.1597172	1168.143736	1537.463415	1895.144085	2179.398367	2371.893235
P4Ru_mp-27173	15.8361449	9.219694257	5.436733451	4.223263952	4.337033159	5.264159692	6.950400544	9.72540075	14.22855217	21.21109947	31.52852205	46.67793811	69.50971332	104.5876369	158.5324804	240.87183	364.255026	541.8031072	782.1370483	1084.164789	1427.631078	1763.437764	2035.810272	2228.777535
AuBr3_mp-27213	16.54698073	9.580054514	5.861692169	4.764058102	4.959440198	5.850319591	7.324828411	9.719584702	13.69383214	20.01964304	29.57416388	43.7971213	65.33324168	98.4435812	149.44877	227.4858233	344.287285	511.1565578	734.528681	1012.147459	1324.557013	1625.954054	1867.084914	2039.967965
CrI2_mp-27215	11.90916698	7.504640809	5.096978011	4.527719479	4.994041518	6.118102064	7.906131021	10.74838062	15.28469865	22.2671376	32.79181992	48.95086987	74.26662976	113.6031143	173.4552951	263.5465551	397.8076839	591.1219368	852.533337	1178.732034	1544.708137	1895.967828	2174.681777	2363.122504
IrBr3_mp-27397	19.32049373	10.93735944	6.460785574	5.043948448	5.162010527	6.102406178	7.640329673	10.03338932	13.96739454	20.31920766	30.01720979	44.36190117	65.75536757	98.35162863	148.5422052	225.4810162	340.7361684	505.5176528	726.4635914	1001.920782	1314.032439	1618.326836	1861.065653	2026.420963
TlBr2_mp-27398	17.3928769	9.730723394	5.980150938	4.968831345	5.409533028	6.657482888	8.412667431	10.88604096	14.83892461	21.34007738	31.63429753	47.40380272	71.38085712	107.9536244	163.7235657	248.2861456	374.2692952	554.6247202	797.6335141	1101.83741	1447.180007	1784.492782	2054.540428	2239.834034
S8O_mp-27465	22.45173071	12.44457313	7.100741022	5.310135713	5.499674788	7.049400237	9.799974274	13.85270938	19.69634278	28.22487765	40.86639915	60.1908844	90.5827684	138.3577375	211.7556135	322.3499505	487.1633895	726.2472079	1052.224895	1457.382288	1905.233553	2328.379042	2649.818364	2833.940838
LiTe3_mp-27466	12.79161033	7.964025894	5.31266305	4.59724373	4.908037403	5.813461137	7.288965515	9.672968204	13.52478525	19.53073639	28.74054127	43.11241912	65.78954946	100.8540392	153.4833597	231.5539261	346.929494	513.0103987	739.0042779	1024.185037	1349.680359	1671.244027	1940.140464	2138.99899
Tc2O7_mp-27485	29.91624522	16.846981	9.127647976	6.070552563	5.476251042	6.258297258	8.097457576	11.09896155	15.71795109	22.66066087	32.92641777	48.29907547	71.94299768	108.5196196	164.1504493	247.4764865	371.3041594	550.7785728	795.411824	1099.892081	1439.518976	1768.359664	2028.770779	2186.01324
Ta3N5_mp-27488	26.71663551	14.77913011	7.851315574	5.273948386	4.59578188	4.761383624	5.508251141	7.030778342	9.790688665	14.34233137	21.25559113	31.38390638	46.37214062	69.00669544	103.4409391	155.5145288	232.5231641	341.5087773	487.0701141	669.8526111	881.7423259	1098.443432	1289.485986	1446.353233
PI3_mp-27529	20.14522712	11.18240058	6.856242918	5.613361659	6.127676033	7.77760074	10.24091126	13.63807673	18.74214486	26.79261558	39.36270135	58.73512841	88.63679976	134.8116268	205.5326267	312.8535006	473.5403412	705.7331726	1019.857321	1408.926457	1840.461594	2249.937068	2560.555722	2740.243362
SrSe_mp-2758	12.22079214	7.127843547	4.648306819	4.083179375	4.774743254	6.414748848	8.787389679	11.96579124	16.60933181	23.87978689	35.37733332	53.48949638	81.94065863	126.0705916	193.0800815	293.2848409	441.552822	655.1185062	946.1696964	1313.267899	1732.820906	2150.445281	2495.800715	2733.474275
TiBr4_mp-27634	19.82179649	11.2041838	6.943986294	5.607519834	6.100425975	7.953707025	10.95402049	15.15613108	21.1822798	30.2067983	43.93443649	65.11307811	98.28377195	150.0699209	229.3270449	348.762279	527.228501	786.7384231	1140.121665	1576.990058	2057.988709	2514.33003	2862.724417	3055.938896
CsBr3_mp-27641	13.98275179	8.122686088	5.296764938	4.652164973	5.433596715	7.284040123	9.952494427	13.52171377	18.73480528	26.87534111	39.66898312	59.67844341	90.99124974	139.674171	214.175471	326.6700785	494.3693121	736.5970827	1065.837307	1477.556427	1940.642633	2388.721493	2739.400343	2954.215678
AuCl3_mp-27647	21.05197564	11.77574397	6.790000057	5.194997654	5.249188216	6.189711354	7.804888303	10.35674071	14.51145109	21.13980591	31.27187304	46.51086025	69.70126802	105.3845997	160.1741089	243.4482734	367.3470081	544.0763652	781.1556267	1076.528037	1409.419602	1730.867181	1985.87057	2161.80458
Te2Br_mp-27648	14.5712466	8.491708005	5.369504944	4.573617822	4.982889916	6.070783008	7.716618354	10.24890857	14.35307277	20.87425379	30.84533422	45.9474973	69.08853912	104.732516	159.3423897	242.3327162	366.149246	543.3053228	781.4524976	1078.463297	1412.589742	1733.223408	1987.173734	2167.037441
Y2Cl3_mp-27678	13.88113494	8.422880283	5.482057632	4.782170791	5.361177443	6.75304293	8.842463424	11.95695942	16.84566013	24.53438902	36.46031702	55.05288848	84.2760691	129.6950255	198.7057577	301.9137855	454.1237294	671.5050389	965.0886991	1332.950712	1747.248032	2144.196834	2456.757434	2671.203732
Tl4O3_mp-27684	17.88296453	10.1104127	6.021538727	4.745058938	4.78399713	5.425660092	6.46206449	8.152566587	11.09031707	16.01162162	23.73083388	35.37228456	52.8403593	79.22587663	119.1604522	179.2698935	267.9704322	393.6579804	562.4640775	776.3807559	1026.535915	1283.313502	1509.317166	1695.831114
BiI_mp-27708	13.82004099	7.977449541	5.129643208	4.49036497	4.981144174	6.026095606	7.430580256	9.522246541	13.03736392	18.86591325	27.95481838	41.58267565	61.95889576	92.8206698	140.0160303	212.103542	319.8887059	473.7693929	680.5309713	940.4828843	1238.188636	1530.782561	1769.036734	1946.128466
ICl3_mp-27729	20.9563291	11.49261279	6.678288732	5.262021818	5.641899238	7.16956418	9.61896511	13.16063507	18.46804402	26.58043615	38.90652395	57.75738567	87.09038434	132.921126	203.6657493	311.2425892	471.8433672	702.8053428	1014.578145	1401.226327	1829.129764	2229.473136	2527.973156	2705.267516
CrBr3_mp-27734	16.07265174	9.225551219	5.6228605	4.631820514	5.042428604	6.325321886	8.336246892	11.36062143	16.11819981	23.56763519	34.88311629	51.94225583	78.04449153	118.3683978	180.4000224	274.8250078	415.6763573	617.3202115	888.8161887	1227.72964	1608.984204	1974.349731	2259.825331	2451.530441
Re2P5_mp-27736	16.45634918	10.17167412	6.267822236	4.86389361	4.71082747	5.240480188	6.41282971	8.568145618	12.25895527	18.07929812	26.74143878	39.59729565	59.14714817	89.16293028	134.9538627	204.2768207	307.5555071	455.2550269	653.5246331	900.7875572	1181.4017	1458.22021	1689.433157	1861.469371
BiF5_mp-27743	41.01252797	21.67405036	10.72402877	6.654607246	5.56505	5.801776035	6.894458539	8.96664306	12.50075475	18.1324286	26.58762241	39.05571197	57.80501632	86.54829821	130.6574613	197.7122989	297.6933003	440.8133369	632.8327793	870.3969423	1135.473468	1389.933194	1589.75705	1720.294526
PdI2_mp-27747	11.79377778	7.337726571	5.00518019	4.625620338	5.467207407	7.138128201	9.523096611	13.00078203	18.43926104	26.91411156	39.67796194	58.79236436	88.09630142	133.9617629	206.0429294	318.2277926	487.9769401	731.393866	1055.623344	1451.221127	1877.992177	2254.610028	2502.299771	2617.045071
Ag3P11_mp-27821	16.55006031	9.750367733	5.875444423	4.664196173	4.844312748	5.855536933	7.599811903	10.39732484	14.92346582	22.03564988	32.8035847	49.02862261	73.89003166	112.2340607	170.8737358	259.5289449	391.2220959	579.6567738	834.0236693	1153.24552	1515.52686	1868.232863	2152.431822	2352.461113
PdBr2_mp-27857	13.4516369	8.045145558	5.228434034	4.628408506	5.336387946	6.949552391	9.388699401	13.01467626	18.62084166	27.19987931	39.99544184	59.20993318	88.91982826	135.6724137	209.1432598	323.2657445	495.9726985	744.2674618	1075.49779	1478.261488	1908.983671	2285.240842	2531.553009	2646.975704
MnI2_mp-28013	13.39839392	7.952143851	5.14886734	4.52865711	5.159957683	6.572700488	8.598163994	11.54006932	16.1897375	23.59687059	35.01470661	52.3368189	78.80719595	119.550998	182.0925667	277.222028	418.9536061	621.4847197	894.179818	1236.111798	1623.965947	1999.013456	2294.577657	2495.923618
TcP3_mp-28029	14.63268903	9.331052667	5.973114244	4.808599116	4.815276791	5.524678269	6.945168892	9.450488051	13.61754049	20.07518643	29.68524375	44.1723756	66.58067438	101.2140054	153.8614486	233.1358127	351.2701146	521.1919044	750.4623232	1035.751592	1355.607899	1664.510333	1914.16955	2088.305737
Na2S5_mp-28127	15.67651143	8.853031609	5.294993832	4.305633769	4.788299853	6.32952458	8.806466975	12.38041045	17.66041339	25.6706676	37.93990062	57.03762185	87.17308866	134.3161624	206.2786246	314.0287076	473.3258755	702.5947572	1015.26619	1409.573198	1856.065045	2288.789221	2632.588943	2861.513545
CdI2_mp-28248	17.47646438	10.40639128	6.687278548	5.516366448	5.866708977	7.141856457	9.054313022	11.81003506	16.20584842	23.40091976	34.73755209	52.00785079	78.18121683	118.1061097	179.0478413	271.5626114	409.8684249	608.8831763	877.491914	1212.360343	1591.592787	1964.612966	2261.507773	2442.85789
Lu2S3_mp-2826	20.21501564	12.08498797	7.381410585	5.550209382	5.398555724	6.226808869	7.756217638	10.13034579	13.94252178	20.08549873	29.65747294	44.25286839	66.54352608	100.6572072	152.3793675	229.9575717	344.9767926	510.3622996	734.3069954	1014.435976	1334.028205	1655.653228	1924.524495	2102.64752
PtI2_mp-28319	15.48688271	9.080105692	5.686514068	4.726465269	4.995782969	5.870192313	7.163693743	9.197732554	12.68702507	18.48712948	27.44667679	40.66237562	60.17007496	89.64641653	134.949368	204.50488	308.6327119	456.9274065	655.4643895	904.7925677	1191.763874	1477.225642	1712.431169	1885.361121
Mn2O7_mp-28338	30.63776212	16.57961314	8.543256501	5.624302943	5.03950098	5.620265895	7.066824545	9.56122624	13.63171993	19.99609399	29.56522747	43.89288597	65.77905184	99.52135878	151.0617114	228.7666632	344.0928247	509.5297511	733.1386579	1012.266259	1325.971712	1628.836761	1868.898207	2028.279559
NaTe3_mp-28478	12.25833667	7.482543627	5.030817568	4.554306375	5.203190148	6.519075599	8.366919402	11.07686712	15.38787193	22.27799918	33.06131173	49.86742834	76.09596945	116.5032209	177.5136352	268.5156388	402.6437571	594.303767	854.1237281	1183.042237	1560.337988	1931.888161	2237.214424	2462.204472
ScN_mp-2857	14.55685349	9.536640458	6.238736893	5.065407599	5.04607821	5.708653242	7.050953722	9.426141678	13.38443161	19.57514129	28.98554006	43.53239113	66.36697369	101.5853078	154.3110747	232.3066109	347.3761837	512.91573	737.81259	1020.326609	1340.588918	1654.908707	1915.910442	2104.589572
YbSe_mp-286	17.71473645	10.57873422	6.548234133	5.157397921	5.167599618	5.875334838	7.016065536	8.820195536	11.94503415	17.26548121	25.73906579	38.57520945	57.78207873	86.74779515	130.660032	196.9468631	295.1312385	434.8147209	622.5090842	859.1895693	1134.58478	1416.429614	1657.508731	1833.84207
NbBr5_mp-28601	18.0427243	9.978382768	5.947572555	4.842428353	5.276907113	6.659487714	8.779655917	11.86506641	16.63763405	24.1151481	35.54876831	52.86053262	79.36113999	120.266337	183.1675819	278.9392392	421.9266057	626.8492224	902.6447035	1245.739237	1629.471492	1994.695066	2276.711685	2461.734039
Mg2C3_mp-28793	19.9387599	10.76960627	5.874628265	4.267253648	4.258105692	5.189166967	6.90923548	9.608145384	13.81560811	20.32192972	30.23642766	45.4189653	68.95642168	105.2397216	160.0452312	241.6107269	361.9030769	535.0332978	771.7567549	1072.345513	1417.49688	1761.171155	2049.861676	2265.016308
PtS_mp-288	15.57231024	10.01084953	6.305134201	4.910984129	4.701450868	5.13659427	6.202644338	8.271991438	11.92659327	17.74354009	26.28289567	38.611259	56.96987399	85.09909072	128.5702879	195.3948026	295.6503074	438.6192205	629.3339191	866.8404331	1138.1283	1408.106785	1633.391614	1796.894491
BaC20_mp-28979	23.31563595	13.70447141	7.757688847	5.322950243	4.49086671	4.442547131	5.018697906	6.376654728	8.796427956	12.61627656	18.41862704	27.4183799	41.58862435	63.37300706	95.73842252	143.3901905	213.8332637	315.6301865	454.0158599	627.1211985	823.2765492	1020.055905	1195.421923	1341.529983
P2S3_mp-29014	19.94878427	11.07099839	6.421497965	4.913205734	5.221245998	6.858371201	9.718341234	13.89852022	19.86481409	28.50694005	41.27690566	60.7892485	91.47509303	139.6684733	213.5837888	324.8076485	490.6037191	731.5786607	1060.95079	1471.240671	1926.110906	2358.710946	2691.844411	2887.826712
SiI3_mp-29109	21.17868372	11.87827717	7.468823785	6.093624417	6.57052492	8.319504147	11.02179647	14.75929642	20.30156984	28.98112596	42.57191897	63.6972844	96.58584664	147.5433711	225.3203952	342.7084699	518.4439508	773.8438053	1120.703167	1548.339353	2018.789941	2465.48243	2805.94771	2992.770197
InI2_mp-29312	15.30119611	8.592102107	5.416815567	4.689252265	5.343046139	6.841869664	8.895292847	11.70322771	16.07130103	23.15864389	34.32547922	51.41888959	77.43856225	117.1993256	177.9650801	270.3430654	408.347756	606.3816692	873.5584763	1207.782233	1585.740572	1951.785539	2240.29982	2433.199384
Ta3Br7_mp-29412	16.93982236	9.510795799	5.706939366	4.620056434	4.890384835	5.902916066	7.477848418	9.897242243	13.84634319	20.18416547	29.8448523	44.18943728	65.68455711	98.46851803	148.8428675	225.8901203	341.1689926	505.9443747	727.1306536	1003.551378	1317.24607	1623.259264	1870.437622	2048.868311
TaCl4_mp-29465	20.53977038	11.44689028	6.633067865	5.13852296	5.25565417	6.251492547	7.928938748	10.55362042	14.78607351	21.50355146	31.81221	47.50277728	71.66535665	109.0294601	166.2986274	253.0054788	381.7518358	565.4693592	812.1107035	1118.843412	1462.262154	1790.15368	2047.449288	2225.117558
PdCl2_mp-29487	19.39818777	11.48035899	7.050925234	5.77254887	6.255496504	7.865547231	10.41177094	14.18408316	19.97815231	28.88945128	42.36058047	62.89102354	95.01474183	145.9374747	226.0676845	350.0329103	536.6915175	804.5669551	1162.542474	1599.123257	2067.646016	2478.329406	2743.67968	2853.695907
ClF_mp-29504	33.11136527	17.99369297	9.420761364	6.305318667	5.791545333	6.659729309	8.578270835	11.70090333	16.56309361	23.94079209	34.90128356	51.36628072	76.81294751	116.5412657	177.805934	270.7788746	409.5645659	609.6854138	880.346448	1215.320662	1584.689918	1930.299672	2187.359893	2332.184092
NaGe_mp-29657	11.69677243	6.807144942	4.474098346	4.112286786	4.97566192	6.715778575	9.135113849	12.4136611	17.28546554	24.95091188	37.19882769	56.89969339	88.37049363	137.1640367	210.0748045	316.8491973	472.2162137	694.2506194	998.3709794	1388.641442	1842.919196	2300.225784	2691.203778	2998.05253
Tl2Te3_mp-29711	12.31479083	7.485841189	5.0169538	4.501417757	5.028152335	6.079841344	7.513016952	9.682308318	13.31314072	19.28586506	28.62044756	42.81540937	64.3522257	97.06121308	146.5839664	221.1716833	331.6253839	488.943663	701.1720258	970.3437336	1282.671959	1595.82801	1858.992703	2060.552476
La2I5_mp-30282	11.0592838	7.061294273	4.936011428	4.521737351	5.094907323	6.297874867	8.140948343	11.03004209	15.63065622	22.7378142	33.52753058	50.20486766	76.3868537	116.9316562	178.2180532	269.8970913	406.0256609	601.7724856	866.4636477	1196.817773	1567.03786	1920.444305	2196.458899	2375.936321
RbAu_mp-30373	9.039500847	6.176912958	4.667368052	4.658355865	5.656518672	7.239256447	9.245018559	12.10144843	16.75321531	24.41545592	36.59514109	55.52241123	84.68793997	129.1138846	195.7821531	294.7725363	439.6841894	645.402559	924.8599418	1285.137455	1712.89479	2153.146744	2530.579596	2813.822673
Sr2Pb_mp-30828	8.597323987	5.860011502	4.558144166	4.680610119	5.795955531	7.610754756	10.09089464	13.63908852	19.01551481	27.28534018	40.25323156	61.1888495	94.91768255	146.9167119	223.2216329	333.4671836	494.1143837	725.9181824	1045.901391	1457.90592	1937.942741	2419.675801	2821.340448	3099.25468
Rb2Te5_mp-31002	9.902724024	6.380531299	4.621932596	4.487860327	5.38815865	6.963457691	9.125773627	12.24783468	17.10487488	24.73016958	36.62781099	55.37155704	84.98181551	130.7390067	199.4252815	301.1892169	451.0231775	666.0017743	958.8174599	1330.195915	1755.297628	2171.160082	2507.22754	2741.7892
NaP5_mp-31086	17.20764116	9.467999751	5.471257272	4.304131358	4.61916968	5.901813823	8.023565333	11.19106717	16.0113828	23.40627637	34.68152129	52.02766822	79.0832666	121.0848173	185.0350196	280.8915113	422.7696787	626.8013302	904.6871168	1255.357873	1653.624274	2041.78973	2355.877898	2578.033006
KBi_mp-31104	8.654376316	5.746317354	4.414470398	4.595571487	5.856880088	7.834893558	10.34227181	13.73381084	18.90849809	27.14716222	40.3463925	61.6157584	95.54569047	147.7672542	225.064576	337.6805173	501.5561497	736.0778526	1057.777795	1471.955082	1955.816703	2441.153372	2846.003994	3140.148941
BaAs2_mp-31243	12.24275572	7.539579881	5.111819226	4.622707171	5.227428543	6.495811147	8.351183516	11.14442092	15.56099763	22.49042258	33.22052605	49.98944446	76.3368662	116.9421048	177.8394211	268.0567689	400.8676906	591.2106574	849.8354236	1176.931294	1551.433565	1921.371404	2229.605941	2459.781597
MnO2_mp-33009	16.44612647	11.071705	6.89252659	5.117324789	4.672957584	5.009935735	6.124955762	8.396682773	12.40682601	18.72155523	27.95114106	41.39697533	61.67939641	92.85855715	140.6975208	213.670535	323.2297568	480.7100014	691.7481979	951.7307891	1239.537226	1511.66538	1721.471526	1852.36325
Cu2O_mp-361	13.149413	9.716005606	6.65195405	5.380570833	5.249506409	5.865557211	7.318256718	10.12054669	15.04175876	22.84185666	34.29522576	50.96494559	76.08663707	114.8736399	174.8385698	266.7241272	404.3931607	601.1036284	863.891645	1189.368273	1554.44994	1903.805721	2170.765357	2324.772875
CdS_mp-370	11.65048461	8.263680785	5.835140696	5.079664686	5.362322594	6.340056269	8.103258143	11.15749046	16.25678882	24.19596856	35.98545765	53.65008907	80.93791911	123.4396882	188.9117189	288.5885454	437.5603905	650.8356311	936.4453156	1289.626627	1682.819357	2054.767878	2336.470447	2500.686178
ZnSe_mp-380	14.61007537	9.250961664	5.90190376	4.851786099	5.109676485	6.164886475	7.931635567	10.78176262	15.48161742	22.96675959	34.28149925	51.08815994	76.49721463	115.6183967	175.957548	268.047934	405.1978138	600.5211374	862.5170381	1190.744201	1564.730095	1929.675462	2218.548513	2408.099776
TiO2_mp-390	28.391126	16.21724484	8.58742465	5.615132726	4.928839652	5.399147278	6.714143206	9.032468276	12.85235147	18.86374866	27.93698174	41.53502161	62.29954652	94.29673112	143.1112031	216.5596515	325.450094	481.8331724	693.8358905	959.7518446	1261.386043	1557.307368	1795.442582	1950.76259
CdP2_mp-402	15.59034569	9.15698027	5.515877754	4.393171203	4.650185382	5.786473167	7.695443825	10.66008671	15.35933029	22.68808862	33.70844448	50.12218257	75.01122637	113.2933009	172.0649224	261.3814761	394.5092946	585.3945444	843.6343038	1168.919362	1540.751955	1906.56514	2202.178937	2404.346369
Nb2F5_mp-466	19.94776906	12.47187437	7.349845375	5.174291066	4.457089846	4.519986474	5.280843594	6.982636488	9.996396787	14.68410606	21.55637845	31.7989248	47.59521368	72.01436236	109.1805895	165.3485791	249.4650318	370.5747568	532.650665	730.8464656	948.7546296	1156.848419	1326.016948	1446.119859
Ge3N4_mp-476	26.21266634	14.75445382	7.812698945	5.173856507	4.592648206	5.042782776	6.249225075	8.379511199	11.91586946	17.48981483	25.83408088	38.15208122	56.70106724	85.10209302	128.5019702	194.1398915	291.7216746	431.6403246	620.78963	858.2234426	1129.363703	1398.994928	1622.288437	1778.965932
NiP2_mp-486	13.85125896	9.203563204	6.033297721	4.944568541	5.049392392	5.907332961	7.544888618	10.39831939	15.17005452	22.63558744	33.76497163	50.41332263	75.97504037	115.5067828	176.0077336	267.6398914	404.2551355	600.1298776	863.6910912	1191.486481	1558.446018	1908.773508	2181.336248	2355.502238
CuN3_mp-504768	27.31096713	15.2505672	7.999470265	5.289776289	4.718770435	5.229779963	6.562919536	8.920267168	12.83411479	19.00150699	28.25543421	41.98563426	62.75215373	94.56826558	143.0510865	216.1076255	324.4694388	479.8080809	690.0306819	954.0047216	1254.342996	1549.87835	1790.326593	1955.025703
Cs2Te3_mp-505634	8.564935332	5.68845121	4.363593317	4.553253577	5.840345184	7.854385026	10.37859511	13.76885118	18.97709639	27.34320737	40.75331728	62.20625613	96.20564558	148.5988808	226.8411891	341.9509223	510.1259381	750.2150221	1077.672138	1496.377761	1980.946887	2458.716943	2844.650381	3113.036214
CrO3_mp-510421	27.99452182	15.53079036	8.24224882	5.497281686	5.01859045	5.781063095	7.513700285	10.36243623	14.81150014	21.57384686	31.62909187	46.70453494	69.86608015	105.6738663	160.2118783	242.0512991	363.5488882	539.0207997	777.9229718	1076.796218	1412.839979	1739.459206	1999.660318	2164.604094
MoO2_mp-510536	18.21010092	11.3948744	6.804867887	4.98588717	4.562176077	4.90321102	5.960855938	8.06262191	11.72876752	17.48358831	25.9280463	38.30658464	57.04031742	85.82622017	129.8868002	196.9076646	297.3041272	441.4737116	634.9174298	874.3910388	1142.408146	1401.771752	1612.556688	1761.757024
Ga2S3_mp-539	17.85812883	9.848364471	5.68960624	4.409514808	4.689985243	6.019733358	8.260538135	11.57753617	16.54148458	24.04381279	35.30433322	52.34365433	78.62620637	119.3521662	181.6891575	275.8641319	416.2413346	618.9370307	894.6328131	1240.119118	1629.460801	2007.197725	2308.42995	2507.933695
NCl3_mp-540572	25.18620253	13.67159263	7.563783375	5.531636194	5.604323931	7.002139563	9.510060072	13.25474283	18.77270182	26.96177049	39.17964965	57.83600158	87.07387287	132.9571178	203.5530286	310.1819793	469.0143164	698.51447	1010.202978	1397.26859	1825.035117	2226.976732	2529.496959	2705.10803
BS2_mp-540668	21.55461643	11.88833235	6.751798576	4.995570827	5.130991199	6.56997138	9.165811839	12.99818742	18.49971136	26.51506538	38.4494811	56.82410065	85.83672385	131.3278304	200.6319466	304.0464848	457.3387452	679.8777575	984.551364	1365.094316	1788.941789	2196.460185	2517.978141	2717.204997
Yb3S4_mp-540678	14.23541653	9.06306469	5.946470583	5.01854	5.27858209	6.207071862	7.74029242	10.26968329	14.50956655	21.30922707	31.70243517	47.42053386	71.50055859	108.5532824	165.1018301	250.4912889	376.9935652	556.9502434	798.2685691	1100.228951	1443.61623	1779.17912	2050.199187	2240.09536
PbI2_mp-540789	20.45468871	11.50127686	7.237369351	5.945497328	6.245510704	7.352819986	8.875096242	11.03697416	14.68591514	21.01572284	31.40207093	47.55608387	72.09696812	109.2835919	165.7184197	251.2718244	379.3000285	563.6275617	812.1626813	1121.227937	1469.79168	1810.816753	2082.201102	2254.411407
RuF5_mp-540829	28.93884173	16.46605889	8.722533015	5.68267205	4.723639818	4.731994075	5.473806166	7.162063805	10.22587016	15.13623082	22.43743715	33.19806032	49.49830641	74.57956174	113.0622	171.6536053	259.2362618	384.3831315	551.0350284	755.0770608	979.9330142	1193.365191	1364.085944	1487.509273
MnF4_mp-541103	36.65757236	20.68388194	10.48058049	6.461729643	5.351495079	5.609926481	6.814121461	9.115683522	13.01317755	19.14888062	28.2666728	41.66692379	61.8884608	93.04051093	140.9445068	213.749656	322.3908959	478.514359	689.2138445	951.2880879	1244.694564	1526.113951	1743.030064	1872.489712
P4Se3_mp-541189	20.80870361	11.19079754	6.375416283	4.889241476	5.169900965	6.614983699	9.028866753	12.52963215	17.68722676	25.4576977	37.19789668	55.14103719	83.02559463	126.344665	192.5462564	292.2661754	440.6969848	655.083808	946.4487957	1309.785944	1715.459898	2104.282879	2408.958585	2604.056541
AuCl2_mp-541656	18.60232163	10.8206093	6.441150388	5.010049671	5.01008864	5.756440782	7.11296579	9.398206486	13.25265995	19.43658346	28.80474111	42.740543	63.80586939	96.1590725	145.9372283	221.9028034	335.2279083	496.7426623	712.9023756	982.2413796	1287.079439	1583.946619	1824.158003	1997.308438
Bi2Se3_mp-541837	14.87916225	8.76963087	5.513823402	4.572610149	4.769407782	5.563845341	6.878407297	9.052484399	12.69526473	18.50518828	27.30780697	40.49186932	60.51815887	91.17002834	137.9402298	208.8984754	314.7158179	465.9842358	669.1435967	923.0560725	1211.340274	1493.742128	1726.14362	1899.863883
SeN_mp-542635	27.60731772	14.62615675	7.755851111	5.397279109	5.126450633	5.954509407	7.599935218	10.22538065	14.37778369	20.84162069	30.62604808	45.37825454	67.97015407	102.7877303	155.9452258	236.1281547	355.2575443	526.2736602	757.3547282	1045.425172	1368.756709	1681.114346	1930.137394	2099.198911
V2O5_mp-542844	27.32270753	15.7807321	8.376301426	5.51666785	4.790218149	5.102400549	6.200892116	8.322977337	12.01800536	17.95423024	26.86693446	39.98478683	59.68690191	89.85125206	136.0684016	206.2195653	310.6178921	459.8549398	660.6301706	911.3842154	1194.8044	1469.842082	1688.632963	1835.392664
WO3_mp-545665	29.07082151	15.6127515	8.046012889	5.29682599	4.599905128	4.833539906	5.735352711	7.511922217	10.64279087	15.690769	23.24208623	34.25648292	50.63088086	75.53956876	113.6887177	171.7816144	258.3877721	381.8628897	547.1228758	752.9418816	986.5189993	1217.149195	1410.446472	1559.306346
ZnS_mp-554115	16.60854194	10.38802303	6.322632439	4.832449913	4.869965252	5.885755415	7.755415257	10.74138049	15.49608696	22.89559792	33.98156014	50.44683374	75.43065902	113.9781796	173.2569264	263.2392512	397.1590033	589.2119637	849.0993016	1176.119824	1550.263602	1920.029618	2215.432502	2398.454244
SnS_mp-554134	15.00075152	7.564969112	4.456879652	3.841068259	4.621439386	6.475085638	9.245986671	13.0338402	18.47256975	26.64758461	39.06119321	58.06693104	87.47083846	132.8668259	202.1137777	306.7681281	463.1325366	689.3089452	997.3825704	1383.853512	1817.924148	2234.83478	2568.129618	2808.514136
ZnS_mp-554681	16.60329418	10.38524707	6.321089745	4.831413815	4.869032361	5.884725135	7.754260107	10.74024303	15.49519706	22.89507642	33.98112012	50.44557772	75.42717123	113.9709501	173.2450336	263.2227242	397.138005	589.1853125	849.0647821	1176.077019	1550.214312	1919.972952	2215.364339	2398.374807
ZnS_mp-555079	16.60850006	10.38883663	6.323179933	4.83229902	4.869234392	5.884612819	7.753999213	10.73961945	15.49356189	22.89152246	33.97476872	50.43566635	75.41267254	113.9495644	173.2115034	263.1675848	397.049096	589.051528	848.8761058	1175.820592	1549.883758	1919.59178	2214.970813	2397.964326
PrS2_mp-555096	12.29667502	8.092324417	5.501659989	4.790045577	5.18023637	6.282207382	8.113410718	11.10518308	15.97475357	23.55228076	34.95136335	52.25875848	79.13158323	120.8701705	184.7167996	281.2198302	424.8860518	630.7789612	907.9092104	1252.788417	1638.885572	2007.030131	2293.175905	2477.433415
ZnS_mp-555151	16.61125649	10.39076035	6.324347463	4.832312568	4.868593675	5.883961045	7.753819484	10.7397692	15.49313173	22.88911668	33.96897977	50.42534686	75.39654157	113.9247723	173.1711067	263.0990774	396.9380608	588.8887752	848.6565661	1175.533202	1549.523914	1919.198889	2214.600139	2397.589501
SnO2_mp-555487	21.84554928	12.67548525	7.103630819	5.033422763	4.59208389	4.970178536	6.029653343	8.053343464	11.57082091	17.16927465	25.48962245	37.68505282	56.00487196	84.05958693	127.0877382	192.6180916	290.4571904	430.2220023	617.3223899	849.5448209	1110.791799	1364.594901	1571.648068	1723.215606
ZnS_mp-555779	16.22912243	10.14147313	6.181833141	4.745074545	4.809716033	5.847950246	7.747494161	10.77669386	15.59069586	23.06288141	34.22472212	50.76006961	75.81394067	114.4623776	173.9401126	264.3283187	398.9936168	592.2509986	853.8762324	1183.167681	1559.924366	1932.1383	2229.283562	2413.274226
ZnS_mp-556005	16.62065324	10.39696246	6.328168879	4.832560942	4.866911741	5.882465193	7.754097993	10.7413837	15.49320552	22.88331146	33.95315537	50.39659507	75.35201768	113.8570692	173.0600898	262.9073349	396.6231788	588.426718	848.0374354	1174.726533	1548.515739	1918.111047	2213.60307	2396.594547
BaS3_mp-556296	15.10244286	8.701741939	5.399651106	4.564518971	5.086983094	6.474782824	8.570936045	11.63585033	16.38515994	23.841224	35.38758582	53.26787861	81.16327403	124.4083519	190.2778823	289.1525623	435.3062023	644.3244073	927.1362106	1282.621454	1685.151476	2074.278968	2384.641818	2602.733754
ZnS_mp-556395	16.12437541	10.07198791	6.142382321	4.728364952	4.805466525	5.848975949	7.750608552	10.78618465	15.61922259	23.12771578	34.34189472	50.94271381	76.07995232	114.8539464	174.5561795	265.3489169	400.6514124	594.7588808	857.4246687	1187.998308	1566.152407	1939.31011	2236.67413	2420.981556
ZnS_mp-556716	14.40051797	9.204579944	5.827111929	4.727552202	4.955145938	6.041222293	7.946643856	11.06717656	16.17540745	24.19615475	36.17328381	53.8763901	80.6950339	122.1554667	186.286427	284.3604704	430.8305887	640.2203934	921.8896116	1274.557344	1674.343356	2060.576259	2360.311582	2547.198816
ClF3_mp-556767	43.10172074	24.5267764	12.82330053	8.020933275	6.761669675	7.288177622	9.039874056	12.06384011	16.81172118	24.00318017	34.70532186	50.90337104	76.15694641	115.7171054	176.4273328	267.7666746	403.5937606	600.1546113	867.1919051	1197.28627	1560.047166	1900.54308	2152.95248	2281.370186
ZnS_mp-556815	16.63240915	10.40579147	6.33336138	4.835093655	4.867779924	5.882075629	7.752437592	10.73794662	15.48689438	22.87258589	33.9362739	50.37145621	75.3153104	113.8026354	172.9763066	262.7745773	396.4142695	588.11082	847.5817357	1174.096287	1547.693765	1917.134602	2212.542774	2395.467197
FeF2_mp-556911	32.04873155	18.78702331	9.887382875	6.315232666	5.309592033	5.521598427	6.58856074	8.701820173	12.39926861	18.36474026	27.36284286	40.65198669	60.66940454	91.41879441	138.647881	210.3397268	316.8512167	468.7984858	672.7393877	926.6899709	1212.98803	1489.920364	1706.26989	1841.178049
ZnS_mp-556950	16.61366246	10.39261284	6.325517734	4.832135085	4.867619784	5.882971109	7.753427121	10.73982651	15.49253499	22.88612773	33.9617809	50.41236198	75.37596531	113.892828	173.1189665	263.0110844	396.7962631	588.6817649	848.3780407	1175.169431	1549.069411	1918.703154	2214.132065	2397.115172
Na2S_mp-556978	9.976171788	5.842896292	3.784409684	3.374040278	4.127536068	5.929879808	8.716040427	12.52305522	17.85930424	25.83707514	38.30283905	58.33351334	90.7019504	141.6899837	218.8161834	332.4749096	498.8555715	738.8177831	1069.557223	1492.750642	1982.033646	2473.920534	2889.086716	3188.327233
ZnS_mp-557009	16.60120974	10.38363775	6.320364473	4.828890438	4.865554296	5.882280461	7.754674473	10.7434875	15.49891028	22.89541616	33.97423839	50.42873183	75.39804109	113.9238259	173.1638439	263.0778889	396.8995605	588.8458926	848.6339278	1175.54374	1549.576741	1919.345753	2214.891586	2397.942249
ZnS_mp-557308	16.03798293	10.01624793	6.112264439	4.718412774	4.806575394	5.854030729	7.755916519	10.79548437	15.64472174	23.18657399	34.45103073	51.11769577	76.34235776	115.2494988	175.1849984	266.3881698	402.3268365	597.2728008	860.9519515	1192.75669	1572.226393	1946.226163	2243.724512	2428.311163
BiO2_mp-557993	26.04446811	14.59214628	7.902375753	5.421414179	4.793819091	5.004220276	5.817484655	7.458782224	10.41738024	15.26434774	22.59262936	33.33967006	49.33931633	73.68825746	111.0117299	167.8437841	252.3253047	372.1138158	531.635675	730.0805612	955.9707766	1179.936191	1368.149277	1513.449631
TiS2_mp-558110	15.2823247	9.477973221	6.106891167	4.943412464	4.88977381	5.463838011	6.639723696	8.676981182	11.95536069	16.96474781	24.65892447	36.99431257	57.02103925	88.33146114	134.9856094	203.4021446	304.3105207	450.4109466	649.5582701	898.2380785	1176.914897	1449.19453	1679.330361	1852.519362
La10S19_mp-558229	13.31011887	8.142828478	5.320064497	4.618021725	5.102763601	6.322356494	8.196369969	11.07128641	15.6540987	22.85738755	33.92039644	50.96326785	77.50204993	118.5289663	180.7867804	274.0668215	412.0018002	609.3266513	876.1265573	1211.410913	1591.80536	1961.556438	2260.346981	2473.694732
Li2O2_mp-558312	22.72492966	13.01194881	7.132909827	4.979275921	4.656752141	5.310434413	6.720282151	9.084189625	12.95242213	19.13105447	28.73293964	43.58976527	66.72936343	102.4536058	156.3595074	236.2973773	353.5788522	521.56723	750.6677138	1041.643755	1376.185209	1708.375136	1982.583257	2176.480307
Cr2F5_mp-558380	32.49227212	18.27329654	9.423377751	6.030499012	5.132357401	5.40429593	6.506080378	8.633496408	12.31677739	18.22870228	27.13911826	40.33022884	60.23884382	90.79767378	137.6241944	208.5863035	314.0046237	464.523056	666.6959115	918.3263373	1201.331391	1474.448385	1689.685298	1830.976866
K2S_mp-559278	7.006965643	4.297196185	3.057871631	3.066184407	4.180782023	6.481458028	9.909897946	14.41322145	20.54468548	29.67264252	44.0943602	67.58317205	105.9312815	166.7514106	259.1625324	395.6939066	595.7084335	884.1666062	1282.033164	1792.108874	2382.496353	2973.62208	3465.328279	3808.617995
CoF3_mp-559473	23.75437339	14.19042422	7.823969727	5.302051357	4.613291176	4.851554016	5.866348616	7.953675803	11.65617692	17.53892559	26.16621945	38.63857715	57.2809795	85.94680648	130.2975104	198.4785159	301.0392557	448.1126382	644.7108085	886.7297611	1154.616828	1407.577862	1602.962508	1730.775433
V9O17_mp-559485	19.870922	12.83229699	7.734429349	5.594964369	4.980351238	5.184276442	6.12657117	8.118221897	11.67294877	17.34997319	25.85099697	38.55936953	58.00613033	87.87796351	133.2002926	201.3673054	302.6265035	447.4273376	641.3117381	880.5599555	1146.496953	1400.736056	1603.126673	1740.959333
IrF6_mp-560553	32.34934454	17.86373426	9.162426897	5.812572685	4.745459146	4.692240895	5.363043877	6.944628227	9.854925325	14.56217392	21.5769482	31.854203	47.30146792	71.00118066	107.4363672	163.0480879	246.1462264	364.5667325	521.9346163	714.8270809	928.4142789	1132.61209	1297.521259	1419.41975
ZnS_mp-560588	16.65849004	10.42514209	6.345834756	4.837604469	4.864535847	5.878153272	7.751523894	10.73881145	15.48225664	22.85136019	33.88752285	50.28675301	75.18558645	113.6063402	172.6585489	262.2348455	395.5355415	586.8165021	845.8258624	1171.781134	1544.769725	1913.90728	2209.459091	2392.333001
Sb2O3_mp-560607	26.17370386	14.2152442	7.629183034	5.315856464	4.968837039	5.612044436	6.981063192	9.274603441	13.04671671	19.02498491	28.05610031	41.48242258	61.75868804	92.84055682	140.4613834	212.752399	320.4109455	474.4557205	681.7061789	940.1639389	1232.029385	1516.393359	1745.774457	1905.922448
Nd10S19_mp-560786	12.25995313	8.088677361	5.507060332	4.797036154	5.185456621	6.280419352	8.097878476	11.07076585	15.92095266	23.48288315	34.86357832	52.12475127	78.88943482	120.4352308	183.9996641	280.1076744	423.1684307	628.0955398	903.8618304	1247.24416	1632.230572	2000.02597	2286.431674	2471.213782
PbS_mp-561320	15.75779289	8.24226412	5.053315561	4.381928651	5.142399862	6.881840676	9.301537836	12.50119505	17.25948433	24.84345211	36.8404599	55.41640779	83.89198758	127.2769678	192.9137243	291.8093395	439.454209	652.856042	943.0626069	1306.770881	1716.790091	2114.146339	2431.213111	2648.480386
NbS3_mp-562100	14.23392908	8.855729931	5.678405798	4.670916929	4.819454708	5.676853244	7.246533429	9.891782279	14.18569495	20.78018066	30.63208077	45.64837468	69.10482338	105.5260956	160.9020702	244.1906047	368.3470793	547.3005973	789.2062094	1089.947182	1425.441419	1746.739142	2004.189817	2183.515406
MoO3_mp-562561	29.08229029	16.16184581	8.404073725	5.487063362	4.80803886	5.220098231	6.430867515	8.632402208	12.34298719	18.22252246	27.01734401	39.95832244	59.39207781	89.12522564	134.6189749	203.5681305	306.1715621	453.1199548	651.2219874	898.8486489	1179.405038	1454.139834	1676.202955	1827.651209
Fe2O3_mp-565814	23.20513556	14.29584183	8.018419337	5.493026252	4.87659729	5.242744622	6.395442631	8.618306424	12.51727262	18.81212696	28.25533137	42.08015689	62.75023461	94.3947499	143.0425776	217.1168131	327.3789045	484.618228	695.6929985	959.5736433	1259.137477	1550.885674	1781.287431	1929.495144
PbI2_mp-567178	20.76936553	11.67176621	7.341949589	6.01457807	6.295948432	7.393054302	8.910506273	11.07203328	14.72637161	21.07238433	31.49521937	47.71936138	72.38008587	109.7523835	166.4533095	252.3830801	380.9792331	566.1845335	815.9197882	1126.296638	1476.057556	1818.175471	2090.37072	2262.345783
CdI2_mp-567259	17.13381173	10.21745151	6.56866151	5.429942268	5.790476174	7.065412541	8.975162266	11.72878043	16.11925176	23.29342751	34.5699841	51.7069535	77.63681055	117.1791138	177.5839675	269.3799603	406.6860307	604.2531426	870.9043583	1203.534137	1580.606785	1951.736805	2247.291199	2428.491355
CdI2_mp-567296	17.27987194	10.30598434	6.618095759	5.466498597	5.821528274	7.085957999	8.974648214	11.69828595	16.05199924	23.18315466	34.4129362	51.50241737	77.38041766	116.8519225	177.1402667	268.7237504	405.6253837	602.4695664	868.0297717	1199.319229	1574.956437	1944.603698	2238.89648	2419.766779
CdI2_mp-567402	17.15595156	10.22341165	6.574666089	5.436101267	5.799517906	7.08205961	9.003929886	11.77277944	16.18268304	23.38506174	34.70605133	51.91459916	77.95832521	117.6752116	178.3371788	270.5102727	408.3892693	606.8296262	874.7003769	1208.792697	1587.376592	1959.892826	2256.458969	2437.935923
SiC_mp-567505	23.89618304	13.24050634	7.026303044	4.765480149	4.405739273	5.069481291	6.549665204	9.038176413	13.04502262	19.27109537	28.61750203	42.61510554	63.988613	96.86412207	146.889117	222.0688402	333.6416524	494.3428976	713.155913	989.0261282	1303.349586	1613.230818	1866.831561	2042.440361
PbI2_mp-567542	20.16608724	11.29896802	7.123324912	5.888645278	6.239536279	7.4091189	9.003540375	11.24386205	14.99161414	21.46958945	32.0913117	48.61735229	73.73566836	111.802917	169.5687512	257.1450962	388.2613872	577.1742128	832.0338221	1148.903774	1505.790968	1854.034562	2129.964427	2303.782058
In6Se7_mp-567596	13.58513621	8.135842196	5.260810737	4.521797804	4.913054706	5.972743051	7.643776787	10.27605708	14.51292263	21.13327822	31.18022003	46.49477675	70.16867543	106.592625	161.7727658	244.6128399	367.5576431	543.8015833	781.900281	1080.500589	1419.325115	1750.838624	2024.098996	2227.090703
AgI_mp-567809	13.84808579	8.502259823	5.567944205	4.704352165	5.117794045	6.338253841	8.154536993	10.79879615	15.03156198	21.9224158	32.66497189	48.8300648	73.09067476	109.9260672	166.1274271	251.4701197	378.7820859	561.3141753	807.6953855	1117.501481	1474.137256	1832.315343	2126.775457	2320.977498
TeI4_mp-567914	17.40666978	9.818962937	6.132840844	5.199047991	5.770982396	7.209512461	9.195056334	11.94860727	16.29848867	23.40520535	34.60718175	51.72198754	77.76386138	117.6736797	178.9805025	272.6338267	412.9063194	614.1447607	884.8953543	1221.935323	1600.219406	1961.720393	2238.608007	2412.440953
InBr2_mp-568108	18.48280948	10.29751547	6.289827886	5.10686362	5.561564093	7.122537694	9.538672325	12.92411158	17.96607919	25.78832585	37.84242266	56.28820477	84.69470493	128.5262358	195.558384	297.104661	449.0955178	669.0605577	967.3311546	1337.671297	1750.357215	2146.662499	2455.278389	2643.150279
GaSe_mp-568263	16.07381204	8.829787462	5.259332118	4.307896184	4.697237148	5.898846629	7.75703212	10.51986446	14.84627169	21.63400223	32.00852909	47.74019421	71.81444709	108.7543986	165.0000599	249.8705413	375.9534279	556.6036842	800.9557161	1108.337356	1458.368896	1801.804083	2084.809966	2297.633522
TbCl_mp-568342	11.43360201	7.813783007	5.480842035	4.764857108	4.989898644	5.840294404	7.4119674	10.13209195	14.5759511	21.34684727	31.40292879	46.81080684	71.12676552	109.1366957	167.0457486	254.2320457	384.4554266	572.3596225	825.9503676	1140.234954	1490.049136	1823.48278	2083.037342	2241.473891
SiC_mp-568619	23.87685006	13.22518864	7.017757477	4.762121468	4.40406477	5.066776706	6.544127681	9.029622273	13.03490427	19.2614513	28.60919909	42.60613948	63.97335686	96.83472116	146.8400127	221.9992248	333.545462	494.1914596	712.9040603	988.6486972	1302.841896	1612.56436	1866.035232	2041.767405
SiC_mp-568696	23.93580681	13.27695973	7.047559665	4.773864523	4.409445844	5.07488901	6.561023627	9.055939972	13.0656634	19.28938878	28.63045345	42.62577635	64.00779062	96.90690993	146.9639596	222.1711641	333.7769861	494.5677582	713.5635579	989.6620071	1304.217546	1614.40717	1868.2635	2043.522074
SiC_mp-568735	24.03897704	13.4256196	7.152245217	4.821378611	4.435840823	5.112372062	6.632334549	9.164367062	13.19303679	19.40826955	28.72732177	42.72540429	64.18420367	97.26202847	147.5631145	223.0112989	334.9265667	496.3987117	716.6552379	994.2923656	1310.364462	1622.427938	1877.935344	2051.744914
Ag2Se_mp-568889	9.356303618	7.082206712	5.368442195	4.928091993	5.365459123	6.48523121	8.498441552	12.00593351	17.78855271	26.57271808	39.35144784	58.41218706	88.01914996	134.3152212	205.6527605	314.4049587	477.7829648	713.1985034	1029.679821	1421.32465	1857.676354	2271.366778	2581.707565	2744.50087
PdI2_mp-569017	11.89807985	7.287848492	4.945893095	4.58859236	5.471689892	7.206259014	9.661075251	13.19466564	18.67256309	27.19003888	40.04659434	59.37283338	89.07952583	135.5995357	208.6487013	322.2397522	494.1170253	740.8332526	1069.902261	1471.713907	1905.090914	2287.338741	2539.219575	2657.896719
SiB3_mp-569128	21.70369491	11.6490335	6.171184847	4.305058654	4.101599877	4.801273573	6.249650681	8.666955666	12.57412504	18.66982455	27.85773273	41.66772893	62.7554463	95.04813343	143.9015277	217.0359542	325.4207611	481.6123591	695.0187546	966.0244595	1277.701817	1588.739029	1851.584371	2051.234588
CaTe_mp-569170	11.09494659	6.534836975	4.344727823	4.00828124	4.888891014	6.672355583	9.132368657	12.41523338	17.29083831	25.00187588	37.21703941	56.42317241	86.4941007	133.0039186	203.5801773	309.1170393	464.761496	687.6209756	990.8146784	1375.762667	1818.830199	2257.586607	2616.544748	2871.147394
Cs2Se_mp-569272	6.375543664	4.030721059	3.110597711	3.415481562	4.841807357	7.251634415	10.24227234	13.80174811	18.87643989	27.15491379	40.95624147	63.5814965	99.76793882	155.8664931	240.2103338	364.7849338	546.9596561	807.596935	1164.833449	1624.973946	2164.924163	2711.783007	3169.64147	3500.395653
PCl5_mp-569410	22.53351246	12.40491246	6.997769689	5.277122275	5.436702554	6.751967865	9.024512363	12.45021212	17.6535763	25.57273235	37.5216788	55.76557562	84.23284774	128.8162328	197.5937679	301.9106389	457.3202228	680.7629025	982.7604649	1357.875811	1773.493769	2162.918736	2454.644	2629.459483
CdI2_mp-569468	17.19378919	10.2011454	6.565963694	5.450345903	5.847237502	7.179317897	9.162207064	11.99887958	16.49431455	23.82744317	35.36777276	52.94683024	79.59453643	120.2479932	182.3028737	276.5215449	417.4328675	620.3122736	894.2546143	1235.739397	1622.100316	2001.410903	2302.459146	2485.639032
CdI2_mp-569611	16.90935817	10.07040651	6.477972746	5.37551552	5.761967566	7.062364309	8.999756675	11.78352524	16.21022975	23.43230109	34.77407048	52.00169454	78.06329299	117.8080312	178.5384369	270.861621	408.9847186	607.7332248	875.9977182	1210.710893	1590.134742	1963.271105	2260.018083	2442.016466
TiBr4_mp-569814	18.98161107	10.7308123	6.701434485	5.463699492	6.014941366	7.950844763	11.09607807	15.50735287	21.79455497	31.13055034	45.23605804	66.91056608	100.80633	153.7204756	234.7455259	356.9625444	539.8780379	806.3682839	1169.708867	1618.776349	2112.545138	2580.460125	2937.089329	3132.811731
MnBr2_mp-569843	17.36944615	10.09927052	6.133342609	4.958915857	5.292345966	6.537647281	8.504560919	11.45117417	16.10250903	23.46064729	34.76171965	51.92345805	78.25813971	118.9469948	181.4218356	276.1806084	416.9936477	618.0949112	888.6530376	1226.627674	1607.936535	1975.295817	2262.545402	2450.750524
CeBr3_mp-569850	11.66376409	7.710578558	5.297046318	4.567112729	4.790814461	5.64779143	7.224091685	9.9232903	14.28658184	20.88207901	30.64563316	45.62109693	69.30411034	106.3566965	162.7981615	247.7921792	374.8888604	558.4250951	805.5791511	1109.595758	1443.464636	1755.955768	1994.282776	2137.328164
SrP3_mp-569867	11.98411561	7.29197306	4.788380948	4.166495443	4.597072657	5.727012552	7.553154134	10.40260924	14.8345441	21.55151512	31.67696876	47.38393169	72.2115411	110.7944859	169.026187	255.8887464	385.1050473	572.5384458	829.1775328	1153.419457	1521.703642	1882.740392	2183.298484	2406.84065
K3Bi_mp-569940	7.490307731	5.396442853	4.550217321	5.084532194	6.755101587	9.255747302	12.39560143	16.47875943	22.34887006	31.42749278	46.32922161	71.72340712	114.2119745	180.4424113	276.1605277	410.7992373	603.6344305	881.8488739	1269.805496	1774.763722	2367.165589	2964.730635	3466.955931	3816.007068
CdI2_mp-569964	17.16148673	10.22641169	6.576767619	5.437503227	5.800607682	7.083288735	9.005732503	11.77545326	16.18651117	23.39056736	34.71421277	51.92707479	77.97770408	117.705078	178.38199	270.5762873	408.4879562	606.9806657	874.9261804	1209.104999	1587.774108	1960.373621	2257.00877	2438.493874
[truncated: 10,720 more rows]
